# Supplementary material for: COVID-19 Outbreak in North Italy: An Overview on Dentistry. A Questionnaire Survey
Source: Int J Environ Res Public Health. 2020 May 28;17(11):3835. doi: 10.3390/ijerph17113835 (PMC7312000; doi:10.3390/ijerph17113835)
Supplement: Supplementary file 1 [file ijerph-17-03835-s001.xlsx]

## Sheet: Sheet1
Table S1. Row data
934	1	38	1	1	0	0	0	0	0	0	0	0	0	0	0	0	0	0	1	0	1		7-14 marzo	0	0	0	0	0	0	0	0	0	0	0	0	0	0	0	0	0	0	0	0	0	0	0	0	0	0
78	1	65	9	9	0	0	0	0	0	0	0	0	0	0	0	0	0	0	1	0	2			1	2	3	4	5	6	0	0	9	10	0	12	13	14	0	16	0	0	0	0	21	22	0	0	25	26
1118	1	62	7	7	1	2	3	4	0	0	0	0	0	10	0	0	0	0	2	0	2		21-23 febbraio	0	0	0	0	0	0	0	0	0	0	0	0	0	0	0	0	0	0	0	0	0	0	0	0	0	0
1693	0	62			0	0	0	0	0	0	0	0	0	0	0	0	0	0	2	0	2			0	0	0	4	5	6	7	0	9	10	0	12	0	0	0	0	0	0	0	0	0	0	0	24	25	26
330	0	63			0	0	0	0	0	0	0	0	0	0	0	0	0	0	1	0	2			0	2	3	4	5	6	7	8	9	0	0	12	13	14	15	16	0	18	0	0	21	22	0	0	25	26
138	0	69			0	0	0	0	0	0	0	0	0	0	0	0	0	0	1	0	2			0	0	0	0	0	0	0	0	0	0	0	0	0	0	0	0	0	0	0	0	0	0	0	0	0	0
620	0	71	1		0	0	0	0	0	0	0	0	0	0	0	0	0	0	1	0	2			0	0	0	0	5	0	0	0	0	0	0	0	0	0	0	0	0	0	0	20	0	0	0	24	0	26
2611	0	57	4	1	0	0	0	0	0	0	0	0	0	0	0	0	0	0	1	0	2			0	2	0	4	5	0	0	0	0	0	0	0	13	0	0	16	0	0	0	0	0	0	0	24	25	26
3725	0	55	7	8	0	0	0	0	0	0	0	0	0	0	0	0	0	0	1	0	2			1	2	3	4	0	6	0	0	9	10	0	12	0	14	0	0	0	0	0	0	0	0	0	24	25	0
2054	0	46	10	10	0	0	0	0	0	0	0	0	0	0	0	0	0	0	1	0	2			0	2	3	4	5	6	0	0	9	0	0	0	0	0	15	0	0	0	0	0	21	0	0	24	25	0
733	1	57	6	6	1	2	3	4	0	6	7	8	9	10	11	12	13	0	1	0	2	24 febbraio - 1 marzo		1	2	3	4	5	6	0	0	9	10	11	12	13	14	0	16	0	0	0	0	21	22	0	0	25	26
1720	0	38	5	5	0	0	0	0	0	0	0	0	0	0	0	0	0	0	1	0	2			0	0	0	0	0	6	0	0	9	0	0	0	0	0	0	0	0	0	0	0	21	0	0	24	25	0
2685	0	57	1	1	1	0	0	4	5	6	7	8	0	10	11	12	13	14	2	1	2			1	2	0	4	5	6	0	0	0	10	0	12	0	0	0	0	0	0	0	0	0	0	0	24	25	0
317	0	65	4	4	0	0	0	0	0	0	0	0	0	0	0	0	0	0	1	1	2			1	0	0	4	0	6	7	0	0	0	0	12	0	0	0	0	0	0	0	0	0	22	0	0	0	26
1879	0	69	4	4	0	0	0	0	0	0	0	0	0	0	0	0	0	0	1	1	2			1	0	0	4	5	0	0	0	0	0	0	12	0	0	0	0	0	0	0	0	0	0	0	0	0	0
1268	0	68	4	4	0	0	0	0	0	0	0	0	0	0	0	0	0	0	3	1	2			1	2	0	0	0	6	0	0	0	10	0	12	0	14	0	0	0	0	0	0	21	0	0	24	25	26
3420	0	62	4	4	0	0	0	0	0	0	0	0	0	0	0	0	0	0	3	1	2			0	2	0	4	5	6	7	8	9	10	11	12	13	0	0	0	0	0	0	20	21	22	0	24	25	26
1728	1	36	8	8	0	0	0	0	0	0	0	0	0	0	0	0	0	0	1	1	2			0	0	0	0	0	6	0	0	0	10	0	0	0	0	0	0	0	0	0	0	21	0	0	24	25	26
442	0	64	6	1	1	0	0	0	0	0	0	0	0	0	0	0	0	0		1	2			0	0	0	0	0	0	0	0	0	0	0	0	0	0	0	0	0	0	0	0	0	0	0	0	0	0
1120	1	56	5	5	1	0	3	0	0	0	0	0	0	0	0	0	0	0	1	1	2			1	0	0	0	0	0	0	0	0	0	0	0	0	0	0	0	0	0	0	0	0	0	0	0	0	0
1776	0	51	1	1	0	0	0	0	0	0	0	0	0	0	0	0	0	0	1		2			1	2	0	4	5	0	0	8	0	0	0	0	0	0	0	0	0	0	0	0	0	0	0	0	0	0
766	0	59	6	6	0	0	0	0	0	0	0	0	0	0	0	0	0	0	1		2			1	2	0	4	5	6	0	0	0	10	0	12	0	0	0	0	0	0	0	0	21	0	0	24	25	26
2754	0	70	5	5	0	0	0	0	0	0	0	0	0	0	0	0	0	0	1		2			1	2	0	4	5	6	7	8	9	0	0	12	13	14	15	0	0	18	0	0	21	22	23	0	25	26
1167	0	64	9	9	0	0	0	0	0	0	0	0	0	0	0	0	0	0	1		2			0	0	0	0	5	0	7	8	0	0	0	12	0	0	0	0	0	0	0	0	21	0	0	24	0	0
2666	1	49	1	1	0	0	0	0	0	0	0	0	0	0	0	0	0	0	1	0	2	21-23 febbraio		1	2	0	4	5	6	7	0	9	10	11	12	13	14	15	0	0	0	0	0	21	22	23	0	25	26
1827	0	28	1	1	0	0	0	0	0	0	0	0	0	0	0	0	0	0	1	0	2	7-14 marzo		1	2	0	4	5	6	0	8	9	10	11	12	0	14	15	16	0	0	0	0	21	22	0	24	25	26
1030	0	62	1	1	0	0	0	0	0	0	0	0	0	0	0	0	0	0	1	0	2	7-14 marzo		0	2	0	4	5	0	0	0	0	0	0	0	0	0	0	16	0	0	0	0	0	0	0	24	25	26
3007	0	58	1	1	0	0	0	0	0	0	0	0	0	0	0	0	0	0	1	0	2	24 febbraio - 1 marzo		1	2	0	4	5	6	0	0	9	10	0	12	13	14	15	0	0	0	0	0	21	0	0	24	25	26
2836	1	53	1	1	0	0	0	0	0	0	0	0	0	0	0	0	0	0	1	0	2	7-14 marzo		1	2	0	4	5	0	0	0	0	10	0	12	0	14	15	16	0	0	0	0	21	0	23	0	25	26
963	0	35	1	1	0	0	0	0	0	0	0	0	0	0	0	0	0	0	2	0	2	21-23 febbraio		1	2	3	4	5	6	7	8	9	10	0	12	13	14	15	16	0	0	0	0	21	22	0	24	25	26
3085	1	26	1	1	0	0	0	0	0	0	0	0	0	0	0	0	0	0	2	0	2	7-14 marzo		1	0	0	0	0	6	7	0	0	0	0	0	13	0	0	0	0	0	0	0	0	0	0	24	25	0
3663	0	60	1	1	0	0	0	0	0	0	0	0	0	0	0	0	0	0	1	0	2	7-14 marzo		1	2	0	4	5	6	7	8	9	0	11	12	13	14	0	0	0	18	0	0	21	0	23	0	25	26
92	1	42	1	1	0	0	0	0	0	0	0	0	0	0	0	0	0	0	1	0	2	2-6 marzo		1	2	3	4	5	6	0	8	9	10	11	12	13	14	0	0	17	0	0	0	21	0	0	24	25	26
3397	1	26	1	1	0	0	0	0	0	0	0	0	0	0	0	0	0	0	2	0	2	7-14 marzo		1	2	3	4	5	6	0	0	0	10	11	12	13	14	0	16	0	0	0	0	0	0	0	24	25	26
3200	0	50	1	1	0	0	0	0	0	0	0	0	0	0	0	0	0	0	1	0	2	24 febbraio - 1 marzo		1	2	3	4	5	6	7	0	9	10	0	12	13	14	0	16	0	0	0	0	21	22	0	0	25	26
1759	0	39	1	1	0	0	0	0	0	0	0	0	0	0	0	0	0	0	1	0	2	dopo il 14 marzo		0	2	3	4	5	6	0	0	9	10	11	12	13	14	0	0	0	0	19	0	21	22	0	0	25	26
2518	0	33	1	1	0	0	0	0	0	0	0	0	0	0	0	0	0	0	2	0	2	7-14 marzo		1	2	0	0	0	6	0	0	9	10	0	12	0	0	0	0	0	0	0	0	0	22	0	0	25	0
2449	0	65	1	1	0	0	0	0	0	0	0	0	0	0	0	0	0	0	3	0	2	dopo il 14 marzo		1	0	0	0	0	0	0	0	0	0	0	0	0	0	0	0	0	0	0	0	0	0	0	0	0	0
2503	0	63	1	1	0	0	0	0	0	0	0	0	0	0	0	0	0	0	2	0	2	2-6 marzo		1	2	0	0	0	6	0	0	9	10	0	12	0	0	15	0	0	0	0	0	21	22	23	0	25	0
2149	1	60	1	1	0	0	0	0	0	0	0	0	0	0	0	0	0	0	3	0	2	dopo il 14 marzo		0	0	0	0	0	0	0	0	0	0	0	12	0	0	0	0	0	0	0	0	0	0	0	24	25	0
1198	0	65	1	1	1	2	3	4	0	6	0	0	0	0	0	0	0	0	1	0	2	24 febbraio - 1 marzo		1	0	0	0	0	0	0	0	0	0	0	0	0	0	0	0	0	0	0	0	0	0	0	0	0	0
183	0	66	1	1	0	0	0	0	0	0	0	0	0	0	0	0	0	0	1	0	2	2-6 marzo		1	2	3	4	5	6	0	8	9	10	0	12	13	14	0	16	0	0	0	0	21	22	23	0	25	26
325	1	31	1	1	0	0	0	0	0	0	0	0	0	0	0	0	0	0	1	0	2	2-6 marzo		1	2	3	4	5	6	0	0	0	10	11	12	13	14	15	16	0	0	0	0	21	22	0	24	25	26
2776	1	49	1	1	0	0	0	0	0	0	0	0	0	0	0	0	0	0	2	0	2	7-14 marzo		1	2	3	0	5	6	7	0	9	10	11	12	13	14	15	16	17	0	0	0	21	22	0	24	25	26
3698	0	61	1	1	1	0	0	0	0	0	0	0	0	0	11	0	0	0	1	0	2	7-14 marzo		1	2	0	4	5	6	0	0	9	10	11	12	13	14	0	0	0	0	0	0	21	22	0	24	25	26
3217	1	42	1	1	1	0	3	4	0	0	0	0	9	0	11	0	0	0	1	0	2	21-23 febbraio		1	2	3	4	5	6	0	0	9	10	0	12	0	14	0	16	0	0	0	0	21	0	0	24	25	26
415	1	61	1	1	0	0	0	0	0	0	0	0	0	0	0	0	0	0	1	0	2	24 febbraio - 1 marzo		0	0	3	4	5	6	0	0	9	10	11	12	13	14	0	16	0	0	0	0	21	22	23	24	25	26
1770	1	42	1	1	0	0	0	0	0	0	0	0	0	0	0	0	0	0	2	0	2	2-6 marzo		0	2	3	4	5	6	0	0	9	10	0	12	13	14	0	16	0	0	0	0	21	22	0	24	25	26
3315	0	26	1	1	0	0	0	0	0	0	0	0	0	0	0	0	0	0	2	0	2	7-14 marzo		1	0	0	4	5	6	0	0	0	10	0	12	0	0	0	0	0	0	0	20	21	0	23	0	0	0
2258	0	63	1	1	0	0	0	0	0	0	0	0	0	0	0	0	0	0	2	0	2	24 febbraio - 1 marzo		1	2	0	4	5	6	0	0	9	10	11	12	13	14	0	16	0	18	0	0	21	0	23	0	25	26
551	0	25	1	1	0	0	0	0	0	0	0	0	0	0	0	0	0	0	1	0	2	7-14 marzo		1	2	3	4	5	6	7	8	9	10	0	12	13	14	15	16	17	18	19	20	21	22	23	24	25	26
2464	1	38	1	1	0	0	0	0	0	0	0	0	0	0	0	0	0	0	1	0	2	7-14 marzo		1	2	0	0	0	0	7	0	9	10	0	0	13	0	15	16	0	0	0	0	0	22	0	0	25	26
1382	0	52	1	1	0	0	0	0	0	0	0	0	0	0	0	0	0	0	1	0	2	2-6 marzo		1	2	3	4	5	6	0	0	9	10	11	12	13	14	0	16	0	0	0	0	21	0	0	0	25	0
3216	0	45	1	1	1	0	0	0	0	0	0	0	0	0	0	0	0	0	1	0	2	2-6 marzo		1	2	3	4	5	6	7	8	9	10	11	12	13	0	0	16	0	0	0	0	21	22	0	0	25	26
2139	0	58	1	1	0	0	0	0	0	0	0	0	0	0	0	0	0	0	3	0	2	24 febbraio - 1 marzo		1	2	3	4	5	6	0	0	9	10	11	12	13	14	0	16	0	0	0	0	21	0	23	24	25	26
3185	0	61	1	1	1	2	0	0	0	0	0	0	9	10	11	0	0	0	1	0	2	24 febbraio - 1 marzo		0	2	3	4	5	6	0	0	0	10	0	12	0	0	0	16	0	0	0	0	0	22	0	24	25	26
2246	0	65	1	1	0	0	0	0	0	0	0	0	0	0	0	0	0	0	1	0	2	21-23 febbraio		0	2	0	4	5	0	0	0	0	0	0	0	0	0	0	16	0	0	0	0	0	0	0	24	25	26
2800	0	60	1	1	0	0	0	0	0	0	0	0	0	0	0	0	0	0	1	0	2	2-6 marzo		0	2	0	0	5	6	0	0	9	10	0	12	0	0	0	0	0	0	0	0	21	0	0	24	25	26
511	0	69	1	1	0	0	0	0	0	0	0	0	0	0	0	0	0	0	1	0	2	21-23 febbraio		1	0	0	4	5	6	7	8	9	10	11	12	13	14	0	16	0	0	0	0	21	0	23	0	25	26
131	0	46	1	1	1	0	0	4	0	0	0	0	0	0	11	0	0	0	2	0	2	24 febbraio - 1 marzo		1	2	3	4	5	6	0	0	9	10	11	0	0	0	0	0	0	0	19	0	21	22	0	0	0	26
181	0	67	1	1	0	0	0	0	0	0	0	0	0	0	0	0	0	0	1	0	2	2-6 marzo		1	2	3	4	5	6	0	0	9	0	0	12	13	0	0	0	0	0	0	0	21	22	0	24	25	26
2057	0	43	1	1	0	0	0	0	0	0	0	0	0	0	0	0	0	0	1	0	2	2-6 marzo		1	2	3	4	5	6	0	0	9	10	11	12	13	14	0	16	0	0	19	0	21	0	23	0	25	26
2755	0	63	1	1	0	0	0	0	0	0	0	0	0	0	0	0	0	0	2	0	2	7-14 marzo		0	0	0	0	0	0	0	0	0	0	0	0	0	0	0	0	0	0	0	0	0	0	0	0	0	0
827	0	49	1	1	0	0	0	0	0	0	0	0	0	0	0	0	0	0	1	0	2	21-23 febbraio		1	2	3	4	5	6	7	8	9	10	11	12	13	14	0	16	0	0	0	0	21	22	0	0	25	26
2882	1	56	1	1	0	0	0	0	0	0	0	0	0	0	0	0	0	0	1	0	2	7-14 marzo		1	2	0	0	0	6	0	0	9	0	0	12	13	0	0	0	0	0	0	0	21	22	23	0	25	0
1635	0	64	1	1	0	0	0	0	0	0	0	0	0	0	0	0	0	0	2	0	2	2-6 marzo		1	2	0	0	0	6	0	0	9	10	0	12	13	14	0	0	0	0	0	0	0	22	0	0	25	26
590	1	40	1	1	0	0	0	0	0	0	0	0	0	0	0	0	0	0	1	0	2	2-6 marzo		1	2	3	4	5	6	0	0	9	10	0	12	13	14	15	16	0	0	0	0	21	0	23	24	25	26
1673	1	26	1	1	0	0	0	0	0	0	0	0	0	0	0	0	0	0	2	0	2	2-6 marzo		1	2	3	4	5	6	7	8	9	10	0	12	13	0	15	16	0	0	0	0	21	0	0	24	25	26
2096	1	44	1	1	0	0	0	0	0	0	0	0	0	0	0	0	0	0	1	0	2	dopo il 14 marzo		1	2	0	4	5	6	0	0	9	10	0	12	13	14	0	16	0	0	0	20	21	0	0	24	25	26
1650	0	46	1	1	0	0	0	0	0	0	0	0	0	0	0	0	0	0	2	0	2	2-6 marzo		1	2	3	4	5	6	7	8	9	10	11	12	13	14	0	16	0	0	0	0	21	22	0	24	25	26
3683	0	27	1	1	0	0	0	0	0	0	0	0	0	0	0	0	0	0	1	0	2	24 febbraio - 1 marzo		1	2	3	0	0	0	0	0	0	0	0	0	0	0	0	0	0	0	0	0	0	0	0	0	0	0
3191	0	61	1	2	0	0	0	0	0	0	0	0	0	0	0	0	0	0	2	0	2	2-6 marzo		1	2	3	4	5	6	0	0	9	10	0	12	13	14	15	16	0	0	0	0	21	22	0	24	25	26
3466	0	60	1	4	0	0	0	0	0	0	0	0	0	0	0	0	0	0	1	0	2	21-23 febbraio		1	2	3	4	5	6	7	0	9	0	0	12	13	0	0	16	0	0	0	0	21	0	0	24	25	26
383	1	33	1	4	1	2	0	0	0	0	0	0	9	0	0	0	0	0	2	0	2	7-14 marzo		1	2	0	4	5	6	7	8	9	10	11	12	13	0	0	16	0	0	0	0	21	22	0	0	25	26
1360	1	37	1	6	0	0	0	0	0	0	0	0	0	0	0	0	0	0	1	0	2	21-23 febbraio		1	2	3	4	5	6	0	0	9	10	0	12	13	14	0	0	0	18	0	0	21	22	0	0	25	26
3457	0	63	1	8	0	0	0	0	0	0	0	0	0	0	0	0	0	0	1	0	2	21-23 febbraio		1	2	3	4	5	6	0	0	9	10	11	12	13	14	0	16	17	0	0	0	21	0	23	24	25	26
1497	0	38	1	8	1	0	3	0	0	6	0	0	0	10	0	0	0	14	2	0	2	7-14 marzo		1	2	3	4	5	6	7	8	9	10	0	12	13	14	15	16	0	0	0	0	21	0	23	24	25	26
3391	0	55	1	13	1	0	3	0	0	0	0	0	0	0	0	0	0	0	1	0	2	7-14 marzo		1	2	3	4	5	6	0	0	0	10	0	12	13	14	0	16	0	18	0	0	21	0	0	24	25	26
721	0	60	1		0	0	0	0	0	0	0	0	0	0	0	0	0	0	1	0	2	21-23 febbraio		1	2	0	4	5	6	7	8	9	10	11	12	13	14	15	16	17	18	19	0	21	22	23	24	25	26
273	1	30	4	1	0	0	0	0	0	0	0	0	0	0	0	0	0	0	1	0	2	dopo il 14 marzo		0	2	0	0	0	6	7	8	0	10	11	12	13	14	0	0	0	0	0	0	0	0	0	24	25	26
2931	0	63	4	4	0	0	0	0	0	0	0	0	0	0	0	0	0	0	1	0	2	dopo il 14 marzo		1	2	0	0	0	6	0	0	0	10	0	12	13	0	0	16	0	0	0	0	0	22	23	0	25	0
1305	0	58	4	4	0	0	0	0	0	0	0	0	0	0	0	0	0	0	1	0	2	7-14 marzo		1	2	3	4	5	6	0	0	9	10	11	12	0	14	0	16	0	0	0	0	21	22	0	0	25	26
3015	0	55	4	4	0	0	0	0	0	0	0	0	0	0	0	0	0	0	2	0	2	21-23 febbraio		1	2	0	0	0	6	0	0	0	0	0	12	0	0	0	16	0	0	0	0	21	0	23	0	25	26
478	0	37	4	4	0	0	0	0	0	0	0	0	0	0	0	0	0	0	1	0	2	2-6 marzo		1	2	3	4	5	6	7	8	9	10	11	12	13	14	0	16	0	0	0	0	21	22	0	0	25	0
1724	0	26	4	4	0	0	0	0	0	0	0	0	0	0	0	0	0	0	1	0	2	7-14 marzo		1	2	3	4	0	6	0	0	9	10	0	12	13	14	0	16	0	0	0	0	0	0	23	0	25	26
1913	0	65	4	4	0	0	0	0	0	0	0	0	0	0	0	0	0	0	1	0	2	2-6 marzo		1	0	3	4	5	6	7	8	9	10	11	12	13	14	0	16	0	0	0	0	21	0	0	24	25	26
1410	0	64	4	13	1	2	0	4	0	0	0	0	9	10	0	0	0	0	1	0	2	7-14 marzo		1	2	3	4	5	6	7	0	9	10	11	12	13	14	15	0	0	0	0	0	21	22	0	24	25	26
2016	0	45	8	1	0	0	0	0	0	0	0	0	0	0	0	0	0	0	2	0	2	7-14 marzo		1	2	0	4	5	6	0	0	0	0	0	12	13	14	15	16	0	0	0	0	21	0	23	24	25	26
3358	1	39	8	1	0	0	0	0	0	0	0	0	0	0	0	0	0	0	1	0	2	2-6 marzo		1	2	3	4	5	6	0	0	0	10	11	12	13	0	0	0	0	18	0	0	21	22	0	0	25	26
370	0	48	8	1	0	0	0	0	0	0	0	0	0	0	0	0	0	0	2	0	2	24 febbraio - 1 marzo		1	2	3	4	5	6	7	8	9	10	11	12	13	14	0	16	0	0	0	0	21	22	23	0	25	26
3738	0	54	8	1	0	0	0	0	0	0	0	0	0	0	0	0	0	0	1	0	2	2-6 marzo		1	2	0	4	5	6	0	0	9	10	0	12	13	14	15	16	0	0	0	0	21	22	0	24	25	26
1504	0	33	8	7	0	0	0	0	0	0	0	0	0	0	0	0	0	0	1	0	2	7-14 marzo		1	2	3	4	5	6	0	0	9	10	0	12	13	14	0	16	0	0	0	0	21	0	0	0	25	0
254	0	28	8	8	0	0	0	0	0	0	0	0	0	0	0	0	0	0	1	0	2	24 febbraio - 1 marzo		1	2	0	4	5	6	0	0	9	10	0	0	0	14	0	16	0	18	0	0	0	22	0	24	25	0
1378	0	63	8	8	1	0	3	4	5	6	0	0	0	0	0	0	0	0	1	0	2	dopo il 14 marzo		1	0	3	0	0	6	0	8	0	0	0	12	0	14	0	16	0	0	0	0	0	0	0	0	25	26
1388	0	63	8	8	0	0	0	0	0	0	0	0	0	0	0	0	0	0	1	0	2	21-23 febbraio		1	2	3	4	5	6	7	8	9	10	11	12	13	14	15	16	0	0	0	0	21	22	23	24	25	26
137	0	70	8	8	0	0	0	0	0	0	0	0	0	0	0	0	0	0	2	0	2	2-6 marzo		1	2	3	4	5	6	0	0	9	10	11	12	13	14	15	0	0	0	0	0	21	0	23	0	25	26
1458	0	55	8	8	0	0	0	0	0	0	0	0	0	0	0	0	0	0	1	0	2	21-23 febbraio		0	0	0	0	0	0	0	0	0	0	0	0	0	0	0	0	0	0	0	0	0	0	0	0	0	0
2134	0	42	8	8	0	0	0	0	0	0	0	0	0	0	0	0	0	0	2	0	2	21-23 febbraio		0	0	0	0	0	0	0	0	0	0	0	0	0	0	0	0	0	0	0	0	0	0	0	0	0	0
2524	0	57	8	8	0	0	0	0	0	0	0	0	0	0	0	0	0	0	1	0	2	2-6 marzo		1	2	3	4	0	6	0	0	9	10	0	12	13	14	0	16	0	0	0	0	0	0	0	24	25	26
728	0	58	8	8	0	0	0	0	0	0	0	0	0	0	0	0	0	0	1	0	2	2-6 marzo		1	2	3	4	5	6	0	0	0	0	11	12	13	14	0	16	0	0	0	0	0	22	0	0	25	26
1507	1	45	8	8	0	0	0	0	0	0	0	0	0	0	0	0	0	0	1	0	2	2-6 marzo		0	2	3	4	5	6	0	0	9	10	11	0	13	14	0	0	17	0	0	0	0	0	23	24	25	26
79	0	69	8	8	0	0	0	0	0	0	0	0	0	0	0	0	0	0	1	0	2	7-14 marzo		1	2	0	4	5	6	0	0	9	10	11	0	13	0	15	0	0	0	0	0	21	0	0	24	25	26
294	1	25	8	8	0	0	0	0	0	0	0	0	0	0	0	0	0	0	2	0	2	7-14 marzo		1	2	0	4	5	6	0	0	9	10	11	12	13	14	0	0	0	0	0	0	21	22	23	0	25	26
749	0	60	8	8	0	0	0	0	0	0	0	0	0	0	0	0	0	0	2	0	2	2-6 marzo		1	2	0	4	0	6	0	0	9	10	11	12	13	0	0	0	17	0	0	0	21	22	0	0	25	26
528	0	64	8	8	0	0	0	0	0	0	0	0	0	0	0	0	0	0	1	0	2	2-6 marzo		1	2	3	4	5	6	7	8	9	10	11	12	13	14	0	0	17	0	0	0	21	22	0	0	25	26
2958	0	54	9	9	0	0	0	0	0	0	0	0	0	0	0	0	0	0	1	0	2	21-23 febbraio		1	2	0	4	5	6	0	0	9	10	11	12	13	14	0	16	17	0	0	0	21	22	23	0	25	26
96	1	58	13	9	0	0	0	0	0	0	0	0	0	0	0	0	0	0	3	0	2	21-23 febbraio	7-14 marzo	0	2	0	4	0	6	0	0	0	10	0	0	0	0	0	0	0	0	0	0	0	22	0	0	25	0
3294	0	65	13	1	0	0	0	0	0	0	0	0	0	0	0	0	0	0	2	0	2	7-14 marzo		1	0	3	4	5	6	0	8	9	10	11	12	13	14	15	0	0	0	0	0	21	0	23	0	25	26
2197	1	37	4	4	0	0	0	0	0	0	0	0	0	0	0	0	0	0	1	0	2	7-14 marzo		1	2	3	4	5	6	7	0	9	10	11	12	13	14	0	0	0	0	0	0	21	22	0	0	25	0
2486	0	32	4	4	0	0	0	0	0	0	0	0	0	0	0	0	0	0	2	0	2	7-14 marzo		1	2	3	0	5	0	0	0	9	10	0	12	13	14	15	0	0	0	0	0	0	0	0	0	25	0
648	0	34	4	4	0	0	0	0	0	0	0	0	0	0	0	0	0	0	1	0	2	7-14 marzo		1	2	3	4	5	0	0	0	9	10	11	12	13	14	0	16	0	0	0	0	21	0	0	24	25	26
3253	0	35	4	7	0	0	0	0	0	0	0	0	0	0	0	0	0	0	1	0	2	2-6 marzo		1	2	0	0	0	6	0	0	9	0	0	12	0	0	15	0	0	0	0	0	21	22	0	0	25	26
3418	0	59	7	7	0	0	0	0	0	0	0	0	0	0	0	0	0	0	2	0	2	2-6 marzo		1	2	3	4	5	6	0	0	9	10	0	12	13	14	15	0	0	0	0	0	21	0	0	24	25	26
1426	0	60	7	7	0	0	0	0	0	0	0	0	0	0	0	0	0	0	3	0	2	24 febbraio - 1 marzo		1	0	0	0	0	0	0	0	0	0	0	0	0	0	0	0	0	0	0	0	0	0	0	0	0	0
1977	0	60	7	7	0	0	0	0	0	0	0	0	0	0	0	0	0	0	2	0	2	7-14 marzo		1	0	0	0	0	6	0	0	0	10	0	0	13	14	0	0	0	0	0	0	0	0	0	0	25	26
119	0	60	7	8	0	0	0	0	0	0	0	0	0	0	0	0	0	0	1	0	2	21-23 febbraio		0	0	3	0	0	0	7	0	9	10	11	12	0	14	0	16	0	0	0	20	21	0	23	0	25	0
1648	0	38	7	7	0	0	0	0	0	0	0	0	0	0	0	0	0	0	1	0	2	2-6 marzo		1	2	3	4	5	6	7	8	9	10	0	12	13	14	15	16	0	18	0	0	21	22	0	0	25	26
3674	0	43	7	7	0	0	0	0	0	0	0	0	0	0	0	0	0	0	1	0	2	7-14 marzo		1	2	3	4	5	6	0	0	0	10	0	12	13	0	0	16	0	0	0	0	21	0	0	24	0	26
735	0	35	7	7	0	0	0	0	0	0	0	0	0	0	0	0	0	0	1	0	2	24 febbraio - 1 marzo		1	0	3	4	0	6	0	0	9	10	0	12	0	0	0	16	0	0	0	0	21	22	0	0	25	0
3192	0	36	7	7	0	0	0	0	0	0	0	0	0	0	0	0	0	0	1	0	2	2-6 marzo		1	2	3	4	5	6	0	8	9	10	0	12	13	14	0	0	0	18	0	0	21	0	0	24	25	26
2279	1	51	7	7	0	0	0	0	0	0	0	0	0	0	0	0	0	0	2	0	2	7-14 marzo		1	2	0	4	5	0	0	0	0	10	11	12	0	0	0	16	0	0	0	0	21	0	0	24	25	26
674	1	29	10	3	0	0	0	0	0	0	0	0	0	0	0	0	0	0	1	0	2	7-14 marzo		1	2	0	4	5	6	7	8	9	10	0	12	13	14	0	16	0	18	0	0	21	0	0	24	25	26
2881	0	52	10	10	0	0	0	0	0	0	0	0	0	0	0	0	0	0	1	0	2	dopo il 14 marzo		1	2	3	4	5	0	0	0	9	10	11	12	13	14	0	16	0	0	0	0	21	22	0	24	25	26
505	0	42	10	10	0	0	0	0	0	0	0	0	0	0	0	0	0	0	2	0	2	24 febbraio - 1 marzo		1	2	3	4	5	6	7	8	9	10	11	12	13	14	0	0	0	0	19	0	21	0	0	24	25	26
2714	0	68	3	3	0	0	0	0	0	0	0	0	0	0	0	0	0	0	2	0	2	7-14 marzo		1	2	0	4	5	6	0	0	9	10	0	12	13	14	15	16	0	0	0	0	0	22	0	24	25	26
2401	1	27	3	1	1	2	0	4	0	0	0	0	0	0	11	0	0	14	1	0	2	7-14 marzo		1	2	3	4	0	6	7	8	9	10	11	12	13	14	0	0	0	0	0	0	0	22	0	0	25	26
227	0	40	3	3	0	0	0	0	0	0	0	0	0	0	0	0	0	0	2	0	2	2-6 marzo		1	2	3	4	5	6	7	8	9	10	11	12	13	14	15	0	0	0	0	0	21	22	0	0	25	26
172	0	63	3	3	0	0	0	0	0	0	0	0	0	0	0	0	0	0	1	0	2	dopo il 14 marzo		1	2	3	4	5	6	7	8	9	10	11	12	13	14	15	0	0	0	0	0	21	22	0	24	25	26
109	0	51	3	10	0	0	0	0	0	0	0	0	0	0	0	0	0	0	1	0	2	7-14 marzo		1	2	3	0	5	0	0	0	9	10	0	12	13	0	15	16	0	0	0	0	21	0	0	24	25	26
3119	0	50	3	3	0	0	0	0	0	0	0	0	0	0	0	0	0	0	2	0	2	7-14 marzo		1	2	3	4	5	0	7	8	9	0	0	12	13	14	15	16	0	0	0	0	21	22	0	24	25	26
3538	0	61	3	3	0	0	0	0	0	0	0	0	0	0	0	0	0	0	2	0	2	21-23 febbraio		1	2	0	4	5	6	7	8	9	10	11	12	13	14	0	16	0	0	0	0	21	0	0	24	25	26
1492	0	36	3	8	1	2	3	0	0	0	0	0	9	10	0	0	0	0	1	0	2	7-14 marzo		1	2	3	4	5	6	0	0	9	10	11	12	13	14	15	16	0	0	0	0	21	0	0	24	25	0
2509	1	27	3	3	0	0	0	0	0	0	0	0	0	0	0	0	0	0	2	0	2	7-14 marzo		1	2	3	4	5	6	0	0	9	10	11	12	13	14	0	0	0	0	19	0	21	22	0	24	25	26
3726	1	31	3	3	0	0	0	0	0	0	0	0	0	0	0	0	0	0	2	0	2	2-6 marzo		1	2	3	4	5	6	0	0	9	10	0	12	13	14	0	16	17	0	0	0	21	22	23	0	25	26
1385	0	44	3	3	0	0	0	0	0	0	0	0	0	0	0	0	0	0	1	0	2	21-23 febbraio		1	2	3	4	5	6	7	8	9	10	11	12	13	14	15	16	17	18	19	20	21	22	23	24	25	26
2679	0	50	3	3	0	0	0	0	0	0	0	0	0	0	0	0	0	0	1	0	2	dopo il 14 marzo		1	2	0	4	5	6	0	0	0	0	0	12	13	0	15	0	0	18	0	0	21	22	0	24	25	26
1806	0	57	3	3	0	0	0	0	0	0	0	0	0	0	0	0	0	0	2	0	2	21-23 febbraio		1	2	3	4	0	6	0	0	9	10	0	12	13	0	15	0	0	0	0	0	0	22	0	0	0	0
3102	0	63	6	6	1	2	3	4	0	0	0	0	0	10	0	0	0	0	2	0	2	2-6 marzo		1	2	0	4	5	6	0	0	9	0	0	12	13	14	0	0	0	0	0	0	21	22	0	0	25	26
304	0	54	6	6	0	0	0	0	0	0	0	0	0	0	0	0	0	0	1	0	2	2-6 marzo		1	2	3	0	5	6	0	0	9	10	0	12	13	14	0	16	0	0	0	0	21	22	0	24	25	26
1634	0	42	6	6	1	2	3	4	0	6	0	0	0	0	0	0	0	0	1	0	2	7-14 marzo		1	2	0	4	5	6	0	0	9	10	0	12	13	14	0	16	0	0	0	0	21	22	0	0	25	26
3379	0	54	6	6	1	2	0	0	0	6	0	8	9	0	0	0	0	0	2	0	2	7-14 marzo		1	2	3	0	5	6	0	0	9	0	0	12	13	14	0	0	0	0	0	0	21	22	23	0	25	26
1280	0	38	6	6	1	0	0	0	0	6	7	0	0	0	0	0	0	0	1	0	2	2-6 marzo		1	2	0	0	0	0	0	0	0	10	0	12	0	0	0	0	0	0	0	0	21	0	0	24	25	0
630	1	54	6	8	0	0	0	0	0	0	0	0	0	0	0	0	0	0	1	0	2	dopo il 14 marzo		1	2	0	0	0	0	0	0	0	0	0	0	0	0	0	0	0	0	0	0	0	0	23	0	25	0
1443	1	33	6	6	1	0	3	4	0	6	7	0	9	0	0	0	0	0	1	0	2	2-6 marzo		1	2	3	4	5	6	0	0	9	10	11	12	0	14	0	16	0	0	0	0	21	0	0	24	25	26
2032	0	66	6	6	0	0	0	0	0	0	0	0	0	0	0	0	0	0	1	0	2	7-14 marzo		1	2	3	4	5	6	0	0	9	10	0	12	13	14	15	0	0	0	0	0	21	22	0	24	25	26
2458	0	59	5	5	0	0	0	0	0	0	0	0	0	0	0	0	0	0	1	0	2	24 febbraio - 1 marzo		1	2	3	4	5	6	7	8	9	10	11	12	0	14	0	16	0	0	0	0	21	0	0	24	25	26
787	1	33	5	5	0	0	0	0	0	0	0	0	0	0	0	0	0	0	2	0	2	7-14 marzo		1	2	0	4	0	6	0	0	9	0	0	12	13	0	0	16	0	0	0	0	0	22	0	0	25	0
1346	0	25	5	5	0	0	0	0	0	0	0	0	0	0	0	0	0	0	2	0	2	2-6 marzo		1	2	3	4	5	6	0	0	9	10	11	12	0	14	0	16	0	0	0	0	21	22	0	24	25	26
2341	1	33	5	5	1	2	3	4	0	0	7	0	0	10	11	12	13	0	1	0	2	7-14 marzo		1	2	3	0	5	6	7	0	9	10	0	12	13	14	0	16	0	0	0	0	21	0	23	0	25	26
2818	0	64	5	5	0	0	0	0	0	0	0	0	0	0	0	0	0	0	1	0	2	7-14 marzo		1	2	0	0	0	6	0	0	0	0	0	12	0	0	0	16	0	0	0	0	21	0	0	24	0	26
3383	0	35	5	5	1	2	3	4	5	0	7	0	9	10	0	0	0	0	1	0	2	7-14 marzo		1	2	3	4	5	6	0	0	9	10	11	12	13	14	0	16	17	0	0	0	21	22	23	24	25	26
248	1	28	5	5	0	0	0	0	0	0	0	0	0	0	0	0	0	0	1	0	2	7-14 marzo		1	2	0	4	5	6	0	0	0	10	0	12	13	14	0	0	0	0	0	0	21	0	0	24	25	0
1664	1	44	5	5	0	0	0	0	0	0	0	0	0	0	0	0	0	0	1	0	2	dopo il 14 marzo		0	2	0	4	5	6	0	0	0	0	0	12	0	0	0	0	0	0	0	0	0	22	0	0	25	0
3344	0	61	5	5	1	0	3	0	0	0	0	0	0	10	0	0	0	0	2	0	2	7-14 marzo		1	2	3	4	5	6	0	0	9	0	0	12	13	14	0	0	17	0	0	0	21	0	23	0	25	26
35	0	62	2	2	0	0	0	0	0	0	0	0	0	0	0	0	0	0	1	0	2	21-23 febbraio		1	0	3	4	5	6	7	8	9	10	11	12	13	14	15	0	0	0	0	0	21	22	23	0	25	26
1936	1	64	11	11	0	0	0	0	0	0	0	0	0	0	0	0	0	0	1	0	2	2-6 marzo		1	2	0	4	5	6	0	0	9	0	0	12	13	14	0	16	0	0	0	0	21	22	0	0	25	26
1179	0	69	11	11	0	0	0	0	0	0	0	0	0	0	0	0	0	0	1	0	2	24 febbraio - 1 marzo		1	2	0	4	0	6	0	0	9	10	11	12	0	14	0	16	0	0	0	0	21	22	0	0	25	26
2579	1	27	11	11	1	2	0	4	0	0	0	0	0	0	0	0	0	14	1	0	2	2-6 marzo		1	2	3	4	5	6	7	8	9	10	11	12	13	14	0	16	0	0	0	0	21	22	23	24	25	26
663	0	37	11	11	0	0	0	0	0	0	0	0	0	0	0	0	0	0	1	0	2	7-14 marzo		0	2	0	4	5	6	0	0	9	10	0	0	13	0	0	0	0	0	0	0	21	0	0	0	25	0
3774	0	26	11	11	1	0	0	0	0	0	0	0	0	0	0	12	13	0	1	0	2	7-14 marzo		1	2	0	4	5	0	0	0	9	10	0	12	13	14	0	16	0	0	0	0	21	0	0	0	25	26
3382	0	29	9	9	0	0	0	0	0	0	0	0	0	0	0	0	0	0	1	0	2	24 febbraio - 1 marzo		1	2	0	4	5	6	0	0	9	10	11	12	0	0	0	16	0	0	0	20	0	22	0	0	0	26
1816	0	65	9	9	0	0	0	0	0	0	0	0	0	0	0	0	0	0	2	0	2	7-14 marzo		1	2	0	4	5	6	0	0	0	10	0	12	13	0	15	0	0	18	0	0	21	22	0	0	25	26
3614	1	58	9	9	0	0	0	0	0	0	0	0	0	0	0	0	0	0	3	0	2	21-23 febbraio		1	2	3	4	5	6	0	0	0	0	0	12	13	0	0	0	0	0	0	0	21	22	23	0	25	26
3005	0	62	13	13	0	0	0	0	0	0	0	0	0	0	0	0	0	0	1	0	2	24 febbraio - 1 marzo		1	0	0	4	5	0	0	0	9	10	0	12	0	14	0	0	0	18	0	0	21	0	0	24	25	26
1430	0	50	13	12	0	0	0	0	0	0	0	0	0	0	0	0	0	0	1	0	2	21-23 febbraio		1	2	3	4	5	0	0	0	9	10	11	12	13	0	0	0	0	0	19	0	21	0	23	0	25	26
1832	0	46	13	5	0	0	0	0	0	0	0	0	0	0	0	0	0	0	1	0	2	24 febbraio - 1 marzo		1	2	3	4	5	6	0	0	9	0	0	12	13	14	0	16	0	0	0	0	21	0	0	24	0	26
1304	1	36	12	12	0	0	0	0	0	0	0	0	0	0	0	0	0	0	2	0	2	7-14 marzo		1	2	0	0	5	0	0	0	9	10	0	0	13	0	15	16	0	0	0	0	0	22	23	0	0	26
688	0	44	13	4	0	0	0	0	0	0	0	0	0	0	0	0	0	0	1	0	2	2-6 marzo		1	2	3	4	5	6	7	8	9	10	11	12	13	0	15	16	0	0	0	0	0	0	0	24	25	26
3148	1	28	13	1	0	0	0	0	0	0	0	0	0	0	0	0	0	0	2	0	2	24 febbraio - 1 marzo		1	2	3	4	0	6	0	0	9	10	0	12	0	14	15	0	0	0	0	0	21	0	0	24	25	26
1393	1	40	13	9	0	0	0	0	0	0	0	0	0	0	0	0	0	0	1	0	2	24 febbraio - 1 marzo		0	2	3	0	0	6	7	0	0	0	0	12	13	0	0	0	0	0	0	0	0	0	0	0	0	0
2946	1	50	13	1	0	0	0	0	0	0	0	0	0	0	0	0	0	0	2	0	2	2-6 marzo		1	0	3	0	0	0	0	0	0	10	11	12	13	0	15	0	0	0	0	0	21	22	0	0	25	0
87	0	31		1	1	2	0	4	0	6	7	0	0	10	0	0	13	0	2	0	2	7-14 marzo		1	2	3	4	5	6	0	0	9	10	0	12	13	14	15	16	0	0	0	0	21	22	23	24	25	26
657	0	63		1	0	0	0	0	0	0	0	0	0	0	0	0	0	0	2	0	2	2-6 marzo		1	2	3	4	5	0	0	0	9	10	11	12	13	14	15	16	0	0	0	0	21	22	23	0	25	26
2819	0	46	1	1	0	0	0	0	0	0	0	0	0	0	0	0	0	0	1	0	2	24 febbraio - 1 marzo		1	2	3	4	5	6	0	0	9	10	11	12	13	14	0	0	0	0	0	20	21	0	0	24	25	26
3286	0	55	1	1	0	0	0	0	0	0	0	0	0	0	0	0	0	0	1	0	2	21-23 febbraio		1	2	0	4	5	6	7	8	9	10	11	0	13	14	15	0	0	0	0	0	21	0	0	24	25	26
1948	0	63	1	1	0	0	0	0	0	0	0	0	0	0	0	0	0	0	1	0	2	21-23 febbraio		1	2	3	4	5	6	7	8	9	10	0	12	13	0	15	0	0	0	0	0	21	0	23	0	25	26
1924	0	64	1	1	0	0	0	0	0	0	0	0	0	0	0	0	0	0	1	0	2	2-6 marzo		1	2	3	4	5	6	0	8	0	10	11	12	13	14	0	16	0	0	0	0	21	22	23	0	25	26
3067	1	35	1	1	0	0	0	0	0	0	0	0	0	0	0	0	0	0	1	0	2	7-14 marzo		0	0	0	0	0	0	0	0	0	0	0	0	0	0	0	0	0	0	0	0	0	0	0	0	0	0
2920	0	51	1	1	0	0	0	0	0	0	0	0	0	0	0	0	0	0	1	0	2	7-14 marzo		1	0	0	4	5	0	0	0	9	10	0	12	13	14	0	16	0	0	0	0	21	22	0	0	25	0
633	0	49	1	1	0	0	0	0	0	0	0	0	0	0	0	0	0	0	1	0	2	2-6 marzo		1	2	3	4	5	6	0	8	9	10	11	12	13	14	15	16	0	0	0	0	21	0	0	24	25	26
3240	0	31	1	1	0	0	0	0	0	0	0	0	0	0	0	0	0	0	1	0	2	24 febbraio - 1 marzo		0	0	0	0	0	0	0	0	0	0	0	0	0	0	0	0	0	0	0	0	0	0	0	0	0	0
2746	0	54	1	1	0	0	0	0	0	0	0	0	0	0	0	0	0	0	1	0	2	7-14 marzo		0	2	0	0	0	6	0	0	0	0	11	12	13	0	0	16	0	0	0	0	21	0	23	24	25	26
1223	0	62	1	1	0	0	0	0	0	0	0	0	0	0	0	0	0	0	1	0	2	7-14 marzo		1	2	3	4	5	6	7	8	9	10	11	12	13	14	0	0	0	0	0	0	21	0	0	24	25	26
437	0	36	1	1	0	0	0	0	0	0	0	0	0	0	0	0	0	0	1	0	2	7-14 marzo		1	2	0	4	0	6	0	0	0	0	0	0	13	14	0	16	0	0	0	0	0	0	0	0	25	0
1438	0	42	1	1	0	0	0	0	0	0	0	0	0	0	0	0	0	0	1	0	2	7-14 marzo		1	2	0	4	5	6	7	8	9	10	11	12	13	14	15	0	0	0	0	0	21	0	0	24	25	26
485	0	62	1	1	0	0	0	0	0	0	0	0	0	0	0	0	0	0	1	0	2	7-14 marzo		0	2	3	0	0	6	0	0	9	0	0	0	0	14	0	0	0	0	0	20	0	0	0	24	25	26
2077	0	65	1	1	0	0	0	0	0	0	0	0	0	0	0	0	0	0	1	0	2	24 febbraio - 1 marzo		1	2	0	4	5	0	0	0	0	0	0	12	13	14	0	16	0	0	0	0	21	0	0	24	25	26
1992	0	54	1	1	0	0	0	0	0	0	0	0	0	0	0	0	0	0	1	0	2	21-23 febbraio		1	2	0	4	5	6	0	0	0	10	0	12	0	14	0	0	0	0	0	0	21	0	0	24	25	0
774	1	59	1	1	0	0	0	0	0	0	0	0	0	0	0	0	0	0	1	0	2	7-14 marzo		1	2	3	4	5	6	0	0	9	10	0	12	13	14	0	16	0	0	19	0	21	0	0	24	25	26
923	0	51	1	1	0	0	0	0	0	0	0	0	0	0	0	0	0	0	1	0	2	2-6 marzo		0	2	3	4	5	6	7	8	9	10	0	12	13	14	15	16	0	0	0	0	0	0	23	24	25	26
1969	0	43	1	1	0	0	0	0	0	0	0	0	0	0	0	0	0	0	1	0	2	7-14 marzo		0	2	0	4	5	6	0	0	9	10	0	0	13	14	0	16	0	0	0	0	21	0	0	24	25	26
266	0	63	1	1	0	0	0	0	0	0	0	0	0	0	0	0	0	0	1	0	2	21-23 febbraio		0	2	0	4	5	6	7	0	9	10	11	12	13	14	15	0	0	0	0	0	0	22	0	24	25	26
2459	0	28	1	1	0	0	0	0	0	0	0	0	0	0	0	0	0	0	1	0	2	2-6 marzo		1	2	3	4	5	6	0	0	9	10	0	12	13	0	15	0	0	0	0	0	21	0	0	24	25	26
3174	0	30	1	1	0	0	0	0	0	0	0	0	0	0	0	0	0	0	1	0	2	2-6 marzo		1	2	3	4	5	6	7	8	9	10	11	12	13	14	0	16	0	0	0	0	21	0	23	24	25	26
1994	1	38	1	1	0	0	0	0	0	0	0	0	0	0	0	0	0	0	1	0	2	2-6 marzo		1	0	3	4	5	6	0	0	9	0	0	12	13	14	0	16	0	18	0	0	21	22	0	0	25	26
3430	1	39	1	1	0	0	0	0	0	0	0	0	0	0	0	0	0	0	1	0	2	7-14 marzo		1	2	3	4	5	6	0	0	9	10	0	12	13	0	15	16	0	0	0	0	21	0	23	24	25	26
2853	1	44	1	1	0	0	0	0	0	0	0	0	0	0	0	0	0	0	1	0	2	2-6 marzo		1	2	3	4	5	6	0	0	9	10	11	12	13	14	0	16	0	0	0	0	21	0	23	24	25	26
2980	0	53	1	1	0	0	0	0	0	0	0	0	0	0	0	0	0	0	1	0	2	7-14 marzo		1	2	3	4	5	6	7	0	9	10	11	12	13	14	0	16	0	0	0	0	21	0	0	24	25	26
2952	1	53	1	1	0	0	0	0	0	0	0	0	0	0	0	0	0	0	1	0	2	2-6 marzo		1	2	3	4	5	6	0	0	9	0	0	12	13	14	0	16	17	0	0	0	21	22	0	24	25	26
1391	0	65	1	1	0	0	0	0	0	0	0	0	0	0	0	0	0	0	1	0	2	7-14 marzo		1	2	3	4	5	6	7	0	9	10	11	12	13	14	0	16	0	0	0	0	21	0	23	0	0	26
3	0	46	1	1	0	0	0	0	0	0	0	0	0	0	0	0	0	0	1	0	2	7-14 marzo		1	2	3	4	5	6	0	0	0	10	0	12	0	14	0	16	0	0	0	0	21	0	0	24	25	26
2033	0	58	1	1	0	0	0	0	0	0	0	0	0	0	0	0	0	0	1	0	2	7-14 marzo		1	2	3	4	5	6	0	0	9	10	11	12	13	14	0	16	0	0	0	0	21	22	0	0	25	26
289	0	64	1	1	0	0	0	0	0	0	0	0	0	0	0	0	0	0	1	0	2	7-14 marzo		0	0	0	0	0	0	0	0	0	0	0	0	0	0	0	0	0	0	0	0	0	0	0	0	0	0
1033	0	59	1	1	0	0	0	0	0	0	0	0	0	0	0	0	0	0	1	0	2	dopo il 14 marzo		0	0	0	0	5	0	0	0	9	10	0	0	0	0	0	16	0	0	0	0	0	0	0	0	0	0
3821	0	58	1	1	0	0	0	0	0	0	0	0	0	0	0	0	0	0	1	0	2	2-6 marzo		1	2	3	4	5	6	0	0	9	10	0	12	13	14	15	16	0	0	0	0	21	22	23	0	25	26
2259	1	44	1	1	0	0	0	0	0	0	0	0	0	0	0	0	0	0	1	0	2	7-14 marzo		1	2	3	4	5	6	0	0	9	10	0	12	13	14	0	0	17	0	0	0	21	22	0	24	25	26
995	0	47	1	1	0	0	0	0	0	0	0	0	0	0	0	0	0	0	1	0	2	2-6 marzo		1	2	0	4	5	6	0	0	9	0	11	12	13	14	15	0	0	0	0	0	21	22	0	24	25	26
1771	0	71	1	1	0	0	0	0	0	0	0	0	0	0	0	0	0	0	1	0	2	7-14 marzo		0	2	3	0	0	6	0	0	9	10	0	12	13	14	0	16	0	0	0	0	21	0	23	0	25	26
3471	0	39	1	1	0	0	0	0	0	0	0	0	0	0	0	0	0	0	1	0	2	2-6 marzo		1	2	3	4	5	6	7	8	0	10	0	12	13	0	0	16	0	0	0	0	21	0	0	24	25	26
3638	0	29	1	1	0	0	0	0	0	0	0	0	0	0	0	0	0	0	1	0	2	7-14 marzo		1	2	3	4	5	6	0	0	9	10	0	12	13	14	0	16	0	0	0	0	21	22	23	0	25	26
3570	0	52	1	1	0	0	0	0	0	0	0	0	0	0	0	0	0	0	1	0	2	2-6 marzo		0	2	3	4	5	6	0	0	9	10	0	12	13	14	15	16	0	0	0	0	21	0	0	24	25	26
344	1	52	1	1	0	0	0	0	0	0	0	0	0	0	0	0	0	0	1	0	2	2-6 marzo	7-14 marzo	1	2	0	0	5	6	0	0	9	0	0	12	13	14	0	16	0	0	0	0	0	0	0	24	25	26
2050	0	61	1	1	0	0	0	0	0	0	0	0	0	0	0	0	0	0	1	0	2	7-14 marzo		1	2	3	0	5	6	7	0	9	10	11	12	13	14	15	16	0	18	0	0	21	22	0	24	25	26
2750	0	67	1	1	0	0	0	0	0	0	0	0	0	0	0	0	0	0	1	0	2	24 febbraio - 1 marzo		1	2	3	4	5	6	7	0	9	0	11	12	13	14	0	0	0	0	0	20	21	0	0	24	25	26
770	0	64	1	1	0	0	0	0	0	0	0	0	0	0	0	0	0	0	1	0	2	24 febbraio - 1 marzo		1	2	3	4	5	0	0	8	9	10	11	12	13	14	0	16	0	0	0	0	0	22	23	0	25	26
88	0	68	1	1	0	0	0	0	0	0	0	0	0	0	0	0	0	0	1	0	2	24 febbraio - 1 marzo		1	2	3	4	5	6	0	0	9	0	11	12	13	14	0	16	0	0	0	0	21	0	23	0	25	26
216	0	59	1	1	0	0	0	0	0	0	0	0	0	0	0	0	0	0	1	0	2	21-23 febbraio		1	0	3	4	5	6	7	8	9	10	11	12	13	14	0	0	0	18	0	0	21	0	0	24	25	26
1187	0	71	1	1	0	0	0	0	0	0	0	0	0	0	0	0	0	0	1	0	2	2-6 marzo		0	2	0	4	5	0	0	0	0	10	11	12	13	14	0	16	0	0	0	0	0	0	23	24	25	26
1435	1	27	1	1	0	0	0	0	0	0	0	0	0	0	0	0	0	0	1	0	2	7-14 marzo	24 febbraio - 1 marzo	1	2	3	4	5	6	0	0	9	10	0	12	0	14	15	16	0	0	0	0	21	22	0	0	25	26
393	0	45	1	1	0	0	0	0	0	0	0	0	0	0	0	0	0	0	2	0	2	2-6 marzo		1	2	3	4	5	6	7	0	9	10	11	12	13	0	0	0	17	0	0	0	21	0	0	24	25	26
1931	0	39	1	1	0	0	0	0	0	0	0	0	0	0	0	0	0	0	1	0	2	7-14 marzo		0	2	0	0	5	6	0	0	9	10	0	12	0	0	15	16	0	0	0	0	21	0	0	24	25	0
1907	0	29	1	1	0	0	0	0	0	0	0	0	0	0	0	0	0	0	1	0	2	7-14 marzo		0	2	0	4	5	6	0	0	9	10	0	12	13	14	0	16	0	0	0	0	21	22	0	0	25	26
2084	0	40	1	1	0	0	0	0	0	0	0	0	0	0	0	0	0	0	1	0	2	24 febbraio - 1 marzo		1	2	0	4	5	6	0	0	9	0	11	12	13	14	15	0	0	0	0	0	21	0	0	24	25	26
2079	0	33	1	1	0	0	0	0	0	0	0	0	0	0	0	0	0	0	1	0	2	7-14 marzo		1	2	3	4	5	6	0	0	9	10	11	0	13	0	0	0	0	0	0	0	0	0	0	24	25	0
1051	0	41	1	1	0	0	0	0	0	0	0	0	0	0	0	0	0	0	1	0	2	7-14 marzo		1	2	0	4	5	6	0	0	9	10	0	12	13	0	15	0	0	0	0	0	21	0	0	24	25	26
3601	0	34	1	1	0	0	0	0	0	0	0	0	0	0	0	0	0	0	1	0	2	2-6 marzo		1	2	3	4	5	6	0	0	0	10	0	12	13	14	0	0	17	0	0	0	21	22	23	24	25	26
3086	0	58	1	1	0	0	0	0	0	0	0	0	0	0	0	0	0	0	1	0	2	dopo il 14 marzo		1	2	3	4	5	6	0	0	9	10	11	12	13	14	15	16	0	0	0	0	21	0	0	24	25	26
1133	0	50	1	1	0	0	0	0	0	0	0	0	0	0	0	0	0	0	1	0	2	21-23 febbraio		1	2	3	4	5	6	7	8	9	10	11	12	13	14	0	0	0	0	0	0	21	0	0	24	25	26
1197	0	50	1	1	0	0	0	0	0	0	0	0	0	0	0	0	0	0	1	0	2	24 febbraio - 1 marzo		1	2	3	4	5	6	0	0	9	10	0	12	13	0	15	0	0	0	0	0	0	0	0	24	25	26
2105	0	43	1	1	0	0	0	0	0	0	0	0	0	0	0	0	0	0	1	0	2	7-14 marzo		0	2	0	0	0	6	7	8	9	10	0	12	0	14	0	16	0	0	0	0	21	0	0	24	25	26
2682	1	52	1	1	0	0	0	0	0	0	0	0	0	0	0	0	0	0	1	0	2	24 febbraio - 1 marzo		1	2	3	4	5	6	7	0	9	0	0	12	13	0	0	16	0	0	0	0	21	22	0	0	25	26
3295	1	56	1	1	0	0	0	0	0	0	0	0	0	0	0	0	0	0	1	0	2	7-14 marzo		1	2	0	4	5	6	0	0	9	10	0	12	13	0	0	16	0	0	0	0	21	22	0	0	25	26
3433	0	28	1	1	0	0	0	0	0	0	0	0	0	0	0	0	0	0	1	0	2	7-14 marzo		1	2	3	4	5	6	0	8	0	10	0	12	0	0	0	16	0	0	0	0	21	0	0	24	25	26
1049	0	37	1	1	0	0	0	0	0	0	0	0	0	0	0	0	0	0	1	0	2	2-6 marzo		1	2	0	4	5	6	0	0	9	10	0	12	0	14	0	0	0	0	0	0	21	0	0	24	25	0
1857	0	34	1	1	0	0	0	0	0	0	0	0	0	0	0	0	0	0	1	0	2	2-6 marzo		1	2	0	0	0	6	7	8	9	10	0	12	0	14	0	0	0	0	0	0	0	22	0	24	25	26
3343	1	36	1	1	1	0	0	4	0	0	0	0	0	0	0	0	0	0	1	0	2	7-14 marzo		0	2	3	4	5	6	0	0	9	0	0	12	13	0	15	0	0	0	0	0	21	22	0	24	25	26
1629	0	65	1	1	1	0	3	0	0	0	0	8	9	0	11	0	0	0	1	0	2	24 febbraio - 1 marzo		1	2	0	4	5	6	0	8	9	10	0	12	13	14	15	0	0	0	0	0	21	0	0	24	25	26
1101	0	38	1	1	1	2	0	4	0	6	7	0	9	10	11	0	0	0	1	0	2	dopo il 14 marzo		1	0	3	4	5	6	7	8	9	10	11	12	13	14	0	16	0	0	0	0	21	22	0	24	25	26
1348	0	42	1	1	0	0	0	0	0	0	0	0	0	0	0	0	0	0	1	0	2	21-23 febbraio		1	2	3	4	5	6	0	0	9	10	11	12	13	14	0	16	0	0	0	0	21	0	0	24	25	26
2216	0	42	1	1	0	0	0	0	0	0	0	0	0	0	0	0	0	0	1	0	2	7-14 marzo		1	2	3	4	5	6	7	8	9	10	11	12	13	14	0	0	0	0	0	0	21	22	0	24	25	26
1919	0	43	1	1	0	0	0	0	0	0	0	0	0	0	0	0	0	0	1	0	2	dopo il 14 marzo		0	2	0	4	5	0	0	0	9	0	0	0	0	0	0	0	17	0	0	0	0	0	0	24	25	26
2943	0	68	1	1	0	0	0	0	0	0	0	0	0	0	0	0	0	0	1	0	2	7-14 marzo		0	2	3	4	5	6	0	0	0	10	0	12	13	14	0	16	0	0	0	0	21	22	0	24	25	26
1544	0	43	1	1	0	0	0	0	0	0	0	0	0	0	0	0	0	0	1	0	2	7-14 marzo		1	2	3	4	5	6	0	0	9	10	0	12	13	14	15	0	0	0	0	0	21	22	0	24	25	26
1471	0	68	1	1	0	0	0	0	0	0	0	0	0	0	0	0	0	0	1	0	2	7-14 marzo		1	2	3	4	5	6	0	8	9	0	0	12	13	14	0	16	0	0	0	0	21	22	0	0	25	26
2171	0	34	1	1	0	0	0	0	0	0	0	0	0	0	0	0	0	0	1	0	2	dopo il 14 marzo		1	2	0	4	5	6	0	0	9	10	0	12	13	14	0	0	0	0	0	0	21	22	0	0	25	26
714		47	1	1	0	0	0	0	0	0	0	0	0	0	0	0	0	0	1	0	2	21-23 febbraio		1	2	3	4	5	6	7	0	9	10	11	12	13	14	0	16	0	0	0	0	21	22	0	0	25	26
3278	1	46	1	1	1	2	0	0	5	0	7	0	0	0	11	0	0	0	1	0	2	dopo il 14 marzo		1	2	3	4	5	6	7	0	9	0	0	12	13	14	15	0	0	18	0	0	21	22	23	24	25	26
1899	1	58	1	1	0	0	0	0	0	0	0	0	0	0	0	0	0	0	1	0	2	7-14 marzo		1	2	3	0	5	6	0	0	9	10	0	12	13	14	0	16	0	0	0	0	21	0	23	0	25	26
3598	0	29	1	1	0	0	0	0	0	0	0	0	0	0	0	0	0	0	1	0	2	dopo il 14 marzo		1	2	3	4	5	6	7	8	9	10	11	12	13	14	0	16	0	0	0	0	21	22	0	24	25	26
2267	1	46	1	1	1	2	0	4	0	0	7	0	0	0	0	0	0	0	1	0	2	2-6 marzo		1	2	0	4	5	6	0	0	9	10	11	12	13	14	15	16	0	0	0	0	21	22	23	24	25	26
1441	0	29	1	1	0	0	0	0	0	0	0	0	0	0	0	0	0	0	1	0	2	2-6 marzo		1	2	3	4	5	6	0	8	9	10	11	12	0	14	15	0	0	0	0	0	21	0	0	24	25	26
1814	0	64	1	1	0	0	0	0	0	0	0	0	0	0	0	0	0	0	1	0	2	7-14 marzo		1	2	3	4	5	6	0	0	9	10	11	12	13	14	0	16	0	0	0	0	21	0	0	24	25	26
604	0	49	1	1	1	2	0	4	0	0	0	0	0	10	0	0	0	0	1	0	2	dopo il 14 marzo		1	2	3	4	5	6	0	0	9	10	0	12	13	14	0	16	0	0	0	0	21	22	0	24	25	0
2142	0	62	1	1	0	0	0	0	0	0	0	0	0	0	0	0	0	0	1	0	2	2-6 marzo		1	2	0	4	5	6	0	0	9	10	11	12	0	14	0	0	0	0	19	0	21	22	0	24	0	26
3128	0	46	1	1	0	0	0	0	0	0	0	0	0	0	0	0	0	0	1	0	2	2-6 marzo		1	2	3	0	5	6	7	0	9	10	0	0	13	0	15	0	0	0	0	0	21	22	0	24	25	26
2589	0	61	1	1	0	0	0	0	0	0	0	0	0	0	0	0	0	0	1	0	2	21-23 febbraio		1	2	3	4	5	6	0	0	9	10	11	12	13	14	0	0	0	0	19	0	21	22	0	24	25	26
942	0	33	1	1	0	0	0	0	0	0	0	0	0	0	0	0	0	0	1	0	2	7-14 marzo		1	2	3	4	5	6	0	0	9	0	11	12	13	0	0	0	0	0	19	0	21	0	0	24	25	26
3284	1	41	1	1	0	0	0	0	0	0	0	0	0	0	0	0	0	0	1	0	2	7-14 marzo		1	2	0	4	5	0	0	0	9	10	0	12	13	14	0	0	0	0	0	0	21	0	0	24	25	26
2515	0	32	1	1	0	0	0	0	0	0	0	0	0	0	0	0	0	0	1	0	2	7-14 marzo		1	2	3	4	5	6	0	0	9	0	11	12	13	14	0	16	0	0	0	0	21	0	0	24	25	26
2964	0	57	1	1	0	0	0	0	0	0	0	0	0	0	0	0	0	0	1	0	2	24 febbraio - 1 marzo		1	2	3	4	5	6	0	0	0	0	0	12	0	14	0	16	0	0	0	0	21	0	23	24	25	26
2437	1	50	1	1	0	0	0	0	0	0	0	0	0	0	0	0	0	0	1	0	2	2-6 marzo		0	2	3	0	5	6	0	0	9	0	0	0	0	14	0	16	0	0	0	0	21	0	0	24	25	26
2556	0	56	1	1	0	0	0	0	0	0	0	0	0	0	0	0	0	0	1	0	2	24 febbraio - 1 marzo		1	2	3	4	5	6	7	8	9	10	0	12	13	0	15	16	0	0	0	0	21	0	0	24	25	26
1620	1	46	1	1	0	0	0	0	0	0	0	0	0	0	0	0	0	0	1	0	2	7-14 marzo	7-14 marzo	1	2	3	4	5	6	7	8	9	10	11	12	13	14	0	16	0	0	0	0	21	22	0	24	25	26
3356	0	49	1	1	0	0	0	0	0	0	0	0	0	0	0	0	0	0	1	0	2	7-14 marzo		1	2	3	4	5	6	7	0	9	10	11	12	13	14	0	0	17	0	0	0	21	22	0	0	25	26
582	1	35	1	1	1	2	3	4	0	6	7	0	9	10	0	12	13	0	1	0	2	2-6 marzo		1	2	3	4	5	6	0	0	9	10	11	12	13	14	0	16	0	0	0	0	21	0	0	24	25	26
2954	0	46	1	1	0	0	0	0	0	0	0	0	0	0	0	0	0	0	1	0	2	7-14 marzo		1	0	3	0	0	6	0	0	9	10	11	12	13	14	0	16	0	0	0	0	21	0	0	24	25	26
1613	0	62	1	1	0	0	0	0	0	0	0	0	0	0	0	0	0	0	1	0	2	7-14 marzo		1	2	3	4	5	6	0	8	9	10	0	12	13	14	0	16	0	0	0	0	21	22	0	0	25	26
2697	0	60	1	1	0	0	0	0	0	0	0	0	0	0	0	0	0	0	1	0	2	2-6 marzo		1	0	0	0	0	0	0	0	0	0	0	0	0	0	0	0	0	0	0	0	0	0	0	0	0	0
1300	0	42	1	1	0	0	0	0	0	0	0	0	0	0	0	0	0	0	1	0	2	7-14 marzo		1	2	3	4	5	6	0	0	9	10	0	12	13	14	0	16	0	0	0	0	21	0	0	24	25	26
2022	1	50	1	1	0	0	0	0	0	0	0	0	0	0	0	0	0	0	1	0	2	24 febbraio - 1 marzo		1	2	0	4	5	6	0	0	9	10	0	12	13	14	15	16	0	0	0	0	21	0	0	24	25	26
916	0	59	1	1	0	0	0	0	0	0	0	0	0	0	0	0	0	0	1	0	2	7-14 marzo		1	2	3	4	5	6	7	0	9	10	0	12	13	14	0	16	0	0	0	0	21	0	0	24	25	26
520	0	59	1	1	0	0	0	0	0	0	0	0	0	0	0	0	0	0	1	0	2	dopo il 14 marzo		1	0	0	4	5	6	7	0	9	0	0	12	13	14	15	16	0	0	0	0	21	0	0	24	25	26
3431	0	52	1	1	0	0	0	0	0	0	0	0	0	0	0	0	0	0	1	0	2	2-6 marzo		1	2	3	4	5	6	0	0	9	10	11	12	13	14	15	0	0	0	0	0	21	0	0	24	25	26
3419	0	41	1	1	0	0	0	0	0	0	0	0	0	0	0	0	0	0	1	0	2	dopo il 14 marzo		1	2	3	4	0	6	0	0	9	10	11	12	13	0	15	0	0	0	0	0	21	0	23	24	25	26
3309	1	46	1	1	1	2	3	4	0	6	7	8	9	10	0	0	0	0	1	0	2	2-6 marzo		1	2	3	4	5	6	7	8	9	10	11	12	13	14	15	0	0	0	0	0	21	22	0	0	25	26
1608	0	71	1	1	0	0	0	0	0	0	0	0	0	0	0	0	0	0	1	0	2	2-6 marzo		1	2	0	4	5	6	0	0	9	10	11	12	13	14	0	16	0	0	0	0	21	0	0	24	25	26
101	0	65	1	1	0	0	0	0	0	0	0	0	0	0	0	0	0	0	1	0	2	24 febbraio - 1 marzo		1	2	3	4	5	0	0	0	0	10	0	12	13	14	15	0	0	0	0	0	21	22	0	0	25	26
1251	0	66	1	1	0	0	0	0	0	0	0	0	0	0	0	0	0	0	1	0	2	2-6 marzo		1	2	3	4	5	6	7	8	9	10	11	12	13	14	15	16	0	0	0	0	21	22	23	0	25	26
2365	0	34	1	1	0	0	0	0	0	0	0	0	0	0	0	0	0	0	1	0	2	24 febbraio - 1 marzo		1	2	3	4	5	6	7	8	9	10	11	12	13	14	15	16	0	0	0	0	21	22	23	24	25	26
2508	0	43	1	1	0	0	0	0	0	0	0	0	0	0	0	0	0	0	1	0	2	7-14 marzo		1	2	0	4	5	6	0	0	9	0	11	12	13	14	15	0	0	0	0	0	21	22	0	0	25	26
1920	0	67	1	1	0	0	0	0	0	0	0	0	0	0	0	0	0	0	1	0	2	7-14 marzo		1	2	0	4	5	6	0	0	0	10	0	12	13	14	0	0	0	0	0	0	21	0	0	24	0	26
3580	0	45	1	1	0	0	0	0	0	0	0	0	0	0	0	0	0	0	1	0	2	7-14 marzo		1	2	0	4	5	0	0	0	9	10	0	12	13	14	0	16	0	0	0	0	21	0	0	24	25	26
3602	0	51	1	1	0	0	0	0	0	0	0	0	0	0	0	0	0	0	1	0	2	24 febbraio - 1 marzo		1	2	0	4	5	6	7	8	9	10	11	12	13	14	0	16	0	0	0	0	21	22	23	24	25	26
1953	0	65	1	1	0	0	0	0	0	0	0	0	0	0	0	0	0	0	1	0	2	7-14 marzo		0	2	0	0	0	0	0	0	9	10	0	12	0	14	0	16	0	0	0	0	21	0	0	24	25	26
624	0	68	1	1	0	0	0	0	0	0	0	0	0	0	0	0	0	0	1	0	2	24 febbraio - 1 marzo		1	2	3	4	5	6	0	0	9	10	11	12	13	14	15	16	0	0	0	0	21	22	23	24	25	26
3797	0	32	1	1	0	0	0	0	0	0	0	0	0	0	0	0	0	0	1	0	2	7-14 marzo		1	2	0	4	5	6	7	8	9	10	11	12	13	14	15	0	0	0	0	0	21	0	0	24	25	26
1825	0	63	1	1	0	0	0	0	0	0	0	0	0	0	0	0	0	0	1	0	2	dopo il 14 marzo		0	2	3	4	5	6	0	0	9	0	11	12	13	0	0	0	0	0	19	0	21	22	23	24	25	26
3649	0	61	1	1	0	0	0	0	0	0	0	0	0	0	0	0	0	0	1	0	2	7-14 marzo		0	0	0	0	0	0	0	0	0	0	0	0	0	0	0	0	0	0	0	0	0	0	0	0	0	0
452	1	25	1	1	0	0	0	0	0	0	0	0	0	0	0	0	0	0	1	0	2	7-14 marzo		1	2	3	4	5	6	7	8	9	10	11	12	13	14	15	0	0	0	0	0	21	0	23	0	25	26
3028	1	54	1	1	0	0	0	0	0	0	0	0	0	0	0	0	0	0	1	0	2	dopo il 14 marzo		0	2	3	4	5	6	7	0	0	10	11	12	13	14	15	16	0	0	0	0	21	22	0	0	25	26
2764	0	59	1	1	0	0	0	0	0	0	0	0	0	0	0	0	0	0	1	0	2	21-23 febbraio		1	2	3	0	5	6	0	0	0	0	0	12	0	0	0	16	0	0	0	0	21	0	23	0	25	26
2501	0	62	1	1	0	0	0	0	0	0	0	0	0	0	0	0	0	0	1	0	2	7-14 marzo		1	2	3	4	5	6	7	0	0	0	0	12	13	14	0	16	0	0	0	0	21	22	0	0	25	26
1749	0	65	1	1	0	0	0	0	0	0	0	0	0	0	0	0	0	0	1	0	2	7-14 marzo		0	2	0	4	5	6	0	0	0	10	0	12	13	14	0	16	0	0	0	0	0	0	0	24	25	26
929	0	71	1	1	0	0	0	0	0	0	0	0	0	0	0	0	0	0	1	0	2	dopo il 14 marzo		0	0	3	0	0	0	0	0	9	0	0	12	0	14	0	16	0	0	0	20	0	0	0	24	25	26
2968	0	45	1	1	0	0	0	0	0	0	0	0	0	0	0	0	0	0	1	0	2	2-6 marzo		1	2	3	4	5	6	7	8	9	0	0	12	13	0	0	16	0	0	0	0	0	0	0	24	25	26
2966	1	38	1	1	0	0	0	0	0	0	0	0	0	0	0	0	0	0	1	0	2	7-14 marzo		1	2	3	0	0	6	0	0	9	10	0	12	13	0	0	0	17	0	0	0	0	22	0	0	25	0
2381	0	48	1	1	0	0	0	0	0	0	0	0	0	0	0	0	0	0	1	0	2	dopo il 14 marzo		1	2	3	4	5	6	0	0	9	0	0	12	13	14	0	16	0	0	0	0	21	0	0	24	25	26
3478	0	66	1	1	1	0	0	4	0	0	0	0	0	0	0	0	0	0	1	0	2	dopo il 14 marzo		1	2	3	4	5	6	7	8	9	10	11	12	13	14	15	16	0	0	0	0	0	0	0	0	0	0
142	1	57	1	1	0	0	0	0	0	0	0	0	0	0	0	0	0	0	1	0	2	7-14 marzo		1	2	3	4	5	6	7	8	9	10	11	12	13	14	0	0	0	0	0	0	21	0	0	24	25	26
1314	0	31	1	1	0	0	0	0	0	0	0	0	0	0	0	0	0	0	1	0	2	24 febbraio - 1 marzo		1	2	3	4	5	6	7	8	9	10	0	12	13	14	15	0	0	0	0	0	21	0	0	24	25	26
822	0	60	1	1	0	0	0	0	0	0	0	0	0	0	0	0	0	0	1	0	2	21-23 febbraio		0	2	3	4	5	6	0	0	9	10	0	12	13	14	0	16	0	0	0	0	21	22	0	24	25	26
3357	0	46	1	1	0	0	0	0	0	0	0	0	0	0	0	0	0	0	1	0	2	24 febbraio - 1 marzo		1	2	3	4	5	6	0	0	9	10	11	12	13	14	0	0	0	0	0	0	21	0	0	24	25	26
3636	1	58	1	1	1	0	0	0	0	0	0	0	0	10	0	0	0	14	1	0	2	dopo il 14 marzo		1	2	3	4	5	6	0	0	9	10	11	12	13	14	15	0	0	0	0	0	21	0	0	24	25	26
2178	1	56	1	1	1	0	0	4	0	0	0	0	0	0	11	0	0	0	1	0	2	7-14 marzo		1	2	0	4	5	6	0	0	9	10	0	12	13	14	15	16	0	0	0	0	21	0	23	24	25	26
2195	1	55	1	1	0	0	0	0	0	0	0	0	0	0	0	0	0	0	1	0	2	2-6 marzo		1	2	3	4	5	6	7	8	9	10	11	12	13	14	15	16	0	0	0	0	21	22	0	24	25	26
3594	0	61	1	1	0	0	0	0	0	0	0	0	0	0	0	0	0	0	1	0	2	dopo il 14 marzo		1	2	3	4	5	6	7	0	9	0	11	12	0	14	0	0	0	0	0	20	21	0	0	24	25	26
2562	0	63	1	1	0	0	0	0	0	0	0	0	0	0	0	0	0	0	1	0	2	24 febbraio - 1 marzo		1	2	3	0	5	6	0	0	9	10	0	12	13	0	0	16	0	0	0	0	0	0	0	24	25	26
2227	0	65	1	1	0	0	0	0	0	0	0	0	0	0	0	0	0	0	1	0	2	7-14 marzo		1	2	0	4	5	6	0	0	9	0	0	12	13	14	15	0	0	0	0	0	21	22	0	0	25	26
3693	0	42	1	1	0	0	0	0	0	0	0	0	0	0	0	0	0	0	1	0	2	2-6 marzo		1	2	3	0	0	6	0	0	0	10	0	12	13	0	15	16	0	0	0	0	21	0	0	24	25	26
1584	0	49	1	1	0	0	0	0	0	0	0	0	0	0	0	0	0	0	1	0	2	7-14 marzo		1	2	3	4	0	6	0	0	9	0	11	0	0	0	0	16	0	0	0	0	0	0	0	24	25	26
1802	0	58	1	1	0	0	0	0	0	0	0	0	0	0	0	0	0	0	1	0	2	7-14 marzo		1	2	3	4	5	6	7	8	9	10	11	12	13	14	0	0	17	0	0	0	21	22	0	0	25	26
1767	1	38	1	1	0	0	0	0	0	0	0	0	0	0	0	0	0	0		0	2	7-14 marzo		1	2	3	4	5	0	0	0	9	0	0	12	13	0	15	0	0	0	0	0	21	0	0	24	25	26
2621	0	59	1	1	0	0	0	0	0	0	0	0	0	0	0	0	0	0	1	0	2	7-14 marzo		1	2	0	4	0	6	0	0	9	0	0	12	13	14	0	0	0	0	0	0	21	0	23	24	25	26
1909	0	38	1	1	0	0	0	0	0	0	0	0	0	0	0	0	0	0	1	0	2	7-14 marzo		1	2	3	4	5	6	7	0	9	10	0	12	13	0	15	0	0	0	0	0	21	0	23	0	25	26
884	0	53	1	1	0	0	0	0	0	0	0	0	0	0	0	0	0	0	1	0	2	21-23 febbraio		1	2	3	4	5	6	7	8	9	10	11	12	13	14	0	16	0	0	0	0	21	22	0	24	25	26
1587	1	55	1	1	0	0	0	0	0	0	0	0	0	0	0	0	0	0	1	0	2	dopo il 14 marzo		1	0	0	0	0	6	0	0	0	0	0	12	13	0	0	0	0	0	0	0	21	0	0	24	25	26
3161	1	36	1	1	0	0	0	0	0	0	0	0	0	0	0	0	0	0	1	0	2	7-14 marzo		1	2	3	4	5	6	0	0	9	10	11	12	13	0	0	16	0	0	0	0	21	22	0	24	25	26
1227	0	54	1	1	0	0	0	0	0	6	0	0	0	0	0	0	0	0	1	0	2	7-14 marzo		1	2	3	4	5	6	0	0	9	10	0	12	0	14	0	16	0	0	0	0	21	0	0	24	25	0
1811	0	56	1	1	0	0	0	0	0	0	0	0	0	0	0	0	0	0	1	0	2	2-6 marzo		1	2	3	4	0	6	0	0	9	10	0	12	0	14	0	16	0	0	0	0	21	0	23	24	25	26
3054	0	63	1	1	0	0	0	0	0	0	0	0	0	0	0	0	0	0	1	0	2	24 febbraio - 1 marzo		0	0	0	0	0	0	0	0	0	0	0	0	0	0	0	0	0	0	0	0	0	0	0	0	0	0
2428	0	28	1	1	0	0	0	0	0	0	0	0	0	0	0	0	0	0	1	0	2	7-14 marzo		1	2	3	4	5	6	7	8	9	10	0	12	13	14	0	0	0	0	0	20	21	0	0	24	25	26
2527	0	46	1	1	0	0	0	0	0	0	0	0	0	0	0	0	0	0	1	0	2	7-14 marzo		1	2	3	4	5	6	7	8	9	10	11	12	13	14	15	16	0	0	0	0	21	22	0	0	25	26
2334	1	32	1	1	0	0	0	0	0	0	0	0	0	0	0	0	0	0	1	0	2	7-14 marzo		1	2	3	4	5	6	0	0	9	10	0	12	13	14	0	16	0	0	0	0	21	22	23	24	25	26
3749	0	45	1	1	0	0	0	0	0	0	0	0	0	0	0	0	0	0	1	0	2	21-23 febbraio		1	2	3	4	5	6	0	0	9	10	0	12	13	14	0	16	0	0	0	0	21	22	0	0	25	26
821	1	47	1	1	0	0	0	0	0	0	0	0	0	0	0	0	0	0	1	0	2	7-14 marzo		1	2	0	4	5	6	0	0	9	10	0	12	13	0	0	0	0	0	0	0	21	0	23	0	25	26
3754	1	62	1	1	0	0	0	0	0	0	0	0	0	0	0	0	0	0	1	0	2	7-14 marzo		1	2	3	4	5	6	0	8	9	10	11	12	13	14	0	16	0	0	0	0	21	0	0	24	25	26
1282	0	47	1	1	0	0	0	0	0	0	0	0	0	0	0	0	0	0	1	0	2	7-14 marzo		1	2	3	4	5	6	0	0	9	10	11	12	13	0	0	16	0	0	0	0	21	0	0	24	25	26
3822	0	40	1	1	1	0	3	0	0	0	0	0	9	0	0	0	0	0	1	0	2	2-6 marzo		1	2	3	4	5	0	0	0	9	10	0	12	13	14	0	0	0	0	0	0	0	0	0	0	0	0
3145	0	25	1	1	0	0	0	0	0	0	0	0	0	0	0	0	0	0	1	0	2	dopo il 14 marzo		1	0	0	4	5	0	0	0	9	10	11	12	13	14	15	16	0	0	0	0	21	22	0	24	25	26
1795	0	50	1	1	0	0	0	0	0	0	0	0	0	0	0	0	0	0	1	0	2	7-14 marzo		1	2	3	4	5	6	7	0	9	0	11	12	13	14	0	16	0	0	0	0	21	0	0	24	25	26
2156	1	32	1	1	0	0	0	0	0	0	0	0	0	0	0	0	0	0	1	0	2	7-14 marzo		1	2	0	0	5	6	0	0	9	10	0	12	13	14	0	0	0	0	0	0	21	0	23	0	25	26
2803	0	45	1	1	0	0	0	0	0	0	0	0	0	0	0	0	0	0	1	0	2	24 febbraio - 1 marzo		1	2	3	4	5	6	7	8	0	10	0	12	0	0	0	16	0	0	0	0	21	22	0	0	25	0
2241	0	47	1	1	0	0	0	0	0	0	0	0	0	0	0	0	0	0	1	0	2	7-14 marzo		0	0	0	0	0	6	0	0	0	0	0	12	13	0	15	0	0	0	0	0	0	0	0	24	25	26
591	0	50	1	1	0	0	0	0	0	0	0	0	0	0	0	0	0	0	1	0	2	2-6 marzo		1	0	0	4	5	6	0	0	9	10	11	12	13	14	0	0	17	0	0	0	21	0	0	24	25	26
922	0	55	1	1	0	0	0	0	0	0	0	0	0	0	0	0	0	0	2	0	2	24 febbraio - 1 marzo		1	2	3	4	5	6	7	8	9	10	11	12	13	14	0	0	0	18	0	0	21	0	23	24	25	26
205	0	63	1	1	0	0	0	0	0	0	0	0	0	0	0	0	0	0	1	0	2	2-6 marzo		1	2	3	4	5	6	7	8	9	10	11	12	13	14	0	16	0	0	0	0	21	0	0	24	25	26
2445	0	67	1	1	0	0	0	0	0	0	0	0	0	0	0	0	0	0	1	0	2	21-23 febbraio		1	2	3	4	5	6	0	0	9	10	11	12	13	14	0	0	0	18	0	0	0	22	23	0	25	26
1228	1	37	1	1	0	0	0	0	0	0	0	0	0	0	0	0	0	0	1	0	2	2-6 marzo		1	2	3	4	5	6	0	0	9	10	11	12	13	14	0	0	17	0	0	0	21	22	0	0	25	26
1301	1	27	1	1	0	0	0	0	0	0	0	0	0	0	0	0	0	0	1	0	2			0	0	0	0	0	0	0	0	0	0	0	0	0	0	0	0	0	0	0	0	0	0	0	0	0	0
2182	1	41	1	1	0	0	0	0	0	0	0	0	0	0	0	0	0	0	1	0	2	2-6 marzo		1	2	3	4	5	6	0	0	9	10	11	12	13	14	15	0	0	0	0	0	21	22	0	0	25	26
3608	1	50	1	1	0	0	0	0	0	0	0	0	0	0	0	0	0	0	1	0	2	7-14 marzo		1	2	3	4	5	6	0	0	9	10	11	12	13	0	15	0	0	0	0	0	21	0	0	24	25	26
1416	0	50	1	1	0	0	0	0	0	0	0	0	0	0	0	0	0	0	1	0	2	dopo il 14 marzo		1	2	3	4	0	6	0	0	9	10	11	12	13	14	0	0	17	0	0	0	21	22	0	0	25	26
1075	0	53	1	1	0	0	0	0	0	0	0	0	0	0	0	0	0	0	1	0	2	7-14 marzo		1	2	3	4	5	6	0	0	9	0	11	12	13	14	0	0	17	0	0	0	21	22	0	0	25	26
2932	0	60	1	1	1	2	3	0	0	6	0	0	9	10	0	12	13	14	1	0	2	dopo il 14 marzo		1	2	0	4	5	6	7	0	9	10	11	12	13	14	15	16	0	0	0	0	21	22	0	24	25	26
3077	0	64	1	1	1	2	3	4	0	0	0	0	0	0	0	0	0	0	1	0	2	7-14 marzo		1	0	0	0	0	0	0	0	0	0	0	0	0	0	0	0	0	0	0	0	0	0	0	0	0	0
1934	1	49	1	1	0	0	0	0	0	0	0	0	0	0	0	0	0	0	1	0	2	21-23 febbraio		0	0	0	0	0	0	0	0	0	0	0	0	0	0	0	0	0	0	0	0	0	0	0	0	0	0
3603	1	64	1	1	0	0	0	0	0	0	0	0	0	0	0	0	0	0	1	0	2	24 febbraio - 1 marzo		1	0	3	4	5	6	7	8	9	10	11	12	13	14	0	16	17	0	0	0	21	22	0	0	25	26
3158	0	66	1	1	0	0	0	0	0	0	0	0	0	0	0	0	0	0	1	0	2	24 febbraio - 1 marzo		0	2	0	4	5	6	7	8	9	10	11	12	13	14	15	16	0	0	0	0	21	22	0	0	25	26
2115	0	59	1	1	0	0	0	0	0	0	0	0	0	0	0	0	0	0	1	0	2	7-14 marzo		1	2	3	4	5	6	0	0	9	10	0	12	13	14	15	16	0	0	0	0	21	0	0	24	25	26
924	0	62	1	1	0	0	0	0	0	0	0	0	0	0	0	0	0	0	1	0	2	7-14 marzo		1	2	3	4	5	6	0	0	9	10	0	12	13	14	0	0	0	0	0	0	21	22	0	0	25	26
2419	0	64	1	1	0	0	0	0	0	0	0	0	0	0	0	0	0	0	1	0	2	2-6 marzo		1	2	3	4	5	6	0	0	9	10	11	12	13	14	0	16	0	0	0	0	21	0	0	24	25	26
1856	0	28	1	1	0	0	0	0	0	0	0	0	0	0	0	0	0	0	1	0	2	2-6 marzo		1	2	0	4	5	6	0	0	9	10	0	0	13	0	0	16	0	0	0	0	0	22	0	24	25	26
2585	0	42	1	1	0	0	0	0	0	0	0	0	0	0	0	0	0	0	1	0	2	7-14 marzo		1	2	3	4	5	6	0	0	9	10	0	12	13	14	15	16	0	0	0	0	21	0	23	0	25	0
2303	0	57	1	1	0	0	0	0	0	0	0	0	0	0	0	0	0	0	1	0	2	24 febbraio - 1 marzo		1	2	3	4	5	6	0	0	9	10	11	12	13	14	0	0	17	0	0	0	21	0	0	24	25	26
2773	0	61	1	1	0	0	0	0	0	0	0	0	0	0	0	0	0	0	1	0	2	21-23 febbraio		0	2	0	4	5	6	0	0	0	0	0	12	13	14	0	0	0	0	0	0	21	22	0	0	25	0
3126	0	55	1	1	1	0	3	4	0	6	7	0	9	10	0	0	0	0	1	0	2	24 febbraio - 1 marzo		1	2	0	4	5	6	0	0	9	0	11	12	13	14	15	16	0	0	0	0	21	0	23	0	25	26
2387	0	71	1	1	0	0	0	0	0	0	0	0	0	0	0	0	0	0	1	0	2	21-23 febbraio		1	2	3	4	5	6	0	0	9	0	0	12	13	14	15	0	0	0	0	0	21	22	23	0	25	26
2018	0	60	1	1	0	0	0	0	0	0	0	0	0	0	0	0	0	0	1	0	2	7-14 marzo		0	2	3	4	5	0	0	0	9	10	0	12	13	14	0	16	0	0	0	0	0	0	0	24	25	0
3577	0	68	1	1	0	0	0	0	0	0	0	0	0	0	0	0	0	0	1	0	2	2-6 marzo		1	2	0	0	0	6	0	0	9	10	0	12	0	14	0	16	0	0	0	0	0	0	0	24	25	26
1043	0	66	1	1	0	0	0	0	0	0	0	0	0	0	0	0	0	0	1	0	2	7-14 marzo		0	2	3	4	5	6	0	0	9	10	0	12	13	14	0	0	0	18	0	0	21	0	0	24	25	0
1310	0	54	1	1	0	0	0	0	0	0	0	0	0	0	0	0	0	0	1	0	2	2-6 marzo		0	2	3	0	5	6	0	0	9	0	0	12	13	14	15	16	0	0	0	0	21	0	0	24	25	26
3671	0	58	1	1	0	0	0	0	0	0	0	0	0	0	0	0	0	0	1	0	2	7-14 marzo		1	2	3	4	5	6	0	0	9	10	11	12	13	14	15	0	0	0	0	0	21	0	0	24	25	0
1762	1	60	1	1	0	0	0	0	0	0	0	0	0	0	0	0	0	0	1	0	2	dopo il 14 marzo		1	2	3	4	5	6	0	0	9	0	0	12	13	14	0	0	0	0	19	0	21	22	0	0	25	26
802	1	64	1	1	0	0	0	0	0	0	0	0	0	0	0	0	0	0	1	0	2	2-6 marzo		1	2	3	4	5	6	7	0	9	10	11	12	13	14	15	0	0	18	0	0	21	22	23	0	25	26
3778	0	58	1	1	0	0	0	0	0	0	0	0	0	0	0	0	0	0	1	0	2	7-14 marzo		1	2	0	4	5	6	0	0	9	10	0	12	13	0	0	16	0	0	0	0	21	0	0	24	25	26
3685	1	47	1	1	1	0	0	4	0	0	7	0	0	10	11	0	0	0	1	0	2	24 febbraio - 1 marzo		1	2	3	4	5	6	0	8	9	10	0	12	0	14	0	16	0	18	0	0	21	22	0	24	25	26
3273	0	59	1	1	0	0	0	0	0	0	0	0	0	0	0	0	0	0	1	0	2	dopo il 14 marzo		0	0	0	4	0	6	0	0	9	10	0	12	0	0	0	16	0	0	0	0	21	22	0	0	25	26
115	0	47	1	1	0	0	0	0	0	0	0	0	0	0	0	0	0	0	1	0	2	7-14 marzo		1	2	3	4	5	6	7	0	9	10	11	12	13	14	0	16	0	0	0	0	21	0	0	24	25	26
2374	0	59	1	1	0	0	0	0	0	0	0	0	0	0	0	0	0	0	1	0	2	2-6 marzo		1	2	3	4	5	6	0	8	9	10	11	12	13	14	15	0	0	0	0	0	0	22	0	0	25	26
815	0	71	1	1	0	0	0	0	0	0	0	0	0	0	0	0	0	0	1	0	2	2-6 marzo		0	0	0	0	0	0	0	0	0	0	0	0	0	0	0	0	0	0	0	0	0	0	0	0	0	0
679	0	71	1	1	0	0	0	0	0	0	0	0	0	0	0	0	0	0	1	0	2	21-23 febbraio		1	2	0	0	0	6	0	8	9	10	11	12	13	14	0	16	0	0	0	0	0	0	23	0	25	26
3492	0	41	1	1	0	0	0	0	0	0	0	0	0	0	0	0	0	0	1	0	2	7-14 marzo		0	2	3	0	5	0	0	0	9	0	0	12	13	14	0	0	0	0	0	0	21	0	0	24	25	26
2114	1	57	1	1	0	0	0	0	0	0	0	0	0	0	0	0	0	0	1	0	2	7-14 marzo		1	2	3	4	5	6	0	0	9	10	11	12	13	14	0	16	0	0	0	0	21	0	0	24	25	0
3279	1	49	1	1	0	0	0	0	0	0	0	0	0	0	0	0	0	0	1	0	2	7-14 marzo		1	2	3	4	5	6	7	8	9	10	11	12	13	14	15	16	0	0	0	0	21	0	23	0	25	26
350	0	49	1	1	0	0	0	0	0	0	0	0	0	0	0	0	0	0	1	0	2	2-6 marzo		1	2	3	0	0	6	7	8	0	10	11	12	13	14	0	0	17	0	0	0	21	0	23	0	25	26
1902	1	34	1	1	1	2	0	4	0	0	7	0	0	0	11	0	0	0	1	0	2	7-14 marzo		1	2	0	4	5	6	0	0	9	0	0	0	13	0	0	16	0	0	0	0	0	22	0	0	25	0
966	0	55	1	1	0	0	0	0	0	0	0	0	0	0	0	0	0	0	1	0	2	dopo il 14 marzo		1	2	0	0	0	6	0	0	9	0	11	12	13	14	15	0	0	0	0	0	21	0	0	24	25	0
3535	0	60	1	1	0	0	0	0	0	0	0	0	0	0	0	0	0	0	1	0	2	7-14 marzo		1	2	3	4	5	6	0	0	9	10	11	12	13	14	15	16	0	0	0	0	21	22	0	24	25	26
2560	0	55	1	1	0	0	0	0	0	0	0	0	0	0	0	0	0	0	1	0	2	dopo il 14 marzo		1	2	3	4	5	6	0	0	9	10	0	12	13	14	0	16	0	0	0	0	21	0	0	24	25	26
685	0	61	1	1	0	0	0	0	0	0	0	0	0	0	0	0	0	0	1	0	2	7-14 marzo		1	2	3	4	5	6	7	0	9	10	11	0	13	14	0	16	0	0	0	0	0	22	0	24	25	26
1840	0	62	1	1	0	0	0	0	0	0	0	0	0	0	0	0	0	0	1	0	2	7-14 marzo		0	2	3	0	5	6	0	0	0	10	11	12	0	14	0	16	0	0	0	0	21	22	0	0	25	0
232	0	65	1	1	0	0	0	0	0	0	0	0	0	0	0	0	0	0	1	0	2	2-6 marzo		0	2	0	4	5	6	0	0	0	0	0	12	0	0	0	16	0	0	0	0	21	22	0	0	25	26
1546	0	66	1	1	0	0	0	0	0	0	0	0	0	0	0	0	0	0	1	0	2	21-23 febbraio		1	2	3	4	5	6	0	0	9	10	11	12	0	14	0	16	0	0	0	0	21	0	23	24	25	26
2656	0	50	1	1	0	0	0	0	0	0	0	0	0	0	0	0	0	0	1	0	2	7-14 marzo		0	0	3	0	0	6	7	0	9	10	0	12	0	0	0	16	0	0	0	0	21	0	0	24	25	26
3490	0	55	1	1	0	0	0	0	0	0	0	0	0	0	0	0	0	0	1	0	2	dopo il 14 marzo		0	2	3	0	5	6	7	0	9	0	0	12	0	14	0	0	17	0	0	0	21	0	23	24	0	0
2710	0	38	1	1	0	0	0	0	0	0	0	0	0	0	0	0	0	0	1	0	2	24 febbraio - 1 marzo		1	2	3	4	5	6	7	8	9	10	11	12	13	14	0	16	0	0	0	0	21	22	0	24	25	26
2774	0	62	1	1	0	0	0	0	0	0	0	0	0	0	0	0	0	0	1	0	2	dopo il 14 marzo		0	0	0	0	0	0	0	0	0	0	0	0	0	0	0	0	0	0	0	0	0	0	0	0	0	0
105	0	55	1	1	0	0	0	0	0	0	0	0	0	0	0	0	0	0	1	0	2	2-6 marzo		1	2	3	4	5	6	0	0	9	0	0	12	13	14	0	16	0	0	0	0	0	0	0	24	25	26
2613	0	66	1	1	0	0	0	0	0	0	0	0	0	0	0	0	0	0	1	0	2	7-14 marzo		0	2	3	4	5	0	0	0	9	10	0	12	13	14	0	0	17	0	0	0	21	0	23	24	25	26
1259	1	42	1	1	0	0	0	0	0	0	0	0	0	0	0	0	0	0	1	0	2	dopo il 14 marzo		0	2	3	4	5	0	0	0	0	0	0	12	13	14	15	0	0	0	0	0	21	22	0	0	25	0
2573	1	46	1	1	0	0	0	0	0	0	0	0	0	0	0	0	0	0	1	0	2	7-14 marzo		1	0	3	4	5	6	0	0	9	10	11	12	13	14	0	16	0	0	0	0	21	0	0	24	25	26
2440	0	52	1	1	0	0	0	0	0	0	0	0	0	0	0	0	0	0	1	0	2	21-23 febbraio		1	2	3	4	5	6	7	8	9	10	11	12	13	14	15	16	0	18	0	0	21	22	23	24	25	26
2344	0	54	1	1	0	0	0	0	0	0	0	0	0	0	0	0	0	0	1	0	2	2-6 marzo		1	2	3	4	5	6	0	0	9	10	0	12	13	14	15	16	0	0	0	0	21	0	0	24	25	26
2055	0	64	1	1	0	0	0	0	0	0	0	0	0	0	0	0	0	0	1	0	2	dopo il 14 marzo		0	0	0	0	0	0	0	0	9	0	0	0	0	0	0	16	0	0	0	0	21	22	0	0	25	26
133	0	59	1	1	0	0	0	0	0	0	0	0	0	0	0	0	0	0	1	0	2	7-14 marzo		1	2	3	4	5	6	0	0	9	10	11	12	13	14	0	16	0	0	0	0	21	0	0	24	25	26
566	0	56	1	1	1	0	3	4	0	6	0	8	9	0	0	0	0	0	1	0	2	21-23 febbraio		0	0	0	0	0	0	0	0	0	0	0	0	0	0	0	0	0	0	0	0	0	0	0	0	0	0
1726	0	58	1	1	0	0	0	0	0	0	0	0	0	0	0	0	0	0	1	0	2	7-14 marzo		1	2	3	4	5	6	7	0	9	0	0	12	13	14	0	0	17	0	0	0	0	0	0	24	25	26
2286	0	65	1	1	0	0	0	0	0	0	0	0	0	0	0	0	0	0	1	0	2	24 febbraio - 1 marzo		1	2	0	4	5	6	0	0	0	0	0	12	13	14	0	16	0	0	0	0	21	22	0	0	25	26
1145	0	56	1	1	0	0	0	0	0	0	0	0	0	0	0	0	0	0	1	0	2	21-23 febbraio		1	2	3	4	5	6	7	8	9	10	11	12	13	14	0	16	0	0	0	0	21	22	0	0	25	26
2407	1	39	1	1	0	0	0	0	0	0	0	0	0	0	0	0	0	0	1	0	2	7-14 marzo		1	2	3	4	5	6	7	0	9	10	11	12	13	14	15	0	0	0	0	0	21	22	23	0	25	26
2795	0	67	1	1	0	0	0	0	0	0	0	0	0	0	0	0	0	0	1	0	2	2-6 marzo		1	2	3	4	5	6	0	0	9	10	0	12	13	14	0	16	0	0	0	0	21	0	0	24	25	26
2393	0	59	1	1	0	0	0	0	0	0	0	0	0	0	0	0	0	0	1	0	2	7-14 marzo		1	2	3	4	5	6	0	0	9	0	0	12	13	14	0	16	0	0	0	0	21	22	23	0	25	26
535	0	35	1	1	0	0	0	0	0	0	0	0	0	0	0	0	0	0	1	0	2	7-14 marzo		0	0	0	0	0	0	0	0	0	0	0	0	0	0	0	0	0	0	0	0	0	0	0	0	0	0
3176	1	36	1	1	0	0	0	0	0	0	0	0	0	0	0	0	0	0	1	0	2	7-14 marzo		1	2	0	4	5	0	0	0	0	0	0	12	13	0	0	0	0	0	0	0	0	0	0	24	25	26
3138	1	50	1	1	0	0	0	0	0	0	0	0	0	0	0	0	0	0	1	0	2	2-6 marzo		1	2	3	4	5	6	7	8	9	10	11	12	13	14	15	16	0	0	0	0	21	22	23	0	25	26
3678	0	61	1	1	0	0	0	0	0	0	0	0	0	0	0	0	0	0	1	0	2	7-14 marzo		1	2	3	4	5	6	0	0	9	10	0	12	13	14	0	16	0	0	0	0	21	0	0	24	25	26
500	0	67	1	1	0	0	0	0	0	0	0	0	0	0	0	0	0	0	1	0	2	21-23 febbraio		1	2	3	4	5	6	0	0	9	0	11	12	0	14	0	16	0	0	0	0	21	22	0	0	25	26
1424	1	58	1	1	0	0	0	0	0	0	0	0	0	0	0	0	0	0	1	0	2	2-6 marzo		1	2	0	4	5	6	0	0	9	0	0	12	13	14	0	16	0	0	0	0	0	0	0	24	25	26
981	0	63	1	1	0	0	0	0	0	0	0	0	0	0	0	0	0	0	1	0	2	dopo il 14 marzo		1	2	0	4	5	6	7	0	9	10	0	12	13	0	0	16	0	0	0	0	21	0	0	24	25	26
639	0	59	1	1	0	0	0	0	0	0	0	0	0	0	0	0	0	0	1	0	2	21-23 febbraio		1	2	3	4	5	6	7	0	9	10	0	12	13	14	0	16	0	0	0	0	21	22	0	24	25	0
3045	1	54	1	1	0	0	0	0	0	0	0	0	0	0	0	0	0	0	1	0	2	7-14 marzo		1	2	3	4	5	6	0	0	0	10	11	12	13	0	15	16	0	0	0	0	21	22	0	24	25	0
71	0	66	1	1	0	0	0	0	0	0	0	0	0	0	0	0	0	0	1	0	2	2-6 marzo		1	2	0	4	5	6	0	0	9	10	11	12	13	14	0	16	0	0	0	0	21	22	0	24	25	26
2969	0	56	1	1	1	0	0	4	0	0	0	0	9	0	11	0	0	0	1	0	2	7-14 marzo		1	2	3	4	5	6	7	8	9	10	0	12	13	14	0	16	0	0	0	0	21	0	0	24	25	26
1575	0	54	1	1	0	0	0	0	0	0	0	0	0	0	0	0	0	0	1	0	2	2-6 marzo		1	2	3	4	5	6	0	0	9	10	0	12	0	14	0	0	0	0	0	0	21	0	0	24	25	26
1859	0	62	1	1	0	0	0	0	0	0	0	0	0	0	0	0	0	0	1	0	2	7-14 marzo		0	2	3	4	5	6	0	0	9	10	11	12	13	14	15	0	0	0	0	0	21	22	0	24	25	26
985	1	41	1	1	0	0	0	0	0	0	0	0	0	0	0	0	0	0	1	0	2	21-23 febbraio		0	0	0	0	0	0	0	0	0	0	0	0	0	0	0	0	0	0	0	0	0	0	0	0	0	0
2797	0	63	1	1	0	0	0	0	0	0	0	0	0	0	0	0	0	0	1	0	2	7-14 marzo		0	0	0	0	0	0	0	0	0	0	0	0	0	0	0	16	0	0	0	0	0	0	0	24	0	0
1841	1	40	1	1	1	0	0	0	0	0	0	0	0	10	11	0	0	14	1	0	2	7-14 marzo		1	2	3	4	5	6	0	0	9	10	0	12	13	0	0	16	0	0	0	0	0	0	0	24	25	0
755	1	63	1	1	0	0	0	0	0	0	0	0	0	0	0	0	0	0	1	0	2	2-6 marzo		1	2	3	4	5	6	0	0	9	10	11	12	13	14	0	16	0	0	0	0	0	0	0	24	25	26
3482	1	32	1	1	0	0	0	0	0	0	0	0	0	0	0	0	0	0	1	0	2	7-14 marzo		1	2	3	0	0	6	0	0	9	10	0	12	13	14	0	16	0	0	0	0	21	0	0	24	25	26
2539	0	56	1	1	0	0	0	0	0	0	0	0	0	0	0	0	0	0	1	0	2	21-23 febbraio		1	0	3	4	5	6	7	0	9	10	11	12	13	14	0	16	0	0	0	0	21	0	23	0	25	26
1943	0	71	1	1	0	0	0	0	0	0	0	0	0	0	0	0	0	0	1	0	2	7-14 marzo		0	0	0	0	0	0	0	0	9	10	0	12	13	14	0	16	0	0	0	0	21	0	0	24	25	26
2462	0	28	1	1	0	0	0	0	0	0	0	0	0	0	0	0	0	0	1	0	2	24 febbraio - 1 marzo		1	2	3	4	5	6	7	8	9	10	0	12	13	14	0	16	0	0	0	0	21	0	0	24	25	26
1836	0	53	1	1	0	0	0	0	0	0	0	0	0	0	0	0	0	0	1	0	2	2-6 marzo		1	2	3	4	5	6	0	0	9	0	11	12	13	14	15	0	0	0	0	0	21	0	0	24	25	26
2385	0	45	1	1	0	0	0	0	0	0	0	0	0	0	0	0	0	0	1	0	2	21-23 febbraio		1	0	0	0	0	6	0	0	0	0	0	0	0	0	0	16	0	0	0	0	0	0	0	0	0	0
3421	0	41	1	1	0	0	0	0	0	0	0	0	0	0	0	0	0	0	1	0	2	2-6 marzo		1	2	3	4	5	6	7	0	9	10	0	12	13	14	0	16	0	0	0	0	21	0	23	0	25	26
2307	0	56	1	1	0	0	0	0	0	0	0	0	0	0	0	0	0	0	1	0	2	21-23 febbraio		1	0	0	4	5	6	0	0	9	10	0	12	13	14	0	16	0	0	0	0	21	22	0	0	25	26
2792	1	60	1	1	0	0	0	0	0	0	0	0	0	0	0	0	0	0	1	0	2	7-14 marzo		1	2	0	4	5	6	0	0	9	10	0	12	13	14	15	16	0	0	0	0	21	0	23	0	25	26
139	1	64	1	1	0	0	0	0	0	0	0	0	0	0	0	0	0	0	1	0	2	dopo il 14 marzo		0	2	3	4	5	6	0	0	9	10	0	12	0	0	0	16	0	0	0	0	21	22	0	0	25	26
2915	0	52	1	1	0	0	0	0	0	0	0	0	0	0	0	0	0	0	1	0	2	21-23 febbraio		1	0	0	4	5	6	0	0	9	10	0	12	13	14	0	0	0	0	0	0	21	0	0	24	25	0
240		59	1	1	0	0	0	0	0	0	0	0	0	0	0	0	0	0	1	0	2			0	0	0	0	0	0	0	0	0	0	0	0	0	0	0	0	0	0	0	0	0	0	0	0	0	0
2863	0	60	1	1	0	0	0	0	0	0	0	0	0	0	0	0	0	0	1	0	2	24 febbraio - 1 marzo		1	2	3	4	5	6	0	0	9	10	0	12	13	0	0	16	0	0	0	0	21	22	0	0	25	26
3434	0	49	1	1	0	0	0	0	0	0	0	0	0	0	0	0	0	0	1	0	2	2-6 marzo		1	2	3	4	5	6	7	8	9	10	11	12	13	14	15	16	0	0	0	0	21	0	0	24	25	26
601	0	46	1	1	0	0	0	0	0	0	0	0	0	0	0	0	0	0	1	0	2	dopo il 14 marzo		1	2	3	0	5	6	7	0	0	10	0	12	13	14	0	16	0	0	0	0	0	22	0	0	0	0
3563	1	44	1	1	0	0	0	0	0	0	0	0	0	0	0	0	0	0	1	0	2	7-14 marzo		1	2	3	4	5	6	0	0	9	10	0	12	13	14	15	0	0	0	0	0	21	0	0	24	25	26
1831	1	53	1	1	0	0	0	0	0	0	0	0	0	0	0	0	0	0	1	0	2	21-23 febbraio		0	0	0	0	0	0	0	0	0	0	0	0	0	0	0	0	0	0	0	0	0	0	0	0	0	0
1464	0	60	1	1	0	0	0	0	0	0	0	0	0	0	0	0	0	0	1	0	2	7-14 marzo		0	2	0	4	5	0	0	0	0	0	0	0	0	14	0	16	0	0	0	0	0	0	0	24	25	26
499	0	61	1	1	0	0	0	0	0	0	0	0	0	0	0	0	0	0	1	0	2	7-14 marzo		1	2	3	4	5	0	7	0	0	10	0	12	0	0	0	0	0	0	19	0	0	0	0	24	25	26
1740	0	67	1	1	0	0	0	0	0	0	0	0	0	0	0	0	0	0	1	0	2	7-14 marzo		0	2	3	4	5	0	0	0	9	10	0	12	0	14	0	16	0	0	0	0	21	0	0	24	0	26
839	0	39	1	1	0	0	0	0	0	0	0	0	0	0	0	0	0	0	1	0	2	21-23 febbraio		1	2	3	4	5	0	0	0	9	10	11	12	13	0	0	16	0	0	0	0	21	22	0	24	25	26
2353	1	52	1	1	0	0	0	0	0	0	0	0	0	0	0	0	0	0	1	0	2	dopo il 14 marzo		1	0	3	4	5	6	7	8	9	10	11	12	13	14	15	0	17	0	0	0	21	22	0	0	25	26
249	0	48	1	1	0	0	0	0	0	0	0	0	0	0	0	0	0	0	1	0	2	24 febbraio - 1 marzo		1	2	3	4	5	6	7	8	9	10	11	12	13	14	0	16	0	18	0	0	21	22	0	24	25	26
1700	1	49	1	1	0	0	0	0	0	0	0	0	0	0	0	0	0	0	1	0	2	2-6 marzo		1	2	3	4	5	6	7	0	9	10	11	12	13	0	15	0	0	0	0	0	21	22	0	0	25	26
3454	1	27	1	1	1	2	3	4	0	6	7	0	0	10	0	0	0	0	1	0	2	7-14 marzo		0	0	0	0	0	0	0	0	0	0	0	0	0	0	0	0	0	0	0	0	0	0	0	0	0	0
881	0	54	1	1	1	0	0	0	0	0	0	0	9	0	0	0	0	0	1	0	2	7-14 marzo		0	0	3	4	0	6	7	0	9	10	0	12	13	14	0	0	0	0	0	0	21	0	0	24	25	26
1125	0	40	1	1	0	0	0	0	0	0	0	0	0	0	0	0	0	0	1	0	2	7-14 marzo		1	2	3	0	0	0	0	0	0	10	11	12	13	14	0	16	0	0	0	0	21	0	0	24	25	26
3427	0	67	1	1	1	2	0	0	0	0	0	0	0	0	0	0	0	0	1	0	2	24 febbraio - 1 marzo		0	2	0	0	0	6	0	0	0	0	0	0	0	0	0	0	0	0	0	0	0	22	0	0	0	26
1402	1	32	1	1	0	0	0	0	0	0	0	0	0	0	0	0	0	0	1	0	2	7-14 marzo		1	2	3	4	5	6	0	0	9	10	11	12	13	0	0	0	0	0	0	0	21	0	0	24	25	26
2762	0	62	1	1	0	0	0	0	0	0	0	0	0	0	0	0	0	0	1	0	2	2-6 marzo		0	2	3	4	5	6	0	0	9	10	11	12	13	14	0	16	0	0	0	0	0	22	23	0	25	26
2782	1	40	1	1	0	0	0	0	0	0	0	0	0	0	0	0	0	0	1	0	2	7-14 marzo		1	2	0	4	0	0	0	0	0	10	0	12	0	0	0	16	0	0	0	0	21	0	0	24	25	26
842	0	63	1	1	0	0	0	0	0	0	0	0	0	0	0	0	0	0	1	0	2	24 febbraio - 1 marzo		1	2	3	4	5	6	0	0	9	10	11	12	13	14	0	16	0	0	0	0	21	22	0	0	25	26
196	0	61	1	1	0	0	0	0	0	0	0	0	0	0	0	0	0	0	1	0	2	dopo il 14 marzo		0	2	3	4	5	6	0	0	9	10	0	12	13	14	15	0	0	0	19	0	21	0	0	24	25	26
3333	0	56	1	1	0	0	0	0	0	0	0	0	0	0	0	0	0	0	1	0	2	24 febbraio - 1 marzo		1	2	0	4	5	6	0	0	9	10	11	12	13	14	15	0	0	0	0	0	21	0	0	24	25	26
3117	0	51	1	1	0	0	0	0	0	0	0	0	0	0	0	0	0	0	1	0	2	7-14 marzo		1	2	3	4	5	6	7	8	9	10	0	12	13	14	15	0	0	0	0	0	21	0	0	24	25	26
2686	0	55	1	1	0	0	0	0	0	0	0	0	0	0	0	0	0	0	1	0	2	24 febbraio - 1 marzo		1	2	3	4	5	6	0	0	9	0	11	12	13	14	15	16	0	0	0	0	21	0	0	24	25	26
2985	1	35	1	1	0	0	0	0	0	0	0	0	0	0	0	0	0	0	1	0	2	7-14 marzo		0	0	0	0	0	0	0	0	0	0	0	0	0	0	0	0	0	0	0	0	0	0	0	0	0	0
1867	0	71	1	1	0	0	0	0	0	0	0	0	0	0	0	0	0	0	1	0	2	dopo il 14 marzo		1	2	0	4	5	6	0	0	9	10	11	12	13	14	15	0	0	0	0	0	21	22	0	24	0	26
921	0	60	1	1	0	0	0	0	0	0	0	0	0	0	0	0	0	0	1	0	2	24 febbraio - 1 marzo		1	2	3	4	5	6	0	0	9	10	11	12	13	14	0	16	0	0	0	0	21	0	0	24	25	26
1552	0	71	1	1	0	0	0	0	0	0	0	0	0	0	0	0	0	0	1	0	2	2-6 marzo		1	2	3	4	5	6	0	0	9	10	11	12	0	14	0	16	0	0	0	0	21	22	23	24	25	26
1414	1	55	1	1	0	0	0	0	0	0	0	0	0	0	0	0	0	0	1	0	2	7-14 marzo		1	2	3	4	5	6	0	0	9	10	11	12	0	0	0	16	0	0	0	0	0	0	0	24	25	26
3495	1	51	1	1	0	0	0	0	0	0	0	0	0	0	0	0	0	0	1	0	2	7-14 marzo		1	2	0	4	5	0	0	0	9	10	0	12	13	14	15	0	0	18	0	0	21	22	0	24	25	26
3771	0	63	1	1	0	0	0	0	0	0	0	0	0	0	0	0	0	0	1	0	2	7-14 marzo		1	0	0	4	5	0	0	0	9	10	0	12	13	14	0	16	0	0	0	0	21	22	23	0	25	26
1960	0	58	1	1	0	0	0	0	0	0	0	0	0	0	0	0	0	0	1	0	2	dopo il 14 marzo		1	2	3	4	5	6	7	8	9	10	11	12	13	14	15	0	0	0	0	0	21	22	23	24	25	26
3687	0	63	1	1	0	0	0	0	0	0	0	0	0	0	0	0	0	0	1	0	2	24 febbraio - 1 marzo		1	2	3	4	5	6	0	0	9	10	0	12	13	14	0	16	0	0	0	0	21	22	0	0	25	26
1819	1	71	1	1	0	0	0	0	0	0	0	0	0	0	0	0	0	0	1	0	2	21-23 febbraio		1	2	3	4	5	0	7	0	9	10	11	12	0	14	0	16	0	0	0	0	21	0	23	0	25	26
1415	0	60	1	1	0	0	0	0	0	0	0	0	0	0	0	0	0	0	1	0	2	24 febbraio - 1 marzo		1	2	3	4	5	6	7	8	9	10	11	12	13	14	15	0	0	0	0	0	21	22	0	24	25	26
599	0	46	1	1	0	0	0	0	0	0	0	0	0	0	0	0	0	0	1	0	2	dopo il 14 marzo		1	2	3	4	5	0	0	0	9	10	0	12	13	0	15	0	0	0	0	0	21	0	0	24	25	0
1947	0	54	1	1	0	0	0	0	0	0	0	0	0	0	0	0	0	0	1	0	2	7-14 marzo		1	2	3	4	5	6	0	0	9	0	0	12	13	14	0	16	0	0	0	0	21	0	0	24	25	26
1319	0	58	1	1	0	0	0	0	0	0	0	0	0	0	0	0	0	0	1	0	2	7-14 marzo		1	0	0	4	5	6	0	0	9	0	0	0	0	0	0	16	0	0	0	0	0	0	0	24	25	0
2979	1	41	1	1	0	0	0	0	0	0	0	0	0	0	0	0	0	0	1	0	2	2-6 marzo		1	2	3	4	5	6	0	0	9	10	11	12	13	14	15	0	0	0	0	0	21	22	23	0	25	26
2930	0	58	1	1	0	0	0	0	0	0	0	0	0	0	0	0	0	0	1	0	2	2-6 marzo		1	2	3	0	0	0	0	0	9	0	0	12	13	0	0	16	0	0	0	0	0	0	23	0	25	26
2645	0	61	1	1	0	0	0	0	0	0	0	0	0	0	0	0	0	0	2	0	2	21-23 febbraio		1	2	3	4	5	6	7	8	9	10	0	12	13	0	0	16	0	0	0	0	21	0	23	24	25	26
2636	0	59	1	1	0	0	0	0	0	0	0	0	0	0	0	0	0	0	1	0	2	21-23 febbraio		1	2	3	4	5	6	0	0	9	10	0	12	0	14	15	0	0	0	0	0	21	22	0	0	25	0
2218	1	53	1	1	0	0	0	0	0	0	0	0	0	0	0	0	0	0	1	0	2	dopo il 14 marzo		1	2	0	0	5	6	0	0	0	10	0	12	13	14	0	0	0	0	0	20	21	22	0	0	0	26
1068	0	66	1	1	0	0	0	0	0	0	0	0	0	0	0	0	0	0	1	0	2	2-6 marzo		1	2	3	4	5	6	0	0	9	10	11	12	13	14	15	0	0	0	0	0	21	22	0	0	25	26
25	1	42	1	1	0	0	0	0	0	0	0	0	0	0	0	0	0	0	1	0	2	2-6 marzo		1	2	3	4	5	6	0	8	9	10	0	12	13	14	0	16	0	0	0	0	21	0	23	0	25	26
1311	0	68	1	1	0	0	0	0	0	0	0	0	0	0	0	0	0	0	1	0	2	24 febbraio - 1 marzo		1	2	3	4	5	6	7	0	9	10	11	12	13	14	0	16	0	0	0	0	21	22	23	0	25	26
676	0	65	1	1	0	0	0	0	0	0	0	0	0	0	0	0	0	0	1	0	2	24 febbraio - 1 marzo		1	2	3	4	5	6	7	8	9	10	11	12	13	14	15	16	0	0	0	0	21	22	23	0	25	26
146	0	41	1	1	0	0	0	0	0	0	0	0	0	0	0	0	0	0	1	0	2	7-14 marzo		1	2	3	4	5	6	7	8	9	10	0	12	13	14	0	16	0	0	0	0	21	0	0	24	25	26
1554	0	61	1	1	1	0	0	4	0	0	0	0	0	0	0	12	13	0	1	0	2	2-6 marzo		1	2	0	4	5	0	0	0	0	0	0	12	13	14	0	0	0	0	0	20	21	0	0	24	25	26
3103	0	56	1	1	1	0	3	0	0	0	0	0	0	0	0	0	0	0	1	0	2	7-14 marzo		1	2	3	4	0	0	0	0	0	10	0	12	13	14	0	0	0	18	0	0	21	22	0	24	25	26
3723	0	45	1	1	0	0	0	0	0	0	0	0	0	0	0	0	0	0	1	0	2	7-14 marzo		1	2	3	4	5	6	7	0	9	10	11	12	13	14	15	0	0	0	0	0	0	0	0	24	25	26
2043	1	65	1	1	0	0	0	0	0	0	0	0	0	0	0	0	0	0	1	0	2	dopo il 14 marzo		0	0	0	0	0	0	0	0	0	0	0	0	0	0	0	0	0	0	0	0	0	0	0	0	0	0
396	0	44	1	1	0	0	0	0	0	0	0	0	0	0	0	0	0	0	1	0	2	7-14 marzo		1	2	3	4	5	6	0	0	9	10	0	12	13	14	0	0	0	0	0	0	21	0	0	24	25	0
3003	1	51	1	1	0	0	0	0	0	0	0	0	0	0	0	0	0	0	1	0	2	21-23 febbraio		0	0	0	0	0	0	0	0	0	0	0	0	0	0	0	0	0	0	0	0	0	0	0	0	0	0
1876	0	39	1	1	0	0	0	0	0	0	0	0	0	0	0	0	0	0	1	0	2	2-6 marzo		1	2	0	4	5	0	0	0	9	10	0	12	13	14	0	0	17	0	0	0	21	22	0	0	25	26
1803	0	52	1	1	0	0	0	0	0	0	0	0	0	0	0	0	0	0	1	0	2	dopo il 14 marzo		1	2	3	4	5	6	0	0	9	10	0	12	13	14	15	0	0	18	0	0	21	0	0	24	25	26
2599	0	69	1	1	0	0	0	0	0	0	0	0	0	0	0	0	0	0	1	0	2	2-6 marzo		1	2	3	4	5	6	7	0	9	10	11	12	13	14	0	16	0	0	0	0	21	0	23	24	25	26
3198	0	66	1	1	0	0	0	0	0	0	0	0	0	0	0	0	0	0	1	0	2	2-6 marzo		1	2	3	4	5	6	0	0	9	10	11	12	13	14	0	16	17	0	0	0	21	22	0	24	25	26
2728	0	67	1	1	0	0	0	0	0	0	0	0	0	0	0	0	0	0	1	0	2	7-14 marzo		1	2	3	4	5	0	0	0	0	10	0	0	0	14	0	16	0	0	0	0	0	0	0	24	25	26
3133	0	58	1	1	0	0	0	0	0	0	0	0	0	0	0	0	0	0	1	0	2	7-14 marzo		1	2	3	4	5	6	0	0	9	10	0	12	13	14	0	0	0	0	0	0	21	0	23	0	25	26
2833	0	35	1	1	1	2	3	0	5	0	0	0	9	10	0	0	0	0	1	0	2	7-14 marzo		0	0	0	0	0	0	0	0	0	0	0	0	0	0	0	0	0	0	0	0	0	0	0	0	0	0
2890	1	63	1	1	0	0	0	0	0	0	0	0	0	0	0	0	0	0	1	0	2	7-14 marzo		1	2	3	0	5	0	0	0	9	0	11	12	13	14	0	16	0	0	0	0	21	0	23	0	25	26
1086	0	57	1	1	0	0	0	0	0	0	0	0	0	0	0	0	0	0	1	0	2	2-6 marzo		0	2	3	4	5	6	7	8	9	0	0	12	0	0	0	16	0	0	0	0	0	0	0	24	25	26
2984	0	31	1	1	0	0	0	0	0	0	0	0	0	0	0	0	0	0	1	0	2	7-14 marzo		1	0	3	4	5	6	0	0	9	10	0	12	13	14	15	16	0	0	0	0	21	22	0	0	25	26
1	1	36	1	1	0	0	0	0	0	0	0	0	0	0	0	0	0	0	1	0	2	dopo il 14 marzo		1	2	3	4	5	6	0	0	9	10	11	12	13	14	0	16	0	0	0	0	21	0	0	24	25	26
751	1	55	1	1	0	0	0	0	0	0	0	0	0	0	0	0	0	0	1	0	2	7-14 marzo		0	2	3	4	5	6	0	0	9	10	0	12	0	0	0	0	0	18	0	0	21	22	0	0	25	26
3291	0	57	1	1	0	0	0	0	0	0	0	0	0	0	0	0	0	0	1	0	2	2-6 marzo		1	2	3	4	5	6	7	8	9	10	0	12	13	14	0	16	0	0	0	0	21	22	0	0	25	26
2590	0	58	1	1	0	0	0	0	0	0	0	0	0	0	0	0	0	0	1	0	2	2-6 marzo		0	2	3	4	5	6	7	0	9	10	11	12	13	14	15	16	0	0	0	0	21	0	0	24	25	26
3696	0	56	1	1	0	0	0	0	0	0	0	0	0	0	0	0	0	0	1	0	2	dopo il 14 marzo		0	2	3	4	5	6	0	0	9	10	11	12	13	14	0	16	0	0	0	0	21	22	23	24	25	0
707	0	66	1	1	0	0	0	0	0	0	0	0	0	0	0	0	0	0	1	0	2	24 febbraio - 1 marzo		0	2	3	4	5	6	0	0	9	10	0	12	13	14	0	16	0	0	0	0	21	22	0	0	25	26
1622	0	71	1	1	0	0	0	0	0	0	0	0	0	0	0	0	0	0	1	0	2	24 febbraio - 1 marzo		1	0	0	0	0	0	0	0	9	0	0	12	13	0	15	0	0	0	0	0	21	0	23	0	25	26
3288	0	70	1	1	0	0	0	0	0	0	0	0	0	0	0	0	0	0	1	0	2	dopo il 14 marzo		0	2	0	0	5	6	0	0	9	10	0	12	13	0	0	0	0	0	0	0	21	0	0	24	0	26
130	0	52	1	1	0	0	0	0	0	0	0	0	0	0	0	0	0	0	1	0	2	7-14 marzo		1	2	3	4	5	6	7	0	9	10	11	12	13	14	15	16	0	0	0	0	21	0	23	0	25	26
3536	1	46	1	1	0	0	0	0	0	0	0	0	0	0	0	0	0	0	1	0	2	7-14 marzo		1	2	3	4	5	6	0	0	9	10	11	12	13	14	15	0	0	0	0	0	21	22	0	0	25	26
2423	0	51	1	1	0	0	0	0	0	0	0	0	0	0	0	0	0	0	1	0	2	21-23 febbraio		1	2	3	4	5	6	0	0	9	10	0	12	13	14	15	0	0	0	0	0	21	22	0	24	25	26
49	1	36	1	1	0	0	0	0	0	0	0	0	0	0	0	0	0	0	1	0	2	7-14 marzo		1	2	0	4	5	6	0	0	9	10	11	12	13	14	0	16	0	0	19	0	21	0	23	24	25	26
3169	0	45	1	1	0	0	0	0	0	0	0	0	0	0	0	0	0	0	1	0	2	7-14 marzo		1	2	0	4	5	0	0	0	9	0	0	12	13	0	15	16	17	0	0	0	21	22	0	0	25	26
2322	0	67	1	1	0	0	0	0	0	0	0	0	0	0	0	0	0	0	1	0	2	7-14 marzo		1	2	3	4	5	6	0	0	9	10	11	12	13	14	0	16	0	0	0	0	21	0	0	24	25	26
3827	0	45	1	1	0	0	0	0	0	0	0	0	0	0	0	0	0	0	1	0	2	24 febbraio - 1 marzo		1	2	0	4	5	6	0	0	9	0	0	12	13	14	0	0	0	0	0	0	21	22	0	0	25	26
3109	0	58	1	1	0	0	0	0	0	0	0	0	0	0	0	0	0	0	1	0	2	2-6 marzo		1	2	0	0	5	0	0	0	9	0	0	0	13	14	0	0	0	0	0	0	0	0	0	24	25	0
2791	1	43	1	1	0	0	0	0	0	0	0	0	0	0	0	0	0	0	1	0	2	24 febbraio - 1 marzo		1	2	3	4	5	6	0	0	9	10	0	12	13	14	15	0	0	0	0	0	0	22	0	24	25	0
964	0	62	1	1	0	0	0	0	0	0	0	0	0	0	0	0	0	0	1	0	2	24 febbraio - 1 marzo		1	2	3	4	0	6	0	0	9	10	11	12	13	14	15	16	0	0	19	0	21	0	23	24	25	26
2199	0	61	1	1	0	0	0	0	0	0	0	0	0	0	0	0	0	0	1	0	2	21-23 febbraio		1	0	0	0	0	6	0	0	0	0	11	12	0	14	0	16	0	0	0	0	21	0	0	24	25	26
190	1	27	1	1	0	0	0	0	0	0	0	0	0	0	0	0	0	0	1	0	2	7-14 marzo		1	2	0	4	0	0	0	0	9	10	11	0	0	0	0	0	0	0	0	0	0	22	0	0	25	0
40	0	54	1	1	0	0	0	0	0	0	0	0	0	0	0	0	0	0	1	0	2	24 febbraio - 1 marzo		0	2	3	0	0	0	7	8	0	0	0	12	13	0	15	0	0	0	0	0	21	22	23	0	25	0
3589	1	48	1	1	0	0	0	0	0	0	0	0	0	0	0	0	0	0	1	0	2	2-6 marzo		1	0	3	4	5	6	7	8	9	10	0	12	13	14	0	0	17	0	0	0	21	0	0	24	25	26
1773	1	49	1	1	0	0	0	0	0	0	0	0	0	0	0	0	0	0	1	0	2	7-14 marzo		1	2	0	0	0	6	0	0	0	0	0	0	0	0	15	0	0	0	0	0	0	0	0	0	0	0
3094	0	29	1	1	1	2	3	4	0	6	0	8	0	0	11	0	0	0	1	0	2	7-14 marzo		1	0	0	0	0	0	0	0	9	10	0	12	0	0	0	0	0	0	0	0	21	0	0	24	25	0
3728	0	66	1	1	1	0	3	0	0	0	0	0	9	0	0	0	0	14	1	0	2	7-14 marzo		1	0	0	0	5	6	0	0	9	0	0	12	0	14	0	16	0	0	0	20	21	0	0	24	25	26
1662	0	59	1	1	0	0	0	0	0	0	0	0	0	0	0	0	0	0	1	0	2	24 febbraio - 1 marzo		1	2	3	4	5	6	7	8	9	10	11	12	0	14	15	16	0	0	0	0	21	0	0	24	25	26
3654	0	67	1	1	0	0	0	0	0	0	0	0	0	0	0	0	0	0	1	0	2	21-23 febbraio		1	2	3	4	5	6	7	0	9	10	11	12	13	14	0	16	0	0	0	0	21	22	23	24	25	26
387	0	52	1	1	0	0	0	0	0	0	0	0	0	0	0	0	0	0	1	0	2	2-6 marzo		1	2	0	4	5	6	7	0	9	10	11	12	13	14	0	0	17	0	19	0	21	0	23	0	25	26
2456	1	29	1	1	0	0	0	0	0	0	0	0	0	0	0	0	0	0	1	0	2	7-14 marzo		1	2	3	4	5	6	0	0	9	10	0	12	13	14	15	0	0	0	0	0	21	0	0	24	25	26
3044	0	36	1	1	0	0	0	0	0	0	0	0	0	0	0	0	0	0	1	0	2	21-23 febbraio		1	2	3	4	5	6	7	0	9	0	0	12	0	14	0	0	17	0	0	0	21	0	0	24	25	26
2309	1	42	1	1	0	0	0	0	0	0	0	0	0	0	0	0	0	0	1	0	2	2-6 marzo		1	2	3	0	5	6	0	0	9	10	0	12	13	14	0	16	0	0	0	0	21	0	0	24	25	26
3069	0	57	1	1	0	0	0	0	0	0	0	0	0	0	0	0	0	0	1	0	2	7-14 marzo		1	2	3	4	5	6	0	0	0	10	0	12	13	14	0	0	17	0	0	0	21	0	0	24	25	26
2012	0	48	1	1	1	0	0	4	0	0	7	0	9	10	0	0	0	0	1	0	2	7-14 marzo		1	0	0	0	0	6	0	0	9	10	0	12	13	14	0	16	0	18	0	0	21	0	23	0	25	26
472	0	58	1	1	0	0	0	0	0	0	0	0	0	0	0	0	0	0	1	0	2	2-6 marzo		0	0	0	0	0	0	0	0	9	0	0	12	0	0	0	0	0	0	0	0	0	0	0	0	0	0
1351	0	48	1	4	0	0	0	0	0	0	0	0	0	0	0	0	0	0	1	0	2	7-14 marzo		1	2	3	4	5	6	0	0	9	10	0	12	13	14	0	16	0	0	0	0	21	0	0	24	25	26
1568	0	50	1	4	0	0	0	0	0	0	0	0	0	0	0	0	0	0	1	0	2	7-14 marzo		1	2	3	4	5	6	7	8	0	10	0	12	13	14	0	16	0	0	0	0	21	22	0	0	25	26
2386	0	56	1	4	0	0	0	0	0	0	0	0	0	0	0	0	0	0	1	0	2	2-6 marzo		1	2	0	4	5	6	0	0	9	10	0	12	13	14	15	16	0	0	0	0	21	0	0	24	25	26
2106	0	47	1	4	0	0	0	0	0	0	0	0	0	0	0	0	0	0	1	0	2	dopo il 14 marzo		1	2	0	4	5	6	0	0	9	0	11	12	13	14	15	0	0	0	0	0	21	22	0	0	25	26
2925	0	57	1	4	0	0	0	0	0	0	0	0	0	0	0	0	0	0	1	0	2	2-6 marzo		1	2	3	4	5	0	0	0	9	10	0	12	13	14	0	16	0	0	0	0	0	0	0	24	25	0
1753	0	34	1	4	0	0	0	0	0	0	0	0	0	0	0	0	0	0	1	0	2	7-14 marzo		1	2	3	4	0	6	0	0	9	0	0	12	13	0	0	0	17	0	0	0	21	0	0	24	25	26
1897	0	59	1	4	0	0	0	0	0	0	0	0	0	0	0	0	0	0	1	0	2	7-14 marzo		1	2	3	4	5	6	7	8	9	10	11	12	13	14	0	16	0	0	0	0	21	0	23	24	25	26
2455	1	39	1	4	0	0	0	0	0	0	0	0	0	0	0	0	0	0	1	0	2	7-14 marzo		1	2	3	4	5	6	7	0	9	10	11	12	13	14	0	0	0	0	0	0	21	0	0	24	25	26
2102	0	61	1	4	0	0	0	0	0	0	0	0	0	0	0	0	0	0	1	0	2	7-14 marzo		1	2	0	0	0	6	7	8	9	10	0	12	13	14	0	16	0	0	0	0	21	0	23	0	25	26
2898	0	26	1	4	0	0	0	0	0	0	0	0	0	0	0	0	0	0	1	0	2	7-14 marzo		1	2	3	4	5	6	7	8	9	10	11	12	13	14	15	16	0	0	0	0	0	22	0	0	25	26
2045	1	52	1	4	0	0	0	0	0	0	0	0	0	0	0	0	0	0	1	0	2	7-14 marzo		1	2	3	4	5	6	0	0	9	10	0	12	13	14	0	0	0	0	0	0	21	22	0	0	25	26
2093	0	71	1	4	0	0	0	0	0	0	0	0	0	0	0	0	0	0	1	0	2	7-14 marzo		1	2	0	4	5	6	7	0	9	10	11	12	13	14	0	16	17	0	0	0	21	22	0	24	25	26
176	0	38	1	6	0	0	0	0	0	0	0	0	0	0	0	0	0	0	1	0	2	7-14 marzo		1	2	3	4	5	6	0	8	9	10	11	12	13	14	0	16	0	0	0	0	0	22	0	24	25	26
3763	1	41	1	6	0	0	0	0	0	0	0	0	0	0	0	0	0	0	1	0	2	dopo il 14 marzo		1	2	3	4	5	6	0	0	9	10	0	12	13	14	0	16	0	0	0	0	21	22	0	0	25	26
308	0	39	1	6	0	0	0	0	0	0	0	0	0	0	0	0	0	0	1	0	2	2-6 marzo		1	2	0	4	5	6	0	8	9	10	0	12	13	14	0	16	0	0	0	0	21	0	0	24	25	26
1983	0	59	1	7	0	0	0	0	0	0	0	0	0	0	0	0	0	0	1	0	2	7-14 marzo		1	2	3	4	5	6	7	8	9	10	11	12	13	14	15	0	0	0	0	0	21	0	23	24	25	26
2203	0	51	1	7	0	0	0	0	0	0	0	0	0	0	0	0	0	0	1	0	2	7-14 marzo		1	2	0	4	5	6	0	0	9	10	0	12	13	14	15	0	0	0	0	0	21	22	0	0	25	26
662	0	68	1	7	0	0	0	0	0	0	0	0	0	0	0	0	0	0	1	0	2	2-6 marzo		1	2	0	4	5	6	0	0	9	0	0	0	0	0	0	16	0	0	0	0	21	0	0	24	25	26
2785	1	33	1	7	0	0	0	0	0	0	0	0	0	0	0	0	0	0	1	0	2	dopo il 14 marzo		1	2	3	0	0	6	0	0	9	10	0	12	13	0	0	16	0	0	0	0	0	0	0	0	25	26
3214	1	38	1	7	0	0	0	0	0	0	0	0	0	0	0	0	0	0	1	0	2	dopo il 14 marzo		1	0	0	0	0	6	0	0	9	0	0	0	13	0	0	16	0	0	0	0	0	0	0	0	0	26
2320	0	39	1	7	0	0	0	0	0	0	0	0	0	0	0	0	0	0	1	0	2	2-6 marzo		1	2	3	4	5	6	7	8	9	10	11	12	13	14	15	16	0	0	0	0	21	22	23	0	25	26
1390	0	34	1	8	0	0	0	0	0	0	0	0	0	0	0	0	0	0	1	0	2	2-6 marzo		1	2	0	0	0	0	0	0	9	0	11	0	0	0	0	0	17	0	0	0	0	0	0	0	25	0
2823	1	59	1	8	0	0	0	0	0	0	0	0	0	0	0	0	0	0	1	0	2	7-14 marzo		0	2	3	4	5	6	0	0	0	0	0	0	0	0	0	16	0	0	0	0	0	0	0	24	0	0
861	0	53	1	8	0	0	0	0	0	0	0	0	0	0	0	0	0	0	1	0	2	7-14 marzo		1	2	3	4	5	6	0	0	0	10	0	12	13	0	15	0	0	0	0	0	21	0	0	24	25	26
2877	1	57	1	8	0	0	0	0	0	0	0	0	0	0	0	0	0	0	1	0	2	7-14 marzo		1	2	3	4	5	6	7	8	9	10	11	12	13	14	0	16	17	0	0	0	21	0	23	24	25	26
64	0	56	1	8	0	0	0	0	0	0	0	0	0	0	0	0	0	0	1	0	2	24 febbraio - 1 marzo		1	2	3	4	5	6	7	8	0	10	0	12	0	14	0	16	0	0	0	0	21	22	23	24	25	26
2693	0	39	1	8	0	0	0	0	0	0	0	0	0	0	0	0	0	0	1	0	2	2-6 marzo		1	2	0	4	5	6	0	0	9	10	0	12	13	0	0	16	0	0	0	0	21	0	0	24	25	26
2531	0	59	1	8	0	0	0	0	0	0	0	0	0	0	0	0	0	0	1	0	2	dopo il 14 marzo		1	2	3	4	5	6	0	0	9	10	0	12	13	0	15	0	0	18	0	0	0	22	0	0	25	26
89	0	64	1	8	0	0	0	0	0	0	0	0	0	0	0	0	0	0	1	0	2	21-23 febbraio		1	2	3	4	5	6	7	8	9	10	0	12	0	14	0	0	17	0	0	0	21	0	0	24	25	26
1847	0	52	1	8	0	0	0	0	0	0	0	0	0	0	0	0	0	0	1	0	2	7-14 marzo		1	2	3	4	5	6	0	0	9	10	0	12	0	0	15	0	0	0	0	0	0	22	23	0	25	26
2206	0	61	1	8	0	0	0	0	0	0	0	0	0	0	0	0	0	0	1	0	2	7-14 marzo		1	2	0	4	5	6	0	0	9	10	0	12	13	14	0	0	0	18	0	0	21	0	0	24	25	26
1076	0	43	1	8	0	0	0	0	0	0	0	0	0	0	0	0	0	0	1	0	2	7-14 marzo		1	2	3	4	5	6	0	0	9	10	0	12	13	14	15	0	0	0	0	0	0	0	23	0	25	0
1862	1	46	1	8	0	0	0	0	0	0	0	0	0	0	0	0	0	0	1	0	2	24 febbraio - 1 marzo		1	2	3	4	5	6	0	0	9	10	0	12	13	14	15	16	0	0	0	0	21	22	0	24	25	26
1082	0	58	1	8	0	0	0	0	0	0	0	0	0	0	0	0	0	0	1	0	2	24 febbraio - 1 marzo		1	2	3	4	5	6	0	8	9	10	11	12	13	14	0	16	0	0	0	0	21	0	23	0	25	26
609	1	61	1	9	0	0	0	0	0	0	0	0	0	0	0	0	0	0	1	0	2	2-6 marzo		1	2	3	4	5	0	0	0	9	10	0	12	13	14	0	0	0	0	0	0	21	0	0	24	25	26
175	0	67	1	11	0	0	0	0	0	0	0	0	0	0	0	0	0	0	1	0	2	7-14 marzo		0	0	0	0	0	0	0	0	0	0	0	0	0	0	0	0	0	0	0	0	0	0	0	0	0	0
3567	1	30	1	11	0	0	0	0	0	0	0	0	0	0	0	0	0	0	1	0	2	24 febbraio - 1 marzo		1	2	3	4	5	6	7	0	9	10	11	12	13	14	15	0	0	0	0	0	21	0	0	24	25	26
2730	0	45	1	11	0	0	0	0	0	0	0	0	0	0	0	0	0	0	1	0	2	24 febbraio - 1 marzo		1	2	0	4	5	6	7	8	9	10	0	12	13	14	15	0	0	0	0	0	21	0	0	24	25	26
1709	0	59	1	13	0	0	0	0	0	0	0	0	0	0	0	0	0	0	1	0	2	21-23 febbraio		1	2	3	4	5	6	7	8	9	10	11	12	13	14	0	16	0	0	0	0	21	0	23	0	25	26
152	0	56	1	13	0	0	0	0	0	0	0	0	0	0	0	0	0	0	1	0	2	21-23 febbraio		1	0	3	4	5	0	7	0	9	0	11	12	13	14	15	0	0	0	0	0	0	0	0	24	25	26
1698	0	55	1		0	0	0	0	0	0	0	0	0	0	0	0	0	0	1	0	2	7-14 marzo		1	2	3	4	5	6	0	0	9	10	0	12	13	14	0	16	0	0	0	0	21	0	0	24	25	26
2477	0	70	4	1	0	0	0	0	0	0	0	0	0	0	0	0	0	0	1	0	2	2-6 marzo		1	2	3	4	5	6	0	0	9	10	0	12	13	14	0	16	0	0	0	0	21	0	0	24	25	0
737	0	66	4	1	0	0	0	0	0	0	0	0	0	0	0	0	0	0	1	0	2	24 febbraio - 1 marzo		0	2	3	4	5	0	7	0	9	10	11	12	13	14	15	16	0	0	0	0	21	22	23	24	0	26
2831	0	59	4	1	0	0	0	0	0	0	0	0	0	0	0	0	0	0	1	0	2	21-23 febbraio		1	2	3	4	5	6	7	8	9	10	11	12	13	14	0	0	0	18	0	0	21	22	0	0	25	26
62	0	66	4	1	0	0	0	0	0	0	0	0	0	0	0	0	0	0	1	0	2	7-14 marzo		1	2	3	4	5	0	0	0	9	0	0	12	13	14	0	16	0	0	0	0	21	0	23	24	25	26
764	1	43	4	1	0	0	0	0	0	0	0	0	0	0	0	0	0	0	1	0	2	7-14 marzo		1	0	3	4	5	6	7	8	9	10	0	12	13	14	0	16	0	0	0	0	21	0	0	24	25	26
446	0	57	4	1	1	2	0	4	5	6	0	8	0	0	0	0	0	0	1	0	2	2-6 marzo		1	0	3	4	5	6	0	0	9	10	11	0	13	14	0	0	17	0	0	0	21	0	0	24	25	26
2316	0	41	4	4	0	0	0	0	0	0	0	0	0	0	0	0	0	0	1	0	2	7-14 marzo		0	0	0	4	5	6	0	0	0	0	0	0	13	0	0	0	0	0	0	0	0	0	0	24	25	26
3574	0	53	4	4	0	0	0	0	0	0	0	0	0	0	0	0	0	0	1	0	2	7-14 marzo		1	2	3	4	5	6	0	0	9	0	11	12	13	14	0	0	0	0	19	0	21	22	0	0	25	26
746	0	55	4	4	0	0	0	0	0	0	0	0	0	0	0	0	0	0	1	0	2	2-6 marzo		1	2	3	4	5	6	7	8	9	10	0	12	13	14	15	0	0	0	0	0	21	22	0	24	25	26
1200	1	64	4	4	0	0	0	0	0	0	0	0	0	0	0	0	0	0	1	0	2	7-14 marzo		1	2	3	4	5	6	7	0	9	10	11	12	13	14	0	0	0	18	0	0	21	0	23	0	25	26
1684	0	67	4	4	0	0	0	0	0	0	0	0	0	0	0	0	0	0	1	0	2	7-14 marzo		0	2	0	0	0	0	0	0	0	0	0	0	0	0	0	0	0	0	0	0	0	0	0	0	0	0
2317	0	69	4	4	0	0	0	0	0	0	0	0	0	0	0	0	0	0	1	0	2	7-14 marzo		1	2	3	4	5	6	0	0	9	10	0	12	13	14	0	0	17	0	0	0	21	0	23	24	25	26
2597	0	50	4	4	0	0	0	0	0	0	0	0	0	0	0	0	0	0	1	0	2	2-6 marzo		1	2	3	4	5	6	7	0	9	10	0	12	13	14	0	16	17	0	0	0	21	0	0	24	25	26
3040	0	56	4	4	0	0	0	0	0	0	0	0	0	0	0	0	0	0	1	0	2	7-14 marzo		1	2	0	4	5	6	0	0	9	10	0	12	13	14	0	0	0	18	0	0	21	0	0	24	25	0
594	0	69	4	4	0	0	0	0	0	0	0	0	0	0	0	0	0	0	1	0	2	dopo il 14 marzo		1	2	0	4	5	6	0	0	9	10	11	12	13	14	0	16	0	0	0	0	21	22	0	0	25	26
3018	0	43	4	4	0	0	0	0	0	0	0	0	0	0	0	0	0	0	1	0	2	7-14 marzo		1	2	0	4	5	6	0	0	9	10	0	12	0	14	0	16	0	0	0	0	21	22	0	24	0	26
261	0	28	4	4	0	0	0	0	0	0	0	0	0	0	0	0	0	0	1	0	2	7-14 marzo		1	0	3	0	0	6	7	0	0	0	0	0	0	0	15	0	0	0	0	0	21	22	0	0	25	26
234	0	52	4	4	0	0	0	0	0	0	0	0	0	0	0	0	0	0	1	0	2	7-14 marzo		1	0	3	0	0	6	0	0	0	0	11	0	0	0	0	0	0	0	0	0	0	0	0	0	0	0
1739	0	58	4	4	0	0	0	0	0	0	0	0	0	0	0	0	0	0	1	0	2	7-14 marzo		1	2	3	4	5	6	0	0	9	10	11	12	13	14	15	16	0	0	0	0	21	0	0	24	25	26
2708	1	31	4	4	0	0	0	0	0	0	0	0	0	0	0	0	0	0	1	0	2	2-6 marzo		1	2	3	4	5	6	0	0	9	10	0	12	13	0	0	16	0	18	0	0	21	0	0	24	25	26
896	0	41	4	4	0	0	0	0	0	0	0	0	0	0	0	0	0	0	1	0	2	21-23 febbraio		1	0	3	0	0	0	7	0	0	0	0	12	13	14	0	16	0	0	0	0	0	0	0	0	0	0
1229	1	42	4	4	0	0	0	0	0	0	0	0	0	0	0	0	0	0	1	0	2	2-6 marzo		1	2	0	4	5	6	0	0	9	10	0	12	13	14	0	16	0	0	0	0	21	22	0	0	25	26
2345	1	53	4	4	0	0	0	0	0	0	0	0	0	0	0	0	0	0	1	0	2	7-14 marzo		1	2	0	4	5	6	0	0	9	10	0	12	13	0	15	16	0	0	0	0	21	0	23	0	25	26
748	0	55	4	4	0	0	0	0	0	0	0	0	0	0	0	0	0	0	1	0	2	21-23 febbraio		1	2	3	4	0	6	0	0	9	10	11	12	0	0	0	16	0	0	0	0	0	0	0	24	25	26
3289	0	61	4	4	0	0	0	0	0	0	0	0	0	0	0	0	0	0	1	0	2	7-14 marzo		1	2	3	4	5	6	0	0	0	10	0	12	13	14	0	0	0	0	0	0	21	0	23	0	25	26
2837	0	63	4	4	0	0	0	0	0	0	0	0	0	0	0	0	0	0	1	0	2	7-14 marzo		1	2	0	0	5	0	0	0	9	10	0	12	0	14	15	16	0	0	0	0	21	22	0	24	25	0
1056	0	65	4	4	0	0	0	0	0	0	0	0	0	0	0	0	0	0	1	0	2	21-23 febbraio		1	2	3	4	5	6	0	0	9	10	11	12	13	14	15	16	0	0	0	0	21	22	0	0	25	26
2975	0	48	4	4	0	0	0	0	0	0	0	0	0	0	0	0	0	0	1	0	2	7-14 marzo		1	2	0	0	5	6	0	8	9	10	0	12	13	14	0	16	0	0	0	0	21	22	0	0	25	26
1963	0	50	4	4	0	0	0	0	0	0	0	0	0	0	0	0	0	0	1	0	2	24 febbraio - 1 marzo		1	2	3	4	5	6	7	8	9	10	11	12	13	14	15	0	0	0	0	0	21	22	0	24	25	26
2304	0	31	4	4	0	0	0	0	0	0	0	0	0	0	0	0	0	0	1	0	2	7-14 marzo		0	2	0	0	5	6	7	0	9	10	0	12	0	0	15	0	0	0	0	0	0	0	0	24	25	0
3414	0	56	4	4	0	0	0	0	0	0	0	0	0	0	0	0	0	0	1	0	2	2-6 marzo		1	0	0	0	0	6	0	0	0	10	0	12	13	14	0	16	0	0	0	0	21	0	0	24	25	26
2504	0	43	4	4	0	0	0	0	0	0	0	0	0	0	0	0	0	0	1	0	2	2-6 marzo	2-6 marzo	1	2	0	4	5	6	0	0	9	10	0	12	13	14	0	16	0	0	0	0	21	22	0	0	25	26
1978	0	63	4	4	0	0	0	0	0	0	0	0	0	0	0	0	0	0	1	0	2	dopo il 14 marzo		0	2	3	0	5	6	0	0	9	10	0	12	13	14	0	0	0	18	0	0	21	22	0	0	25	26
2575	0	32	4	4	0	0	0	0	0	0	0	0	0	0	0	0	0	0	1	0	2	7-14 marzo		1	2	3	4	5	6	0	0	9	10	0	12	13	14	0	16	17	0	0	0	21	22	0	0	25	26
2866	1	57	4	4	0	0	0	0	0	0	0	0	0	0	0	0	0	0	1	0	2	2-6 marzo		1	2	3	4	5	6	0	0	9	10	11	12	13	14	0	16	0	0	0	0	21	22	0	0	25	26
2592	0	38	4	4	0	0	0	0	0	0	0	0	0	0	0	0	0	0	1	0	2	7-14 marzo		0	0	0	4	5	0	0	0	0	10	0	12	13	14	15	16	0	0	0	0	0	0	0	24	25	0
247	0	61	4	4	0	0	0	0	0	0	0	0	0	0	0	0	0	0	1	0	2	7-14 marzo		1	2	3	4	5	6	0	0	9	10	11	12	13	14	0	0	0	18	0	0	21	0	0	24	25	26
708	0	53	4	4	0	0	0	0	0	0	0	0	0	0	0	0	0	0	1	0	2	24 febbraio - 1 marzo		1	2	3	4	5	6	7	8	9	10	11	12	13	14	15	0	0	0	0	0	21	0	23	24	25	26
3180	0	69	4	4	0	0	0	0	0	0	0	0	0	0	0	0	0	0	1	0	2	7-14 marzo		1	0	0	4	5	0	0	0	9	10	0	12	13	14	0	16	0	0	0	0	0	22	23	0	0	26
3529	1	58	4	4	0	0	0	0	0	0	0	0	0	0	0	0	0	0	1	0	2	dopo il 14 marzo		1	2	3	4	5	6	0	0	9	10	11	12	13	14	0	0	17	0	0	0	21	22	23	0	25	26
2814	1	47	4	4	0	0	0	0	0	0	0	0	0	0	0	0	0	0	1	0	2	7-14 marzo		1	2	3	4	5	6	0	0	9	10	0	12	13	0	0	0	0	0	0	0	21	22	0	0	25	26
3825	0	50	4	4	0	0	0	0	0	0	0	0	0	0	0	0	0	0	1	0	2	7-14 marzo		1	2	3	4	5	0	0	0	9	10	11	12	13	14	0	0	0	18	0	0	21	0	0	24	25	26
1912	0	68	4	4	0	0	0	0	0	0	0	0	0	0	0	0	0	0	1	0	2	24 febbraio - 1 marzo		1	2	0	4	5	0	0	0	9	10	0	12	13	14	0	0	0	0	0	0	21	0	23	0	25	26
2352	1	62	4	4	0	0	0	0	0	0	0	0	0	0	0	0	0	0	1	0	2	2-6 marzo		0	0	0	0	0	0	0	0	0	0	0	0	0	0	0	0	0	0	0	0	0	0	0	0	0	0
3342	1	41	4	4	0	0	0	0	0	0	0	0	0	0	0	0	0	0	1	0	2	7-14 marzo		1	2	3	4	5	6	7	0	9	0	0	12	13	14	0	0	17	0	0	0	21	0	23	0	25	26
2282	0	45	4	4	0	0	0	0	0	0	0	0	0	0	0	0	0	0	1	0	2	24 febbraio - 1 marzo		1	2	3	4	5	6	7	8	9	10	11	12	13	14	15	16	0	0	0	0	21	0	0	24	25	26
625	0	61	4	4	0	0	0	0	0	0	0	0	0	0	0	0	0	0	1	0	2	24 febbraio - 1 marzo		0	2	0	4	0	6	7	8	9	10	0	12	13	14	0	16	0	0	0	0	21	0	0	24	25	26
3369	0	62	4	4	0	0	0	0	0	0	0	0	0	0	0	0	0	0	1	0	2	2-6 marzo		1	2	3	4	5	6	0	0	9	10	11	12	13	14	0	16	0	0	0	0	21	22	0	0	25	26
2740	0	38	4	4	0	0	0	0	0	0	0	0	0	0	0	0	0	0	1	0	2	2-6 marzo		1	2	0	0	0	6	0	0	9	10	0	12	13	14	15	16	0	0	0	0	21	22	23	24	25	26
2525	1	46	4	4	0	0	0	0	0	0	0	0	0	0	0	0	0	0	1	0	2	dopo il 14 marzo		1	2	3	4	5	0	0	0	9	10	0	12	13	14	15	0	0	0	0	0	0	0	23	0	25	0
2805	0	35	4	4	0	0	0	0	0	0	0	0	0	0	0	0	0	0	1	0	2	2-6 marzo		1	2	3	4	5	6	7	8	9	10	11	12	13	14	0	16	0	0	0	0	21	22	0	0	25	26
397	1	39	4	4	0	0	0	0	0	0	0	0	0	0	0	0	0	0	1	0	2	7-14 marzo		1	0	0	0	5	6	7	8	0	0	0	12	13	14	15	16	0	0	0	0	21	0	0	24	25	26
546	1	61	4	4	0	0	0	0	0	0	0	0	0	0	0	0	0	0	1	0	2	7-14 marzo		1	2	3	4	5	6	7	8	9	10	11	12	13	14	0	0	0	0	0	0	21	22	23	24	25	26
3170	0	36	4	4	1	2	0	4	5	0	7	0	0	10	11	12	0	14	1	0	2	2-6 marzo		1	2	3	4	5	6	0	0	9	10	0	12	13	14	0	16	0	0	0	0	21	0	23	0	25	26
2372	1	55	4	4	0	0	0	0	0	0	0	0	0	0	0	0	0	0	1	0	2	24 febbraio - 1 marzo		1	2	3	4	5	6	0	8	9	0	0	12	13	14	0	0	0	0	19	0	21	22	23	0	25	26
3378	0	51	4	4	0	0	0	0	0	0	0	0	0	0	0	0	0	0	1	0	2	7-14 marzo		1	0	0	0	0	6	0	0	9	10	0	12	13	0	0	0	0	0	0	0	0	0	0	24	25	0
1808	1	37	4	4	0	0	0	0	0	0	0	0	0	0	0	0	0	0	1	0	2	24 febbraio - 1 marzo		1	2	3	4	5	6	7	0	9	10	0	12	13	14	0	16	0	0	0	0	21	22	0	24	25	26
1111	1	40	4	4	0	0	0	0	0	0	0	0	0	0	0	0	0	0	1	0	2	7-14 marzo		1	2	3	4	5	6	0	0	9	10	0	12	13	14	0	16	0	0	0	0	21	22	23	0	25	26
1127	0	32	4	4	0	0	0	0	0	0	0	0	0	0	0	0	0	0	1	0	2	2-6 marzo		1	2	3	4	5	6	0	8	9	10	0	12	13	14	0	16	17	0	0	0	21	22	0	0	25	0
3722	0	37	4	4	0	0	0	0	0	0	0	0	0	0	0	0	0	0	1	0	2	7-14 marzo		1	2	3	4	5	6	7	0	9	10	0	12	13	14	15	0	0	0	0	0	21	22	0	0	25	26
3786	0	39	4	4	0	0	0	0	0	0	0	0	0	0	0	0	0	0	1	0	2	7-14 marzo		1	2	3	4	5	6	0	0	9	0	11	0	13	0	0	0	17	0	0	0	0	0	0	0	25	26
1318	0	45	4	4	0	0	0	0	0	0	0	0	0	0	0	0	0	0	1	0	2	7-14 marzo		1	2	3	4	5	6	0	0	9	10	0	12	13	14	0	16	0	0	0	0	21	22	0	0	25	26
2207	0	52	4	4	1	2	0	4	0	0	7	0	0	10	11	0	0	0	1	0	2	2-6 marzo		1	2	0	4	5	6	0	0	9	10	0	12	13	14	15	0	0	0	0	0	0	0	0	24	25	26
2168	0	65	4	4	0	0	0	0	0	0	0	0	0	0	0	0	0	0	1	0	2	21-23 febbraio		1	2	3	4	5	6	7	8	9	10	11	12	13	14	15	16	0	0	0	0	21	22	23	24	25	26
1781	0	54	4	4	0	0	0	0	0	0	0	0	0	0	0	0	0	0	1	0	2	7-14 marzo		1	2	0	4	5	6	0	0	0	10	0	12	13	14	15	16	0	0	0	0	21	22	23	24	25	26
3503	0	42	4	4	0	0	0	0	0	0	0	0	0	0	0	0	0	0	1	0	2	2-6 marzo		1	2	3	4	5	6	7	8	9	10	0	12	13	0	15	0	0	0	0	0	0	0	0	24	25	26
2004	0	54	4	4	0	0	0	0	0	0	0	0	0	0	0	0	0	0	1	0	2	7-14 marzo		1	2	3	4	5	6	7	8	9	10	0	12	13	14	0	0	0	18	0	0	21	0	0	24	25	26
1254	0	54	4	4	0	0	0	0	0	0	0	0	0	0	0	0	0	0	1	0	2	7-14 marzo		1	2	3	4	5	6	7	8	9	10	11	12	13	14	15	16	0	0	0	20	21	22	23	0	25	26
228	0	65	4	4	0	0	0	0	0	0	0	0	0	0	0	0	0	0	1	0	2	7-14 marzo		1	2	0	4	5	6	7	0	9	10	0	12	13	14	15	0	0	0	0	0	0	22	23	0	25	26
3700	0	42	4	4	0	0	0	0	0	0	0	0	0	0	0	0	0	0	1	0	2	2-6 marzo		1	2	3	4	5	6	0	0	9	0	0	12	13	14	0	16	0	0	0	0	0	22	23	0	25	26
2463	1	52	4	4	0	0	0	0	0	0	0	0	0	0	0	0	0	0	1	0	2	2-6 marzo		1	2	3	4	5	6	7	0	9	10	0	12	13	14	15	16	17	0	0	0	21	0	0	24	25	26
1359	0	62	4	4	0	0	0	0	0	0	0	0	0	0	0	0	0	0	1	0	2	21-23 febbraio		1	2	3	4	5	6	7	8	9	10	0	12	13	14	15	0	0	0	0	0	21	22	0	0	25	26
3389	1	55	4	4	0	0	0	0	0	0	0	0	0	0	0	0	0	0	1	0	2	7-14 marzo		0	2	3	4	5	6	0	0	0	0	0	12	13	14	0	16	0	0	0	0	21	0	0	24	25	26
1151	0	58	4	4	0	0	0	0	0	0	0	0	0	0	0	0	0	0	1	0	2	2-6 marzo		1	2	3	0	5	6	0	8	0	10	0	12	13	14	15	0	0	0	0	0	21	22	0	24	25	26
1336	0	36	4	4	0	0	0	0	0	0	0	0	0	0	0	0	0	0	1	0	2	2-6 marzo		1	2	3	4	5	6	0	0	9	10	0	12	13	14	0	16	0	0	0	0	21	22	0	24	25	26
3272	0	40	4	4	0	0	0	0	0	0	0	0	0	0	0	0	0	0	1	0	2	2-6 marzo		1	2	0	4	5	6	0	0	9	10	0	0	0	0	0	0	17	0	0	0	0	0	0	24	25	0
2219	0	32	4	4	0	0	0	0	0	0	0	0	0	0	0	0	0	0	1	0	2	7-14 marzo		1	2	0	4	5	6	0	0	9	10	0	12	13	0	15	0	0	0	0	0	21	22	0	24	25	26
3461	0	44	4	4	0	0	0	0	0	0	0	0	0	0	0	0	0	0	1	0	2	7-14 marzo		0	0	0	4	5	6	0	0	0	0	0	12	13	0	0	16	0	0	0	0	0	0	0	24	0	26
3637	0	43	4	4	0	0	0	0	0	0	0	0	0	0	0	0	0	0	1	0	2	dopo il 14 marzo		1	2	0	0	0	6	0	0	9	10	0	12	13	14	15	0	0	0	0	0	21	0	0	24	25	0
1574	0	66	4	4	0	0	0	0	0	0	0	0	0	0	0	0	0	0	1	0	2	7-14 marzo		1	2	3	4	5	6	0	0	9	10	11	12	13	14	0	0	0	18	0	0	21	22	0	0	25	26
3023	0	28	4	4	0	0	0	0	0	0	0	0	0	0	0	0	0	0	1	0	2	2-6 marzo		1	2	3	4	5	6	0	0	9	10	11	12	13	14	0	16	0	0	0	0	21	22	0	0	25	26
1965	0	26	4	4	0	0	0	0	0	0	0	0	0	0	0	0	0	0	1	0	2	2-6 marzo		0	0	0	0	0	0	0	0	0	0	0	0	0	0	0	0	0	0	0	0	0	0	0	0	0	0
2261	0	28	4	4	0	0	0	0	0	0	0	0	0	0	0	0	0	0	1	0	2	2-6 marzo		1	2	3	4	5	6	0	0	9	10	0	12	13	14	15	0	0	0	0	0	0	0	23	0	25	26
2691	0	31	4	4	0	0	0	0	0	0	0	0	0	0	0	0	0	0	1	0	2	7-14 marzo		1	2	0	0	0	0	0	0	9	0	0	12	13	0	0	16	0	0	0	0	0	0	0	24	25	26
2848	0	41	4	4	0	0	0	0	0	0	0	0	0	0	0	0	0	0	1	0	2	21-23 febbraio		1	2	0	4	5	6	7	8	9	0	0	12	13	14	15	0	0	0	0	0	21	22	0	0	25	26
251	1	42	4	4	0	0	0	0	0	0	0	0	0	0	0	0	0	0	1	0	2	24 febbraio - 1 marzo		1	2	0	4	5	0	0	0	9	10	0	12	13	0	0	0	0	0	0	0	21	0	0	24	25	26
2675	0	42	4	4	0	0	0	0	0	0	0	0	0	0	0	0	0	0	1	0	2	2-6 marzo		1	2	3	4	5	6	7	8	9	10	11	12	13	14	15	16	0	0	0	0	21	22	0	24	25	26
408	0	43	4	4	0	0	0	0	0	0	0	0	0	0	0	0	0	0	1	0	2	2-6 marzo		1	2	3	4	5	6	7	8	9	10	11	12	13	14	15	0	0	0	0	0	21	22	23	0	25	26
2536	0	52	4	4	0	0	0	0	0	0	0	0	0	0	0	0	0	0	1	0	2	2-6 marzo		1	2	0	0	0	0	7	0	9	0	0	12	13	0	0	0	17	18	0	0	21	22	0	0	25	26
334	0	53	4	4	0	0	0	0	0	0	0	0	0	0	0	0	0	0	1	0	2	7-14 marzo		0	2	3	4	5	0	0	0	9	10	0	12	13	14	0	16	0	0	0	0	0	0	0	24	25	26
2752	0	54	4	4	0	0	0	0	0	0	0	0	0	0	0	0	0	0	1	0	2	2-6 marzo		1	2	3	4	5	6	0	0	9	10	0	12	13	14	0	16	0	0	0	0	0	0	0	24	25	26
2878	1	54	4	4	0	0	0	0	0	0	0	0	0	0	0	0	0	0	1	0	2	7-14 marzo		1	2	3	4	5	6	0	0	9	10	0	12	13	14	15	0	0	18	0	0	21	22	0	24	25	26
3233	0	57	4	4	0	0	0	0	0	0	0	0	0	0	0	0	0	0	1	0	2	7-14 marzo		1	2	3	4	5	6	7	8	9	10	11	12	13	14	0	0	0	0	19	0	21	0	23	0	25	26
2036	0	58	4	4	0	0	0	0	0	0	0	0	0	0	0	0	0	0	1	0	2	7-14 marzo		1	0	0	4	5	6	0	0	9	10	0	12	13	14	0	16	0	0	0	0	0	22	23	0	0	26
2270	1	59	4	4	0	0	0	0	0	0	0	0	0	0	0	0	0	0	1	0	2	7-14 marzo		1	2	0	4	5	6	0	0	9	10	0	12	13	14	15	16	0	0	0	0	21	22	0	0	25	26
2204	0	62	4	4	0	0	0	0	0	0	0	0	0	0	0	0	0	0	1	0	2	2-6 marzo		1	0	0	4	5	6	0	0	0	10	0	12	13	14	0	0	0	0	0	20	21	0	0	24	25	26
2859	0	63	4	4	0	0	0	0	0	0	0	0	0	0	0	0	0	0	1	0	2	7-14 marzo		1	2	3	4	5	6	0	0	9	0	0	12	13	14	0	16	0	0	0	0	21	22	23	24	25	26
2953	1	66	4	4	0	0	0	0	0	0	0	0	0	0	0	0	0	0	1	0	2	7-14 marzo		1	2	3	4	5	6	7	0	9	10	11	12	13	14	15	16	0	0	0	0	21	0	23	0	25	26
514	0	69	4	4	0	0	0	0	0	0	0	0	0	0	0	0	0	0	1	0	2	2-6 marzo		1	2	3	4	5	6	0	0	9	10	0	12	13	14	0	16	0	0	0	0	21	22	0	0	25	26
2736	0	32	4	4	1	2	3	4	0	6	0	8	9	10	0	0	0	14	1	0	2	7-14 marzo		0	0	0	0	0	0	0	0	0	0	0	0	0	0	0	0	0	0	0	0	0	0	0	0	0	0
3664	1	46	4	4	1	0	0	0	0	0	0	0	0	0	0	12	13	0	1	0	2	7-14 marzo		0	0	0	0	0	0	0	0	0	0	11	0	0	0	0	0	0	0	0	0	0	0	0	0	0	0
2446	1	32	4	4	0	0	0	0	0	0	0	0	0	0	0	0	0	0	1	0	2	2-6 marzo		1	2	0	4	5	6	7	0	9	10	0	12	13	0	0	0	17	0	0	0	21	0	0	24	25	26
1655	0	62	4	4	0	0	0	0	0	0	0	0	0	0	0	0	0	0	1	0	2	7-14 marzo		1	2	3	4	5	6	7	8	9	10	0	12	13	14	15	16	0	0	0	0	21	22	23	24	25	26
2603	0	46	4	4	0	0	0	0	0	0	0	0	0	0	0	0	0	0	1	0	2	7-14 marzo		0	0	0	0	0	0	0	0	0	0	0	0	0	0	0	0	0	0	0	0	0	0	0	0	0	0
3481	1	31	4	4	0	0	0	0	0	0	0	0	0	0	0	0	0	0	1	0	2	7-14 marzo		1	2	3	4	5	6	0	0	9	10	11	12	13	14	0	16	0	0	0	0	21	22	0	24	25	26
3027	0	64	4	4	0	0	0	0	0	0	0	0	0	0	0	0	0	0	1	0	2	7-14 marzo		0	2	3	4	5	6	0	0	9	10	0	12	13	14	0	16	0	0	0	0	21	22	0	24	25	26
443	0	28	4	4	0	0	0	0	0	0	0	0	0	0	0	0	0	0	1	0	2	21-23 febbraio		1	2	3	4	5	6	0	8	9	10	11	12	0	14	0	0	0	0	0	0	21	22	0	24	25	26
2325	0	55	4	4	0	0	0	0	0	0	0	0	0	0	0	0	0	0	1	0	2	2-6 marzo		1	2	3	4	5	6	0	0	9	10	11	12	13	14	0	16	0	0	0	0	21	0	0	24	25	26
2001	0	59	4	4	0	0	0	0	0	0	0	0	0	0	0	0	0	0	1	0	2	7-14 marzo		1	2	0	4	5	6	0	0	9	10	0	12	13	14	0	16	0	0	0	0	21	0	23	24	25	26
3399	0	61	4	4	0	0	0	0	0	0	0	0	0	0	0	0	0	0	1	0	2	7-14 marzo		1	2	0	4	5	0	0	0	9	10	0	12	13	14	0	16	0	0	0	0	21	0	0	24	25	26
3537	0	45	4	4	0	0	0	0	0	0	0	0	0	0	0	0	0	0	1	0	2	24 febbraio - 1 marzo		1	2	3	4	5	6	7	8	9	10	11	12	13	14	0	0	0	18	0	0	21	0	0	24	25	26
3166	1	50	4	4	0	0	0	0	0	0	0	0	0	0	0	0	0	0	1	0	2	7-14 marzo		1	2	3	4	5	6	0	0	9	10	11	12	13	14	0	16	0	0	0	0	21	22	0	0	25	26
2379	1	28	4	4	0	0	0	0	0	0	0	0	0	0	0	0	0	0	1	0	2	7-14 marzo		1	0	0	0	0	6	0	0	9	0	0	0	13	14	0	0	0	18	0	0	0	22	0	0	25	26
2358	1	40	4	4	0	0	0	0	0	0	0	0	0	0	0	0	0	0	1	0	2	24 febbraio - 1 marzo		1	2	3	4	5	6	0	0	9	10	11	12	13	14	0	0	0	0	0	0	21	22	0	0	25	26
828	0	41	4	4	0	0	0	0	0	0	0	0	0	0	0	0	0	0	1	0	2	24 febbraio - 1 marzo		1	2	3	4	5	6	0	0	9	10	11	12	13	14	0	0	0	0	0	0	21	22	0	0	25	26
1875	0	38	4	4	0	0	0	0	0	0	0	0	0	0	0	0	0	0	1	0	2	24 febbraio - 1 marzo		1	2	3	4	5	6	7	8	9	10	11	12	13	14	0	0	0	18	0	0	21	0	23	0	25	26
453	1	34	4	4	0	0	0	0	0	0	0	0	0	0	0	0	0	0	1	0	2	2-6 marzo		0	2	3	4	5	6	0	0	9	10	0	12	13	14	0	16	0	0	0	0	21	22	0	24	25	26
2856	0	36	4	4	0	0	0	0	0	0	0	0	0	0	0	0	0	0	1	0	2	24 febbraio - 1 marzo		1	2	3	4	5	6	7	8	9	10	11	12	13	0	15	0	0	0	0	0	21	22	0	0	25	26
2662	0	38	4	4	1	0	3	0	5	0	0	0	9	0	0	0	0	0	1	0	2	7-14 marzo		1	2	0	0	0	6	0	8	9	10	0	12	13	14	15	16	0	0	0	0	21	22	23	0	25	26
2497	0	34	4	7	0	0	0	0	0	0	0	0	0	0	0	0	0	0	1	0	2	7-14 marzo		1	2	0	4	5	6	7	0	9	10	11	12	13	14	15	16	0	0	0	0	21	0	0	24	25	26
21	0	55	4	7	0	0	0	0	0	0	0	0	0	0	0	0	0	0	1	0	2	dopo il 14 marzo		1	2	0	4	5	6	0	0	9	10	0	12	13	14	0	0	0	0	19	0	21	0	23	0	25	26
3147	1	39	4	7	0	0	0	0	0	0	0	0	0	0	0	0	0	0	1	0	2	24 febbraio - 1 marzo		1	2	3	4	5	6	0	0	0	10	0	12	13	0	0	16	17	0	0	0	0	22	0	24	25	26
2735	0	56	4	7	1	0	3	4	5	6	7	0	9	0	0	0	0	0	1	0	2	7-14 marzo		1	2	0	4	0	6	0	0	9	10	0	12	13	0	0	0	0	0	19	0	21	0	0	24	25	26
3264	0	49	4	7	0	0	0	0	0	0	0	0	0	0	0	0	0	0	1	0	2	2-6 marzo		1	2	0	4	5	0	0	0	9	10	0	12	0	0	0	0	0	0	0	0	0	22	0	0	0	0
1503	1	41	4	8	0	0	0	0	0	0	0	0	0	0	0	0	0	0	1	0	2	2-6 marzo		1	2	3	4	5	6	7	0	9	10	0	12	13	0	15	0	0	0	0	0	0	22	0	24	25	26
1294	0	37	4	8	0	0	0	0	0	0	0	0	0	0	0	0	0	0	1	0	2	7-14 marzo		1	0	0	4	0	6	7	0	9	0	0	12	0	0	0	0	0	0	0	0	21	22	0	24	25	26
1511	0	58	4	8	0	0	0	0	0	0	0	0	0	0	0	0	0	0	1	0	2	24 febbraio - 1 marzo		1	2	3	4	5	6	7	8	9	10	0	12	13	14	15	0	0	0	0	0	21	0	0	24	25	26
2756	1	60	4	13	0	0	0	0	0	0	0	0	0	0	0	0	0	0	1	0	2	2-6 marzo		1	2	3	4	5	6	0	0	9	10	0	12	0	0	15	0	0	0	0	0	0	22	0	0	25	0
2471	1	26	4	13	0	0	0	0	0	0	0	0	0	0	0	0	0	0	1	0	2	7-14 marzo		1	2	0	0	5	0	0	0	9	10	0	0	13	0	0	0	0	0	0	0	0	0	0	0	25	26
194	0	61	4	13	0	0	0	0	0	0	0	0	0	0	0	0	0	0	1	0	2	7-14 marzo		1	2	3	4	5	6	0	0	9	10	11	12	13	14	0	0	0	18	0	0	21	22	0	0	25	26
290	0	68	8	1	0	0	0	0	0	0	0	0	0	0	0	0	0	0	1	0	2	2-6 marzo		1	0	0	4	5	6	0	8	9	10	0	12	13	14	15	16	0	0	0	0	21	0	0	24	25	26
1470	0	45	8	1	0	0	0	0	0	0	0	0	0	0	0	0	0	0	1	0	2	7-14 marzo		1	2	3	4	5	6	0	8	0	10	0	12	13	14	15	16	0	0	0	0	21	0	23	24	25	0
3791	0	55	8	1	0	0	0	0	0	0	0	0	0	0	0	0	0	0	1	0	2	7-14 marzo		1	2	0	4	5	6	0	0	0	10	0	12	13	0	0	0	0	0	0	0	0	0	0	24	25	26
3181	0	60	8	1	0	0	0	0	0	0	0	0	0	0	0	0	0	0	1	0	2	7-14 marzo		1	0	3	0	5	6	0	0	9	10	0	12	13	14	15	0	0	0	0	0	0	22	0	24	25	26
1869	1	31	8	1	0	0	0	0	0	0	0	0	0	0	0	0	0	0	1	0	2	2-6 marzo		1	2	3	4	5	6	0	8	9	10	0	12	13	14	15	0	0	0	0	0	21	22	0	24	25	26
3326	0	66	8	1	0	0	0	0	0	0	0	0	0	0	0	0	0	0	1	0	2	24 febbraio - 1 marzo		1	2	3	4	5	6	0	0	9	10	11	12	13	14	15	0	0	0	0	0	21	0	0	24	25	26
1980	0	38	8	1	0	0	0	0	0	0	0	0	0	0	0	0	0	0	1	0	2	dopo il 14 marzo		1	2	3	4	5	6	7	8	9	10	0	12	13	14	0	16	0	0	0	0	21	22	0	24	25	26
1238	0	59	8	1	0	0	0	0	0	0	0	0	0	0	0	0	0	0	1	0	2	7-14 marzo		1	2	0	4	5	6	0	0	9	10	11	12	13	14	15	0	0	0	0	0	21	22	0	24	25	26
3228	0	40	8	1	0	0	0	0	0	0	0	0	0	0	0	0	0	0	1	0	2	7-14 marzo		1	0	3	4	5	6	0	0	9	10	0	12	13	0	0	16	0	0	0	0	21	0	0	24	25	26
141	0	30	8	1	0	0	0	0	0	0	0	0	0	0	0	0	0	0	1	0	2	2-6 marzo		1	2	3	4	5	6	0	8	9	10	11	12	13	14	0	0	17	0	0	0	21	22	23	24	25	26
1520	0	27	8	1	1	2	3	4	0	6	0	0	0	0	11	0	0	0	1	0	2	24 febbraio - 1 marzo		1	2	0	4	5	6	0	0	9	10	0	0	0	0	0	0	0	18	0	0	21	22	0	0	25	26
1365	1	63	8	1	0	0	0	0	0	0	0	0	0	0	0	0	0	0	1	0	2	24 febbraio - 1 marzo		1	2	3	4	5	6	7	8	9	10	11	12	13	14	15	16	0	0	0	0	21	22	0	0	25	26
360	0	62	8	1	0	0	0	0	0	0	0	0	0	0	0	0	0	0	1	0	2	21-23 febbraio		1	2	3	4	0	6	7	8	9	10	0	12	13	14	15	16	0	0	0	0	21	22	23	0	25	26
1384	0	66	8	1	0	0	0	0	0	0	0	0	0	0	0	0	0	0	1	0	2	dopo il 14 marzo		1	2	0	4	5	6	0	0	0	0	11	12	0	0	0	16	0	0	0	0	21	0	23	0	25	26
173	1	33	8	1	0	0	0	0	0	0	0	0	0	0	0	0	0	0	1	0	2	7-14 marzo		1	2	3	4	5	6	7	8	9	10	11	12	13	14	0	16	0	0	0	0	21	0	23	24	25	0
1536	0	29	8	1	0	0	0	0	0	0	0	0	0	0	0	0	0	0	1	0	2	7-14 marzo		0	0	0	0	0	0	0	0	0	0	0	0	0	0	0	0	0	0	0	0	0	0	0	0	0	0
1087	0	66	8	3	0	0	0	0	0	0	0	0	0	0	0	0	0	0	1	0	2	7-14 marzo		1	0	0	0	0	6	0	0	0	10	0	0	0	14	0	16	0	0	0	0	0	0	0	24	25	26
1501	0	50	8	3	0	0	0	0	0	0	0	0	0	0	0	0	0	0	1	0	2	7-14 marzo		1	2	3	4	5	6	7	0	0	0	0	12	13	14	0	16	0	0	0	0	21	0	0	24	25	26
1656	0	59	8	3	0	0	0	0	0	0	0	0	0	0	0	0	0	0	1	0	2	24 febbraio - 1 marzo		1	2	3	4	5	6	0	8	9	10	0	12	13	14	0	0	0	0	0	0	21	0	0	24	25	26
1518	0	31	8	3	0	0	0	0	0	0	0	0	0	0	0	0	0	0	1	0	2	7-14 marzo		1	2	3	4	5	6	7	8	9	10	11	12	13	14	15	16	17	0	0	0	21	22	23	0	25	26
2528	0	51	8	3	0	0	0	0	0	0	0	0	0	0	0	0	0	0	1	0	2	2-6 marzo		1	2	3	0	5	0	0	8	0	10	0	12	13	14	0	0	17	0	0	0	21	22	0	0	25	26
1651	0	63	8	3	0	0	0	0	0	0	0	0	0	0	0	0	0	0	1	0	2	2-6 marzo		1	2	3	4	5	6	0	0	9	10	11	12	13	0	15	0	0	0	0	0	21	0	23	0	25	26
167	0	26	8	4	0	0	0	0	0	0	0	0	0	0	0	0	0	0	1	0	2	21-23 febbraio		1	2	3	4	0	6	0	0	9	10	0	12	13	14	0	16	0	0	0	0	0	0	0	24	25	26
302	1	32	8	4	0	0	0	0	0	0	0	0	0	0	0	0	0	0	1	0	2	7-14 marzo		1	0	3	4	5	6	0	0	9	0	0	12	0	0	0	16	0	0	0	0	21	0	0	24	25	0
1489	0	62	8	6	0	0	0	0	0	0	0	0	0	0	0	0	0	0	1	0	2	2-6 marzo		1	2	3	4	5	6	7	8	9	10	0	12	13	14	0	16	0	0	0	0	21	22	23	24	25	26
280	0	31	8	6	0	0	0	0	0	0	0	0	0	0	0	0	0	0	1	0	2	24 febbraio - 1 marzo		1	2	3	4	5	6	0	8	9	10	0	12	13	14	0	0	0	0	0	0	21	22	23	24	25	26
1741	0	37	8	7	0	0	0	0	0	0	0	0	0	0	0	0	0	0	1	0	2	2-6 marzo		1	2	3	4	5	6	7	8	9	10	11	12	13	14	15	0	0	0	0	0	21	22	0	0	25	26
780	1	52	8	7	0	0	0	0	0	0	0	0	0	0	0	0	0	0	1	0	2	7-14 marzo		1	2	3	4	5	6	0	0	9	10	0	12	13	14	0	16	0	18	0	0	21	0	0	24	25	26
3104	1	58	8	7	0	0	0	0	0	0	0	0	0	0	0	0	0	0	1	0	2	7-14 marzo		1	2	0	0	5	6	0	0	0	0	0	12	0	14	0	16	0	0	0	0	21	22	0	0	25	0
108	1	27	8	7	1	0	3	4	0	6	0	8	0	0	0	0	0	0	1	0	2	2-6 marzo		1	2	0	0	0	0	0	0	9	0	0	0	13	0	0	16	0	0	0	0	0	22	0	0	25	0
738	0	64	8	7	0	0	0	0	0	0	0	0	0	0	0	0	0	0	1	0	2	2-6 marzo		1	2	3	4	5	6	0	0	0	10	0	12	13	14	0	16	0	0	19	0	21	22	0	24	25	26
1105	0	55	8	8	0	0	0	0	0	0	0	0	0	0	0	0	0	0	1	0	2	24 febbraio - 1 marzo		1	2	3	4	5	6	0	0	9	10	0	12	13	14	0	16	0	0	0	0	21	0	0	24	25	0
506	0	60	8	8	0	0	0	0	0	0	0	0	0	0	0	0	0	0	2	0	2	24 febbraio - 1 marzo		1	2	3	4	5	6	0	8	9	10	11	12	13	14	0	16	0	0	0	0	21	22	23	0	25	26
857	0	33	8	8	0	0	0	0	0	0	0	0	0	0	0	0	0	0	1	0	2	7-14 marzo		1	2	3	4	5	6	0	0	9	10	0	12	13	0	0	0	17	0	0	0	21	0	0	24	25	26
1612	0	59	8	8	0	0	0	0	0	0	0	0	0	0	0	0	0	0	1	0	2	7-14 marzo		1	2	3	4	5	0	0	0	9	10	0	12	0	14	0	16	0	0	0	0	21	0	0	24	25	26
1456	1	62	8	8	0	0	0	0	0	0	0	0	0	0	0	0	0	0	1	0	2	7-14 marzo		1	0	0	0	0	6	7	8	9	0	11	12	0	0	0	16	0	0	0	0	21	0	23	24	25	0
1486	0	53	8	8	0	0	0	0	0	0	0	0	0	0	0	0	0	0	1	0	2	24 febbraio - 1 marzo		1	0	3	4	5	6	7	8	9	10	0	12	13	14	15	0	0	0	0	0	21	0	0	24	25	26
1461	0	29	8	8	0	0	0	0	0	0	0	0	0	0	0	0	0	0	1	0	2	7-14 marzo		1	2	3	0	5	6	0	0	9	10	11	12	13	0	0	16	0	18	0	0	21	0	23	0	25	0
126			8	8	0	0	0	0	0	0	0	0	0	0	0	0	0	0	1	0	2	2-6 marzo		1	0	3	4	5	6	0	0	9	0	0	12	13	14	15	16	0	0	0	0	21	0	0	24	25	26
1469	0	28	8	8	0	0	0	0	0	0	0	0	0	0	0	0	0	0	1	0	2	24 febbraio - 1 marzo		1	2	3	4	5	6	0	8	9	10	11	12	13	14	0	16	0	0	0	0	21	0	0	24	25	26
1512	0	46	8	8	1	0	0	4	5	6	7	0	0	0	11	0	0	14	1	0	2	21-23 febbraio		1	2	0	4	5	6	0	0	0	10	0	12	13	14	0	16	0	0	0	0	0	0	0	24	25	26
912	1	51	8	8	0	0	0	0	0	0	0	0	0	0	0	0	0	0	1	0	2	2-6 marzo		1	2	3	4	5	6	0	0	9	10	11	12	13	14	15	0	0	0	19	0	21	0	0	24	25	26
1245	0	56	8	8	0	0	0	0	0	0	0	0	0	0	0	0	0	0	1	0	2	21-23 febbraio		1	2	0	0	0	0	0	0	9	10	0	12	13	0	0	16	0	0	0	0	21	0	0	24	25	26
681	0	58	8	8	0	0	0	0	0	0	0	0	0	0	0	0	0	0	1	0	2	24 febbraio - 1 marzo		1	2	3	4	5	6	0	0	9	10	0	12	13	14	0	16	0	0	0	0	21	0	0	24	25	26
278	0	48	8	8	0	0	0	0	0	0	0	0	0	0	0	0	0	0	1	0	2	7-14 marzo		1	2	3	4	5	6	0	0	9	10	11	12	13	14	15	16	0	0	0	0	21	22	0	0	25	26
329	0	49	8	8	0	0	0	0	0	0	0	0	0	0	0	0	0	0	1	0	2	24 febbraio - 1 marzo		1	2	3	4	5	6	0	0	9	10	11	12	13	14	15	0	0	0	0	0	21	0	0	24	25	26
1048	0	52	8	8	0	0	0	0	0	0	0	0	0	0	0	0	0	0	1	0	2	7-14 marzo		1	2	3	4	5	6	0	0	9	10	0	12	13	14	0	16	0	0	19	0	21	0	0	24	25	26
1530	0	47	8	8	0	0	0	0	0	0	0	0	0	0	0	0	0	0	1	0	2	2-6 marzo		1	2	3	4	5	6	7	8	9	10	11	12	13	14	15	16	0	0	0	0	21	22	0	0	25	26
197	1	28	8	8	0	0	0	0	0	0	0	0	0	0	0	0	0	0	1	0	2	7-14 marzo		0	2	3	4	5	6	0	0	9	10	0	12	13	0	0	16	0	0	0	0	21	0	0	24	0	26
1418	0	35	8	8	0	0	0	0	0	0	0	0	0	0	0	0	0	0	1	0	2	7-14 marzo		1	2	3	4	5	6	0	8	9	10	11	12	13	14	15	0	0	0	0	0	21	0	0	24	25	26
1211	0	62	8	8	0	0	0	0	0	0	0	0	0	0	0	0	0	0	1	0	2	7-14 marzo		1	2	3	4	5	6	7	8	9	10	11	12	13	14	15	0	0	0	0	0	21	0	0	24	25	26
1032	0	46	8	8	0	0	0	0	0	0	0	0	0	0	0	0	0	0	1	0	2	2-6 marzo		1	2	3	4	5	6	0	0	0	10	11	12	13	14	0	16	0	0	0	0	21	0	0	24	25	26
739	0	62	8	8	0	0	0	0	0	0	0	0	0	0	0	0	0	0	1	0	2	7-14 marzo		0	0	0	4	5	0	0	0	9	10	0	12	0	14	0	16	0	0	0	0	0	0	23	0	25	26
39	0	37	8	8	0	0	0	0	0	0	0	0	0	0	0	0	0	0	1	0	2	24 febbraio - 1 marzo		1	2	0	0	0	0	0	0	0	0	0	0	0	0	15	0	0	0	0	0	0	0	0	0	25	0
1170	0	38	8	8	0	0	0	0	0	0	0	0	0	0	0	0	0	0	1	0	2	2-6 marzo		0	0	0	0	0	0	0	0	0	0	0	0	0	0	0	0	0	0	0	0	0	0	0	0	0	0
264	1	30	8	8	0	0	0	0	0	0	0	0	0	0	0	0	0	0	1	0	2	7-14 marzo		1	2	3	4	5	6	0	0	9	10	0	12	13	0	15	0	0	0	0	0	21	0	0	24	25	26
2285	0	54	8	8	0	0	0	0	0	0	0	0	0	0	0	0	0	0	1	0	2	24 febbraio - 1 marzo		1	2	3	4	5	6	0	0	9	10	0	12	13	14	0	16	0	0	0	0	21	0	0	24	25	26
1161	1	28	8	8	1	0	0	0	0	0	0	0	0	0	0	0	13	0	1	0	2	7-14 marzo		1	2	3	4	5	6	0	0	9	0	0	12	13	14	0	16	0	0	0	0	21	0	0	24	25	26
2429	1	58	8	8	1	2	3	4	0	0	7	0	0	10	0	12	0	0	1	0	2	7-14 marzo		0	2	3	4	5	6	0	0	9	10	0	12	13	14	0	0	0	0	0	0	21	0	0	24	25	26
1463	0	64	8	8	0	0	0	0	0	0	0	0	0	0	0	0	0	0	1	0	2	dopo il 14 marzo		0	2	3	0	0	6	0	0	0	10	0	12	13	14	0	16	0	0	0	0	21	0	0	24	25	26
817	1	61	8	8	0	0	0	0	0	0	0	0	0	0	0	0	0	0	1	0	2	21-23 febbraio		1	2	0	4	5	0	0	0	0	0	0	12	13	14	0	16	0	0	0	0	0	22	0	24	0	26
1329	0	60	8	8	0	0	0	0	0	0	0	0	0	0	0	0	0	0	1	0	2	2-6 marzo		0	2	3	4	5	6	0	0	9	10	0	12	13	14	0	0	0	0	0	20	21	22	0	0	25	26
72	0	57	8	8	0	0	0	0	0	0	0	0	0	0	0	0	0	0	1	0	2	24 febbraio - 1 marzo		0	0	0	0	0	0	0	0	0	0	0	0	0	0	0	0	0	0	0	0	0	0	0	0	0	0
1399	1	42	8	8	0	0	0	0	0	0	0	0	0	0	0	0	0	0	1	0	2	24 febbraio - 1 marzo		1	2	3	4	5	6	0	0	9	10	0	12	13	14	15	16	0	0	0	0	21	22	23	24	25	26
1334	0	42	8	8	0	0	0	0	0	0	0	0	0	0	0	0	0	0	1	0	2	7-14 marzo		1	2	3	4	5	6	0	0	9	10	0	12	13	14	0	16	0	0	0	0	21	0	0	24	25	26
1565	0	42	8	8	0	0	0	0	0	0	0	0	0	0	0	0	0	0	1	0	2	7-14 marzo		1	2	3	4	5	6	0	0	0	10	0	12	13	14	0	16	0	0	0	0	0	0	0	24	25	26
902	0	45	8	8	0	0	0	0	0	0	0	0	0	0	0	0	0	0	1	0	2	2-6 marzo		1	2	3	4	5	6	0	0	9	10	0	12	13	14	0	0	0	0	0	0	21	22	0	24	25	26
1527	0	43	8	8	0	0	0	0	0	0	0	0	0	0	0	0	0	0	1	0	2	2-6 marzo		1	2	3	4	5	6	0	0	9	10	0	12	13	14	0	16	0	0	0	0	21	0	0	24	25	26
1158	0	53	8	8	0	0	0	0	0	0	0	0	0	0	0	0	0	0	1	0	2	2-6 marzo		1	2	3	4	5	6	0	0	9	10	11	12	13	14	15	16	0	0	0	0	21	22	0	24	25	26
997	0	49	8	8	0	0	0	0	0	0	0	0	0	0	0	0	0	0	1	0	2	7-14 marzo		1	2	0	4	5	6	0	0	9	10	0	12	13	14	0	16	0	0	0	0	21	22	0	24	25	26
1069	1	48	8	8	1	0	0	0	0	0	0	0	9	0	0	0	0	0	1	0	2	7-14 marzo		1	2	3	4	5	6	7	8	9	10	0	12	13	14	0	16	0	0	0	0	21	0	23	24	25	26
1122	0	44	8	8	0	0	0	0	0	0	0	0	0	0	0	0	0	0	1	0	2	7-14 marzo		1	2	3	4	5	6	0	0	9	10	0	12	13	14	0	16	0	0	0	0	21	0	23	0	25	26
481	0	47	8	8	0	0	0	0	0	0	0	0	0	0	0	0	0	0	1	0	2	7-14 marzo		0	2	3	0	0	6	0	0	0	0	0	0	0	0	0	0	0	0	0	0	0	0	0	0	0	0
15	0	63	8	8	0	0	0	0	0	0	0	0	0	0	0	0	0	0	1	0	2	7-14 marzo		1	2	3	4	5	6	7	8	9	10	0	12	13	14	0	16	0	18	0	0	0	0	0	24	25	26
767	0	43	8	8	0	0	0	0	0	0	0	0	0	0	0	0	0	0	1	0	2	7-14 marzo		1	2	3	4	5	6	0	0	9	10	11	0	0	0	15	0	0	0	0	0	21	0	0	24	25	26
1338	0	27	8	8	0	0	0	0	0	0	0	0	0	0	0	0	0	0	1	0	2	21-23 febbraio		1	2	3	4	5	6	0	0	9	10	11	12	13	14	0	16	0	0	0	0	0	22	0	24	25	26
1533	1	36	8	8	1	2	0	4	0	0	0	0	0	0	0	0	0	0	1	0	2	2-6 marzo		1	2	0	4	5	0	0	0	9	0	0	0	13	0	0	16	0	0	0	0	21	22	23	0	25	26
1475	0	57	8	8	0	0	0	0	0	0	0	0	0	0	0	0	0	0	1	0	2	7-14 marzo		1	2	3	4	5	6	0	8	9	10	0	12	13	14	0	16	0	0	0	0	21	0	0	24	0	26
1169	0	50	8	8	0	0	0	0	0	0	0	0	0	0	0	0	0	0	1	0	2	7-14 marzo		1	2	0	4	5	0	0	0	9	10	11	12	13	14	0	0	0	0	0	0	0	0	0	24	25	0
644	1	39	8	8	0	0	0	0	0	0	0	0	0	0	0	0	0	0	1	0	2	24 febbraio - 1 marzo		1	2	3	4	5	6	7	0	9	10	11	12	13	14	15	0	0	0	0	0	21	22	0	24	25	26
1517	0	52	8	8	0	0	0	0	0	0	0	0	0	0	0	0	0	0	1	0	2	7-14 marzo		1	2	3	4	5	6	0	0	9	10	0	0	13	0	15	0	0	0	0	0	21	0	0	24	25	26
2377	0	52	8	8	1	2	0	4	0	6	0	0	9	10	0	0	0	0	1	0	2	7-14 marzo		0	0	3	4	5	6	0	0	0	0	11	12	13	14	0	16	0	0	0	0	0	22	0	0	25	0
354	0	38	8	8	0	0	0	0	0	0	0	0	0	0	0	0	0	0	1	0	2	7-14 marzo		1	2	3	4	5	6	0	0	9	10	11	12	13	14	15	0	17	0	0	0	21	22	0	0	25	26
568	1	41	8	8	0	0	0	0	0	0	0	0	0	0	0	0	0	0	1	0	2	7-14 marzo		1	2	3	4	5	6	7	8	9	10	11	12	13	14	0	16	0	0	0	0	21	0	0	24	25	26
561	0	55	8	8	0	0	0	0	0	0	0	0	0	0	0	0	0	0	1	0	2	2-6 marzo		1	0	0	4	5	6	7	8	9	10	11	12	13	14	0	16	0	0	0	0	21	0	23	0	25	26
3650	0	57	8	8	0	0	0	0	0	0	0	0	0	0	0	0	0	0	1	0	2	7-14 marzo		1	2	3	4	5	6	0	0	9	10	11	12	13	14	15	16	0	0	0	0	21	0	23	24	25	26
1153	0	65	8	8	0	0	0	0	0	0	0	0	0	0	0	0	0	0	1	0	2	7-14 marzo		1	2	0	4	5	6	7	0	9	0	11	12	13	14	15	0	0	0	0	0	21	22	0	0	25	26
2748	1	34	8	8	0	0	0	0	0	0	0	0	0	0	0	0	0	0	1	0	2	dopo il 14 marzo		1	2	0	4	5	6	0	0	0	10	11	12	0	14	0	0	0	0	0	0	21	0	23	0	25	26
168	0	62	8	8	0	0	0	0	0	0	0	0	0	0	0	0	0	0	1	0	2	dopo il 14 marzo		1	2	3	4	5	6	7	8	9	10	11	12	13	14	15	16	17	0	0	0	21	22	23	0	25	26
1285	1	47	8	8	0	0	0	0	0	0	0	0	0	0	0	0	0	0	1	0	2	7-14 marzo		0	2	3	0	0	6	0	0	9	10	0	12	13	0	0	16	0	0	0	0	21	0	0	24	25	26
1495	0	47	8	8	0	0	0	0	0	0	0	0	0	0	0	0	0	0	1	0	2	7-14 marzo		1	2	0	4	5	6	0	0	9	10	0	0	0	0	0	16	0	0	0	0	21	22	0	0	25	0
1011	0	52	8	8	0	0	0	0	0	0	0	0	0	0	0	0	0	0	1	0	2	2-6 marzo		1	2	0	4	5	6	0	0	9	10	11	12	13	14	15	0	0	0	0	20	21	22	0	0	25	26
1523	1	26	8	8	0	0	0	0	0	0	0	0	0	0	0	0	0	0	1	0	2	2-6 marzo		1	2	0	4	5	6	7	8	9	10	0	12	13	14	0	16	0	0	0	0	21	22	0	0	25	26
1524	1	43	8	8	0	0	0	0	0	0	0	0	0	0	0	0	0	0	1	0	2	7-14 marzo		1	2	3	4	5	6	7	8	9	10	11	12	13	14	15	0	0	0	0	0	21	22	0	24	25	26
744	0	66	8	8	0	0	0	0	0	0	0	0	0	0	0	0	0	0	1	0	2	7-14 marzo		0	0	0	0	0	0	0	0	0	0	0	0	0	0	0	0	0	0	0	0	0	0	0	0	0	0
2073	0	54	8	8	0	0	0	0	0	0	0	0	0	0	0	0	0	0	1	0	2	2-6 marzo		0	0	0	0	0	0	0	0	0	0	0	0	0	0	0	0	0	0	0	0	0	0	0	0	0	0
2760	0	28	8	8	0	0	0	0	0	0	0	0	0	0	0	0	0	0	1	0	2	dopo il 14 marzo		1	2	3	4	5	6	7	8	9	10	0	12	13	14	0	0	0	0	0	0	21	22	0	24	25	26
422	0	40	8	8	0	0	0	0	0	0	0	0	0	0	0	0	0	0	2	0	2	24 febbraio - 1 marzo		1	2	3	4	5	6	0	0	9	10	11	12	13	14	0	16	0	0	0	0	21	22	0	0	25	0
941	1	40	8	8	0	0	0	0	0	0	0	0	0	0	0	0	0	0	1	0	2	7-14 marzo		1	2	0	4	5	6	0	0	9	10	0	12	13	0	15	0	17	0	0	0	21	22	23	24	25	26
1039	0	55	8	8	0	0	0	0	0	0	0	0	0	0	0	0	0	0	1	0	2	7-14 marzo		1	2	3	4	5	6	0	0	9	10	0	12	13	14	15	16	0	0	0	0	21	0	0	24	25	26
3189	0	56	8	8	0	0	0	0	0	0	0	0	0	0	0	0	0	0	1	0	2	7-14 marzo		1	2	0	4	5	6	0	0	9	0	0	12	0	0	15	0	0	0	0	0	21	0	23	24	25	26
529	0	57	8	8	0	0	0	0	0	0	0	0	0	0	0	0	0	0	1	0	2	dopo il 14 marzo		0	2	0	0	5	0	0	0	0	0	0	0	0	0	15	16	0	0	0	0	0	0	0	0	0	0
1681	0	57	8	8	0	0	0	0	0	0	0	0	0	0	0	0	0	0	1	0	2	24 febbraio - 1 marzo		1	2	0	4	5	6	7	8	9	10	0	12	13	14	0	16	0	0	0	0	21	22	0	0	25	26
419	0	59	8	8	0	0	0	0	0	0	0	0	0	0	0	0	0	0	1	0	2	7-14 marzo		1	2	0	4	5	6	0	0	9	10	0	12	13	14	0	16	0	0	0	0	21	0	23	0	25	26
215	1	60	8	8	0	0	0	0	0	0	0	0	0	0	0	0	0	0	1	0	2	7-14 marzo		1	2	3	4	5	6	0	0	9	10	0	12	13	14	0	16	0	0	0	0	21	0	23	24	25	26
214	0	61	8	8	0	0	0	0	0	0	0	0	0	0	0	0	0	0	1	0	2	7-14 marzo		1	2	0	4	5	6	0	0	9	10	0	12	13	0	0	16	0	0	0	0	21	0	23	24	25	26
46	1	57	8	8	1	0	3	4	0	0	7	0	0	10	11	0	0	0	1	0	2	2-6 marzo		1	2	3	4	5	6	0	0	9	10	11	12	13	14	0	16	0	0	0	0	21	22	0	24	25	26
838	0	54	8	8	1	2	3	4	0	0	0	0	9	10	11	12	0	14	1	0	2	7-14 marzo		1	2	3	4	5	6	0	0	9	10	0	12	13	0	0	16	0	18	0	0	21	0	0	24	25	26
1460	0	60	8	13	0	0	0	0	0	0	0	0	0	0	0	0	0	0	1	0	2	dopo il 14 marzo		0	0	3	4	0	6	7	0	9	0	11	0	13	14	15	16	0	0	0	0	0	22	0	0	25	0
1208	0	50	8		0	0	0	0	0	0	0	0	0	0	0	0	0	0	1	0	2	7-14 marzo		0	0	0	0	0	6	0	0	0	0	0	0	0	0	0	0	0	0	0	0	0	0	0	0	0	0
407	0	30	9	9	0	0	0	0	0	0	0	0	0	0	0	0	0	0	1	0	2	7-14 marzo		1	2	3	4	5	6	7	8	9	10	11	12	13	14	15	0	0	0	0	0	21	22	0	0	25	26
3313	0	41	9	9	0	0	0	0	0	0	0	0	0	0	0	0	0	0	1	0	2	2-6 marzo		1	2	3	4	5	6	7	8	9	10	11	12	13	14	0	0	0	18	0	0	21	0	0	24	25	26
1389	1	49	9	9	0	0	0	0	0	0	0	0	0	0	0	0	0	0	1	0	2	2-6 marzo		1	2	3	4	5	6	0	0	9	10	0	12	13	14	15	0	0	0	0	0	21	22	0	0	25	26
2399	1	55	9	9	0	0	0	0	0	0	0	0	0	0	0	0	0	0	1	0	2	2-6 marzo		1	2	3	4	5	6	7	0	9	0	0	12	13	14	0	16	0	0	0	0	21	0	23	0	25	26
2812	0	57	9	9	0	0	0	0	0	0	0	0	0	0	0	0	0	0	1	0	2	2-6 marzo		1	2	3	0	0	0	0	0	0	10	0	0	13	0	0	0	0	0	0	0	21	0	0	24	25	26
3107	1	60	9	9	0	0	0	0	0	0	0	0	0	0	0	0	0	0	1	0	2	dopo il 14 marzo		1	2	3	4	5	6	0	0	9	10	0	12	13	0	0	16	0	0	0	0	21	22	0	24	25	26
2794	0	60	9	9	0	0	0	0	0	0	0	0	0	0	0	0	0	0	1	0	2	dopo il 14 marzo		1	0	0	4	5	6	0	0	9	10	0	12	0	14	0	16	0	0	0	0	21	22	0	0	25	26
3151	0	62	9	9	0	0	0	0	0	0	0	0	0	0	0	0	0	0	1	0	2	7-14 marzo		1	2	0	4	5	6	0	0	9	10	0	12	13	14	0	16	0	0	0	0	21	0	0	24	25	26
2065	0	62	9	9	0	0	0	0	0	0	0	0	0	0	0	0	0	0	1	0	2	21-23 febbraio		0	0	0	0	0	0	0	0	0	0	0	0	0	0	0	0	0	0	0	0	0	0	0	0	0	0
3347	0	66	9	9	0	0	0	0	0	0	0	0	0	0	0	0	0	0	1	0	2	2-6 marzo		1	2	3	4	5	6	7	8	9	10	11	12	13	14	15	0	0	0	0	0	21	22	0	0	25	26
1060	0	66	9	9	0	0	0	0	0	0	0	0	0	0	0	0	0	0	1	0	2	2-6 marzo		1	0	0	4	0	6	7	8	9	0	0	12	13	0	0	16	0	0	0	0	21	22	0	24	25	26
3041	0	68	9	9	0	0	0	0	0	0	0	0	0	0	0	0	0	0	1	0	2	7-14 marzo		1	2	3	4	5	6	0	0	9	10	0	12	13	14	0	16	0	0	0	0	21	0	0	24	25	26
2280	1	69	9	9	0	0	0	0	0	0	0	0	0	0	0	0	0	0	1	0	2	7-14 marzo		0	2	3	4	5	6	0	0	9	0	0	12	0	14	0	0	17	0	0	0	0	22	0	0	25	26
1090	0	47	9	9	1	2	3	4	5	6	7	8	0	0	0	0	0	0	1	0	2	2-6 marzo		0	2	0	0	0	0	0	0	9	10	0	12	13	0	0	0	0	0	0	0	21	0	0	24	25	0
2028	0	49	13	10	0	0	0	0	0	0	0	0	0	0	0	0	0	0	1	0	2	7-14 marzo		1	2	3	4	5	6	0	0	9	10	0	12	13	14	15	0	0	0	0	0	21	0	0	24	25	26
3801	0	61	13	1	0	0	0	0	0	0	0	0	0	0	0	0	0	0	1	0	2	7-14 marzo		1	2	3	4	5	6	0	8	9	10	0	12	13	14	15	0	0	0	0	0	21	0	23	24	25	26
571	0	26	13	4	0	0	0	0	0	0	0	0	0	0	0	0	0	0	1	0	2	21-23 febbraio		1	2	3	4	5	6	7	8	9	10	11	12	13	14	15	16	0	0	0	0	21	22	0	0	25	26
1404	0	29	4	4	0	0	0	0	0	0	0	0	0	0	0	0	0	0	1	0	2	24 febbraio - 1 marzo		1	2	3	4	5	6	7	8	9	10	11	12	13	14	0	16	0	0	0	0	21	22	0	0	25	26
2390	0	64	4	4	0	0	0	0	0	0	0	0	0	0	0	0	0	0	1	0	2	7-14 marzo		1	2	0	4	5	6	7	8	9	10	0	12	0	0	15	16	0	0	0	0	21	0	0	24	25	26
2290	0	62	4	4	0	0	0	0	0	0	0	0	0	0	0	0	0	0	1	0	2	2-6 marzo		1	2	3	4	5	6	0	0	9	10	11	12	13	14	0	16	0	0	0	0	21	0	0	24	25	26
3455	0	34	4	4	1	2	0	0	5	6	7	8	0	10	11	0	0	14	1	0	2	7-14 marzo		1	2	3	4	5	6	0	0	9	10	0	12	13	14	15	16	0	0	0	0	21	0	0	24	25	26
864	0	36	4	4	0	0	0	0	0	0	0	0	0	0	0	0	0	0	1	0	2	7-14 marzo		1	2	0	4	5	0	0	0	9	10	0	12	13	14	0	0	17	0	0	0	21	0	23	0	25	26
2235	0	51	4	4	0	0	0	0	0	0	0	0	0	0	0	0	0	0	1	0	2	7-14 marzo		1	2	0	4	5	6	7	0	9	10	11	12	13	0	0	0	0	0	0	0	21	0	0	24	25	26
3393	0	53	4	4	0	0	0	0	0	0	0	0	0	0	0	0	0	0	1	0	2	dopo il 14 marzo		1	2	3	4	5	6	0	0	9	10	11	12	13	14	0	16	0	0	0	0	21	22	0	24	25	26
3653	1	60	4	4	0	0	0	0	0	0	0	0	0	0	0	0	0	0	1	0	2	21-23 febbraio		1	2	0	4	5	6	0	0	9	10	0	12	13	0	15	0	0	0	0	0	21	22	23	0	25	26
2313	1	26	4	4	0	0	0	0	0	0	0	0	0	0	0	0	0	0	1	0	2	7-14 marzo		1	2	3	4	5	0	0	0	9	10	0	12	13	14	0	16	0	0	0	0	21	0	0	24	25	26
3312	0	66	4	4	0	0	0	0	0	0	0	0	0	0	0	0	0	0	1	0	2	2-6 marzo		1	2	3	4	5	6	0	0	9	0	0	12	13	14	0	16	0	0	0	0	21	0	0	24	25	26
3632	0	53	4	4	0	0	0	0	0	0	0	0	0	0	0	0	0	0	1	0	2	7-14 marzo		1	2	3	4	5	6	0	0	9	10	11	12	13	14	0	0	0	0	19	0	21	0	0	24	25	26
1844	0	55	4	4	0	0	0	0	0	0	0	0	0	0	0	0	0	0	1	0	2	7-14 marzo		1	2	3	4	5	6	7	8	9	10	11	12	13	14	0	16	0	0	0	0	21	0	0	24	25	26
2569	1	33	4	4	0	0	0	0	0	0	0	0	0	0	0	0	0	0	1	0	2	7-14 marzo		1	2	3	4	5	6	0	0	9	10	0	12	13	14	15	0	0	18	0	0	21	22	0	0	25	26
1239	1	34	4	4	0	0	0	0	0	0	0	0	0	0	0	0	0	0	1	0	2	24 febbraio - 1 marzo		1	2	3	4	5	6	0	0	9	10	11	12	13	14	0	0	0	18	0	0	21	0	0	24	25	26
3595	0	37	4	4	0	0	0	0	0	0	0	0	0	0	0	0	0	0	1	0	2	7-14 marzo		0	0	0	0	0	0	0	0	0	0	0	12	13	14	0	16	0	0	0	0	21	22	23	0	25	26
1428	0	38	4	4	0	0	0	0	0	0	0	0	0	0	0	0	0	0	1	0	2	7-14 marzo		1	2	3	4	5	6	0	0	9	10	0	12	13	14	0	0	0	18	0	0	21	22	0	0	25	26
1619	0	39	4	4	0	0	0	0	0	0	0	0	0	0	0	0	0	0	1	0	2	21-23 febbraio		1	2	3	0	0	6	0	0	9	10	0	12	13	14	15	0	0	0	0	0	21	0	23	24	25	26
2424	0	40	4	4	0	0	0	0	0	0	0	0	0	0	0	0	0	0	1	0	2	7-14 marzo		1	2	3	0	0	0	0	0	9	10	0	12	13	0	0	16	0	0	0	0	21	22	0	0	25	0
3071	0	42	4	4	0	0	0	0	0	0	0	0	0	0	0	0	0	0	1	0	2	7-14 marzo		1	2	3	4	5	6	7	8	9	10	11	12	13	14	15	0	17	0	0	0	21	22	0	0	25	26
313	0	53	4	4	0	0	0	0	0	0	0	0	0	0	0	0	0	0	1	0	2	7-14 marzo		1	2	3	4	5	6	0	0	9	0	11	12	13	14	0	16	0	0	0	0	21	0	0	24	0	26
3494	0	54	4	4	0	0	0	0	0	0	0	0	0	0	0	0	0	0	1	0	2	2-6 marzo		1	2	3	4	5	6	0	0	9	10	11	12	0	0	0	16	0	0	0	0	21	0	0	24	25	26
3756	0	55	4	4	0	0	0	0	0	0	0	0	0	0	0	0	0	0	1	0	2	21-23 febbraio		1	2	3	4	5	6	7	8	9	10	11	12	13	14	15	16	0	0	0	0	21	0	0	24	25	26
1637	0	56	4	4	0	0	0	0	0	0	0	0	0	0	0	0	0	0	1	0	2	7-14 marzo		1	2	3	4	0	6	0	0	9	10	0	12	13	14	15	0	0	0	0	0	21	22	0	24	25	26
1734	0	57	4	4	0	0	0	0	0	0	0	0	0	0	0	0	0	0	1	0	2	24 febbraio - 1 marzo		1	2	3	4	5	6	0	0	9	10	0	12	13	14	0	0	0	0	0	0	21	22	0	0	25	26
3489	0	58	4	4	0	0	0	0	0	0	0	0	0	0	0	0	0	0	1	0	2	7-14 marzo		0	0	0	0	0	0	0	0	9	0	0	12	13	0	0	0	0	0	0	0	21	22	0	0	0	0
953	0	58	4	4	0	0	0	0	0	0	0	0	0	0	0	0	0	0	1	0	2	2-6 marzo		0	0	0	0	0	0	0	0	0	0	0	0	0	0	0	0	0	0	0	0	0	0	0	0	0	0
2885	0	60	4	4	0	0	0	0	0	0	0	0	0	0	0	0	0	0	1	0	2	7-14 marzo		1	2	3	4	5	6	7	8	9	10	0	12	13	14	0	16	0	0	0	0	21	0	23	0	25	26
2717	0	61	4	4	0	0	0	0	0	0	0	0	0	0	0	0	0	0	1	0	2	7-14 marzo		1	2	3	4	5	6	0	0	9	10	0	12	13	14	15	16	0	0	19	0	21	22	0	0	25	26
2029	0	63	4	4	0	0	0	0	0	0	0	0	0	0	0	0	0	0	1	0	2	2-6 marzo		1	2	3	4	5	6	7	8	9	10	11	12	13	14	0	0	17	0	0	0	21	0	0	24	25	26
2189	0	66	4	4	0	0	0	0	0	0	0	0	0	0	0	0	0	0	1	0	2	24 febbraio - 1 marzo		1	0	0	0	0	6	7	8	9	10	0	12	13	14	15	0	0	0	0	0	21	22	0	0	25	26
1715	1	58	4	7	0	0	0	0	0	0	0	0	0	0	0	0	0	0	1	0	2	7-14 marzo		1	2	3	4	5	6	0	0	9	10	0	12	13	14	0	16	0	0	0	0	21	0	23	24	25	26
1582	0	59	7	7	0	0	0	0	0	0	0	0	0	0	0	0	0	0	1	0	2	7-14 marzo		1	2	3	4	5	6	7	0	9	10	11	12	13	14	0	0	17	0	0	0	21	0	0	24	25	26
68	0	52	7	7	0	0	0	0	0	0	0	0	0	0	0	0	0	0	1	0	2	7-14 marzo		0	0	0	0	0	0	0	0	0	0	0	0	0	0	0	0	0	0	0	0	0	0	0	0	0	0
3276	0	61	7	7	0	0	0	0	0	0	0	0	0	0	0	0	0	0	1	0	2	2-6 marzo		1	2	3	4	5	6	0	0	9	10	0	12	13	14	15	0	17	0	0	0	21	22	0	0	25	26
3485	0	66	7	7	0	0	0	0	0	0	0	0	0	0	0	0	0	0	1	0	2	2-6 marzo		1	2	0	0	5	6	0	8	0	10	0	12	13	14	0	16	0	0	0	0	21	0	23	0	25	26
2974	0	45	7	10	0	0	0	0	0	0	0	0	0	0	0	0	0	0	1	0	2	2-6 marzo		1	2	3	4	5	6	7	8	9	10	11	12	13	14	15	16	0	0	0	0	21	22	0	24	25	26
1114	0	60	7	10	0	0	0	0	0	0	0	0	0	0	0	0	0	0	1	0	2	2-6 marzo		1	2	0	0	5	0	0	0	9	10	0	12	13	14	0	16	0	0	0	0	21	0	0	24	25	26
2550	0	60	7	7	0	0	0	0	0	0	0	0	0	0	0	0	0	0	1	0	2	7-14 marzo		1	2	3	4	5	6	0	0	0	0	0	12	13	14	0	0	17	0	0	0	21	0	23	0	25	26
2312	0	41	7	7	0	0	0	0	0	0	0	0	0	0	0	0	0	0	1	0	2	2-6 marzo		1	2	3	4	5	6	0	0	9	0	0	12	13	14	0	16	0	0	0	0	21	22	0	0	25	26
3641	0	66	7	7	0	0	0	0	0	0	0	0	0	0	0	0	0	0	1	0	2	7-14 marzo		1	2	0	0	0	6	0	0	0	0	0	12	13	14	15	16	0	0	0	0	21	22	0	0	25	26
2461	1	65	7	8	0	0	0	0	0	0	0	0	0	0	0	0	0	0	1	0	2	7-14 marzo		1	2	3	4	5	6	7	8	9	10	11	12	13	14	15	16	0	0	0	0	21	22	0	0	25	26
543	1	48	7	7	0	0	0	0	0	0	0	0	0	0	0	0	0	0	2	0	2	24 febbraio - 1 marzo		1	2	3	4	5	6	0	0	9	10	0	12	13	14	0	0	0	0	0	0	21	22	0	0	25	26
3579	0	29	7	3	0	0	0	0	0	0	0	0	0	0	0	0	0	0	1	0	2	7-14 marzo		1	2	3	4	5	6	0	0	9	10	0	12	13	14	0	0	0	0	0	0	0	0	0	24	25	26
3792	0	29	7	8	0	0	0	0	0	0	0	0	0	0	0	0	0	0	1	0	2	2-6 marzo		1	2	0	4	5	6	7	0	9	10	11	12	13	14	0	16	0	0	0	0	0	0	0	24	25	26
1432	0	46	7	3	0	0	0	0	0	0	0	0	0	0	0	0	0	0	1	0	2	7-14 marzo		1	2	0	4	5	6	0	0	0	0	0	12	0	0	0	16	0	0	0	0	21	0	0	24	25	26
1892	0	54	7	7	0	0	0	0	0	0	0	0	0	0	0	0	0	0	1	0	2	7-14 marzo		1	2	3	4	5	6	0	0	9	10	11	12	13	14	0	0	17	0	0	0	21	0	0	24	25	26
2809	0	66	7	1	0	0	0	0	0	0	0	0	0	0	0	0	0	0	1	0	2	7-14 marzo		1	2	0	0	5	6	0	0	9	10	0	12	0	14	0	16	0	0	0	0	0	0	23	0	25	26
204	0	56	7	7	0	0	0	0	0	0	0	0	0	0	0	0	0	0	1	0	2	dopo il 14 marzo		1	0	0	4	5	6	7	8	9	10	11	12	13	14	15	16	0	0	0	0	21	0	0	24	25	26
3730	0	49	7	7	0	0	0	0	0	0	0	0	0	0	0	0	0	0	1	0	2	7-14 marzo		1	2	3	4	5	6	7	8	9	10	11	12	13	14	0	16	0	0	0	0	21	0	0	24	25	26
2959	0	36	7	7	0	0	0	0	0	0	0	0	0	0	0	0	0	0	1	0	2	2-6 marzo		1	0	0	4	5	6	0	0	9	10	0	12	13	14	0	16	0	0	0	0	0	0	0	24	25	0
2183	1	46	7	7	0	0	0	0	0	0	0	0	0	0	0	0	0	0	1	0	2	2-6 marzo	24 febbraio - 1 marzo	1	2	3	4	5	6	0	0	9	10	0	12	13	14	0	16	0	0	19	0	21	0	0	24	25	26
2801	0	48	7	7	0	0	0	0	0	0	0	0	0	0	0	0	0	0	1	0	2	7-14 marzo		1	2	3	4	5	6	0	0	9	10	0	12	13	0	0	0	0	0	0	0	21	0	0	24	25	26
3345	0	63	7	7	0	0	0	0	0	0	0	0	0	0	0	0	0	0	1	0	2	7-14 marzo		1	2	3	4	5	6	0	0	9	0	0	12	13	14	0	0	17	0	0	0	0	0	0	24	25	26
1137	0	60	7	7	0	0	0	0	0	0	0	0	0	0	0	0	0	0	1	0	2	24 febbraio - 1 marzo		1	2	3	4	5	6	0	8	9	0	0	12	13	14	15	16	0	0	0	0	21	22	0	24	25	26
2405	1	27	7	8	0	0	0	0	0	0	0	0	0	0	0	0	0	0	1	0	2	21-23 febbraio		1	2	3	4	5	6	0	0	9	10	11	12	13	14	0	0	17	0	0	0	21	22	0	0	25	0
972	0	39	7	8	0	0	0	0	0	0	0	0	0	0	0	0	0	0	1	0	2	7-14 marzo		1	2	0	0	0	6	0	0	9	0	0	12	13	0	0	0	0	0	19	0	21	0	0	24	25	26
3789	0	32	7	3	0	0	0	0	0	0	0	0	0	0	0	0	0	0	1	0	2	7-14 marzo		1	2	3	4	5	6	7	0	9	10	11	12	13	14	0	0	17	0	0	0	21	0	23	24	25	26
195	0	37	7	3	0	0	0	0	0	0	0	0	0	0	0	0	0	0	1	0	2	7-14 marzo		1	2	3	4	5	6	0	8	9	10	0	12	0	0	0	16	0	0	0	0	21	0	0	24	25	26
3673	0	56	7	7	0	0	0	0	0	0	0	0	0	0	0	0	0	0	1	0	2	dopo il 14 marzo		1	2	3	4	5	6	7	8	9	10	0	12	13	14	15	0	17	0	19	0	21	22	23	0	25	26
2369	0	63	7	7	0	0	0	0	0	0	0	0	0	0	0	0	0	0	1	0	2	2-6 marzo		0	2	3	4	5	6	0	0	0	10	0	12	0	14	0	0	0	0	0	0	0	0	0	24	25	26
1496	0	50	7	8	0	0	0	0	0	0	0	0	0	0	0	0	0	0	1	0	2	2-6 marzo		1	2	0	4	5	0	0	0	9	0	0	12	13	14	0	0	17	0	0	0	21	22	0	24	25	26
3593	1	28	7	7	1	2	0	0	5	6	7	8	9	10	0	0	0	0	1	0	2	24 febbraio - 1 marzo		1	2	3	4	5	6	0	0	9	10	0	12	13	14	0	16	0	0	0	0	21	22	0	24	25	26
723	1	58	7	7	0	0	0	0	0	0	0	0	0	0	0	0	0	0	1	0	2	2-6 marzo		1	2	0	0	5	6	0	0	9	10	11	0	13	14	0	16	0	0	0	0	21	22	0	24	25	26
2614	1	28	7	7	0	0	0	0	0	0	0	0	0	0	0	0	0	0	1	0	2	24 febbraio - 1 marzo		1	2	3	4	5	6	0	0	9	10	0	12	13	14	0	0	0	0	0	0	21	0	0	24	25	26
2990	1	28	7	7	0	0	0	0	0	0	0	0	0	0	0	0	0	0	1	0	2	7-14 marzo		1	2	3	4	5	6	7	0	9	10	0	12	13	0	15	0	0	0	0	0	21	22	0	0	25	26
1335	1	34	7	7	0	0	0	0	0	0	0	0	0	0	0	0	0	0	1	0	2	2-6 marzo		1	2	3	4	5	6	0	0	9	10	0	12	13	14	0	0	0	18	0	0	21	22	0	0	0	26
2712	1	40	7	7	0	0	0	0	0	0	0	0	0	0	0	0	0	0	1	0	2	2-6 marzo		1	2	0	0	5	6	0	8	9	10	0	12	13	0	15	0	0	0	0	0	0	0	0	24	25	26
496	0	44	7	7	0	0	0	0	0	0	0	0	0	0	0	0	0	0	1	0	2	7-14 marzo		1	0	0	0	0	6	7	0	9	0	11	12	13	0	0	0	0	18	0	0	21	0	23	0	25	26
2148	0	57	7	7	0	0	0	0	0	0	0	0	0	0	0	0	0	0	1	0	2	2-6 marzo		1	2	3	4	5	6	0	0	9	10	0	12	13	14	0	16	0	0	0	0	21	0	0	24	25	26
2767	0	62	7	7	0	0	0	0	0	0	0	0	0	0	0	0	0	0	1	0	2	7-14 marzo		1	2	3	4	5	6	7	0	9	10	0	12	13	0	0	0	0	0	19	0	21	0	0	24	25	0
1599	1	58	7	10	0	0	0	0	0	0	0	0	0	0	0	0	0	0	1	0	2	7-14 marzo		0	2	0	4	5	6	0	0	9	10	0	12	13	14	15	16	0	0	0	0	21	0	0	24	25	26
3813	0	67	7	7	0	0	0	0	0	0	0	0	0	0	0	0	0	0	1	0	2	24 febbraio - 1 marzo		0	0	3	4	5	0	0	0	9	10	11	0	0	0	15	16	0	0	0	20	0	0	23	0	25	26
3582	0	29	7	7	0	0	0	0	0	0	0	0	0	0	0	0	0	0	1	0	2	7-14 marzo		1	2	0	4	5	6	0	8	0	10	0	12	13	14	0	0	17	0	0	0	21	22	0	0	25	26
328	0	56	7	7	0	0	0	0	0	0	0	0	0	0	0	0	0	0	1	0	2	2-6 marzo		1	2	3	4	5	6	7	0	9	10	0	12	13	14	0	16	0	0	0	0	21	0	0	24	25	26
3498	0	58	7	7	0	0	0	0	0	0	0	0	0	0	0	0	0	0	1	0	2	24 febbraio - 1 marzo		1	0	3	4	5	6	0	0	9	0	0	12	13	14	15	0	0	0	0	0	0	0	0	0	25	26
2332	0	63	7	1	0	0	0	0	0	0	0	0	0	0	0	0	0	0	1	0	2	2-6 marzo		1	2	3	4	5	6	0	0	9	10	11	12	13	14	15	0	0	0	0	20	21	22	23	24	25	26
1405	0	38	7	4	0	0	0	0	0	0	0	0	0	0	0	0	0	0	1	0	2	7-14 marzo		0	0	0	0	0	0	0	0	0	0	0	0	0	0	0	0	0	0	0	0	0	0	0	0	0	0
1136	0	31	7	7	0	0	0	0	0	0	0	0	0	0	0	0	0	0	1	0	2	2-6 marzo		1	2	3	4	5	0	0	0	9	10	0	12	13	0	0	16	0	0	0	0	0	22	0	0	25	0
2119	1	34	7	7	0	0	0	0	0	0	0	0	0	0	0	0	0	0	1	0	2	7-14 marzo		1	2	3	0	0	6	0	0	9	10	0	12	13	14	0	0	0	0	0	0	0	22	0	0	25	26
3630	0	57	7	7	0	0	0	0	0	0	0	0	0	0	0	0	0	0	1	0	2	21-23 febbraio		1	2	3	4	5	6	0	0	9	10	11	12	13	14	0	0	0	0	19	0	21	22	0	0	25	26
3059	0	32	7	7	0	0	0	0	0	0	0	0	0	0	0	0	0	0	1	0	2	2-6 marzo		0	2	0	4	5	6	0	0	9	10	11	12	13	14	0	0	0	18	0	0	21	22	0	0	25	26
3832	0	41	7	7	0	0	0	0	0	0	0	0	0	0	0	0	0	0	1	0	2	7-14 marzo		1	0	3	4	5	6	0	0	9	10	11	12	13	14	0	16	0	0	0	0	21	0	0	24	25	26
3488	0	65	7	7	0	0	0	0	0	0	0	0	0	0	0	0	0	0	1	0	2	7-14 marzo		0	2	3	4	5	6	0	0	9	0	0	12	13	0	15	0	0	0	0	0	0	22	0	0	25	26
3405	0	51	7	7	0	0	0	0	0	0	0	0	0	0	0	0	0	0	1	0	2	7-14 marzo		1	2	0	4	5	0	0	0	0	10	0	12	13	14	0	0	0	0	0	0	21	0	0	24	25	26
356	0	61	7	1	0	0	0	0	0	0	0	0	0	0	0	0	0	0	1	0	2	7-14 marzo		1	2	3	4	5	6	7	8	9	10	11	12	13	14	0	16	0	0	0	0	21	22	0	0	25	26
4	0	27	7	7	0	0	0	0	0	0	0	0	0	0	0	0	0	0	1	0	2	7-14 marzo		1	2	0	0	0	6	0	0	0	10	0	12	13	0	0	0	0	0	0	0	21	22	23	0	25	26
3453	0	71	7	7	0	0	0	0	0	0	0	0	0	0	0	0	0	0	1	0	2	7-14 marzo		1	2	3	0	0	6	0	0	0	10	11	12	13	14	15	0	0	0	0	0	21	22	23	0	25	26
2438	1	64	7	7	0	0	0	0	0	0	0	0	0	0	0	0	0	0	1	0	2	7-14 marzo		1	2	3	4	5	6	7	0	9	10	11	12	13	14	0	0	0	0	0	0	21	0	0	24	25	26
3134	0	61	7	7	0	0	0	0	0	0	0	0	0	0	0	0	0	0	1	0	2	2-6 marzo		0	2	0	4	5	0	0	8	0	0	11	12	13	14	0	0	0	0	0	0	21	0	23	24	25	26
3618	1	29	7	7	0	0	0	0	0	0	0	0	0	0	0	0	0	0	1	0	2	7-14 marzo		1	2	0	0	0	6	0	0	9	10	0	12	0	0	15	0	0	0	0	0	21	0	0	24	25	0
1015	0	48	7	7	0	0	0	0	0	0	0	0	0	0	0	0	0	0	1	0	2	2-6 marzo		1	2	0	4	5	0	0	0	9	10	11	12	13	0	0	16	0	0	0	0	21	0	0	24	25	0
3252	0	49	7	7	0	0	0	0	0	0	0	0	0	0	0	0	0	0	1	0	2	7-14 marzo		1	2	3	4	5	6	7	0	9	10	0	12	13	14	15	0	17	0	0	0	21	22	23	0	25	26
3131	0	49	7	7	0	0	0	0	0	0	0	0	0	0	0	0	0	0	1	0	2	24 febbraio - 1 marzo		1	2	3	4	5	6	0	0	9	10	0	12	13	14	15	0	0	0	0	0	21	0	0	24	25	26
3452	0	53	7	7	0	0	0	0	0	0	0	0	0	0	0	0	0	0	1	0	2	7-14 marzo		1	2	3	4	5	6	0	0	9	10	0	12	13	14	15	16	0	0	0	0	21	0	0	24	25	26
2683	0	56	7	7	0	0	0	0	0	0	0	0	0	0	0	0	0	0	1	0	2	7-14 marzo		1	2	3	0	5	6	0	0	0	0	0	12	13	14	0	16	0	0	0	0	21	0	0	24	25	0
1162	0	62	7	7	0	0	0	0	0	0	0	0	0	0	0	0	0	0	1	0	2	7-14 marzo		1	2	3	4	5	6	0	0	9	10	0	12	13	14	0	16	0	0	0	0	21	0	0	24	25	26
3352	0	64	7	7	0	0	0	0	0	0	0	0	0	0	0	0	0	0	1	0	2	7-14 marzo		1	2	3	4	5	6	7	0	9	0	11	12	13	14	0	0	0	18	0	0	21	0	23	0	25	26
882	0	65	7	7	0	0	0	0	0	0	0	0	0	0	0	0	0	0	1	0	2	dopo il 14 marzo		0	2	3	4	5	6	0	0	9	0	0	12	0	14	0	16	0	0	0	0	21	0	0	24	25	26
3090	0	67	7	7	0	0	0	0	0	0	0	0	0	0	0	0	0	0	1	0	2	2-6 marzo		1	0	0	4	5	6	0	8	9	10	0	0	13	14	0	16	0	0	0	0	21	0	23	0	25	0
283	0	71	7	7	0	0	0	0	0	0	0	0	0	0	0	0	0	0	1	0	2	7-14 marzo		1	2	0	4	5	0	7	8	9	10	0	12	13	14	0	16	0	0	0	0	21	22	0	24	25	26
161	0	35	7	8	0	0	0	0	0	0	0	0	0	0	0	0	0	0	1	0	2	dopo il 14 marzo		1	0	0	4	5	6	0	0	9	0	0	12	13	14	0	16	0	18	0	0	0	0	0	0	25	26
866	0	59	7	8	0	0	0	0	0	0	0	0	0	0	0	0	0	0	1	0	2	7-14 marzo		1	2	3	4	5	0	0	0	9	10	0	12	13	14	0	0	0	0	0	0	21	22	0	0	25	26
340	0	56	10	10	0	0	0	0	0	0	0	0	0	0	0	0	0	0	1	0	2	2-6 marzo		1	2	3	4	5	6	7	0	9	10	11	12	0	0	15	16	0	0	0	0	21	22	23	24	25	26
409	1	31	10	10	0	0	0	0	0	0	0	0	0	0	0	0	0	0	1	0	2	24 febbraio - 1 marzo		1	2	3	4	5	6	0	0	9	10	0	12	13	0	0	0	0	0	0	0	21	0	0	24	25	26
2770	0	37	10	10	0	0	0	0	0	0	0	0	0	0	0	0	0	0	1	0	2	7-14 marzo		0	2	0	4	0	0	0	0	9	10	11	12	13	0	0	16	0	0	0	0	21	0	0	24	25	26
1240	1	26	10		0	0	0	0	0	0	0	0	0	0	0	0	0	0	1	0	2	2-6 marzo		1	2	3	4	5	6	7	8	9	10	11	12	13	14	15	0	0	0	0	0	21	22	0	0	25	26
1088	1	29	10	9	0	0	0	0	0	0	0	0	0	0	0	0	0	0	1	0	2	24 febbraio - 1 marzo		1	2	3	4	5	6	0	0	9	10	0	12	13	14	0	0	0	0	0	0	21	22	0	24	25	26
2011	0	51	10	10	0	0	0	0	0	0	0	0	0	0	0	0	0	0	1	0	2	7-14 marzo		1	2	3	4	5	6	0	0	9	10	11	12	13	14	0	0	17	0	0	0	21	0	0	24	25	26
2398	0	57	10	10	0	0	0	0	0	0	0	0	0	0	0	0	0	0	1	0	2	7-14 marzo		1	2	0	4	5	6	7	0	9	10	0	12	13	14	15	16	17	18	19	0	0	0	23	24	25	26
476	1	29	10	10	0	0	0	0	0	0	0	0	0	0	0	0	0	0	1	0	2	dopo il 14 marzo		1	2	0	4	5	6	0	0	9	0	0	12	13	14	0	0	0	0	0	0	21	0	0	24	25	0
1320	0	66	10	10	0	0	0	0	0	0	0	0	0	0	0	0	0	0	1	0	2	24 febbraio - 1 marzo		1	2	3	4	5	6	0	0	9	0	0	12	13	14	15	0	0	0	0	0	21	22	0	24	25	26
503	0	56	10	10	0	0	0	0	0	0	0	0	0	0	0	0	0	0	1	0	2	2-6 marzo		0	2	0	4	5	6	0	0	0	10	0	12	0	14	0	0	0	0	0	0	0	0	23	0	25	0
494	1	45	10	10	0	0	0	0	0	0	0	0	0	0	0	0	0	0	1	0	2	7-14 marzo		0	0	0	0	0	0	0	0	0	0	0	0	0	0	0	0	0	0	0	0	0	0	0	0	0	0
447	0	50	10	5	0	0	0	0	0	0	0	0	0	0	0	0	0	0	1	0	2	7-14 marzo		1	2	3	4	5	0	0	0	0	0	0	0	0	0	0	0	0	0	0	0	0	0	0	0	0	0
974	0	41	10	10	0	0	0	0	0	0	0	0	0	0	0	0	0	0	1	0	2	2-6 marzo		1	2	3	4	5	6	0	0	9	10	11	12	13	14	0	16	0	0	0	0	21	0	0	0	0	0
1895	0	47	10	10	0	0	0	0	0	0	0	0	0	0	0	0	0	0	1	0	2	7-14 marzo		1	2	0	4	5	0	0	0	9	0	0	0	13	14	15	0	0	0	0	0	0	0	0	24	25	0
1164	0	66	10	10	0	0	0	0	0	0	0	0	0	0	0	0	0	0	1	0	2	7-14 marzo		1	2	0	4	5	6	0	0	9	0	0	12	13	14	0	16	0	0	0	0	21	0	0	24	25	26
3532	1	35	10	10	0	0	0	0	0	0	0	0	0	0	0	0	0	0	1	0	2	24 febbraio - 1 marzo		1	2	3	4	5	6	7	8	9	10	0	12	13	14	15	16	0	0	0	0	21	22	0	0	25	26
1755	1	39	10	10	0	0	0	0	0	0	0	0	0	0	0	0	0	0	1	0	2	2-6 marzo		1	2	3	4	5	6	7	8	9	10	11	12	13	14	15	0	0	0	0	0	21	22	0	0	25	26
1880	0	55	10	10	0	0	0	0	0	0	0	0	0	0	0	0	0	0	1	0	2	7-14 marzo		0	2	3	4	5	6	0	0	0	0	0	12	13	0	0	0	0	0	0	0	0	0	0	24	25	0
2549	0	61	10	10	0	0	0	0	0	0	0	0	0	0	0	0	0	0	1	0	2	21-23 febbraio		1	2	3	4	5	6	0	0	9	10	0	12	13	14	15	0	0	0	0	0	21	22	23	0	25	26
2860	0	37	3	3	0	0	0	0	0	0	0	0	0	0	0	0	0	0	1	0	2	2-6 marzo		1	2	3	4	5	6	0	0	0	10	11	12	13	14	0	16	0	0	0	0	0	22	0	0	25	26
3413	1	26	3	1	0	0	0	0	0	0	0	0	0	0	0	0	0	0	1	0	2	7-14 marzo		1	2	0	4	5	6	0	0	9	10	0	12	13	0	0	16	0	0	0	0	21	22	0	0	25	26
492	1	36	3	3	0	0	0	0	0	0	0	0	0	0	0	0	0	0	1	0	2	2-6 marzo		1	2	3	4	5	6	0	0	9	10	11	12	13	14	0	0	0	0	19	0	21	22	0	0	25	26
3322	0	44	3	3	0	0	0	0	0	0	0	0	0	0	0	0	0	0	1	0	2	7-14 marzo		1	0	0	4	5	0	0	0	9	0	0	12	13	14	15	0	0	0	0	0	21	22	0	24	25	26
2327	0	42	3	8	0	0	0	0	0	0	0	0	0	0	0	0	0	0	1	0	2	7-14 marzo		1	2	0	4	5	6	0	0	9	10	11	0	13	14	0	0	17	0	0	0	21	0	23	0	25	26
1290	0	47	3	8	0	0	0	0	0	0	0	0	0	0	0	0	0	0	1	0	2	7-14 marzo		1	2	3	4	5	6	0	0	9	0	0	12	13	14	15	16	0	0	0	0	21	0	0	24	25	26
597	0	46	3	3	0	0	0	0	0	0	0	0	0	0	0	0	0	0	1	0	2	dopo il 14 marzo		1	2	3	4	5	0	0	0	9	0	0	12	13	14	15	16	0	0	0	0	21	0	23	24	25	26
3549	1	40	3	3	0	0	0	0	0	0	0	0	0	0	0	0	0	0	1	0	2	7-14 marzo		1	2	0	0	0	6	0	0	9	0	0	0	13	14	0	16	0	0	0	0	21	0	0	24	25	26
1594	0	54	3	3	0	0	0	0	0	0	0	0	0	0	0	0	0	0	1	0	2	7-14 marzo		1	2	3	4	5	6	7	8	9	10	11	12	13	14	15	0	0	0	0	0	21	0	0	24	25	0
606	0	64	3	3	1	2	3	0	0	0	0	0	0	0	0	0	0	0	1	0	2	7-14 marzo		1	2	0	4	5	6	0	0	9	10	0	12	13	14	0	16	0	18	0	0	21	22	23	0	25	26
2223	0	54	3	3	0	0	0	0	0	0	0	0	0	0	0	0	0	0	1	0	2	7-14 marzo		1	2	0	4	5	6	7	8	9	10	0	12	13	14	0	16	0	18	0	0	21	22	0	0	25	26
1255	0	39	3	3	0	0	0	0	0	0	0	0	0	0	0	0	0	0	1	0	2	7-14 marzo		1	2	0	4	0	6	0	0	9	0	0	0	13	0	0	0	0	0	0	20	21	22	0	0	25	26
3514	1	30	3	13	1	0	0	4	0	6	7	8	9	0	0	0	0	0	1	0	2	dopo il 14 marzo		0	2	0	0	0	6	0	0	9	10	0	12	13	0	0	0	0	0	0	0	0	0	0	24	25	0
1361	1	61	3	3	0	0	0	0	0	0	0	0	0	0	0	0	0	0	1	0	2	2-6 marzo		1	2	3	4	5	6	0	0	9	10	11	12	13	14	0	16	0	0	0	0	21	22	0	24	25	26
2654	1	35	3	3	0	0	0	0	0	0	0	0	0	0	0	0	0	0	1	0	2	7-14 marzo		1	2	3	4	5	6	0	0	9	10	0	12	13	14	0	16	0	0	0	0	21	0	0	24	25	26
1331	1	44	3	3	0	0	0	0	0	0	0	0	0	0	0	0	0	0	1	0	2	7-14 marzo		1	2	0	4	5	6	0	0	9	10	0	12	13	14	0	16	0	0	0	0	21	0	0	24	25	26
211	0	43	3	3	0	0	0	0	0	0	0	0	0	0	0	0	0	0	1	0	2	7-14 marzo		1	2	0	0	5	6	7	8	9	0	0	12	13	14	0	0	0	0	0	0	0	22	0	0	25	26
2330	1	26	3	3	0	0	0	0	0	0	0	0	0	0	0	0	0	0	1	0	2	7-14 marzo		1	2	0	0	0	6	7	0	9	0	0	12	0	0	0	16	0	0	0	0	21	22	0	0	25	0
2561	0	37	3	3	0	0	0	0	0	0	0	0	0	0	0	0	0	0	1	0	2	7-14 marzo		1	0	0	4	5	6	0	0	0	10	11	12	13	14	15	0	0	0	0	0	21	0	0	24	25	26
3199	1	43	3	3	0	0	0	0	0	0	0	0	0	0	0	0	0	0	1	0	2	dopo il 14 marzo		1	2	3	4	5	6	0	0	0	10	11	12	13	0	0	16	0	0	0	0	21	0	0	24	25	26
2130	0	65	3	3	0	0	0	0	0	0	0	0	0	0	0	0	0	0	1	0	2	7-14 marzo		1	2	3	4	5	6	7	8	9	10	11	12	13	14	15	16	0	0	19	0	21	22	0	24	25	26
3554	0	68	3	3	0	0	0	0	0	0	0	0	0	0	0	0	0	0	1	0	2	24 febbraio - 1 marzo		1	2	0	4	5	6	0	0	9	10	0	12	13	14	15	16	0	0	0	0	21	0	0	24	25	0
2275	0	61	3	3	0	0	0	0	0	0	0	0	0	0	0	0	0	0	1	0	2	7-14 marzo		1	0	3	4	5	6	0	0	0	10	0	12	13	0	0	16	0	0	0	0	0	0	0	24	25	0
2558	0	71	3	3	0	0	0	0	0	0	0	0	0	0	0	0	0	0	1	0	2	2-6 marzo		1	2	3	4	0	6	0	0	9	0	0	12	13	14	0	0	0	0	0	0	21	0	0	24	25	26
3330	0	62	3	8	0	0	0	0	0	0	0	0	0	0	0	0	0	0	1	0	2	24 febbraio - 1 marzo		1	2	0	4	5	6	0	0	0	10	0	12	13	14	0	16	0	0	0	0	21	0	0	24	25	26
2342	0	58	3	3	0	0	0	0	0	0	0	0	0	0	0	0	0	0	1	0	2	7-14 marzo		1	2	3	4	5	6	0	0	9	10	11	12	13	14	0	16	0	0	0	0	21	0	0	24	25	26
3545	1	49	3	3	0	0	0	0	0	0	0	0	0	0	0	0	0	0	1	0	2	7-14 marzo		1	2	0	4	5	6	0	0	9	10	0	12	13	14	15	0	0	0	0	0	21	0	0	24	25	26
2380	0	30	3	3	0	0	0	0	0	0	0	0	0	0	0	0	0	0	1	0	2	dopo il 14 marzo		1	2	0	4	5	6	7	8	9	10	11	12	13	14	15	0	0	0	0	0	21	0	0	24	25	26
841	1	51	3	3	0	0	0	0	0	0	0	0	0	0	0	0	0	0	1	0	2	7-14 marzo		0	2	3	4	5	6	0	0	0	10	11	12	13	0	0	0	0	0	0	0	21	0	0	24	25	26
3768	0	26	3	3	0	0	0	0	0	0	0	0	0	0	0	0	0	0	1	0	2	7-14 marzo		1	2	0	4	0	6	0	0	9	10	0	12	13	14	0	0	0	0	0	0	21	0	0	24	25	26
2665	1	49	3	3	1	2	0	4	0	0	7	0	9	10	0	0	0	0	1	0	2	7-14 marzo		1	0	0	4	5	6	0	0	9	10	0	12	13	0	0	16	0	0	0	0	21	22	0	24	25	26
1403	1	31	3	3	0	0	0	0	0	0	0	0	0	0	0	0	0	0	1	0	2	21-23 febbraio		1	2	3	4	5	6	0	0	0	10	11	12	13	0	0	16	0	0	0	0	21	0	23	0	25	26
2288	1	36	3	3	0	0	0	0	0	0	0	0	0	0	0	0	0	0	1	0	2	7-14 marzo		0	2	0	4	5	6	0	0	9	10	0	12	13	0	0	16	0	0	0	0	21	22	0	0	25	26
1631	0	47	3	3	0	0	0	0	0	0	0	0	0	0	0	0	0	0	1	0	2	24 febbraio - 1 marzo		1	2	0	4	0	6	0	0	9	10	11	0	13	14	0	16	0	0	0	0	0	0	0	24	25	26
2002	0	53	3	3	0	0	0	0	0	0	0	0	0	0	0	0	0	0	1	0	2	2-6 marzo		1	2	3	4	5	6	0	0	9	10	11	12	13	14	0	0	17	18	19	0	21	0	0	24	25	26
3669	0	55	3	3	0	0	0	0	0	0	0	0	0	0	0	0	0	0	1	0	2	2-6 marzo		1	2	3	4	5	6	0	0	9	10	0	12	13	0	0	16	0	0	0	0	21	22	0	24	25	26
3831	1	57	3	3	0	0	0	0	0	0	0	0	0	0	0	0	0	0	1	0	2	2-6 marzo		1	2	0	4	5	0	0	0	9	10	0	12	13	0	15	0	0	0	0	0	21	0	0	24	25	26
3753	0	59	3	3	0	0	0	0	0	0	0	0	0	0	0	0	0	0	1	0	2	7-14 marzo		1	2	3	4	5	6	0	0	9	0	0	12	13	14	0	16	0	0	0	0	21	0	0	24	25	26
2136	0	60	3	3	0	0	0	0	0	0	0	0	0	0	0	0	0	0	1	0	2	2-6 marzo		1	2	3	0	0	6	0	0	9	10	0	12	13	0	15	16	0	0	0	0	21	0	0	24	25	26
2078	0	67	3	3	0	0	0	0	0	0	0	0	0	0	0	0	0	0	1	0	2	21-23 febbraio		1	2	3	0	5	6	7	8	0	10	11	12	13	14	0	16	0	0	0	0	21	0	0	24	25	26
2015	0	71	3	3	0	0	0	0	0	0	0	0	0	0	0	0	0	0	1	0	2	2-6 marzo		1	2	3	4	5	6	0	0	9	10	0	12	13	14	15	0	0	0	0	0	21	22	0	0	25	26
2811	0	66	3	13	0	0	0	0	0	0	0	0	0	0	0	0	0	0	1	0	2	7-14 marzo		0	2	3	4	5	6	0	0	0	10	0	12	13	14	0	0	0	0	0	0	21	22	0	0	25	26
241	0	69	6	6	1	2	0	4	0	0	0	0	0	10	11	0	0	14	1	0	2	dopo il 14 marzo		0	0	0	0	0	0	0	0	0	0	0	0	0	0	0	0	0	0	0	0	0	0	0	0	0	0
572	0	56	6	6	0	0	0	0	0	0	0	0	0	0	0	0	0	0	1	0	2	2-6 marzo		1	2	3	4	5	6	7	8	9	10	11	12	13	14	0	16	0	0	0	0	21	0	23	0	25	0
1592	1	32	6	5	0	0	0	0	0	0	0	0	0	0	0	0	0	0	1	0	2	7-14 marzo		1	2	3	4	5	0	0	0	0	0	11	12	13	14	0	0	0	0	0	0	21	22	23	24	25	26
2238	1	43	6	6	1	0	0	4	0	0	7	0	0	10	0	12	13	0	1	0	2	24 febbraio - 1 marzo		0	2	3	4	5	6	0	0	9	10	0	12	0	0	0	16	0	0	0	0	21	0	0	24	25	26
454	1	56	6	6	0	0	0	0	0	0	0	0	0	0	0	0	0	0	1	0	2	2-6 marzo		1	2	3	4	5	6	0	0	9	10	0	12	13	14	0	16	0	0	0	0	21	0	0	24	25	26
342	0	56	6	6	1	0	0	4	5	6	7	8	0	10	0	0	0	0	1	0	2	2-6 marzo		1	2	3	4	5	6	0	0	9	10	11	12	13	14	15	16	0	0	0	0	21	22	0	24	25	26
2099	0	65	6	6	0	0	0	0	0	0	0	0	0	0	0	0	0	0	1	0	2	2-6 marzo		1	2	3	4	5	6	0	0	9	10	0	12	13	14	0	0	0	0	0	20	21	0	0	24	25	26
238	0	46	6	6	0	0	0	0	0	0	0	0	0	0	0	0	0	0	1	0	2	7-14 marzo		1	2	3	4	5	6	0	0	9	10	0	12	13	0	0	0	0	0	0	0	21	0	0	24	25	26
2039	0	51	6	6	0	0	0	0	0	0	0	0	0	0	0	0	0	0	1	0	2	7-14 marzo		1	2	3	4	5	6	0	0	0	10	11	12	13	14	0	0	0	0	0	0	0	0	0	24	25	26
1065	0	52	6	6	0	0	0	0	0	0	0	0	0	0	0	0	0	0	1	0	2	7-14 marzo		1	2	3	4	5	6	0	0	0	10	0	0	13	0	15	0	0	0	0	0	0	0	23	24	25	26
179	0	43	6	6	1	2	0	4	0	0	0	0	0	0	11	0	0	0	1	0	2	2-6 marzo		1	2	0	4	5	6	0	0	9	10	0	12	13	14	15	0	0	0	0	0	21	0	0	24	25	26
3208	1	41	6	6	0	0	0	0	0	0	0	0	0	0	0	0	0	0	1	0	2	2-6 marzo		1	2	3	4	5	6	0	8	9	10	11	12	13	14	0	16	0	0	0	0	21	22	0	0	25	26
870	0	46	6	6	1	0	0	4	0	0	7	0	0	0	0	12	13	0	1	0	2	7-14 marzo		1	2	3	4	5	6	0	0	9	10	0	12	13	14	0	16	0	0	0	0	21	22	0	24	25	26
3403	0	58	6	6	0	0	0	0	0	0	0	0	0	0	0	0	0	0	1	0	2	2-6 marzo		1	2	3	0	0	6	0	0	9	10	11	12	0	14	0	16	0	0	0	0	21	22	0	0	25	26
94	0	36	6	6	0	0	0	0	0	0	0	0	0	0	0	0	0	0	1	0	2	7-14 marzo		0	0	0	0	0	0	0	0	0	0	0	0	0	0	0	0	0	0	0	0	0	0	0	0	0	0
2025	1	28	6	6	0	0	0	0	0	0	0	0	0	0	0	0	0	0	1	0	2	7-14 marzo		1	2	3	4	5	6	0	8	9	10	11	12	13	0	0	16	0	0	0	0	21	0	0	24	25	0
3244	0	37	6	3	0	0	0	0	0	0	0	0	0	0	0	0	0	0	1	0	2	2-6 marzo		1	2	3	4	5	6	0	0	9	10	0	12	13	14	0	16	0	0	0	0	21	0	0	24	25	26
3697	1	32	6	6	0	0	0	0	0	0	0	0	0	0	0	0	0	0	1	0	2	2-6 marzo		1	2	3	4	0	0	0	0	0	10	0	12	0	0	0	0	0	0	0	0	21	0	23	0	25	26
2718	0	59	6	6	1	2	3	4	5	6	7	8	9	10	0	0	0	0	1	0	2	2-6 marzo		1	2	3	4	5	6	0	0	0	10	0	12	13	14	0	16	0	0	0	0	21	0	23	0	25	0
504	0	46	6	6	1	2	3	4	0	6	7	0	9	10	0	12	13	0	1	0	2	2-6 marzo		1	2	3	0	5	6	7	8	9	10	0	12	13	0	15	0	0	0	0	0	21	0	0	24	25	26
2981	0	66	6	6	0	0	0	0	0	0	0	0	0	0	0	0	0	0	1	0	2	7-14 marzo		1	2	0	4	5	6	0	0	9	10	0	12	13	14	0	16	0	0	0	0	21	0	0	24	0	0
3565	0	46	6	6	0	0	0	0	0	0	0	0	0	0	0	0	0	0	1	0	2	dopo il 14 marzo		1	2	3	4	5	6	0	0	9	10	0	12	13	14	0	0	17	0	0	0	21	22	0	0	25	26
3624	0	59	6	6	1	0	3	0	0	6	0	8	9	10	0	0	0	0	1	0	2	7-14 marzo		1	2	0	4	5	6	0	0	9	10	11	12	13	0	0	0	17	0	0	0	21	22	0	0	25	0
309	1	37	6	8	0	0	0	0	0	0	0	0	0	0	0	0	0	0	1	0	2	2-6 marzo		1	2	3	4	0	0	7	0	9	0	0	12	13	0	15	0	0	0	0	0	0	22	0	0	25	26
3277	1	40	6	1	1	0	3	0	0	0	0	8	9	0	0	0	0	0	1	0	2	24 febbraio - 1 marzo		0	0	0	0	0	0	0	0	0	0	0	0	0	0	0	0	0	0	0	0	0	0	0	0	0	0
364	1	28	6	2	0	0	0	0	0	0	0	0	0	0	0	0	0	0	1	0	2	2-6 marzo		1	2	3	4	5	6	0	0	9	10	11	0	0	0	0	0	0	0	0	20	0	22	0	0	25	26
3542	0	37	6	6	0	0	0	0	0	0	0	0	0	0	0	0	0	0	1	0	2	7-14 marzo		1	2	0	4	5	6	7	8	9	10	0	12	13	14	0	16	0	0	0	0	21	22	0	0	25	26
1787	1	41	6	6	0	0	0	0	0	0	0	0	0	0	0	0	0	0	1	0	2	7-14 marzo		1	2	0	0	0	0	7	0	9	10	11	12	13	0	0	0	0	0	0	0	0	22	0	0	25	0
123	0	65	6	6	0	0	0	0	0	0	0	0	0	0	0	0	0	0	1	0	2	7-14 marzo		0	0	0	0	0	0	0	0	0	0	0	0	0	0	0	0	0	0	0	0	0	0	0	0	0	0
762	0	65	6	6	0	0	0	0	0	0	0	0	0	0	0	0	0	0	1	0	2	2-6 marzo		1	0	0	4	5	6	0	0	0	10	11	12	13	14	0	16	0	0	0	0	21	22	23	0	25	26
2301	1	54	6	1	0	0	0	0	0	0	0	0	0	0	0	0	0	0	1	0	2	7-14 marzo		1	2	3	4	5	6	0	0	9	10	11	12	13	14	0	16	0	0	0	0	21	0	23	24	25	26
2591	1	30	6	2	0	0	0	0	0	0	0	0	0	0	0	0	0	0	1	0	2	7-14 marzo		1	2	3	4	5	6	7	8	9	10	0	12	13	14	0	16	0	0	0	0	21	22	0	0	25	26
1791	1	50	6	6	0	0	0	0	0	0	0	0	0	0	0	0	0	0	1	0	2	2-6 marzo		1	2	3	4	5	6	0	0	9	0	0	12	13	14	0	16	0	0	0	0	21	0	0	24	25	26
2911	0	62	6	6	0	0	0	0	0	0	0	0	0	0	0	0	0	0	1	0	2	7-14 marzo		1	2	0	4	5	0	0	0	0	10	0	12	13	14	0	16	0	0	0	0	21	22	23	0	25	26
2351	1	68	6	6	0	0	0	0	0	0	0	0	0	0	0	0	0	0	1	0	2	2-6 marzo		1	2	0	4	5	0	7	8	9	0	0	0	0	14	0	0	0	0	0	0	21	0	23	0	25	26
1218	0	33	6	6	1	0	0	4	0	0	7	0	0	10	11	0	0	0	1	0	2	7-14 marzo		1	2	3	4	5	6	7	8	9	10	11	12	13	14	0	16	0	0	0	0	21	22	0	0	25	26
2496	0	56	6	6	0	0	0	0	0	0	0	0	0	0	0	0	0	0	1	0	2	7-14 marzo		1	2	0	4	5	6	0	0	9	10	0	12	13	0	0	16	0	0	0	0	21	0	0	24	25	26
1055	0	56	6	6	1	2	0	0	0	6	0	0	0	10	0	12	13	0	1	0	2	2-6 marzo		1	0	3	0	5	6	0	0	9	0	0	12	0	0	0	16	0	0	0	0	0	0	0	24	25	26
2983	0	65	6	6	0	0	0	0	0	0	0	0	0	0	0	0	0	0	1	0	2	7-14 marzo		1	0	0	4	5	6	0	0	9	10	11	12	13	14	0	16	0	0	0	0	21	0	23	0	25	26
2422	0	32	6	3	0	0	0	0	0	0	0	0	0	0	0	0	0	0	1	0	2	7-14 marzo		1	2	3	4	5	6	0	0	9	10	0	12	13	14	0	0	17	0	0	0	0	22	0	0	25	0
2451	0	63	6	6	0	0	0	0	0	0	0	0	0	0	0	0	0	0	1	0	2	2-6 marzo		1	2	3	4	5	6	7	0	9	10	0	12	13	14	0	16	0	0	0	0	21	22	23	0	25	26
3081	1	32	6	5	0	0	0	0	0	0	0	0	0	0	0	0	0	0	1	0	2	7-14 marzo		1	0	0	4	5	6	7	8	9	10	0	12	13	14	0	16	0	0	0	0	0	22	0	0	25	0
1398	0	39	6	6	0	0	0	0	0	0	0	0	0	0	0	0	0	0	1	0	2	7-14 marzo		1	2	3	4	5	6	7	8	9	10	11	12	13	14	15	0	0	18	0	0	21	22	0	0	25	26
3757	0	43	6	6	1	0	3	4	0	0	0	0	0	0	11	0	0	0	1	0	2	7-14 marzo		1	2	3	4	5	6	0	0	9	10	0	12	13	14	0	16	0	0	0	0	21	0	0	24	25	26
3558	1	48	6	6	1	0	3	0	0	6	7	8	0	0	11	12	13	0	1	0	2	dopo il 14 marzo		1	2	3	4	5	6	0	0	9	0	0	0	13	14	0	16	0	0	0	0	0	0	0	24	25	26
1380	1	44	6	1	0	0	0	0	0	0	0	0	0	0	0	0	0	0	1	0	2	7-14 marzo		1	2	3	4	5	0	0	0	9	10	0	12	13	14	15	16	0	0	0	0	21	0	0	24	25	26
1689	1	58	6	6	0	0	0	0	0	0	0	0	0	0	0	0	0	0	1	0	2	dopo il 14 marzo		1	2	3	4	5	6	0	0	9	10	0	12	13	14	0	16	0	0	0	0	21	0	23	0	25	26
321	0	66	6	6	0	0	0	0	0	0	0	0	0	0	0	0	0	0	1	0	2	dopo il 14 marzo		1	2	3	4	5	6	0	0	9	10	0	12	13	14	0	0	0	0	0	20	21	0	0	24	25	26
2476	0	58	6	6	1	0	3	0	0	0	7	0	0	0	0	12	0	0	1	0	2	dopo il 14 marzo		1	0	0	4	0	0	0	0	0	0	0	0	0	0	0	0	0	0	0	0	0	0	0	0	0	0
1701	1	47	6	6	0	0	0	0	0	0	0	0	0	0	0	0	0	0	1	0	2	7-14 marzo		1	2	0	4	5	6	7	0	9	10	0	12	13	14	0	0	0	18	0	0	21	22	0	24	25	26
1059	0	69	6	6	0	0	0	0	0	0	0	0	0	0	0	0	0	0	1	0	2	24 febbraio - 1 marzo		1	2	3	0	5	6	0	0	0	0	0	0	13	14	0	16	0	0	0	0	0	0	0	24	25	0
157	0	39	6	6	0	0	0	0	0	0	0	0	0	0	0	0	0	0	1	0	2	7-14 marzo		1	2	3	4	5	6	7	0	9	10	0	12	13	14	0	0	0	0	0	0	21	22	23	24	25	26
2627	1	41	6	6	1	2	0	4	0	6	7	0	0	0	11	12	13	0	1	0	2	dopo il 14 marzo		1	2	3	4	5	6	0	8	0	10	0	12	13	14	0	16	0	0	0	0	21	22	0	0	25	26
819	0	47	6	6	0	0	0	0	0	0	0	0	0	0	0	0	0	0	1	0	2	7-14 marzo		1	2	3	4	5	6	0	0	9	10	11	12	13	14	15	16	0	0	0	0	21	0	0	24	25	26
219	0	59	6	6	0	0	0	0	0	0	0	0	0	0	0	0	0	0	1	0	2	2-6 marzo		1	2	3	4	5	6	0	0	9	10	0	12	0	14	0	0	0	0	0	0	21	0	0	24	25	26
1419	1	29	6	6	0	0	0	0	0	0	0	0	0	0	0	0	0	0	1	0	2	7-14 marzo		1	2	3	4	5	6	7	8	9	10	11	12	13	14	0	16	0	0	0	0	21	22	0	0	25	26
3256	0	63	6	6	0	0	0	0	0	0	0	0	0	0	0	0	0	0	1	0	2	7-14 marzo		1	2	3	4	5	6	0	0	9	10	0	12	13	14	15	16	0	0	0	0	21	22	0	0	25	26
3507	0	61	6	6	0	0	0	0	0	0	0	0	0	0	0	0	0	0	1	0	2	7-14 marzo		1	2	3	4	5	6	7	8	9	10	11	12	13	14	0	16	0	0	0	0	21	22	0	24	25	26
3423	0	35	6	6	0	0	0	0	0	0	0	0	0	0	0	0	0	0	1	0	2	2-6 marzo		1	0	3	4	0	0	7	0	0	0	11	12	13	0	0	16	0	0	0	0	21	22	0	24	25	0
2672	0	56	6	6	0	0	0	0	0	0	0	0	0	0	0	0	0	0	1	0	2	7-14 marzo		1	2	0	4	5	6	0	0	9	10	0	12	0	14	0	16	0	0	0	0	21	0	0	24	25	26
3300	0	59	6	6	0	0	0	0	0	0	0	0	0	0	0	0	0	0	1	0	2	7-14 marzo		1	2	3	4	5	6	0	0	9	10	0	12	13	14	0	16	17	0	0	0	21	22	23	0	25	26
1928	0	62	6	6	0	0	0	0	0	0	0	0	0	0	0	0	0	0	1	0	2	dopo il 14 marzo		1	2	3	4	5	6	0	0	9	10	0	12	13	14	0	16	0	0	0	20	21	0	23	0	25	26
3234	1	53	6	6	0	0	0	0	0	0	0	0	0	0	0	0	0	0	1	0	2	2-6 marzo		0	0	0	0	0	0	0	0	0	0	0	0	0	0	0	0	0	0	0	0	0	0	0	0	0	0
865	1	44	6	6	0	0	0	0	0	0	0	0	0	0	0	0	0	0	1	0	2	7-14 marzo		1	2	0	4	0	6	0	0	9	10	0	12	0	14	15	16	0	0	0	0	21	22	0	0	25	26
368	0	29	6	6	0	0	0	0	0	0	0	0	0	0	0	0	0	0	1	0	2	7-14 marzo		1	2	0	4	5	6	0	0	9	10	0	12	13	0	0	16	0	0	0	0	0	0	0	24	25	26
2731	1	30	6	6	0	0	0	0	0	0	0	0	0	0	0	0	0	0	1	0	2	7-14 marzo		1	2	0	4	5	6	0	0	9	10	0	0	13	14	0	16	0	0	0	0	0	22	0	24	25	26
795	1	35	6	6	0	0	0	0	0	0	0	0	0	0	0	0	0	0	1	0	2	dopo il 14 marzo		1	2	3	0	5	6	0	0	9	10	11	12	13	14	0	16	0	0	0	0	0	0	23	0	25	26
970	1	45	6	6	0	0	0	0	0	0	0	0	0	0	0	0	0	0	1	0	2	2-6 marzo		1	2	3	4	5	6	0	0	9	10	0	12	13	14	0	16	0	0	0	0	21	22	0	24	25	26
742	0	62	6	8	0	0	0	0	0	0	0	0	0	0	0	0	0	0	1	0	2	2-6 marzo		1	2	3	4	5	6	0	0	0	10	11	12	13	14	15	0	0	18	0	0	21	22	0	0	0	26
3140	1	46	6	1	0	0	0	0	0	0	0	0	0	0	0	0	0	0	1	0	2	7-14 marzo		1	2	0	4	5	6	0	0	9	10	0	12	13	0	0	0	0	0	0	0	0	0	0	24	25	26
1196	0	66	6	6	1	0	0	0	0	0	7	8	0	0	0	0	0	0	1	0	2	24 febbraio - 1 marzo		1	2	3	4	5	6	7	8	9	10	11	12	13	14	15	16	0	0	0	0	21	22	23	0	25	26
1972	0	45	6	6	0	0	0	0	0	0	0	0	0	0	0	0	0	0	2	0	2	21-23 febbraio		0	2	3	4	5	6	0	8	0	10	11	12	0	14	0	0	0	0	0	0	21	0	23	24	25	26
3390	0	32	6	1	0	0	0	0	0	0	0	0	0	0	0	0	0	0	1	0	2	7-14 marzo		1	2	3	4	5	6	7	8	9	10	11	12	13	14	15	0	0	0	0	0	21	22	0	24	25	26
3436	0	30	6	6	0	0	0	0	0	0	0	0	0	0	0	0	0	0	1	0	2	7-14 marzo		1	2	3	4	5	6	0	0	9	0	0	12	13	14	0	16	0	0	0	0	21	22	0	0	25	26
3422	0	27	6	6	1	0	0	0	0	0	0	0	0	0	0	12	13	0	1	0	2	dopo il 14 marzo		1	2	0	0	0	0	0	0	0	0	0	0	13	0	0	0	0	0	0	0	0	0	0	0	25	26
191	0	35	6	3	0	0	0	0	0	0	0	0	0	0	0	0	0	0	1	0	2	7-14 marzo		1	0	3	0	5	6	7	8	9	10	11	12	13	14	15	0	0	0	0	0	21	22	0	24	25	0
2014	0	66	6	3	0	0	0	0	0	0	0	0	0	0	0	0	0	0	1	0	2	7-14 marzo		1	0	0	0	0	0	7	8	0	0	0	12	0	14	0	16	0	0	0	0	0	22	0	24	25	26
2772	0	27	6		0	0	0	0	0	0	0	0	0	0	0	0	0	0	1	0	2	7-14 marzo		1	2	3	0	5	6	0	0	9	10	0	12	0	0	0	0	0	0	0	0	21	0	0	24	25	0
2936	0	63	5	1	0	0	0	0	0	0	0	0	0	0	0	0	0	0	1	0	2	24 febbraio - 1 marzo		0	0	0	0	0	0	0	0	0	0	0	0	0	0	0	0	0	0	0	0	0	0	0	0	0	0
522	1	59	5	5	0	0	0	0	0	0	0	0	0	0	0	0	0	0	1	0	2	24 febbraio - 1 marzo		1	2	3	4	5	6	0	0	9	0	0	12	13	0	0	16	0	0	0	0	21	0	0	24	25	26
1937	0	54	5	5	0	0	0	0	0	0	0	0	0	0	0	0	0	0	1	0	2	7-14 marzo		1	0	0	4	5	6	0	0	0	0	0	12	13	14	0	0	0	0	19	0	21	0	0	24	25	26
217	1	42	5	5	0	0	0	0	0	0	0	0	0	0	0	0	0	0	1	0	2			0	0	0	0	0	0	0	0	0	0	0	0	0	0	0	0	0	0	0	0	0	0	0	0	0	0
3779	0	61	5	5	0	0	0	0	0	0	0	0	0	0	0	0	0	0	1	0	2	2-6 marzo		1	2	3	4	5	6	0	0	9	10	0	12	0	14	15	16	0	0	0	0	21	0	0	24	25	26
2211	1	43	5	5	0	0	0	0	0	0	0	0	0	0	0	0	0	0	1	0	2	7-14 marzo		1	2	3	4	5	6	7	8	9	10	11	12	13	0	0	16	0	0	0	0	21	0	0	24	25	26
3772	0	28	5	5	0	0	0	0	0	0	0	0	0	0	0	0	0	0	1	0	2	24 febbraio - 1 marzo		1	2	0	4	5	6	0	0	9	10	0	12	0	0	0	0	0	0	0	0	0	0	0	0	0	0
3655	0	44	5	5	0	0	0	0	0	0	0	0	0	0	0	0	0	0	1	0	2	7-14 marzo		0	0	0	0	5	6	0	8	9	10	0	12	0	0	0	16	0	0	0	0	0	0	0	24	25	0
1820	1	31	5	5	0	0	0	0	0	0	0	0	0	0	0	0	0	0	1	0	2	7-14 marzo		1	2	0	4	5	6	7	0	9	10	0	12	13	0	0	16	0	18	0	0	21	0	0	24	25	0
3606	0	45	5	5	0	0	0	0	0	0	0	0	0	0	0	0	0	0	1	0	2	24 febbraio - 1 marzo		1	2	3	4	5	6	0	0	9	10	0	12	0	14	0	0	0	0	0	0	21	22	0	24	25	26
1855	0	66	5	5	0	0	0	0	0	0	0	0	0	0	0	0	0	0	1	0	2	7-14 marzo		0	2	0	4	5	6	0	0	9	10	0	12	13	14	0	16	0	18	0	0	21	0	0	24	25	26
1890	0	29	5	5	0	0	0	0	0	0	0	0	0	0	0	0	0	0	1	0	2	7-14 marzo		1	2	3	4	5	6	0	8	9	10	11	12	13	14	0	16	0	0	0	0	21	0	23	0	25	26
3336	0	66	5	5	0	0	0	0	0	0	0	0	0	0	0	0	0	0	1	0	2	24 febbraio - 1 marzo		1	2	3	4	5	6	0	0	9	10	11	12	13	14	0	16	0	0	0	0	21	22	0	24	25	26
2540	0	27	5	5	0	0	0	0	0	0	0	0	0	0	0	0	0	0	1	0	2	2-6 marzo		0	0	0	0	0	0	0	0	0	0	0	0	0	0	0	0	0	0	0	0	0	0	0	0	0	0
2231	1	33	5	12	0	0	0	0	0	0	0	0	0	0	0	0	0	0	1	0	2	dopo il 14 marzo		1	0	3	4	5	6	7	0	0	10	0	12	13	14	0	16	0	0	0	0	21	0	0	24	25	26
705	0	42	5	5	0	0	0	0	0	0	0	0	0	0	0	0	0	0	1	0	2	7-14 marzo		1	0	3	4	5	6	0	0	0	10	0	12	0	0	0	0	0	0	0	0	21	0	0	24	25	0
3815	1	37	5	5	0	0	0	0	0	0	0	0	0	0	0	0	0	0	1	0	2	7-14 marzo		1	2	0	4	5	6	0	0	0	10	0	12	13	0	0	16	0	0	0	0	0	0	0	24	25	26
2896	0	27	5	5	0	0	0	0	0	0	0	0	0	0	0	0	0	0	1	0	2	7-14 marzo		1	2	0	4	5	6	0	0	9	10	0	12	0	0	0	0	0	0	0	0	0	0	0	24	25	26
3600	0	52	5	5	0	0	0	0	0	0	0	0	0	0	0	0	0	0	1	0	2	24 febbraio - 1 marzo		1	2	3	4	5	6	0	0	9	10	11	12	13	14	15	16	0	0	0	0	21	22	23	24	25	26
2891	0	63	5	5	1	2	3	0	0	6	0	0	0	0	11	0	0	0	1	0	2	7-14 marzo		1	2	3	0	0	6	0	0	9	10	11	12	0	0	0	0	0	0	0	0	21	22	23	0	25	26
237	1	49	5	5	0	0	0	0	0	0	0	0	0	0	0	0	0	0	1	0	2	24 febbraio - 1 marzo		1	2	0	4	5	6	0	0	9	0	0	12	13	14	0	0	0	0	0	0	21	0	0	24	25	26
2410	0	67	5	5	0	0	0	0	0	0	0	0	0	0	0	0	0	0	1	0	2	7-14 marzo		1	2	3	4	5	6	0	0	9	10	0	12	13	0	15	0	0	0	0	0	21	0	0	24	25	26
1324	0	68	5	5	0	0	0	0	0	0	0	0	0	0	0	0	0	0	1	0	2	7-14 marzo		1	2	3	4	5	6	0	0	0	10	11	12	0	0	0	16	0	0	0	20	0	0	0	24	0	0
2144	0	31	5	5	0	0	0	0	0	0	0	0	0	0	0	0	0	0	1	0	2	7-14 marzo		1	2	3	4	5	6	0	0	9	10	0	12	13	14	15	16	0	0	0	0	21	0	0	24	25	26
3298	0	66	5	5	0	0	0	0	0	0	0	0	0	0	0	0	0	0	1	0	2	7-14 marzo		1	2	3	4	5	6	0	0	9	10	0	12	13	14	15	0	0	0	0	0	21	22	0	0	25	26
2214	1	39	5	13	0	0	0	0	0	0	0	0	0	0	0	0	0	0	1	0	2	dopo il 14 marzo		1	2	3	4	5	6	0	0	9	10	11	12	13	14	0	16	0	0	0	0	21	0	23	24	25	26
335	1	35	5	5	0	0	0	0	0	0	0	0	0	0	0	0	0	0	1	0	2	dopo il 14 marzo		1	2	0	4	5	6	7	8	9	10	0	12	13	14	0	16	0	0	0	0	0	0	23	24	25	26
1488	1	38	5	5	0	0	0	0	0	0	0	0	0	0	0	0	0	0	1	0	2	2-6 marzo		1	2	3	4	5	6	7	8	9	0	0	12	13	14	15	16	0	0	0	0	0	22	0	24	25	26
1658	1	41	5	5	0	0	0	0	0	0	0	0	0	0	0	0	0	0	1	0	2	7-14 marzo		1	2	3	4	5	6	0	0	9	0	0	12	13	0	0	0	0	0	0	0	21	0	23	0	25	26
3760	0	41	5	5	0	0	0	0	0	0	0	0	0	0	0	0	0	0	1	0	2	2-6 marzo		1	2	3	4	5	6	7	8	9	10	11	12	13	14	15	16	0	0	0	0	21	22	0	24	25	26
569	0	50	5	5	0	0	0	0	0	0	0	0	0	0	0	0	0	0	1	0	2	7-14 marzo		1	0	0	4	5	0	0	0	0	0	0	12	0	0	0	16	0	0	0	0	0	0	0	24	0	0
2239	0	50	5	5	1	2	3	4	0	6	7	0	0	10	11	12	13	0	1	0	2	24 febbraio - 1 marzo		1	2	3	4	5	6	0	0	9	10	0	12	13	0	0	16	0	0	0	0	21	22	0	24	25	26
1548	1	39	5	6	0	0	0	0	0	0	0	0	0	0	0	0	0	0	1	0	2	2-6 marzo		1	0	3	0	5	6	0	0	9	10	0	12	13	14	0	16	0	0	0	0	21	0	0	24	25	26
898	0	65	5	6	0	0	0	0	0	0	0	0	0	0	0	0	0	0	1	0	2	7-14 marzo		1	2	3	4	0	6	0	0	9	10	0	12	13	0	0	0	0	0	0	0	21	0	23	24	25	0
904	0	51	5	5	0	0	0	0	0	0	0	0	0	0	0	0	0	0	1	0	2	7-14 marzo		1	2	3	4	5	6	0	0	9	10	11	12	13	14	15	16	0	0	0	0	21	22	0	24	25	26
3186	0	60	5	5	0	0	0	0	0	0	0	0	0	0	0	0	0	0	1	0	2	7-14 marzo		1	2	3	4	5	6	0	0	9	10	0	12	13	14	15	0	0	0	0	0	21	22	0	0	25	26
3299	0	55	5	5	0	0	0	0	0	0	0	0	0	0	0	0	0	0	1	0	2	7-14 marzo		0	2	3	0	0	0	0	0	0	0	0	12	0	0	15	0	0	0	0	0	21	0	0	24	25	26
3196	0	30	5	5	0	0	0	0	0	0	0	0	0	0	0	0	0	0	1	0	2	7-14 marzo		1	2	0	4	5	0	0	0	9	10	11	0	0	0	15	16	0	0	0	0	0	22	0	0	25	0
1707	0	49	5	5	0	0	0	0	0	0	0	0	0	0	0	0	0	0	1	0	2	2-6 marzo		1	2	3	4	5	6	0	0	9	10	11	12	13	14	0	16	0	0	0	0	21	0	23	24	25	26
2726	0	54	5	5	0	0	0	0	0	0	0	0	0	0	0	0	0	0	1	0	2	2-6 marzo		1	2	3	4	5	6	0	0	9	10	11	12	13	14	0	16	0	0	0	0	21	0	0	24	25	26
833	1	58	5	5	0	0	0	0	0	0	0	0	0	0	0	0	0	0	1	0	2	21-23 febbraio		1	2	3	4	5	6	0	0	0	10	11	12	13	14	0	16	0	0	0	0	21	0	0	24	25	26
1586	0	35	5	5	0	0	0	0	0	0	0	0	0	0	0	0	0	0	1	0	2	7-14 marzo		0	2	0	4	5	0	0	0	9	10	0	12	0	14	15	16	0	0	0	0	21	0	0	24	25	26
2418	0	60	5	5	0	0	0	0	0	0	0	0	0	0	0	0	0	0	1	0	2	24 febbraio - 1 marzo		1	2	0	4	5	6	0	0	0	0	11	12	13	14	0	16	0	0	0	0	21	0	0	24	25	26
1677	1	42	5	5	1	2	0	0	0	0	0	0	0	0	0	12	0	0	1	0	2	2-6 marzo		1	2	3	4	5	6	0	8	9	10	11	12	13	14	15	16	0	0	0	0	21	22	0	0	25	26
3123	1	39	5	5	0	0	0	0	0	0	0	0	0	0	0	0	0	0	1	0	2	21-23 febbraio		1	2	3	4	5	6	7	8	9	10	11	12	13	14	0	0	0	0	0	0	21	0	0	24	25	26
1570	1	39	5	5	0	0	0	0	0	0	0	0	0	0	0	0	0	0	1	0	2	7-14 marzo		1	2	0	4	5	6	0	0	0	0	0	12	13	0	0	16	0	0	0	0	21	0	0	24	25	26
2988	0	32	5	5	0	0	0	0	0	0	0	0	0	0	0	0	0	0	1	0	2	7-14 marzo		1	2	0	4	5	6	0	0	9	10	11	12	13	14	0	0	0	0	0	0	21	0	0	24	25	26
2720	0	52	5	5	0	0	0	0	0	0	0	0	0	0	0	0	0	0	1	0	2	7-14 marzo		1	2	3	4	5	6	0	0	9	10	0	12	13	14	0	0	0	0	0	0	21	0	0	24	25	26
3367	0	62	5	5	0	0	0	0	0	0	0	0	0	0	0	0	0	0	1	0	2	2-6 marzo		1	2	3	0	0	6	0	8	9	0	0	12	13	14	15	0	0	0	0	0	21	22	0	24	25	26
3583	0	63	5	5	1	2	0	4	5	0	0	0	0	0	0	0	0	0	1	0	2	2-6 marzo		1	2	3	4	5	6	0	0	0	0	0	12	13	0	0	0	0	0	0	20	0	22	23	0	25	26
3266	0	46	5	5	0	0	0	0	0	0	0	0	0	0	0	0	0	0	1	0	2	7-14 marzo		0	2	0	0	5	6	0	0	9	10	0	12	13	14	0	0	0	0	0	0	21	0	0	24	25	26
3359	0	57	5	5	0	0	0	0	0	0	0	0	0	0	0	0	0	0	1	0	2	7-14 marzo		1	2	0	4	5	6	0	0	9	10	0	0	13	0	0	0	0	0	0	20	0	0	0	24	25	26
1325	0	63	5	5	0	0	0	0	0	0	0	0	0	0	0	0	0	0	1	0	2	2-6 marzo		1	2	3	4	5	6	0	0	0	10	0	12	0	0	0	0	0	0	0	0	21	0	0	24	0	0
2071	0	65	5	5	0	0	0	0	0	0	0	0	0	0	0	0	0	0	1	0	2	21-23 febbraio		1	2	0	4	5	6	0	0	9	10	11	12	13	14	0	16	0	0	0	0	21	22	0	0	25	26
752	0	71	5	5	0	0	0	0	0	0	0	0	0	0	0	0	0	0	1	0	2	2-6 marzo		1	2	0	4	5	6	0	0	9	10	0	12	13	14	0	16	0	0	0	0	21	0	0	24	25	26
2400	0	60	5	5	0	0	0	0	0	0	0	0	0	0	0	0	0	0	1	0	2	21-23 febbraio		1	2	0	4	5	6	0	0	9	10	11	12	13	14	15	0	0	0	0	0	21	0	0	24	25	26
955	0	66	5	5	0	0	0	0	0	0	0	0	0	0	0	0	0	0	1	0	2	24 febbraio - 1 marzo		1	0	0	0	0	0	0	0	0	0	0	0	0	0	0	0	0	0	0	0	0	0	0	0	0	0
3741	1	62	5	5	0	0	0	0	0	0	0	0	0	0	0	0	0	0	1	0	2	2-6 marzo		1	2	0	4	5	6	0	0	9	10	0	0	0	14	15	0	0	0	0	0	21	0	0	24	25	26
3220	0	47	5	5	0	0	0	0	0	0	0	0	0	0	0	0	0	0	1	0	2	7-14 marzo		1	0	0	0	0	0	0	0	0	0	0	0	0	0	0	0	0	0	0	0	0	0	0	0	0	0
1710	1	38	5	6	0	0	0	0	0	0	0	0	0	0	0	0	0	0	1	0	2	2-6 marzo		1	2	0	0	5	6	0	0	9	0	0	0	13	0	15	0	0	0	0	0	21	0	0	24	25	26
1813	0	45	5	1	1	0	3	0	0	0	7	0	0	0	0	0	0	0	1	0	2	2-6 marzo		1	0	3	4	5	6	0	0	9	10	0	12	13	14	15	0	0	0	0	0	21	22	0	24	25	26
1284	0	67	5	5	1	0	0	0	0	0	0	0	0	0	0	0	0	0	1	0	2	7-14 marzo		1	2	3	4	5	6	7	8	9	10	0	12	13	14	0	16	0	0	0	0	21	0	0	24	25	26
2498	1	34	5	5	0	0	0	0	0	0	0	0	0	0	0	0	0	0	1	0	2	2-6 marzo		1	2	3	4	5	6	7	0	9	0	11	12	13	14	0	16	0	0	0	0	21	0	0	24	25	26
1647	0	25	5	5	0	0	0	0	0	0	0	0	0	0	0	0	0	0	1	0	2	2-6 marzo		1	2	3	4	5	6	0	0	9	10	11	12	13	14	0	16	0	0	0	0	21	22	0	24	25	26
691	1	53	5	5	0	0	0	0	0	0	0	0	0	0	0	0	0	0	1	0	2	7-14 marzo		1	2	3	4	5	6	0	0	0	0	0	12	13	14	0	16	0	0	0	0	21	22	0	24	25	26
2118	0	58	5	5	0	0	0	0	0	0	0	0	0	0	0	0	0	0	1	0	2	7-14 marzo		1	2	3	4	5	6	7	8	9	10	0	12	13	14	15	0	0	0	0	0	21	0	0	24	25	26
2907	0	45	5	5	0	0	0	0	0	0	0	0	0	0	0	0	0	0	1	0	2	7-14 marzo		1	2	0	4	5	0	0	0	9	10	0	12	0	14	0	0	0	0	0	0	0	22	0	24	25	26
2926	0	49	5	5	0	0	0	0	0	0	0	0	0	0	0	0	0	0	1	0	2	7-14 marzo		1	2	3	4	5	6	7	8	0	0	0	12	13	14	0	16	0	0	0	0	0	22	0	24	0	26
2753	0	43	5	6	1	0	3	0	0	6	0	0	9	0	0	0	0	0	1	0	2	7-14 marzo		1	2	0	4	5	6	7	8	9	10	11	12	13	14	0	0	17	0	0	0	21	0	0	24	25	26
3307	1	35	5	5	1	2	3	4	0	6	0	0	0	10	0	12	13	0	1	0	2	7-14 marzo		1	2	0	0	0	6	0	0	9	0	0	12	13	0	0	0	0	0	0	0	21	0	0	24	25	0
3171	0	66	5	5	0	0	0	0	0	0	0	0	0	0	0	0	0	0	1	0	2	7-14 marzo		1	2	3	4	5	6	0	0	9	0	0	12	13	0	0	16	0	0	0	0	0	22	0	0	25	26
2763	1	41	5	5	0	0	0	0	0	0	0	0	0	0	0	0	0	0	1	0	2	24 febbraio - 1 marzo		1	2	3	4	5	6	0	0	9	10	0	12	13	14	0	16	0	18	0	0	21	0	0	24	25	26
945	1	36	5	5	0	0	0	0	0	0	0	0	0	0	0	0	0	0	1	0	2	7-14 marzo		1	2	3	4	5	6	0	0	9	10	11	12	13	14	0	16	0	0	0	0	0	0	0	24	25	26
3319	0	28	5	5	0	0	0	0	0	0	0	0	0	0	0	0	0	0	1	0	2	2-6 marzo		1	2	3	4	5	6	0	0	9	10	11	12	13	14	0	16	0	0	0	0	21	0	0	24	25	0
2533	0	31	5	5	0	0	0	0	0	0	0	0	0	0	0	0	0	0	1	0	2	7-14 marzo		0	2	0	0	5	6	0	0	0	10	0	12	13	14	0	16	0	0	0	0	21	0	0	24	25	26
1621	0	31	5	5	0	0	0	0	0	0	0	0	0	0	0	0	0	0	1	0	2	2-6 marzo		1	2	3	4	5	6	0	0	9	10	0	12	13	0	0	16	17	0	0	0	21	22	0	0	25	26
2354	0	62	5	5	0	0	0	0	0	0	0	0	0	0	0	0	0	0	1	0	2	2-6 marzo		1	2	3	4	5	6	0	8	9	10	0	12	13	14	0	16	0	0	0	0	21	22	0	0	25	26
1585	0	30	5	5	0	0	0	0	0	0	0	0	0	0	0	0	0	0	1	0	2	7-14 marzo		1	2	3	4	5	6	0	0	9	10	11	12	13	14	0	16	0	0	0	0	21	0	0	24	25	26
1381	0	61	5	5	0	0	0	0	0	0	0	0	0	0	0	0	0	0	1	0	2	2-6 marzo		1	2	3	4	5	6	0	0	9	10	11	12	13	14	0	0	0	0	0	0	21	22	23	0	25	26
555	0	63	5	5	0	0	0	0	0	0	0	0	0	0	0	0	0	0	1	0	2	7-14 marzo		1	2	0	4	5	6	0	0	9	10	0	12	13	14	0	16	0	0	0	0	21	0	0	24	25	26
3512	0	40	5	5	0	0	0	0	0	0	0	0	0	0	0	0	0	0	1	0	2	2-6 marzo		1	2	3	4	5	6	0	0	9	10	0	12	13	14	0	16	0	18	0	0	21	22	23	24	25	0
3033	0	66	5	5	0	0	0	0	0	0	0	0	0	0	0	0	0	0	1	0	2	7-14 marzo		1	2	3	4	5	6	0	0	0	10	0	12	13	14	0	16	0	0	0	0	21	0	0	24	25	26
3609	0	54	5	5	0	0	0	0	0	0	0	0	0	0	0	0	0	0	1	0	2	7-14 marzo		1	2	3	4	5	6	7	8	9	10	11	12	13	14	0	0	0	0	0	20	21	22	0	0	25	26
2658	0	63	5	5	0	0	0	0	0	0	0	0	0	0	0	0	0	0	1	0	2	7-14 marzo		1	2	3	4	5	6	0	0	9	10	0	12	13	14	0	16	0	0	0	0	21	0	0	24	25	26
1882	0	66	5	5	0	0	0	0	0	0	0	0	0	0	0	0	0	0	1	0	2	dopo il 14 marzo		0	0	0	0	0	0	0	0	0	0	0	0	0	0	0	0	0	0	0	0	0	0	0	0	0	0
706	0	61	5	5	0	0	0	0	0	0	0	0	0	0	0	0	0	0	1	0	2	dopo il 14 marzo		1	2	0	4	5	6	0	0	9	10	0	12	0	14	0	16	0	0	0	0	21	0	0	24	25	26
1834	1	43	5	5	0	0	0	0	0	0	0	0	0	0	0	0	0	0	1	0	2	dopo il 14 marzo		1	2	3	4	5	6	0	8	0	10	0	12	13	14	0	0	17	0	0	0	21	22	23	0	25	26
373	0	60	5	5	0	0	0	0	0	0	0	0	0	0	0	0	0	0	1	0	2	dopo il 14 marzo		1	2	3	4	5	6	7	8	9	0	11	12	13	14	15	0	0	0	0	0	21	22	0	24	25	26
2306	0	64	5	5	0	0	0	0	0	0	0	0	0	0	0	0	0	0	1	0	2	7-14 marzo		1	2	3	4	0	6	0	0	0	10	0	12	13	14	0	0	0	0	0	0	21	0	23	24	25	26
2775	1	37	5	5	0	0	0	0	0	0	0	0	0	0	0	0	0	0	1	0	2	7-14 marzo		1	2	3	4	5	6	0	8	9	10	11	12	13	14	0	16	0	0	0	0	0	0	0	24	25	26
3320	0	53	5	5	0	0	0	0	0	0	0	0	0	0	0	0	0	0	1	0	2	7-14 marzo		1	2	3	4	5	6	0	0	9	10	11	12	13	14	0	16	0	0	0	0	21	22	0	0	25	26
2252	0	35	5	5	0	0	0	0	0	0	0	0	0	0	0	0	0	0	1	0	2	24 febbraio - 1 marzo		1	2	3	4	5	6	0	8	9	10	11	12	13	14	0	0	0	0	0	0	21	0	0	24	25	26
463	1	35	5	5	0	0	0	0	0	0	0	0	0	0	0	0	0	0	1	0	2	7-14 marzo		1	2	0	0	0	6	0	0	9	10	0	0	13	14	0	0	0	0	0	0	0	0	0	24	25	26
2659	1	31	5	5	0	0	0	0	0	0	0	0	0	0	0	0	0	0	1	0	2	dopo il 14 marzo		1	2	3	4	5	6	0	0	9	10	11	12	13	14	0	16	0	0	0	0	21	22	0	24	25	26
2961	1	41	5	5	0	0	0	0	0	0	0	0	0	0	0	0	0	0	1	0	2	2-6 marzo		1	2	3	4	5	6	0	8	9	10	0	12	13	14	0	16	0	0	0	0	21	22	0	0	25	26
3111	0	36	5	5	0	0	0	0	0	0	0	0	0	0	0	0	0	0	1	0	2	7-14 marzo		1	2	3	4	5	6	0	0	9	10	0	12	13	14	0	16	0	0	0	0	21	0	0	24	25	26
801	0	59	5	5	0	0	0	0	0	0	0	0	0	0	0	0	0	0	1	0	2	7-14 marzo		1	2	3	4	5	6	0	0	9	10	0	12	13	14	15	0	0	0	0	0	21	22	0	0	25	26
150	0	55	5	5	0	0	0	0	0	0	0	0	0	0	0	0	0	0	1	0	2	dopo il 14 marzo		1	2	3	4	5	6	0	0	0	10	0	12	13	14	0	0	0	0	0	0	21	0	23	24	25	26
656	0	58	5	5	0	0	0	0	0	0	0	0	0	0	0	0	0	0	1	0	2	7-14 marzo		1	2	3	0	0	6	0	0	9	10	11	12	0	0	0	0	0	0	0	0	0	0	0	24	25	0
944	0	56	5	5	0	0	0	0	0	0	0	0	0	0	0	0	0	0	1	0	2	7-14 marzo		1	0	3	4	5	6	0	0	9	10	11	12	13	14	0	16	0	0	0	0	21	0	0	24	25	0
2623	1	62	5	5	0	0	0	0	0	0	0	0	0	0	0	0	0	0	1	0	2	dopo il 14 marzo		1	2	3	4	5	6	0	8	9	10	0	12	13	14	0	0	17	0	0	0	21	22	0	0	25	26
1152	0	52	5	5	1	2	0	4	0	0	7	0	0	0	0	12	0	0	1	0	2	dopo il 14 marzo		1	2	0	4	5	6	0	0	9	10	0	12	13	14	0	16	0	0	0	0	21	0	0	24	25	26
111	1	44	5	5	1	2	0	0	0	6	7	8	0	0	11	0	0	0	1	0	2	7-14 marzo		1	2	3	4	5	6	0	0	9	0	11	12	13	0	15	16	0	0	0	0	21	0	0	24	25	26
2319	0	47	5	5	0	0	0	0	0	0	0	0	0	0	0	0	0	0	1	0	2	7-14 marzo		0	0	0	0	0	0	0	0	0	0	0	0	0	0	0	0	0	0	0	0	0	0	0	0	0	0
319	0	37	5	5	0	0	0	0	0	0	0	0	0	0	0	0	0	0	1	0	2	7-14 marzo		1	2	3	4	5	6	0	0	9	10	11	12	13	0	0	16	0	0	0	0	0	0	0	24	25	26
458	1	42	5	5	0	0	0	0	0	0	0	0	0	0	0	0	0	0	1	0	2	2-6 marzo		1	2	3	4	0	0	0	0	9	10	11	12	13	14	15	16	0	0	0	0	21	0	0	24	0	26
1822	1	29	5	5	0	0	0	0	0	0	0	0	0	0	0	0	0	0	1	0	2	21-23 febbraio		1	2	3	0	5	6	0	8	0	10	11	12	13	14	0	16	0	0	0	0	21	0	23	0	25	26
351	0	30	5	5	0	0	0	0	0	0	0	0	0	0	0	0	0	0	1	0	2	7-14 marzo		1	2	0	4	5	6	0	0	9	10	0	12	13	14	0	16	0	0	0	0	0	22	0	0	25	0
1117	0	36	5	5	0	0	0	0	0	0	0	0	0	0	0	0	0	0	1	0	2	2-6 marzo		1	2	0	4	5	6	0	0	9	10	0	12	13	0	15	16	0	0	0	0	21	22	0	24	25	26
2606	0	58	5	5	0	0	0	0	0	0	0	0	0	0	0	0	0	0	1	0	2	2-6 marzo		1	2	3	0	0	6	0	0	9	10	11	12	0	14	15	0	0	0	0	0	21	22	0	0	25	26
2229	0	65	5	5	1	0	0	0	0	6	0	0	9	0	0	0	0	0	1	0	2	7-14 marzo		1	2	0	0	5	6	0	0	0	10	0	12	13	14	0	16	0	0	0	0	0	22	0	24	25	26
2849	0	37	5	5	0	0	0	0	0	0	0	0	0	0	0	0	0	0	1	0	2	7-14 marzo		1	2	3	4	5	6	0	0	0	10	11	12	13	14	0	16	0	0	0	0	21	0	0	24	25	0
2069	1	54	5	5	0	0	0	0	0	0	0	0	0	0	0	0	0	0	1	0	2	dopo il 14 marzo		1	2	3	4	5	0	0	0	9	10	0	12	13	14	15	0	0	0	0	0	21	22	0	0	25	26
2633	0	58	5	5	0	0	0	0	0	0	0	0	0	0	0	0	0	0	1	0	2	7-14 marzo		1	2	3	0	0	6	0	0	9	10	0	12	13	0	0	0	17	0	0	0	21	22	0	0	25	26
432	0	63	5	5	0	0	0	0	0	0	0	0	0	0	0	0	0	0	1	0	2	7-14 marzo		1	2	0	4	5	6	0	0	9	0	0	12	13	14	0	0	0	0	0	0	21	0	23	0	25	26
435	1	37	5	5	0	0	0	0	0	0	0	0	0	0	0	0	0	0	1	0	2	7-14 marzo		1	2	3	4	5	6	7	0	9	10	0	12	13	14	0	0	0	0	0	0	21	0	0	24	25	26
553	0	55	5	5	1	0	0	0	0	6	0	0	0	0	0	12	13	0	1	0	2	7-14 marzo		1	2	3	0	5	6	0	0	9	10	0	12	13	14	0	16	0	0	0	0	21	22	0	24	25	26
3684	0	57	5	5	0	0	0	0	0	0	0	0	0	0	0	0	0	0	1	0	2	21-23 febbraio		1	2	3	4	5	6	7	0	9	10	0	12	13	14	0	0	0	0	19	0	21	0	0	24	25	26
2703	1	30	5	5	0	0	0	0	0	0	0	0	0	0	0	0	0	0	1	0	2	24 febbraio - 1 marzo		1	2	3	0	0	6	0	0	9	10	0	12	13	14	0	16	0	0	0	0	21	0	0	24	25	26
300	0	50	5	5	0	0	0	0	0	0	0	0	0	0	0	0	0	0	1	0	2	2-6 marzo		1	2	3	4	0	6	0	0	9	10	11	12	13	14	0	0	0	18	0	0	21	0	0	24	25	26
1737	0	66	5	5	0	0	0	0	0	0	0	0	0	0	0	0	0	0	1	0	2	7-14 marzo		1	2	3	4	5	6	0	0	9	10	0	12	13	0	0	16	0	18	0	0	21	0	0	24	25	0
1564	1	33	5	5	0	0	0	0	0	0	0	0	0	0	0	0	0	0	1	0	2	7-14 marzo		1	2	3	4	5	6	7	8	9	10	11	12	13	0	15	16	0	0	0	0	21	22	0	0	25	26
3194	0	44	5	5	0	0	0	0	0	0	0	0	0	0	0	0	0	0	1	0	2	2-6 marzo		1	2	3	4	5	6	7	8	9	10	0	12	13	14	0	0	0	0	0	0	21	22	23	0	25	26
1601	0	53	5	5	0	0	0	0	0	0	0	0	0	0	0	0	0	0	1	0	2	2-6 marzo		1	2	3	4	5	6	0	8	9	10	11	12	13	14	0	0	17	0	0	0	21	0	0	24	25	26
573	1	63	5	5	0	0	0	0	0	0	0	0	0	0	0	0	0	0	1	0	2	2-6 marzo		1	2	3	4	5	6	7	8	9	10	11	12	13	14	0	0	0	0	0	0	21	22	23	0	25	26
1539	0	64	5	5	1	0	3	0	0	6	7	8	0	0	0	12	0	14	1	0	2	2-6 marzo		1	2	3	4	5	6	0	0	0	10	0	12	13	14	0	16	0	0	0	0	21	22	0	24	25	26
2793	0	40	5	5	0	0	0	0	0	0	0	0	0	0	0	0	0	0	1	0	2	7-14 marzo		1	2	3	4	5	6	0	0	9	10	0	12	13	14	0	16	0	0	0	0	21	0	0	24	25	26
3551	0	60	5	5	0	0	0	0	0	0	0	0	0	0	0	0	0	0	1	0	2	7-14 marzo		1	2	3	4	5	0	7	8	9	10	11	12	13	14	0	0	0	0	0	0	0	22	0	0	25	26
2634	0	62	5	5	0	0	0	0	0	0	0	0	0	0	0	0	0	0	1	0	2	7-14 marzo		1	2	0	4	5	6	0	0	9	10	0	12	13	14	15	16	0	0	0	0	21	0	0	24	25	26
2140	1	45	5	5	0	0	0	0	0	0	0	0	0	0	0	0	0	0	1	0	2	dopo il 14 marzo		1	2	0	4	0	6	0	0	0	10	0	12	13	14	0	16	0	0	0	0	21	0	0	24	0	26
2821	0	57	5	5	0	0	0	0	0	0	0	0	0	0	0	0	0	0	1	0	2	7-14 marzo		1	2	0	4	5	6	0	0	9	10	0	12	13	14	0	16	0	0	0	0	21	22	0	0	25	26
3450	1	59	5	5	0	0	0	0	0	0	0	0	0	0	0	0	0	0	1	0	2	2-6 marzo		1	2	3	4	5	6	0	8	9	10	11	12	13	14	15	0	0	0	0	0	21	22	23	0	25	26
3447	0	56	5	5	1	2	3	4	0	0	0	0	0	0	0	0	0	0	1	0	2	2-6 marzo		1	2	0	0	5	6	7	8	9	10	11	12	13	14	0	16	0	0	0	0	21	22	0	0	25	26
1649	0	58	5	5	0	0	0	0	0	0	0	0	0	0	0	0	0	0	1	0	2	2-6 marzo		1	2	3	4	5	6	7	8	9	10	11	12	13	14	15	16	0	0	0	0	21	22	0	24	25	26
1685	0	59	5	5	0	0	0	0	0	0	0	0	0	0	0	0	0	0	1	0	2	7-14 marzo		0	0	0	0	0	6	0	0	0	0	0	12	13	0	15	16	0	0	0	0	21	0	23	0	0	0
2646	1	51	5	5	0	0	0	0	0	0	0	0	0	0	0	0	0	0	1	0	2	2-6 marzo		1	2	3	4	5	6	0	0	9	10	11	12	13	14	0	16	0	0	0	0	21	22	0	24	25	26
825	0	56	5	5	0	0	0	0	0	0	0	0	0	0	0	0	0	0	1	0	2	7-14 marzo		1	2	3	4	5	6	0	0	9	10	11	12	13	14	0	16	0	0	0	0	21	22	23	24	25	26
2470	0	62	5	9	0	0	0	0	0	0	0	0	0	0	0	0	0	0	1	0	2	21-23 febbraio		1	2	3	4	5	6	7	8	9	10	11	12	13	14	0	16	0	0	0	0	21	0	23	24	25	26
2085	0	44	5	13	0	0	0	0	0	0	0	0	0	0	0	0	0	0	1	0	2	24 febbraio - 1 marzo		0	2	0	4	5	0	0	0	0	10	11	12	13	14	0	0	0	0	0	0	21	0	0	24	25	26
3259	1	55	5	5	0	0	0	0	0	0	0	0	0	0	0	0	0	0	1	0	2	2-6 marzo		1	2	3	4	5	6	7	8	9	10	11	12	13	14	0	16	0	0	0	0	21	0	0	24	25	26
1889	0	36	5	5	0	0	0	0	0	0	0	0	0	0	0	0	0	0	1	0	2	dopo il 14 marzo		1	2	3	4	5	6	0	0	9	10	0	12	13	14	0	16	0	0	0	0	21	22	0	24	25	0
3173	1	37	5	5	0	0	0	0	0	0	0	0	0	0	0	0	0	0	1	0	2	7-14 marzo		1	2	0	4	5	6	0	0	9	10	0	12	13	0	0	16	0	0	0	0	21	0	0	24	25	26
3659	0	45	5	5	0	0	0	0	0	0	0	0	0	0	0	0	0	0	1	0	2	7-14 marzo		1	2	0	4	5	6	0	0	0	10	0	0	13	0	0	16	0	0	0	0	21	0	0	24	25	26
1661	0	52	5	5	0	0	0	0	0	0	0	0	0	0	0	0	0	0	1	0	2	7-14 marzo		1	2	0	0	0	6	0	0	9	0	0	12	13	14	0	16	0	0	0	0	0	0	0	24	25	26
3515	0	57	5	5	0	0	0	0	0	0	0	0	0	0	0	0	0	0	1	0	2	2-6 marzo		1	2	3	4	5	6	0	0	9	10	0	12	13	14	0	16	0	0	0	0	21	22	0	24	25	26
2657	0	60	5	5	0	0	0	0	0	0	0	0	0	0	0	0	0	0	1	0	2	2-6 marzo		1	2	3	4	5	0	0	0	9	10	0	12	13	14	15	0	0	0	0	0	21	22	0	24	25	26
1368	0	63	5	5	0	0	0	0	0	0	0	0	0	0	0	0	0	0	1	0	2	21-23 febbraio		1	0	0	0	0	6	0	0	9	0	0	12	13	14	15	16	0	0	0	0	0	0	0	24	25	26
2023	1	61	5	5	0	0	0	0	0	0	0	0	0	0	0	0	0	0	1	0	2	7-14 marzo		1	2	3	4	5	6	0	0	9	10	0	12	13	14	15	0	0	0	0	0	21	0	0	24	25	26
2500	1	62	5	5	0	0	0	0	0	0	0	0	0	0	0	0	0	0	1	0	2	7-14 marzo		1	2	0	4	5	6	0	0	9	10	11	12	13	14	0	0	17	0	0	0	21	22	23	24	25	26
2765	0	61	5	5	0	0	0	0	0	0	0	0	0	0	0	0	0	0	1	0	2	24 febbraio - 1 marzo		1	0	0	4	5	6	0	0	9	0	0	12	13	14	15	0	0	0	0	0	21	0	0	24	25	26
1571	0	61	5	5	0	0	0	0	0	0	0	0	0	0	0	0	0	0	1	0	2	7-14 marzo		1	2	3	4	5	6	0	0	9	10	11	12	13	14	0	16	0	0	0	0	21	22	23	24	25	26
3075	0	27	5	13	0	0	0	0	0	0	0	0	0	0	0	0	0	0	1	0	2	24 febbraio - 1 marzo		0	2	3	4	5	6	0	0	0	10	11	12	13	14	0	16	0	0	0	0	21	22	0	0	25	26
3105	0	37	5	5	0	0	0	0	0	0	0	0	0	0	0	0	0	0	1	0	2	2-6 marzo		1	2	0	0	0	6	0	0	9	0	0	12	13	0	0	16	0	0	0	0	21	0	0	24	25	26
3400	0	29	5	5	0	0	0	0	0	0	0	0	0	0	0	0	0	0	1	0	2	2-6 marzo	2-6 marzo	1	2	3	4	5	6	0	0	9	10	11	12	13	14	15	0	0	0	0	0	21	22	0	24	25	26
3250	0	49	5	5	0	0	0	0	0	0	0	0	0	0	0	0	0	0	1	0	2	7-14 marzo		1	2	3	4	5	6	7	8	9	10	11	12	13	14	15	0	0	0	0	0	21	0	23	0	25	26
180	0	66	5	5	0	0	0	0	0	0	0	0	0	0	0	0	0	0	1	0	2	2-6 marzo		1	2	3	4	5	6	0	0	9	0	0	12	13	14	0	0	0	0	0	0	0	0	23	0	25	26
2237	0	71	5	5	0	0	0	0	0	0	0	0	0	0	0	0	0	0	1	0	2	2-6 marzo		0	0	0	4	5	6	0	0	9	10	0	12	13	14	0	16	0	0	0	0	21	0	0	24	25	26
3143	0	38	5	5	0	0	0	0	0	0	0	0	0	0	0	0	0	0	1	0	2	24 febbraio - 1 marzo		1	2	3	4	5	6	7	8	9	10	11	12	0	14	0	16	0	0	0	0	21	22	23	24	25	26
2460	0	65	5	5	0	0	0	0	0	0	0	0	0	0	0	0	0	0	1	0	2	2-6 marzo		1	2	3	4	5	6	7	8	0	10	0	12	13	14	15	0	0	0	0	0	21	0	0	24	25	26
1141	1	35	5	5	0	0	0	0	0	0	0	0	0	0	0	0	0	0	1	0	2	2-6 marzo		1	2	0	0	5	6	0	8	9	10	11	12	13	0	0	16	0	0	0	0	21	0	23	24	25	26
3159	1	58	5	5	0	0	0	0	0	0	0	0	0	0	0	0	0	0	1	0	2	2-6 marzo		0	0	0	0	0	0	0	0	9	10	11	0	13	0	15	0	0	0	0	0	21	0	23	0	25	0
2513	0	47	5	5	0	0	0	0	0	0	0	0	0	0	0	0	0	0	1	0	2	7-14 marzo		1	2	3	4	5	6	7	8	9	10	11	12	13	14	15	0	0	0	0	0	21	0	0	24	25	26
3042	0	63	5	5	0	0	0	0	0	0	0	0	0	0	0	0	0	0	1	0	2	7-14 marzo		0	2	3	4	5	6	0	0	9	10	0	12	13	14	0	0	0	0	0	0	21	22	0	24	25	26
2807	0	39	5	5	0	0	0	0	0	0	0	0	0	0	0	0	0	0	1	0	2	2-6 marzo		0	0	0	0	0	0	0	0	0	0	0	0	0	0	0	0	0	0	0	0	0	0	0	0	0	0
2104	0	36	5	5	1	2	0	0	0	0	7	0	0	0	0	12	13	0	1	0	2	7-14 marzo		1	0	0	4	5	6	0	0	9	10	0	12	13	14	0	16	0	0	0	0	0	0	0	24	25	26
1642	0	37	5	5	0	0	0	0	0	0	0	0	0	0	0	0	0	0	1	0	2	7-14 marzo		1	2	0	4	0	6	7	0	9	10	11	12	13	0	15	0	0	0	0	0	21	0	0	24	25	26
2162	0	42	5	5	0	0	0	0	0	0	0	0	0	0	0	0	0	0	1	0	2	7-14 marzo		1	2	3	0	0	6	0	0	0	10	0	12	13	0	0	0	0	0	0	0	0	0	0	24	25	26
1617	1	47	5	5	0	0	0	0	0	0	0	0	0	0	0	0	0	0	1	0	2	7-14 marzo		1	2	3	4	5	6	0	0	9	10	11	12	13	14	0	0	0	0	0	0	21	22	0	0	25	26
3254	0	51	5	5	0	0	0	0	0	0	0	0	0	0	0	0	0	0	1	0	2	2-6 marzo		1	2	3	4	5	6	0	0	9	10	0	12	13	14	0	0	0	0	0	0	21	0	0	24	25	26
2236	1	57	5	5	0	0	0	0	0	0	0	0	0	0	0	0	0	0	1	0	2	24 febbraio - 1 marzo		1	2	3	4	5	6	0	0	9	10	0	12	13	14	15	0	0	0	0	0	21	0	0	24	25	26
2299	1	37	5	5	1	2	0	4	0	6	7	0	0	10	0	0	0	0	1	0	2	7-14 marzo		1	2	3	4	5	6	0	0	9	10	0	12	13	14	0	16	0	0	0	0	21	0	0	24	25	26
980	0	31	5	5	0	0	0	0	0	0	0	0	0	0	0	0	0	0	1	0	2	7-14 marzo		1	2	3	4	5	6	7	8	9	10	11	12	13	0	15	0	0	0	0	0	21	0	0	24	25	26
1800	0	61	5	5	1	0	3	0	0	6	0	0	0	10	0	0	0	0	1	0	2	24 febbraio - 1 marzo		1	2	3	4	5	6	0	0	9	0	11	12	13	0	0	16	0	0	0	0	21	22	0	24	25	26
2244	1	54	5	5	0	0	0	0	0	0	0	0	0	0	0	0	0	0	1	0	2	dopo il 14 marzo		1	2	3	4	5	6	0	0	9	10	0	12	13	0	0	16	0	0	0	0	21	0	0	24	25	26
1160	1	27	5	5	0	0	0	0	0	0	0	0	0	0	0	0	0	0	1	0	2	2-6 marzo		1	2	3	4	5	6	0	0	9	10	0	12	0	0	0	16	0	0	0	0	21	22	0	0	25	26
2141	0	47	5	5	0	0	0	0	0	0	0	0	0	0	0	0	0	0	1	0	2	7-14 marzo		1	2	3	4	5	0	0	0	9	10	0	12	13	14	15	0	0	0	0	0	0	0	0	24	25	26
2107	0	56	5	6	0	0	0	0	0	0	0	0	0	0	0	0	0	0	1	0	2	dopo il 14 marzo		1	2	3	4	5	6	7	8	9	10	11	12	13	14	15	16	0	0	0	0	21	22	0	0	25	26
1387	0	25	2	2	0	0	0	0	0	0	0	0	0	0	0	0	0	0	1	0	2	24 febbraio - 1 marzo		1	2	3	4	5	6	0	0	9	10	11	12	13	14	0	16	0	0	0	0	21	22	0	0	0	26
3491	0	45	2	2	0	0	0	0	0	0	0	0	0	0	0	0	0	0	1	0	2	7-14 marzo		1	2	3	4	0	6	0	0	9	10	0	12	13	0	0	16	0	0	0	0	21	0	0	24	25	26
1499	0	56	2	2	0	0	0	0	0	0	0	0	0	0	0	0	0	0	1	0	2	7-14 marzo		1	2	0	4	5	6	0	8	9	10	0	12	13	14	0	0	0	0	19	0	21	22	0	24	25	26
1451	0	59	2	2	0	0	0	0	0	0	0	0	0	0	0	0	0	0	1	0	2	7-14 marzo		1	2	3	4	5	6	0	8	0	0	11	12	13	14	0	0	0	0	19	0	21	0	0	24	25	26
1491	0	63	2	2	0	0	0	0	0	0	0	0	0	0	0	0	0	0	1	0	2	24 febbraio - 1 marzo		1	2	3	4	0	6	0	0	9	10	0	12	13	0	0	16	0	0	19	0	21	0	0	24	25	26
713	1	62	2	2	0	0	0	0	0	0	0	0	0	0	0	0	0	0	1	0	2	24 febbraio - 1 marzo		0	0	0	0	0	0	0	0	0	0	0	0	0	0	0	0	0	0	0	0	0	0	0	0	0	0
1508	0	27	2	1	0	0	0	0	0	0	0	0	0	0	0	0	0	0	1	0	2	7-14 marzo		1	2	3	0	5	6	0	0	9	0	0	12	0	14	0	0	0	0	0	0	21	0	23	0	0	0
651	0	51	2	2	0	0	0	0	0	0	0	0	0	0	0	0	0	0	1	0	2	24 febbraio - 1 marzo		1	2	3	4	5	6	7	0	9	10	0	12	13	14	0	0	0	0	0	0	21	0	0	24	25	26
1265	0	52	2	2	1	2	0	0	0	0	7	0	0	10	0	12	13	0	1	0	2	2-6 marzo		1	2	0	4	5	6	0	0	9	10	11	12	13	14	15	0	0	0	0	0	21	0	0	24	25	0
1510	0	34	2	2	0	0	0	0	0	0	0	0	0	0	0	0	0	0	1	0	2	7-14 marzo		1	2	0	4	5	6	0	0	9	10	11	12	13	14	15	16	0	0	0	0	21	22	0	0	25	26
1119	0	60	2	2	0	0	0	0	0	0	0	0	0	0	0	0	0	0	1	0	2	2-6 marzo		1	2	0	0	0	6	0	0	9	10	11	12	13	14	15	0	0	0	0	0	21	22	0	0	25	26
1522	0	33	2	2	0	0	0	0	0	0	0	0	0	0	0	0	0	0	1	0	2	2-6 marzo		1	2	3	0	5	0	0	0	9	0	0	12	0	14	0	16	0	0	0	0	21	22	0	24	25	0
847	0	58	2	2	0	0	0	0	0	0	0	0	0	0	0	0	0	0	1	0	2	21-23 febbraio		1	0	3	4	5	6	0	0	9	0	0	0	13	14	0	16	0	0	0	0	21	0	0	24	25	0
2277	1	56	2	2	0	0	0	0	0	0	0	0	0	0	0	0	0	0	1	0	2	7-14 marzo		1	2	3	4	5	6	0	0	9	10	0	12	13	0	0	0	0	18	0	0	21	22	0	24	25	26
1147	0	56	2	2	0	0	0	0	0	0	0	0	0	0	0	0	0	0	1	0	2	2-6 marzo		1	2	3	4	5	6	7	0	9	0	11	12	13	14	0	0	0	18	0	0	21	0	0	24	25	26
1695	1	39	2	1	0	0	0	0	0	0	0	0	0	0	0	0	0	0	1	0	2	7-14 marzo		1	2	3	4	5	6	7	8	9	10	0	12	13	14	0	16	0	0	19	0	21	22	0	24	25	26
19	0	44	2	5	0	0	0	0	0	0	0	0	0	0	0	0	0	0	1	0	2	7-14 marzo		1	2	3	4	5	6	0	0	9	10	11	12	13	14	0	16	0	0	0	0	21	0	23	0	25	26
2511	1	25	2	12	0	0	0	0	0	0	0	0	0	0	0	0	0	0	1	0	2	21-23 febbraio		1	2	3	4	5	6	0	8	0	10	11	12	13	14	0	16	0	0	0	20	21	0	0	24	25	26
1292	0	50	2	2	0	0	0	0	0	0	0	0	0	0	0	0	0	0	1	0	2	dopo il 14 marzo		1	2	3	4	5	6	7	8	9	0	0	12	13	14	0	0	0	18	0	0	21	0	0	24	25	26
874	0	58	2	2	0	0	0	0	0	0	0	0	0	0	0	0	0	0	1	0	2	7-14 marzo		1	0	0	0	0	6	0	0	0	0	0	12	13	0	0	16	0	0	0	0	0	0	0	24	25	26
3088	1	43	2	2	0	0	0	0	0	0	0	0	0	0	0	0	0	0	1	0	2	2-6 marzo		1	2	3	4	5	6	7	0	9	10	0	12	13	14	0	16	0	0	0	0	21	22	0	24	25	26
926	0	67	2	2	1	0	0	0	0	0	0	0	0	0	0	0	0	0	1	0	2	7-14 marzo		1	2	0	4	5	0	0	0	9	10	11	12	13	0	15	16	0	0	0	0	21	22	0	24	25	26
1154	0	48	2	2	1	0	3	0	0	6	0	0	9	0	0	0	0	0	1	0	2	7-14 marzo		1	2	3	4	5	6	0	0	9	10	0	12	13	0	0	16	0	0	0	0	21	22	0	0	25	26
1066	0	35	2	2	0	0	0	0	0	0	0	0	0	0	0	0	0	0	1	0	2	24 febbraio - 1 marzo		1	2	3	4	5	6	0	8	9	0	11	12	13	14	0	0	0	0	0	0	0	22	0	0	25	26
1018	0	35	2	2	0	0	0	0	0	0	0	0	0	0	0	0	0	0	1	0	2	7-14 marzo		0	2	0	4	5	6	0	0	0	0	0	12	13	14	0	0	0	18	0	0	21	22	0	24	0	0
994	0	31	2	2	0	0	0	0	0	0	0	0	0	0	0	0	0	0	1	0	2	7-14 marzo		1	2	3	4	5	6	7	8	9	0	11	12	13	14	0	0	0	0	0	0	21	22	0	24	25	26
312	1	41	2	2	0	0	0	0	0	0	0	0	0	0	0	0	0	0	1	0	2	24 febbraio - 1 marzo		1	2	0	4	5	6	0	8	9	10	0	0	13	14	0	16	0	0	0	0	21	22	0	24	25	0
589	0	42	2	2	0	0	0	0	0	0	0	0	0	0	0	0	0	0	1	0	2	7-14 marzo		1	2	0	4	0	6	7	0	9	10	0	12	13	0	0	16	17	0	0	0	21	0	23	24	25	0
12	0	43	2	2	0	0	0	0	0	0	0	0	0	0	0	0	0	0	1	0	2	7-14 marzo		1	0	0	0	0	0	0	0	0	0	0	0	0	0	0	0	0	0	0	0	0	0	0	0	0	0
1037	0	44	2	2	0	0	0	0	0	0	0	0	0	0	0	0	0	0	1	0	2	2-6 marzo		1	2	3	4	5	6	7	8	9	10	11	12	13	14	0	0	17	0	0	0	21	22	23	0	25	26
919	0	53	2	2	0	0	0	0	0	0	0	0	0	0	0	0	0	0	1	0	2	7-14 marzo		1	2	3	4	5	6	0	0	9	10	0	12	13	14	0	0	0	0	0	0	21	0	0	24	25	26
490	1	62	2	2	0	0	0	0	0	0	0	0	0	0	0	0	0	0	1	0	2	2-6 marzo		0	2	3	0	0	6	0	0	9	10	0	12	13	0	15	0	0	0	0	0	0	22	0	0	25	26
960	0	63	2	2	0	0	0	0	0	0	0	0	0	0	0	0	0	0	1	0	2	2-6 marzo		1	2	3	4	5	6	7	8	9	10	11	12	13	14	0	16	0	0	19	0	21	22	0	24	25	26
969	1	64	2	2	0	0	0	0	0	0	0	0	0	0	0	0	0	0	1	0	2	21-23 febbraio		1	0	0	4	5	0	0	0	9	0	0	12	13	14	0	0	0	0	0	0	21	22	23	0	25	26
1521	0	66	2	2	0	0	0	0	0	0	0	0	0	0	0	0	0	0	1	0	2	7-14 marzo		1	0	0	0	0	0	0	0	0	0	0	0	0	0	0	0	0	0	0	0	0	0	0	0	0	0
434	0	71	2	2	0	0	0	0	0	0	0	0	0	0	0	0	0	0	1	0	2	2-6 marzo		1	2	3	4	5	6	0	0	9	10	0	12	13	14	15	16	17	0	0	0	21	22	23	0	25	26
588	0	39	2	2	1	0	0	4	0	6	0	0	9	10	11	12	13	0	1	0	2	24 febbraio - 1 marzo		1	2	3	4	5	6	7	8	9	10	11	12	13	0	0	16	0	0	0	0	21	0	0	24	25	26
222	1	58	2	2	1	2	3	4	0	6	7	0	0	0	0	0	0	0	1	0	2	21-23 febbraio		1	2	3	4	5	6	0	0	9	0	11	12	0	14	0	0	0	18	0	0	21	0	0	24	25	26
2494	0	56	11	11	0	0	0	0	0	0	0	0	0	0	0	0	0	0	1	0	2	21-23 febbraio		1	2	0	4	5	6	0	0	9	10	0	12	13	14	15	16	0	0	0	0	21	22	0	24	25	0
1566	1	37	11	11	0	0	0	0	0	0	0	0	0	0	0	0	0	0	1	0	2	7-14 marzo		1	2	3	4	5	0	0	0	0	0	0	12	13	0	15	16	0	0	0	0	21	0	0	24	25	26
1593	0	54	11	6	0	0	0	0	0	0	0	0	0	0	0	0	0	0	1	0	2	24 febbraio - 1 marzo		1	2	0	4	5	6	0	0	9	10	0	12	13	0	0	16	0	0	0	0	21	22	0	0	25	26
2089	0	32	11	11	0	0	0	0	0	0	0	0	0	0	0	0	0	0	1	0	2	24 febbraio - 1 marzo		1	2	0	4	5	6	0	8	9	10	11	12	13	14	0	0	17	0	0	0	21	22	0	0	25	26
1799	1	51	11	11	0	0	0	0	0	0	0	0	0	0	0	0	0	0	1	0	2	24 febbraio - 1 marzo		1	2	3	4	5	6	0	0	0	0	0	12	13	14	0	0	0	0	0	0	21	0	0	0	25	26
3811	0	27	11	6	0	0	0	0	0	0	0	0	0	0	0	0	0	0	1	0	2	dopo il 14 marzo		1	2	0	4	5	6	7	8	9	10	0	12	0	14	0	16	0	0	0	0	0	22	0	0	25	26
144	0	26	11	11	0	0	0	0	0	0	0	0	0	0	0	0	0	0	1	0	2	7-14 marzo		1	2	3	4	5	6	7	8	9	10	11	12	13	0	0	0	0	0	0	0	21	22	0	0	25	26
2847	0	55	11	11	0	0	0	0	0	0	0	0	0	0	0	0	0	0	1	0	2	24 febbraio - 1 marzo		1	2	3	4	5	6	7	8	9	10	11	12	13	14	15	0	0	0	0	0	21	0	0	24	25	26
3239	0	63	11	11	0	0	0	0	0	0	0	0	0	0	0	0	0	0	1	0	2	21-23 febbraio		0	2	0	4	5	6	7	0	0	0	0	12	13	0	0	16	0	0	0	0	21	22	0	0	25	26
603	0	57	11	1	0	0	0	0	0	0	0	0	0	0	0	0	0	0	1	0	2	21-23 febbraio		1	2	3	4	5	6	7	8	9	10	11	12	13	14	15	0	0	0	0	0	21	0	0	24	25	26
2997	0	51	11	11	0	0	0	0	0	0	0	0	0	0	0	0	0	0	1	0	2	21-23 febbraio		1	2	3	4	5	6	0	0	9	10	11	12	13	14	15	16	0	0	0	0	21	0	0	24	25	26
2838	0	58	11	11	0	0	0	0	0	0	0	0	0	0	0	0	0	0	1	0	2	21-23 febbraio		1	0	0	0	5	6	7	0	9	0	0	0	13	0	15	0	0	0	0	0	0	22	0	0	25	26
2635	0	36	11	13	0	0	0	0	0	0	0	0	0	0	0	0	0	0	1	0	2	24 febbraio - 1 marzo		1	2	3	4	5	6	0	0	0	0	0	12	13	0	0	16	0	0	0	0	21	0	0	24	25	0
1342	0	27	11	11	0	0	0	0	0	0	0	0	0	0	0	0	0	0	1	0	2	24 febbraio - 1 marzo		1	2	3	0	5	6	7	8	9	10	0	12	13	14	0	16	0	0	0	0	0	22	0	0	25	26
1553	0	50	11	11	0	0	0	0	0	0	0	0	0	0	0	0	0	0	1	0	2	21-23 febbraio		1	2	3	4	5	6	7	8	9	10	11	12	13	14	15	0	0	0	0	0	21	22	0	0	25	26
783	0	57	11	11	0	0	0	0	0	0	0	0	0	0	0	0	0	0	1	0	2	2-6 marzo		1	2	3	4	5	6	7	8	9	10	11	12	13	14	15	0	0	0	0	0	21	0	0	24	25	26
2624	0	71	11	11	0	0	0	0	0	0	0	0	0	0	0	0	0	0	1	0	2	21-23 febbraio		1	2	3	4	5	6	7	8	9	10	11	12	13	14	15	16	0	0	0	0	0	22	0	0	25	26
2124	0	41	11	11	1	0	0	0	0	0	0	0	0	0	0	0	0	0	1	0	2	dopo il 14 marzo		1	2	0	4	5	0	0	0	9	0	11	12	13	14	0	16	0	0	0	0	21	0	0	24	25	26
2619	1	40	11	11	0	0	0	0	0	0	0	0	0	0	0	0	0	0	1	0	2	24 febbraio - 1 marzo		0	2	3	4	5	0	0	0	9	0	0	12	13	14	0	16	0	0	0	0	21	0	0	24	25	26
1837	0	40	11	11	0	0	0	0	0	0	0	0	0	0	0	0	0	0	1	0	2	2-6 marzo		1	2	3	4	5	6	0	0	9	10	11	12	13	14	0	16	0	0	0	0	21	0	0	24	25	26
642	1	52	11	11	0	0	0	0	0	0	0	0	0	0	0	0	0	0	1	0	2	24 febbraio - 1 marzo		1	2	3	4	5	6	0	0	9	0	11	12	13	14	0	16	0	0	0	0	21	22	0	24	25	26
3645	0	60	11	1	0	0	0	0	0	0	0	0	0	0	0	0	0	0	1	0	2	7-14 marzo		1	2	3	4	5	6	0	0	9	10	0	12	13	14	0	0	0	0	0	20	21	0	0	24	25	26
1644	0	63	11	1	0	0	0	0	0	0	0	0	0	0	0	0	0	0	1	0	2	7-14 marzo		1	2	3	4	5	6	0	0	9	10	0	12	13	0	0	0	0	0	0	0	21	0	0	24	25	26
1643	1	66	11	1	0	0	0	0	0	0	0	0	0	0	0	0	0	0	1	0	2	7-14 marzo		1	2	3	4	5	6	0	0	9	10	0	12	13	0	0	0	0	0	0	0	21	0	0	24	25	26
521	0	46	11	2	0	0	0	0	0	0	0	0	0	0	0	0	0	0	1	0	2	2-6 marzo		1	2	3	4	5	6	0	0	9	10	11	12	13	14	15	16	17	0	0	0	21	22	0	0	25	26
3230	0	38	11	11	0	0	0	0	0	0	0	0	0	0	0	0	0	0	1	0	2	7-14 marzo		1	0	0	4	5	6	7	0	9	10	11	12	13	14	0	0	0	0	0	0	0	22	0	0	25	26
3443	0	40	11	11	0	0	0	0	0	0	0	0	0	0	0	0	0	0	1	0	2	21-23 febbraio		1	2	3	4	5	6	0	0	9	0	0	12	13	14	0	16	0	0	0	0	0	0	0	0	0	0
2545	0	53	11	11	0	0	0	0	0	0	0	0	0	0	0	0	0	0	1	0	2	24 febbraio - 1 marzo		1	2	0	4	5	0	0	0	0	10	0	12	13	14	0	0	0	0	0	0	21	0	0	24	25	0
3024	1	26	11	11	0	0	0	0	0	0	0	0	0	0	0	0	0	0	1	0	2	7-14 marzo		1	2	3	0	5	0	0	0	9	10	11	12	13	14	0	0	17	0	0	0	21	0	0	24	25	26
891	1	27	11	11	0	0	0	0	0	0	0	0	0	0	0	0	0	0	1	0	2	2-6 marzo		1	2	3	4	5	6	0	0	9	10	11	12	13	14	0	16	0	0	0	0	21	22	23	24	25	26
2871	0	28	11	11	0	0	0	0	0	0	0	0	0	0	0	0	0	0	1	0	2	7-14 marzo		1	2	3	4	5	6	0	0	9	10	11	12	13	14	0	16	0	0	0	0	21	22	0	24	25	26
1872	1	30	11	11	0	0	0	0	0	0	0	0	0	0	0	0	0	0	1	0	2	24 febbraio - 1 marzo		1	2	3	4	5	0	0	0	0	10	11	12	13	0	0	0	0	0	0	0	21	0	0	24	25	26
1674	1	32	11	11	0	0	0	0	0	0	0	0	0	0	0	0	0	0	1	0	2	7-14 marzo		1	2	0	4	5	6	0	0	9	10	0	12	13	14	0	16	0	0	0	0	21	0	0	24	25	26
2824	0	41	11	11	0	0	0	0	0	0	0	0	0	0	0	0	0	0	1	0	2	2-6 marzo		1	2	3	4	5	6	0	0	0	10	0	12	13	0	15	0	0	0	0	0	21	22	0	0	25	26
1718	0	47	11	11	0	0	0	0	0	0	0	0	0	0	0	0	0	0	1	0	2	21-23 febbraio		1	0	3	4	5	6	7	8	9	0	11	12	13	14	0	16	0	0	0	0	21	22	0	0	25	26
2743	1	48	11	11	0	0	0	0	0	0	0	0	0	0	0	0	0	0	1	0	2	7-14 marzo		1	2	3	4	5	6	0	0	9	10	0	12	13	0	0	0	0	0	0	0	21	22	0	0	25	0
1616	0	49	11	11	0	0	0	0	0	0	0	0	0	0	0	0	0	0	1	0	2	7-14 marzo		1	2	3	4	5	6	0	0	0	10	0	12	13	14	0	0	0	0	0	0	21	22	0	0	25	26
2617	0	50	11	11	0	0	0	0	0	0	0	0	0	0	0	0	0	0	1	0	2	21-23 febbraio		1	0	3	4	5	6	0	0	9	10	0	12	13	14	0	16	0	0	0	0	21	22	0	0	25	26
3112	0	67	11	11	0	0	0	0	0	0	0	0	0	0	0	0	0	0	1	0	2	7-14 marzo		0	2	3	0	0	6	0	0	0	0	0	0	0	0	0	16	0	0	0	0	0	0	0	24	25	0
1542	1	44	9	1	0	0	0	0	0	0	0	0	0	0	0	0	0	0	1	0	2	21-23 febbraio		1	2	3	4	5	6	0	0	9	10	0	12	13	14	0	16	17	18	0	0	21	22	0	24	25	26
623	0	30	9	9	0	0	0	0	0	0	0	0	0	0	0	0	0	0	1	0	2	24 febbraio - 1 marzo		0	2	0	4	5	6	0	0	9	10	0	12	13	14	0	16	0	0	0	0	21	0	0	24	25	26
1250	1	49	9	9	0	0	0	0	0	0	0	0	0	0	0	0	0	0	1	0	2	7-14 marzo		1	2	3	4	5	6	7	8	9	10	11	12	13	14	0	0	17	0	0	0	0	0	0	24	25	26
1736	0	62	9	9	0	0	0	0	0	0	0	0	0	0	0	0	0	0	1	0	2	dopo il 14 marzo		0	2	0	4	5	6	0	0	0	0	11	12	13	14	15	16	0	0	0	0	21	22	0	24	25	26
2467	0	56	9	9	0	0	0	0	0	0	0	0	0	0	0	0	0	0	1	0	2	7-14 marzo		1	2	3	4	5	6	0	0	9	10	11	12	13	14	15	0	0	0	0	0	21	0	0	24	25	26
3221	0	56	9	9	0	0	0	0	0	0	0	0	0	0	0	0	0	0	1	0	2	7-14 marzo		0	2	0	4	5	6	0	0	0	10	0	12	13	0	0	16	0	0	0	0	21	0	0	24	25	26
3824	1	50	9	9	0	0	0	0	0	0	0	0	0	0	0	0	0	0	1	0	2	2-6 marzo		1	2	3	4	5	6	0	8	9	10	0	12	13	14	15	0	0	0	0	0	21	22	0	24	25	26
507	0	60	9	9	0	0	0	0	0	0	0	0	0	0	0	0	0	0	1	0	2	7-14 marzo		1	2	3	4	5	6	0	8	9	10	11	12	13	14	0	16	0	0	0	0	21	22	0	24	25	26
1824	0	63	9	9	0	0	0	0	0	0	0	0	0	0	0	0	0	0	1	0	2	24 febbraio - 1 marzo		1	2	3	4	5	6	0	0	0	10	11	12	13	14	0	16	0	0	0	0	21	0	0	24	25	26
1558	0	27	9	1	0	0	0	0	0	0	0	0	0	0	0	0	0	0	1	0	2	2-6 marzo		1	2	3	4	5	6	0	0	9	10	11	12	13	14	15	0	0	0	0	0	21	22	0	24	25	26
3555	0	54	9	9	0	0	0	0	0	0	0	0	0	0	0	0	0	0	1	0	2	2-6 marzo		1	2	0	4	5	6	0	0	9	10	11	12	13	14	0	0	0	18	0	0	21	22	0	24	25	0
2491	1	37	9	9	0	0	0	0	0	0	0	0	0	0	0	0	0	0	1	0	2	7-14 marzo		1	2	3	4	5	6	0	0	9	10	0	12	13	14	15	16	0	0	0	0	21	0	0	24	25	26
587	0	45	9	9	0	0	0	0	0	0	0	0	0	0	0	0	0	0	1	0	2	24 febbraio - 1 marzo		1	2	3	4	5	6	7	8	9	10	11	12	13	14	0	0	0	18	0	0	21	22	23	0	25	26
2548	0	46	9	9	0	0	0	0	0	0	0	0	0	0	0	0	0	0	1	0	2	7-14 marzo		1	2	0	4	5	6	0	0	9	0	0	12	13	14	0	0	0	0	0	0	21	0	0	24	25	0
1640	0	48	9	9	0	0	0	0	0	0	0	0	0	0	0	0	0	0	1	0	2	dopo il 14 marzo		1	0	3	4	0	0	0	0	9	0	0	12	13	14	0	0	0	0	0	0	0	0	0	24	25	0
2040	1	59	9	9	0	0	0	0	0	0	0	0	0	0	0	0	0	0	1	0	2	2-6 marzo		1	2	3	4	5	6	7	8	9	10	11	12	13	14	15	16	0	0	0	0	21	22	23	0	25	26
2615	0	60	9	9	0	0	0	0	0	0	0	0	0	0	0	0	0	0	1	0	2	dopo il 14 marzo		0	2	0	4	5	0	0	0	9	10	0	12	13	14	0	16	0	0	0	0	0	22	0	0	25	26
788	0	61	9	9	0	0	0	0	0	0	0	0	0	0	0	0	0	0	1	0	2	24 febbraio - 1 marzo		1	2	0	0	0	6	0	0	0	0	0	12	0	14	0	0	0	0	0	0	0	0	0	24	0	0
2642	0	62	9	9	0	0	0	0	0	0	0	0	0	0	0	0	0	0	1	0	2	7-14 marzo		1	2	3	4	5	6	0	0	9	10	0	12	13	14	0	16	0	0	0	0	0	22	0	24	25	26
2173	0	63	9	9	0	0	0	0	0	0	0	0	0	0	0	0	0	0	1	0	2	2-6 marzo		1	2	3	0	5	6	0	0	0	10	0	12	13	0	0	16	0	0	0	0	21	0	0	0	25	26
3260	0	56	9	9	0	0	0	0	0	0	0	0	0	0	0	0	0	0	1	0	2	2-6 marzo		1	2	3	4	5	6	0	0	9	10	11	12	13	14	15	0	0	0	0	0	21	0	0	24	25	26
2175	1	35	9	9	0	0	0	0	0	0	0	0	0	0	0	0	0	0	1	0	2	21-23 febbraio		1	2	3	4	5	6	0	0	9	0	0	12	13	0	0	16	0	0	0	0	21	22	0	0	25	26
1073	0	61	9	9	0	0	0	0	0	0	0	0	0	0	0	0	0	0	1	0	2	7-14 marzo		1	2	0	0	0	0	7	0	0	10	0	12	0	14	0	0	0	0	0	0	21	22	0	0	25	26
877	0	39	9	9	1	0	0	0	0	0	0	0	9	0	0	0	0	0	1	0	2	7-14 marzo		1	2	3	4	5	6	7	0	9	0	11	12	13	0	15	0	0	0	0	0	21	22	0	24	25	26
2180	0	63	9	9	0	0	0	0	0	0	0	0	0	0	0	0	0	0	1	0	2	7-14 marzo		0	2	3	4	5	0	0	0	0	0	0	12	13	14	0	0	0	0	0	0	21	22	0	0	25	26
544	0	68	9	9	0	0	0	0	0	0	0	0	0	0	0	0	0	0	1	0	2	24 febbraio - 1 marzo		0	2	0	4	5	6	7	8	0	10	0	12	13	0	0	16	0	0	0	0	0	22	0	0	25	26
315	0	33	9	9	0	0	0	0	0	0	0	0	0	0	0	0	0	0	1	0	2	2-6 marzo		0	0	0	0	0	0	0	0	0	0	0	0	0	0	0	0	0	0	0	0	0	0	0	0	0	0
2927	1	53	9	9	0	0	0	0	0	0	0	0	0	0	0	0	0	0	1	0	2	7-14 marzo		0	2	0	4	5	6	0	0	9	0	0	12	13	14	15	16	0	0	0	0	21	22	0	0	25	26
3340	0	57	9	9	0	0	0	0	0	0	0	0	0	0	0	0	0	0	1	0	2	7-14 marzo		1	2	3	4	5	6	0	0	9	10	0	12	13	14	15	0	0	0	0	0	21	0	0	24	25	26
3080	0	49	9	9	0	0	0	0	0	0	0	0	0	0	0	0	0	0	1	0	2	7-14 marzo		1	2	0	4	5	6	0	0	9	10	11	12	13	14	15	16	0	0	0	0	21	0	23	24	25	26
1203	0	68	9	1	0	0	0	0	0	0	0	0	0	0	0	0	0	0	1	0	2	7-14 marzo		1	2	3	4	5	6	0	0	9	10	0	0	13	14	0	16	0	0	0	0	0	0	0	24	25	26
156	0	32	9	1	0	0	0	0	0	0	0	0	0	0	0	0	0	0	1	0	2	2-6 marzo		1	2	3	4	5	6	0	0	9	10	0	12	13	14	0	16	0	0	0	0	21	0	0	24	25	26
2709	1	31	9	9	0	0	0	0	0	0	0	0	0	0	0	0	0	0	1	0	2	7-14 marzo		1	2	3	4	5	6	0	0	9	10	0	0	13	14	15	0	0	0	0	0	0	0	0	24	25	26
3719	1	44	9	9	0	0	0	0	0	0	0	0	0	0	0	0	0	0	1	0	2	2-6 marzo		1	2	3	4	5	6	0	0	9	10	11	12	13	14	0	16	0	0	0	0	21	22	23	0	25	26
3705	0	37	9	9	1	0	3	4	0	6	7	8	9	10	11	0	0	14	1	0	2	2-6 marzo		1	2	3	4	5	6	0	8	9	10	0	12	13	14	0	16	0	0	0	0	21	0	0	24	25	26
184	0	71	9	9	0	0	0	0	0	0	0	0	0	0	0	0	0	0	1	0	2	2-6 marzo		0	2	3	4	5	6	0	0	9	10	0	12	13	0	15	16	0	0	0	0	21	0	23	0	0	26
1981	0	40	9	9	1	0	3	0	0	6	0	0	9	0	11	0	0	0	1	0	2	2-6 marzo		1	2	0	0	0	0	0	0	0	0	0	12	13	14	0	0	0	0	0	0	21	0	0	24	25	0
2295	0	25	9	9	0	0	0	0	0	0	0	0	0	0	0	0	0	0	1	0	2	2-6 marzo		1	2	3	4	5	6	7	8	9	10	11	12	13	14	0	16	0	0	0	20	21	22	23	0	25	26
2945	0	29	9	9	0	0	0	0	0	0	0	0	0	0	0	0	0	0	1	0	2	2-6 marzo		1	2	3	4	5	6	0	0	9	10	11	12	13	14	0	16	0	0	0	0	21	0	0	24	25	26
159	1	29	9	9	0	0	0	0	0	0	0	0	0	0	0	0	0	0	1	0	2	7-14 marzo		0	0	0	0	0	0	0	0	0	0	0	0	0	0	0	0	0	0	0	0	0	0	0	0	0	0
2151	0	39	9	9	0	0	0	0	0	0	0	0	0	0	0	0	0	0	1	0	2	7-14 marzo		1	2	0	4	5	0	0	0	0	0	0	12	13	0	0	0	0	0	0	0	21	0	0	24	25	26
461	0	44	9	9	0	0	0	0	0	0	0	0	0	0	0	0	0	0	1	0	2	21-23 febbraio		1	2	3	4	5	6	7	8	9	10	11	12	13	14	15	0	0	0	0	0	21	0	0	24	25	26
1596	0	46	9	9	0	0	0	0	0	0	0	0	0	0	0	0	0	0	1	0	2	21-23 febbraio		1	2	0	0	5	6	0	0	0	0	0	12	0	0	0	0	0	0	0	0	21	0	23	0	25	26
1411	0	56	9	9	0	0	0	0	0	0	0	0	0	0	0	0	0	0	1	0	2	2-6 marzo		1	2	3	4	5	6	0	0	9	10	0	12	13	14	0	16	0	0	0	0	21	0	0	24	25	26
3612	0	61	9	9	0	0	0	0	0	0	0	0	0	0	0	0	0	0	1	0	2	2-6 marzo		1	2	3	4	5	6	7	8	9	10	11	12	13	14	15	0	17	0	0	0	21	22	0	24	25	26
3729	0	63	9	9	0	0	0	0	0	0	0	0	0	0	0	0	0	0	1	0	2	21-23 febbraio		1	2	0	4	5	6	0	0	9	10	0	12	13	0	0	16	0	0	0	0	21	22	0	0	25	26
2947	0	64	9	9	0	0	0	0	0	0	0	0	0	0	0	0	0	0	1	0	2	2-6 marzo		1	2	3	4	5	6	0	0	9	10	11	12	13	0	0	16	0	0	0	0	21	0	0	24	25	26
3766	0	65	9	9	0	0	0	0	0	0	0	0	0	0	0	0	0	0	1	0	2	24 febbraio - 1 marzo		0	0	0	0	0	0	0	0	0	0	0	0	0	0	0	0	0	0	0	0	0	0	0	0	0	0
3223	0	40	9	9	1	2	3	4	5	6	7	0	0	10	11	12	0	0	1	0	2	2-6 marzo		1	2	3	4	5	0	0	0	0	10	0	12	0	14	0	0	0	0	0	0	21	0	0	24	25	26
905	0	33	9	1	0	0	0	0	0	0	0	0	0	0	0	0	0	0	1	0	2	2-6 marzo		1	2	3	4	5	6	7	8	9	10	0	12	13	14	15	0	0	0	0	0	21	0	0	24	25	26
2240	0	40	9	1	0	0	0	0	0	0	0	0	0	0	0	0	0	0	1	0	2	7-14 marzo		1	0	3	4	5	6	0	8	9	0	11	12	13	14	15	16	0	0	0	0	21	0	23	24	25	26
2789	0	37	9	8	0	0	0	0	0	0	0	0	0	0	0	0	0	0	1	0	2	7-14 marzo		1	2	0	4	5	6	0	0	9	10	11	12	13	0	0	16	0	0	0	0	0	0	0	24	25	26
122	1	51	9	9	0	0	0	0	0	0	0	0	0	0	0	0	0	0	1	0	2	dopo il 14 marzo		1	0	0	4	5	6	0	0	9	10	11	12	13	14	15	0	0	0	0	0	21	22	0	0	25	26
3201	0	35	9	9	0	0	0	0	0	0	0	0	0	0	0	0	0	0	1	0	2	21-23 febbraio		1	2	3	4	5	6	7	0	9	0	0	12	13	14	15	16	0	0	0	0	21	0	0	24	25	26
2228	0	70	9	9	0	0	0	0	0	0	0	0	0	0	0	0	0	0	1	0	2	21-23 febbraio		1	2	3	4	5	6	7	8	9	10	0	12	13	0	0	0	0	0	0	0	21	22	0	0	25	26
2116	0	65	9	9	0	0	0	0	0	0	0	0	0	0	0	0	0	0	1	0	2	7-14 marzo		0	0	0	0	0	0	0	0	0	0	0	0	0	0	0	0	0	0	0	0	0	0	0	0	0	0
132	0	69	9	9	0	0	0	0	0	0	0	0	0	0	0	0	0	0	1	0	2	2-6 marzo		1	2	3	4	5	6	7	8	0	10	0	12	13	14	0	16	0	0	0	0	0	22	0	24	25	26
2371	0	69	9	9	0	0	0	0	0	0	0	0	0	0	0	0	0	0	1	0	2	dopo il 14 marzo		1	2	3	4	5	6	0	0	9	10	0	12	13	14	0	0	0	0	0	0	21	0	0	24	25	26
673	0	48	9	9	0	0	0	0	0	0	0	0	0	0	0	0	0	0	1	0	2	24 febbraio - 1 marzo		1	2	3	4	5	6	7	8	9	10	0	12	13	14	0	16	0	0	0	0	21	0	0	24	25	26
2648	0	43	9	9	0	0	0	0	0	0	0	0	0	0	0	0	0	0	1	0	2	21-23 febbraio		0	0	0	0	0	0	0	0	0	0	0	0	0	0	0	0	0	0	0	0	0	0	0	0	0	0
54	1	45	9	13	0	0	0	0	0	0	0	0	0	0	0	0	0	0	1	0	2	7-14 marzo		0	2	0	4	5	0	0	0	0	0	0	0	0	0	0	0	0	0	0	0	21	22	23	0	25	26
1625	1	49	9	13	0	0	0	0	0	0	0	0	0	0	0	0	0	0	1	0	2	21-23 febbraio		0	0	0	0	0	0	0	0	0	0	0	0	0	0	0	0	0	0	0	0	0	0	0	0	0	0
3727	1	40	13	4	0	0	0	0	0	0	0	0	0	0	0	0	0	0	1	0	2	7-14 marzo		1	2	0	4	5	6	0	0	9	10	0	12	13	14	0	0	0	0	19	0	21	0	0	24	25	26
2519	0	50	13	9	0	0	0	0	0	0	0	0	0	0	0	0	0	0	1	0	2	7-14 marzo		1	2	0	4	5	6	0	0	9	0	0	12	13	14	0	0	17	0	0	0	21	0	0	24	25	26
936	1	27	13	13	0	0	0	0	0	0	0	0	0	0	0	0	0	0	1	0	2	21-23 febbraio		1	2	0	4	5	6	0	0	9	0	0	12	0	0	0	0	0	0	0	0	21	22	0	0	25	0
782	0	37	13	13	0	0	0	0	0	0	0	0	0	0	0	0	0	0	1	0	2	7-14 marzo		1	2	3	4	5	6	7	8	9	10	11	12	13	14	15	16	17	18	19	20	21	22	23	24	25	26
1509	0	55	13	13	0	0	0	0	0	0	0	0	0	0	0	0	0	0	1	0	2	2-6 marzo		1	2	0	4	5	6	7	0	9	10	0	12	13	14	0	16	0	0	0	0	21	22	0	24	25	26
1951	0	36	13	13	0	0	0	0	0	0	0	0	0	0	0	0	0	0	1	0	2	2-6 marzo		1	2	3	4	5	6	7	0	9	10	0	12	13	14	15	0	0	0	0	0	21	22	0	24	25	26
3395	1	38	13	13	0	0	0	0	0	0	0	0	0	0	0	0	0	0	1	0	2	7-14 marzo		1	2	0	4	5	6	0	0	9	10	11	12	13	0	0	16	0	0	0	0	21	0	0	24	25	26
1716	0	28	13	11	0	0	0	0	0	0	0	0	0	0	0	0	0	0	1	0	2	7-14 marzo		1	2	0	4	5	6	7	0	9	10	0	12	13	14	0	16	0	0	0	0	21	0	0	24	25	26
3283	0	31	13	12	0	0	0	0	0	0	0	0	0	0	0	0	0	0	1	0	2	7-14 marzo		1	2	3	4	5	6	0	0	9	0	11	12	13	14	0	0	17	0	0	0	21	0	23	24	25	26
831	0	57	13	13	0	0	0	0	0	0	0	0	0	0	0	0	0	0	1	0	2	2-6 marzo		1	2	3	4	5	6	0	0	9	10	11	12	13	14	15	0	0	0	0	0	21	22	0	0	25	26
1519	0	40	13	2	0	0	0	0	0	0	0	0	0	0	0	0	0	0	1	0	2	7-14 marzo		1	2	3	4	5	6	0	0	9	10	11	12	13	0	0	16	0	0	0	0	21	0	23	0	25	26
1452	0	29	13	13	0	0	0	0	0	0	0	0	0	0	0	0	0	0	1	0	2	2-6 marzo		1	2	3	4	5	6	0	0	9	10	0	12	13	14	0	16	0	18	0	0	21	0	23	24	25	26
3061	1	43	13	12	0	0	0	0	0	0	0	0	0	0	0	0	0	0	1	0	2	2-6 marzo		0	2	3	4	5	6	0	0	9	10	11	12	13	14	0	16	0	0	0	0	21	0	23	0	25	26
1159	1	37	12	12	0	0	0	0	0	0	0	0	0	0	0	0	0	0	1	0	2	7-14 marzo		1	2	0	4	5	6	0	0	9	10	0	12	13	0	15	16	0	0	0	0	21	22	0	24	25	26
2965	0	62	12	12	0	0	0	0	0	0	0	0	0	0	0	0	0	0	1	0	2	24 febbraio - 1 marzo		1	2	3	4	5	6	0	0	9	10	11	12	13	14	0	16	0	0	0	0	21	0	0	24	25	26
391	0	45	12	12	0	0	0	0	0	0	0	0	0	0	0	0	0	0	1	0	2	2-6 marzo		1	2	0	4	5	0	7	0	9	0	0	12	13	0	0	0	0	0	0	0	21	22	0	0	0	0
1828	0	52	12	12	0	0	0	0	0	0	0	0	0	0	0	0	0	0	1	0	2	7-14 marzo		1	2	3	4	5	6	0	0	9	10	11	12	13	14	0	16	0	0	0	0	21	22	0	0	25	26
2895	0	67	12	12	0	0	0	0	0	0	0	0	0	0	0	0	0	0	1	0	2	7-14 marzo		1	0	3	0	5	0	0	0	9	10	11	12	13	14	0	0	0	0	19	0	21	0	0	24	25	26
3388	0	43	12	13	0	0	0	0	0	0	0	0	0	0	0	0	0	0	1	0	2	dopo il 14 marzo		1	2	3	4	5	0	0	0	9	10	0	12	13	14	0	16	0	0	0	0	0	0	0	24	25	26
2692	0	63	12	12	0	0	0	0	0	0	0	0	0	0	0	0	0	0	1	0	2	24 febbraio - 1 marzo		1	2	3	4	5	6	0	0	9	10	0	12	13	0	15	0	0	0	0	0	21	0	23	24	25	26
497	0	53	12	12	0	0	0	0	0	0	0	0	0	0	0	0	0	0	1	0	2	7-14 marzo		1	2	0	4	5	6	0	0	9	10	0	12	13	14	15	0	0	18	0	0	21	0	0	24	25	26
3540	0	56	12	12	0	0	0	0	0	0	0	0	0	0	0	0	0	0	1	0	2	24 febbraio - 1 marzo		1	2	3	4	5	6	0	0	9	10	11	12	13	14	0	16	0	0	0	0	21	0	0	24	25	26
1099	0	64	12	12	1	0	3	0	0	0	0	0	9	0	0	0	0	0	1	0	2	7-14 marzo		1	2	3	0	0	0	0	0	0	10	11	12	13	0	0	16	0	0	0	20	21	0	0	24	25	26
466	0	67	12	12	0	0	0	0	0	0	0	0	0	0	0	0	0	0	1	0	2	7-14 marzo		0	0	0	0	0	0	0	0	0	0	0	0	0	0	0	0	0	0	0	0	0	0	0	0	0	0
3782	1	28	12	12	0	0	0	0	0	0	0	0	0	0	0	0	0	0	1	0	2	2-6 marzo	2-6 marzo	1	2	3	4	5	6	7	8	9	10	11	12	13	14	15	16	0	0	0	0	21	0	0	24	25	26
3035	0	48	12	12	0	0	0	0	0	0	0	0	0	0	0	0	0	0	1	0	2	7-14 marzo		1	2	0	0	0	0	0	0	0	0	0	0	13	0	0	16	0	0	0	0	0	0	0	24	25	26
2067	0	62	12	12	0	0	0	0	0	0	0	0	0	0	0	0	0	0	1	0	2	24 febbraio - 1 marzo		1	2	3	4	5	6	0	0	9	0	11	12	13	14	0	0	17	0	0	0	21	22	0	0	25	26
1746	0	62	12	12	0	0	0	0	0	0	0	0	0	0	0	0	0	0	1	0	2	24 febbraio - 1 marzo		1	2	3	4	5	6	0	0	9	10	11	12	13	14	0	16	0	0	0	0	21	22	0	24	25	26
1683	0	42	12	13	0	0	0	0	0	0	0	0	0	0	0	0	0	0	1	0	2	2-6 marzo		1	2	3	4	5	6	7	8	9	10	11	12	13	14	15	0	0	0	0	0	21	0	23	0	25	26
3076	0	36	13	3	0	0	0	0	0	0	0	0	0	0	0	0	0	0	1	0	2	7-14 marzo		1	0	0	0	5	6	0	0	9	0	0	0	0	0	15	0	0	0	0	0	0	0	0	0	0	26
3833	0	29	13	13	0	0	0	0	0	0	0	0	0	0	0	0	0	0	1	0	2	2-6 marzo		1	2	3	4	5	6	7	0	9	10	0	12	13	0	0	16	0	0	0	0	0	0	0	24	25	0
1660	0	51	13	6	0	0	0	0	0	0	0	0	0	0	0	0	0	0	1	0	2	2-6 marzo		1	0	0	4	5	6	0	0	9	10	11	12	13	14	15	0	0	0	0	0	21	0	0	24	25	0
3499	0	38	13	1	0	0	0	0	0	0	0	0	0	0	0	0	0	0	1	0	2	2-6 marzo		1	2	3	4	5	6	0	0	9	10	0	12	13	14	0	0	17	0	0	0	21	0	23	0	25	26
2547	0	60	13	4	0	0	0	0	0	0	0	0	0	0	0	0	0	0	1	0	2	21-23 febbraio		0	2	3	4	5	6	0	0	9	10	11	12	13	14	0	16	0	0	19	0	21	22	0	24	25	26
3445	0	47	13	1	0	0	0	0	0	0	0	0	0	0	0	0	0	0	1	0	2	dopo il 14 marzo		1	2	3	4	5	6	7	8	9	10	11	12	13	14	0	0	17	0	0	20	21	0	0	24	25	26
2269	0	55		4	0	0	0	0	0	0	0	0	0	0	0	0	0	0	1	0	2	7-14 marzo		1	2	3	4	0	0	0	0	9	0	0	12	13	0	15	0	0	0	0	0	21	22	0	0	25	26
1657	1	57		5	0	0	0	0	0	0	0	0	0	0	0	0	0	0	1	0	2	7-14 marzo		1	2	3	4	5	6	0	0	9	0	0	12	13	0	0	0	0	0	0	0	21	0	0	24	25	26
3157	0			5		0	0	0	0	0	0	0	0	0	0	0	0	0	1	0	2	2-6 marzo		0	2	3	4	5	6	0	0	0	10	11	12	0	0	0	16	0	0	0	0	21	0	0	24	25	26
1738	0	64		7	0	0	0	0	0	0	0	0	0	0	0	0	0	0	1	0	2	2-6 marzo		1	2	3	0	0	0	0	0	9	0	0	12	13	14	0	0	0	0	0	0	21	22	23	0	25	0
700	0	51			0	0	0	0	0	0	0	0	0	0	0	0	0	0	1	0	2	7-14 marzo		1	2	0	0	5	6	0	0	9	0	0	12	13	14	0	0	0	0	0	0	21	0	0	24	25	26
541	0	53			0	0	0	0	0	0	0	0	0	0	0	0	0	0	1	0	2	7-14 marzo		1	2	0	4	5	6	0	0	9	10	0	12	13	14	0	16	0	0	0	0	21	0	0	24	25	26
1021	0	54			0	0	0	0	0	0	0	0	0	0	0	0	0	0	1	0	2	dopo il 14 marzo		1	2	0	4	5	6	0	0	9	10	0	12	13	14	15	16	0	0	0	0	21	22	0	0	25	26
3155	0	55			0	0	0	0	0	0	0	0	0	0	0	0	0	0	1	0	2	21-23 febbraio		1	2	3	4	5	6	7	8	9	10	11	12	13	14	0	16	0	0	0	0	21	0	0	24	25	26
464	0	57			0	0	0	0	0	0	0	0	0	0	0	0	0	0	1	0	2	7-14 marzo		0	0	0	0	0	0	0	0	0	0	0	0	0	0	0	0	0	0	0	0	0	0	0	0	0	0
1780	0	59			0	0	0	0	0	0	0	0	0	0	0	0	0	0	1	0	2	2-6 marzo		1	2	3	4	5	6	0	8	9	10	0	12	13	14	0	16	0	0	0	0	21	0	0	24	25	26
414	1	60			0	0	0	0	0	0	0	0	0	0	0	0	0	0	1	0	2	7-14 marzo		1	0	0	4	5	6	7	8	9	10	0	0	13	14	0	0	0	0	19	0	0	22	0	0	25	0
245	0	64			0	0	0	0	0	0	0	0	0	0	0	0	0	0	1	0	2	7-14 marzo		0	2	0	4	5	0	7	0	9	10	0	12	13	14	15	0	0	0	0	0	21	0	0	24	25	26
3517	0	67			1	2	3	0	0	6	7	0	9	0	11	0	0	0	1	0	2	7-14 marzo		1	2	0	4	5	6	7	8	9	10	11	12	13	14	0	16	0	0	0	0	0	22	23	0	25	26
3222	0	63	1	1	0	0	0	0	0	0	0	0	0	0	0	0	0	0	2	1	2	2-6 marzo		1	2	0	4	5	6	7	8	9	10	11	12	13	14	15	0	0	18	0	0	21	22	23	24	25	26
3043	0	42	1	1	0	0	0	0	0	0	0	0	0	0	0	0	0	0	2	1	2	24 febbraio - 1 marzo		1	2	3	4	5	6	0	8	9	10	11	12	13	14	0	16	0	0	0	0	21	22	0	0	25	0
1422	0	57	1	1	0	0	0	0	0	0	0	0	0	0	0	0	0	0	2	1	2	7-14 marzo		1	2	3	4	5	6	0	0	9	10	0	12	13	14	15	0	0	18	0	0	21	0	23	0	25	26
5	0	59	1	1	0	0	0	0	0	0	0	0	0	0	0	0	0	0	2	1	2	7-14 marzo		1	2	3	4	5	6	0	0	9	10	0	12	13	14	0	0	0	18	0	0	21	0	0	24	25	26
1437	0	47	1	1	0	0	0	0	0	0	0	0	0	0	0	0	0	0	1	1	2	dopo il 14 marzo		1	2	3	0	5	0	0	0	9	10	0	12	13	0	15	0	0	0	0	0	21	22	0	0	25	26
661	0	63	1	1	1	2	3	4	0	0	0	0	0	0	0	0	0	0	3	1	2	7-14 marzo		1	2	3	4	5	6	7	8	9	10	0	12	13	14	15	16	0	0	0	0	21	22	23	0	25	26
3474	0	36	1	1	0	0	0	0	0	0	0	0	0	0	0	0	0	0	2	1	2	21-23 febbraio		1	2	3	4	5	6	7	0	9	10	0	12	13	14	0	0	17	0	0	0	21	0	0	24	25	26
2061	0	67	1	1	0	0	0	0	0	0	0	0	0	0	0	0	0	0	2	1	2	dopo il 14 marzo		1	2	0	0	5	6	0	0	9	10	11	0	0	0	15	0	0	0	0	0	21	0	23	0	25	26
2699	1	26	1	1	0	0	0	0	0	0	0	0	0	0	0	0	0	0	2	1	2	7-14 marzo		1	2	3	4	5	6	7	0	9	10	0	12	13	14	0	16	0	0	0	0	21	22	23	0	25	26
1009	0	41	1	1	0	0	0	0	0	0	0	0	0	0	0	0	0	0	2	1	2	7-14 marzo		1	2	3	0	0	0	0	0	9	0	0	12	13	0	0	0	0	0	0	0	0	0	0	0	0	0
1407	0	69	1	1	0	0	0	0	0	0	0	0	0	0	0	0	0	0	3	1	2	24 febbraio - 1 marzo		0	2	0	4	5	6	7	8	0	10	0	12	0	0	0	16	0	0	0	0	21	22	23	0	25	0
2844	1	55	1	1	0	0	0	0	0	0	0	0	0	0	0	0	0	0	1	1	2	7-14 marzo		1	2	3	0	0	6	0	0	9	10	0	12	13	14	15	0	0	0	0	0	21	0	0	24	25	26
338	0	27	1	1	0	0	0	0	0	0	0	0	0	0	0	0	0	0	2	1	2	2-6 marzo		1	2	3	4	5	6	7	8	9	10	0	12	13	14	0	16	0	0	0	0	21	22	0	0	25	26
3622	0	31	1	1	0	0	0	0	0	0	0	0	0	0	0	0	0	0	2	1	2	7-14 marzo		1	2	3	4	5	6	7	8	9	0	11	12	0	14	15	0	0	0	0	0	21	0	23	24	25	26
687	0	49	1	1	0	0	0	0	0	0	0	0	0	0	0	0	0	0	2	1	2	24 febbraio - 1 marzo		1	2	3	4	5	6	7	8	9	10	11	12	13	14	0	16	0	0	0	0	21	0	0	24	25	26
489	1	52	1	1	1	2	3	4	0	0	0	0	0	0	0	12	0	0	2	1	2	21-23 febbraio		1	2	3	4	5	6	7	8	9	10	11	12	13	14	15	0	17	0	0	0	21	0	0	24	25	26
2388	0	61	1	1	0	0	0	0	0	0	0	0	0	0	0	0	0	0	2	1	2	2-6 marzo		1	2	3	4	5	6	7	8	9	10	11	12	13	14	15	16	0	0	19	0	21	22	0	24	25	26
1921	0	60	1	1	0	0	0	0	0	0	0	0	0	0	0	0	0	0	3	1	2	7-14 marzo		0	0	0	0	0	0	0	0	0	0	0	0	0	0	0	0	0	0	0	0	0	0	0	0	0	0
3619	0	53	1	1	0	0	0	0	0	0	0	0	0	0	0	0	0	0	3	1	2	7-14 marzo		0	2	0	4	5	6	0	0	0	10	0	12	0	0	0	0	0	18	0	0	21	22	0	0	25	26
401	0	60	1	1	0	0	0	0	0	0	0	0	0	0	0	0	0	0	1	1	2	dopo il 14 marzo		1	2	0	4	0	6	0	0	9	10	0	12	13	0	0	16	0	0	0	0	21	0	23	0	0	0
48	0	62	1	1	1	0	3	0	0	6	0	0	0	0	0	0	0	0	2	1	2	dopo il 14 marzo		0	0	0	0	0	0	0	0	0	0	0	0	0	0	0	0	0	0	0	0	0	0	0	0	0	0
1830	0	33	1	1	0	0	0	0	0	0	0	0	0	0	0	0	0	0	1	1	2	2-6 marzo		1	2	3	4	5	6	7	8	9	10	11	12	13	0	15	0	0	0	0	0	21	22	0	0	25	0
2080	1	42	1	1	0	0	0	0	0	0	0	0	0	0	0	0	0	0	2	1	2	24 febbraio - 1 marzo		0	2	0	0	0	0	7	0	9	0	11	12	0	0	0	16	0	0	0	0	21	22	0	0	25	26
45	0	38	1	1	0	0	0	0	0	0	0	0	0	0	0	0	0	0	2	1	2	24 febbraio - 1 marzo		1	2	3	4	5	6	7	0	9	10	11	12	13	0	0	16	0	0	19	0	21	0	23	24	25	26
3553	0	57	1	1	0	0	0	0	0	0	0	0	0	0	0	0	0	0	3	1	2	21-23 febbraio		0	2	0	4	5	6	7	8	0	10	11	12	0	0	0	16	0	0	0	0	0	0	23	0	25	26
600	1	28	1	1	0	0	0	0	0	0	0	0	0	0	0	0	0	0	1	1	2	7-14 marzo		1	2	0	4	5	6	7	8	9	10	11	12	0	0	0	16	0	0	0	0	21	22	23	0	25	0
3767	0	52	1	1	0	0	0	0	0	0	0	0	0	0	0	0	0	0	3	1	2	2-6 marzo		0	0	0	0	0	6	7	8	0	10	11	12	0	0	0	16	0	0	0	0	0	0	0	24	0	0
986	1	39	1	1	0	0	0	0	0	0	0	0	0	0	0	0	0	0	2	1	2	24 febbraio - 1 marzo		1	2	0	4	5	0	0	0	9	10	0	12	0	0	0	16	0	0	0	0	21	0	0	24	25	26
3759	1	36	1	1	1	2	3	4	5	0	7	0	0	0	11	0	0	0	2	1	2	7-14 marzo		0	0	3	0	0	0	7	0	0	10	11	12	13	0	0	16	0	0	0	0	21	0	23	0	25	26
3787	1	53	1	1	1	0	0	0	0	6	0	8	0	0	0	0	0	0	3	1	2	2-6 marzo		1	2	0	0	0	6	7	8	9	10	0	12	0	0	0	16	0	0	0	0	0	22	23	0	25	26
303	1	67	1	1	0	0	0	0	0	0	0	0	0	0	0	0	0	0	3	1	2	2-6 marzo		0	0	0	4	0	6	0	0	9	0	0	12	0	0	0	0	0	0	0	0	0	0	0	0	0	0
1793	0	60	1	1	0	0	0	0	0	0	0	0	0	0	0	0	0	0	1	1	2	7-14 marzo		1	2	0	4	5	6	7	8	9	0	0	0	0	0	0	0	17	0	0	0	0	0	0	24	25	0
2030	0	61	1	1	0	0	0	0	0	0	0	0	0	0	0	0	0	0	2	1	2	24 febbraio - 1 marzo		1	2	0	4	5	6	7	8	9	10	11	12	0	14	0	16	0	0	0	0	21	0	0	24	25	26
1420	0	42	1	1	1	0	0	0	0	0	0	0	0	0	0	0	0	0	2	1	2	dopo il 14 marzo		1	2	0	4	0	0	7	8	9	0	0	12	13	0	0	0	17	0	19	0	21	0	0	24	25	26
2768	1	31	1	1	0	0	0	0	0	0	0	0	0	0	0	0	0	0	2	1	2	7-14 marzo		1	2	3	0	5	6	7	8	9	10	11	12	13	0	0	16	0	0	0	0	21	0	0	24	25	26
1397	0	56	1	1	0	0	0	0	0	0	0	0	0	0	0	0	0	0	1	1	2	7-14 marzo		1	2	3	4	5	6	7	8	9	10	0	12	0	14	15	16	0	0	0	0	21	0	23	0	25	26
3571	1	61	1	1	0	0	0	0	0	0	0	0	0	0	0	0	0	0	3	1	2	21-23 febbraio		1	2	0	4	5	6	0	0	9	10	11	12	13	14	0	16	0	0	0	0	21	22	23	0	25	26
753	1	52	1	1	0	0	0	0	0	0	0	0	0	0	0	0	0	0	2	1	2	2-6 marzo		0	0	0	0	0	6	0	0	9	0	0	12	13	0	0	16	0	0	0	0	21	22	0	24	25	26
3547	0	58	1	1	0	0	0	0	0	0	0	0	0	0	0	0	0	0	3	1	2	24 febbraio - 1 marzo		1	2	3	4	5	6	7	8	9	10	11	12	0	14	0	16	0	0	0	0	21	0	0	24	25	26
2971	0	40	1	4	0	0	0	0	0	0	0	0	0	0	0	0	0	0	2	1	2	2-6 marzo		1	2	3	0	0	6	7	8	9	10	11	0	13	0	0	16	0	0	0	0	21	0	0	24	25	26
1580	1	48	1		0	0	0	0	0	0	0	0	0	0	0	0	0	0	3	1	2	24 febbraio - 1 marzo		1	0	3	0	0	6	7	8	9	0	11	12	0	14	15	16	0	0	0	0	0	0	0	0	0	0
982	0	65	4	1	0	0	0	0	0	0	0	0	0	0	0	0	0	0	2	1	2	21-23 febbraio		1	2	3	4	5	6	0	0	9	10	11	12	13	14	15	16	0	0	0	0	21	0	23	24	25	26
3142	0	56	4	1	1	2	0	4	0	0	7	0	0	0	0	0	0	0	2	1	2	2-6 marzo		1	2	3	4	5	6	0	0	9	10	0	12	13	14	0	0	0	0	0	0	21	0	0	24	25	0
3110	1	27	4	1	0	0	0	0	0	0	0	0	0	0	0	0	0	0	2	1	2	7-14 marzo		1	2	0	0	5	0	0	0	0	10	0	0	0	0	0	16	0	0	0	0	0	0	23	0	25	26
1692	0	48	4	1	0	0	0	0	0	0	0	0	0	0	0	0	0	0	2	1	2	7-14 marzo		1	2	3	4	5	6	0	8	9	10	11	12	13	14	0	16	17	0	0	0	21	22	23	0	25	26
3629	0	30	4	4	0	0	0	0	0	0	0	0	0	0	0	0	0	0	2	1	2	2-6 marzo		1	2	3	4	5	6	0	0	9	10	0	12	13	0	15	16	0	0	0	0	21	0	0	24	25	26
2738	1	60	4	4	1	0	0	4	0	0	7	8	9	0	11	0	0	0	3	1	2	2-6 marzo		1	2	0	4	5	0	0	0	0	0	0	12	13	0	0	0	0	0	0	0	0	0	0	0	25	26
3065	1	29	4	4	0	0	0	0	0	0	0	0	0	0	0	0	0	0	1	1	2	21-23 febbraio		1	2	3	4	5	6	0	0	0	10	0	12	0	0	0	16	0	0	0	0	0	0	0	0	0	0
2605	1	68	4	4	0	0	0	0	0	0	0	0	0	0	0	0	0	0	2	1	2	21-23 febbraio		1	2	0	4	5	6	0	0	9	10	0	12	13	14	0	0	0	0	0	0	21	22	0	24	25	26
3820	0	28	4	4	0	0	0	0	0	0	0	0	0	0	0	0	0	0	2	1	2	7-14 marzo		1	2	3	4	5	6	0	0	9	10	11	12	13	14	0	16	0	0	0	0	0	22	0	0	25	26
2291	0	27	4	4	0	0	0	0	0	0	0	0	0	0	0	0	0	0	1	1	2	21-23 febbraio		1	2	3	4	5	6	7	8	9	10	11	0	13	14	15	0	0	0	0	0	21	22	0	0	25	26
3031	1	27	4	4	0	0	0	0	0	0	0	0	0	0	0	0	0	0	2	1	2	24 febbraio - 1 marzo		0	0	0	4	5	6	7	8	0	10	11	12	13	0	0	16	0	0	0	0	21	0	23	0	25	26
1979	0	60	4	13	0	0	0	0	0	0	0	0	0	0	0	0	0	0	3	1	2	dopo il 14 marzo		0	0	0	0	0	0	0	0	0	0	0	0	0	0	0	0	0	0	0	0	0	0	0	0	0	0
1017	0	50	8	1	0	0	0	0	0	0	0	0	0	0	0	0	0	0	2	1	2	7-14 marzo		1	2	0	4	5	6	7	8	0	10	0	12	0	0	0	0	0	0	0	0	0	0	23	0	25	26
1449	0	64	8	1	0	0	0	0	0	0	0	0	0	0	0	0	0	0	1	1	2	7-14 marzo		1	2	0	4	5	6	0	8	9	10	0	12	13	14	0	16	0	0	0	0	21	22	0	0	25	26
3120	0	28	8	1	0	0	0	0	0	0	0	0	0	0	0	0	0	0	2	1	2	2-6 marzo		1	2	3	0	0	6	7	8	9	10	11	12	13	14	0	16	0	0	0	0	21	22	0	0	25	26
509	0	65	8	1	0	0	0	0	0	0	0	0	0	0	0	0	0	0	1	1	2	21-23 febbraio		0	0	0	0	0	0	0	0	0	0	0	0	0	0	0	16	0	0	0	0	0	22	0	24	25	26
1525	1	33	8	8	0	0	0	0	0	0	0	0	0	0	0	0	0	0	2	1	2	7-14 marzo		1	2	3	4	5	6	7	8	9	10	11	12	13	0	0	0	0	0	0	0	21	0	0	24	25	26
281	1	43	8	8	0	0	0	0	0	0	0	0	0	0	0	0	0	0	2	1	2	24 febbraio - 1 marzo		1	2	3	4	5	6	0	0	9	10	0	12	13	14	0	0	0	0	0	0	0	0	0	24	25	0
971	0	42	8	8	0	0	0	0	0	0	0	0	0	0	0	0	0	0	1	1	2	24 febbraio - 1 marzo		1	2	3	0	5	6	0	0	9	10	0	12	13	14	0	16	0	0	0	0	21	22	0	0	25	26
1191	0	61	9	9	0	0	0	0	0	0	0	0	0	0	0	0	0	0	2	1	2	2-6 marzo		1	2	3	4	5	6	7	0	9	10	11	12	13	14	15	0	0	0	0	0	21	22	0	24	25	26
1149	0	41	13	13	0	0	0	0	0	0	0	0	0	0	0	0	0	0	2	1	2	21-23 febbraio		1	2	3	4	5	6	7	8	9	0	0	12	13	14	0	16	0	0	0	0	21	0	0	24	25	26
1748	0	61	7	7	0	0	0	0	0	0	0	0	0	0	0	0	0	0	3	1	2	24 febbraio - 1 marzo		1	2	3	4	5	6	7	8	9	10	11	12	13	14	0	0	17	0	0	0	21	22	0	0	25	26
1577	1	57	7	7	0	0	0	0	0	0	0	0	0	0	0	0	0	0	2	1	2	7-14 marzo		1	2	0	4	5	6	0	0	9	10	0	12	13	14	0	16	0	18	0	0	21	22	23	0	25	26
3665	0	52	7	7	0	0	0	0	0	0	0	0	0	0	0	0	0	0	2	1	2	7-14 marzo		1	2	3	4	5	6	7	8	9	10	0	12	13	14	15	0	0	0	0	0	0	0	0	24	25	26
1804	1	47	10	10	0	0	0	0	0	0	0	0	0	0	0	0	0	0	3	1	2	7-14 marzo		1	2	3	4	0	0	0	8	0	10	0	0	0	0	0	16	0	0	0	0	21	0	23	24	25	26
3804	0	51	10	10	1	0	0	0	0	0	0	8	9	0	11	12	0	0	3	1	2	7-14 marzo		1	2	3	4	0	0	7	0	9	10	0	12	0	0	0	0	0	0	0	0	21	22	0	0	0	26
613	0	41	3	3	0	0	0	0	0	0	0	0	0	0	0	0	0	0	2	1	2	2-6 marzo		1	0	0	4	5	6	0	0	9	10	0	12	13	14	0	0	17	0	0	0	21	0	0	24	25	26
3439	0	38	3	3	0	0	0	0	0	0	0	0	0	0	0	0	0	0	2	1	2	7-14 marzo		1	2	0	0	0	6	7	0	9	10	0	12	13	14	0	0	0	0	19	0	0	0	0	24	0	26
2208	0	56	3	3	0	0	0	0	0	0	0	0	0	0	0	0	0	0	2	1	2	7-14 marzo		1	2	3	4	5	0	0	0	9	10	0	0	0	0	0	0	0	0	0	0	0	22	0	24	25	0
2588	1	48	3	7	0	0	0	0	0	0	0	0	0	0	0	0	0	0	2	1	2	2-6 marzo		1	2	0	4	5	6	0	8	0	0	0	12	13	14	0	0	0	0	0	0	21	0	23	0	25	26
3048	0	59	3	7	0	0	0	0	0	0	0	0	0	0	0	0	0	0	2	1	2	24 febbraio - 1 marzo		1	2	3	4	5	6	0	0	0	10	0	12	0	14	0	0	0	18	0	20	21	22	0	24	25	26
2596	1	58	6	6	0	0	0	0	0	0	0	0	0	0	0	0	0	0	3	1	2	24 febbraio - 1 marzo		0	0	3	0	5	6	0	0	0	10	0	12	13	0	0	0	0	0	0	0	0	22	0	0	25	26
1732	0	54	6	6	0	0	0	0	0	0	0	0	0	0	0	0	0	0	2	1	2	7-14 marzo		0	0	0	0	0	0	0	0	0	0	0	0	0	0	0	0	0	0	0	0	0	0	0	0	0	0
2941	0	60	6	6	1	0	0	4	0	6	0	8	9	0	11	0	0	0	3	1	2	dopo il 14 marzo		0	0	0	0	0	0	0	0	0	0	0	0	0	0	0	0	0	0	0	0	0	0	0	0	0	0
2074	0	33	6	6	0	0	0	0	0	0	0	0	0	0	0	0	0	0	1	1	2	21-23 febbraio		1	2	3	4	5	6	0	0	9	0	11	12	0	0	0	16	0	0	0	0	21	0	0	24	25	26
1995	0	30	6	6	1	0	0	4	0	0	0	0	0	0	0	12	0	0	2	1	2	2-6 marzo		1	2	3	4	5	6	0	8	9	10	11	12	13	14	15	16	0	0	0	0	21	0	0	0	25	26
1646	1	39	6	6	0	0	0	0	0	0	0	0	0	0	0	0	0	0	2	1	2	7-14 marzo		1	2	3	4	0	6	7	0	9	10	0	12	13	14	0	16	0	0	0	0	21	0	0	24	25	26
3392	1	40	5	5	0	0	0	0	0	0	0	0	0	0	0	0	0	0	2	1	2	2-6 marzo		0	2	3	4	5	6	0	0	9	0	11	12	0	0	15	16	0	0	0	0	21	22	23	0	25	26
1572	0	54	5	5	0	0	0	0	0	0	0	0	0	0	0	0	0	0	2	1	2	2-6 marzo		0	0	0	0	0	0	0	0	0	0	0	0	0	0	0	0	0	0	0	0	0	0	0	0	0	0
1618	1	50	5	5	1	0	3	4	0	0	0	0	0	10	11	0	0	0	2	1	2	7-14 marzo		1	2	3	4	5	6	0	0	0	10	11	12	0	14	0	0	0	0	0	0	21	0	0	24	25	26
2135	1	27	5	5	0	0	0	0	0	0	0	0	0	0	0	0	0	0	2	1	2	21-23 febbraio		1	2	3	4	5	6	0	0	9	0	0	12	13	0	0	0	0	0	0	0	21	0	0	24	25	26
2595	0	27	5	5	0	0	0	0	0	0	0	0	0	0	0	0	0	0	2	1	2	2-6 marzo		1	2	3	4	5	6	7	0	0	10	0	0	0	0	15	0	0	0	0	0	21	22	0	0	0	26
2027	0	45	5	6	0	0	0	0	0	0	0	0	0	0	0	0	0	0	2	1	2	24 febbraio - 1 marzo		1	2	3	4	5	6	0	0	9	10	0	12	13	0	0	16	0	0	0	0	21	0	0	24	25	26
1429	0	52	5	5	0	0	0	0	0	0	0	0	0	0	0	0	0	0	1	1	2	21-23 febbraio		1	2	3	4	5	6	0	0	9	10	11	12	13	14	0	16	0	0	0	0	21	22	0	24	25	26
1864	0	55	5	5	0	0	0	0	0	0	0	0	0	0	0	0	0	0	2	1	2	24 febbraio - 1 marzo		1	2	0	0	0	6	7	0	9	10	11	12	0	0	15	0	0	0	19	0	21	22	0	0	0	26
377	0	64	5	5	0	0	0	0	0	0	0	0	0	0	0	0	0	0	3	1	2	24 febbraio - 1 marzo		0	0	0	4	5	6	7	8	0	0	11	12	0	0	0	0	0	18	0	0	21	0	23	0	25	26
2862	0	58	5	5	0	0	0	0	0	0	0	0	0	0	0	0	0	0	2	1	2	21-23 febbraio		1	2	3	4	5	6	0	0	9	10	11	12	13	14	15	0	0	0	0	0	21	22	0	24	25	26
894	1	29	5	5	0	0	0	0	0	0	0	0	0	0	0	0	0	0	2	1	2	7-14 marzo		1	2	3	4	5	6	0	0	9	10	11	12	0	14	0	16	0	0	0	0	21	0	23	24	25	26
950	0	53	5	5	0	0	0	0	0	0	0	0	0	0	0	0	0	0	3	1	2	24 febbraio - 1 marzo		1	0	0	4	5	6	0	0	0	10	11	12	13	14	0	0	0	0	0	0	0	0	0	24	25	26
3334	1	43	5	5	0	0	0	0	0	0	0	0	0	0	0	0	0	0	2	1	2	7-14 marzo		1	0	0	0	0	0	0	0	9	10	0	12	0	14	0	16	0	0	0	0	21	0	0	24	25	26
2201	0	57	5	5	0	0	0	0	0	0	0	0	0	0	0	0	0	0	2	1	2	21-23 febbraio		1	2	3	4	5	6	0	0	9	10	0	12	13	14	15	16	0	0	0	0	21	0	23	0	25	26
1652	0	57	5	5	1	0	0	0	0	0	0	0	9	0	11	0	0	0	2	1	2	21-23 febbraio		1	0	3	4	5	0	0	0	9	10	11	12	13	14	15	0	0	0	0	0	21	22	0	0	25	26
20	0	60	2	2	0	0	0	0	0	0	0	0	0	0	0	0	0	0	2	1	2	7-14 marzo		1	2	3	4	5	6	0	0	9	10	11	12	13	14	0	16	0	0	0	0	21	0	23	0	25	26
355	0	50	2	2	0	0	0	0	0	0	0	0	0	0	0	0	0	0	2	1	2	2-6 marzo		1	2	3	4	5	6	7	0	9	10	11	12	13	14	0	16	0	18	0	0	21	22	0	0	25	26
57	1	27	11	1	0	0	0	0	0	0	0	0	0	0	0	0	0	0	2	1	2	7-14 marzo		1	2	0	4	5	6	0	0	0	10	0	0	0	0	15	16	0	0	0	0	0	22	0	0	25	26
1950	0	63	9	9	0	0	0	0	0	0	0	0	0	0	0	0	0	0	2	1	2	21-23 febbraio		0	0	0	0	0	0	0	0	0	0	0	0	0	0	0	0	0	0	0	0	0	0	0	0	0	0
2653	0	63	9	9	0	0	0	0	0	0	0	0	0	0	0	0	0	0	1	1	2	21-23 febbraio		1	2	3	0	5	6	0	0	9	10	11	12	13	14	0	16	0	0	0	0	21	0	23	24	25	26
2318	1	37	9	1	1	0	0	0	0	6	0	0	9	0	11	0	0	0	1	1	2	7-14 marzo		1	2	0	4	5	6	0	0	9	10	0	12	13	14	0	16	0	0	0	20	0	0	0	0	25	0
3805	0	65	13	1	0	0	0	0	0	0	0	0	0	0	0	0	0	0	2	1	2	21-23 febbraio		1	2	3	4	5	6	7	8	9	10	11	12	13	0	0	16	0	0	0	0	21	0	0	24	25	26
2193	0	60	12	12	0	0	0	0	0	0	0	0	0	0	0	0	0	0	2	1	2	7-14 marzo		0	0	0	4	5	0	0	0	0	0	0	12	13	14	0	0	0	18	0	0	21	0	0	24	25	26
1202	0	58			0	0	0	0	0	0	0	0	0	0	0	0	0	0	2	1	2	24 febbraio - 1 marzo		1	2	0	4	5	6	7	0	9	10	0	12	13	14	0	16	0	0	0	0	21	22	0	0	25	26
2192	1	60	1	1	0	0	0	0	0	0	0	0	0	0	0	0	0	0	1		2	7-14 marzo		1	2	3	4	5	6	0	0	9	10	11	12	13	14	0	16	0	0	0	0	21	0	0	24	25	26
885	0	59	1	1	0	0	0	0	0	0	0	0	0	0	0	0	0	0	1		2	7-14 marzo		0	2	3	4	5	6	7	0	9	10	11	12	13	14	15	16	0	0	0	0	21	0	0	24	25	26
2062	0	64	1	1	0	0	0	0	0	0	0	0	0	0	0	0	0	0	1		2	21-23 febbraio		0	0	0	0	0	0	0	0	0	0	0	0	0	0	0	0	0	0	0	0	0	0	0	0	0	0
3597	0	56	1	1	0	0	0	0	0	0	0	0	0	0	0	0	0	0	1		2	2-6 marzo		1	2	3	4	5	6	7	8	9	10	0	12	13	14	15	0	0	0	0	0	0	0	0	24	25	26
854	0	62	1	1	1	0	3	4	0	6	0	0	9	0	0	0	0	0	1		2	7-14 marzo		1	2	3	4	0	6	0	0	9	0	11	12	13	0	0	16	0	0	0	0	21	0	0	24	25	26
3483	0	52	1	1	1	2	0	0	0	6	0	0	9	0	0	0	13	0	1		2	7-14 marzo		0	2	0	4	5	6	0	0	9	10	0	0	0	14	0	16	0	0	0	0	0	22	0	0	25	26
2574	0	62	1	1	1	0	0	0	0	0	0	8	9	0	0	0	0	0	1		2	7-14 marzo		1	2	3	0	5	6	7	8	0	10	0	0	13	14	0	0	17	0	0	0	21	0	0	24	25	26
992	0	64	1	1	1	0	3	0	0	0	0	0	0	0	0	0	0	0	1		2	7-14 marzo		0	2	3	0	0	6	0	0	0	10	0	0	0	14	0	16	0	0	0	0	0	0	23	0	25	26
1344	0	59	1	1	0	0	0	0	0	0	0	0	0	0	0	0	0	0	1		2	24 febbraio - 1 marzo		1	2	3	4	5	6	7	0	9	10	0	12	13	14	0	0	0	0	19	0	0	0	0	24	25	26
3710	1	55	1	1	0	0	0	0	0	0	0	0	0	0	0	0	0	0	1		2	7-14 marzo		1	2	3	0	5	6	0	0	0	0	0	12	13	14	0	16	0	0	0	0	21	0	0	24	25	26
526	0	64	1	1	0	0	0	0	0	0	0	0	0	0	0	0	0	0	1		2	21-23 febbraio		0	0	0	0	0	0	0	0	0	0	0	0	0	0	0	0	0	0	0	0	0	0	0	0	0	0
2721	1	63	1	1	0	0	0	0	0	0	0	0	0	0	0	0	0	0	1		2	24 febbraio - 1 marzo		0	0	0	0	0	0	0	0	0	0	0	0	0	0	0	0	0	0	0	0	0	0	0	0	0	0
740	0	57	1	1	0	0	0	0	0	0	0	0	0	0	0	0	0	0	1		2	7-14 marzo		1	2	3	4	5	6	7	0	9	10	0	12	13	14	15	0	0	0	0	0	21	22	23	0	25	0
756	0	51	1	1	0	0	0	0	0	0	0	0	0	0	0	0	0	0	1		2	2-6 marzo		1	2	3	4	5	6	0	0	9	10	0	12	13	0	0	0	0	18	0	0	21	0	0	24	25	26
2008	0	53	1	1	0	0	0	0	0	0	0	0	0	0	0	0	0	0	1		2	7-14 marzo		1	2	3	4	5	6	0	0	9	10	11	12	13	14	0	16	0	0	0	0	21	22	0	0	25	26
1940	0	63	1	1	0	0	0	0	0	0	0	0	0	0	0	0	0	0	1		2	24 febbraio - 1 marzo		1	2	3	4	5	6	7	8	9	10	0	12	13	14	0	16	0	0	0	0	21	22	0	0	25	26
1248	0	61	1	1	1	0	0	0	0	0	0	0	0	0	0	0	0	0	1		2	dopo il 14 marzo		1	2	3	4	5	6	7	8	9	10	11	12	13	14	15	16	0	0	0	0	21	22	23	24	25	26
2769	0	49	1	1	0	0	0	0	0	0	0	0	0	0	0	0	0	0	1		2	2-6 marzo		1	2	3	0	0	6	0	0	9	10	0	12	13	14	0	16	0	0	0	0	21	22	0	0	25	26
1163	0	45	1	1	1	2	3	4	0	0	0	0	0	0	0	0	0	0	1		2	24 febbraio - 1 marzo		1	2	3	4	5	6	0	0	9	10	11	12	13	14	0	16	0	0	0	0	0	0	23	24	25	26
2601	1	60	1	1	0	0	0	0	0	0	0	0	0	0	0	0	0	0	1		2	7-14 marzo		1	2	3	4	5	6	7	8	9	10	11	12	13	14	0	0	0	0	0	20	21	0	23	24	25	26
1964	0	49	1	1	0	0	0	0	0	0	0	0	0	0	0	0	0	0	1		2	2-6 marzo		1	0	0	4	5	6	7	8	9	10	0	12	13	14	0	16	0	0	0	0	0	0	0	24	0	26
3707	1	49	1	1	0	0	0	0	0	0	0	0	0	0	0	0	0	0	1		2	dopo il 14 marzo		1	2	3	0	5	6	0	0	0	10	0	0	13	14	15	0	0	0	0	0	21	0	23	24	25	26
3243	0	53	1	1	0	0	0	0	0	0	0	0	0	0	0	0	0	0	1		2	dopo il 14 marzo		1	2	0	4	0	0	0	0	0	10	11	12	13	14	0	0	0	0	0	0	21	22	0	0	0	0
3769	0	53	1	1	0	0	0	0	0	0	0	0	0	0	0	0	0	0	1		2	2-6 marzo		1	2	0	4	5	6	7	8	9	10	0	12	13	14	0	16	0	0	0	0	21	22	0	0	25	26
2892	0	57	1	1	0	0	0	0	0	0	0	0	0	0	0	0	0	0	1		2	2-6 marzo		1	2	0	4	5	6	0	0	9	10	0	12	13	14	15	0	0	0	0	0	21	0	0	24	25	26
3408	0	48	1	1	0	0	0	0	0	0	0	0	0	0	0	0	0	0	1		2	7-14 marzo		1	2	3	4	5	6	7	0	9	10	11	12	13	14	15	0	17	0	0	0	21	22	0	24	25	26
3578	0	71	1	1	0	0	0	0	0	0	0	0	0	0	0	0	0	0	1		2	2-6 marzo		1	2	0	4	5	6	0	0	9	10	0	12	13	14	0	0	0	0	0	0	21	22	23	0	25	26
843	0	67	1	1	0	0	0	0	0	0	0	0	0	0	0	0	0	0	1		2	21-23 febbraio		1	2	3	4	5	6	0	0	9	10	11	12	13	14	0	16	0	0	0	0	21	0	0	24	25	26
2537	0	32	1	1	0	0	0	0	0	0	0	0	0	0	0	0	0	0	1		2	2-6 marzo		0	0	0	0	0	0	0	0	0	0	0	0	0	0	0	0	0	0	0	0	0	0	0	0	0	0
3341	0	65	1	1	1	2	0	0	0	0	0	8	9	0	11	0	0	0	1		2	2-6 marzo		0	2	0	4	5	6	0	0	0	10	0	12	13	0	0	0	0	0	19	0	0	0	0	24	25	0
2940	1	49	1	1	0	0	0	0	0	0	0	0	0	0	0	0	0	0	1		2	2-6 marzo		1	2	3	4	5	6	0	0	9	10	0	12	13	14	15	0	0	0	0	0	21	22	0	0	25	26
1598	1	45	1	1	0	0	0	0	0	0	0	0	0	0	0	0	0	0	2		2	7-14 marzo		1	2	3	4	5	6	7	8	9	10	11	12	13	14	15	16	0	0	0	0	21	22	23	24	25	26
1852	0	59	1	1	0	0	0	0	0	0	0	0	0	0	0	0	0	0	1		2	7-14 marzo		0	2	3	4	5	6	0	8	9	10	11	12	13	14	0	16	0	0	0	0	21	22	0	24	25	26
134	1	69	1	1	0	0	0	0	0	0	0	0	0	0	0	0	0	0	1		2	dopo il 14 marzo		1	2	3	4	5	6	7	8	9	0	11	12	13	14	0	16	0	0	0	0	21	0	0	0	25	26
3587	0	63	1	1	0	0	0	0	0	0	0	0	0	0	0	0	0	0	1		2	dopo il 14 marzo		1	2	3	4	5	6	0	0	9	10	11	12	13	14	15	16	17	18	19	20	21	22	23	24	25	26
655	0	68	1	1	0	0	0	0	0	0	0	0	0	0	0	0	0	0	1		2	2-6 marzo		1	2	3	4	5	6	7	8	9	10	11	12	13	14	15	0	0	0	0	0	21	22	0	0	25	26
3122	0	65	1	1	0	0	0	0	0	0	0	0	0	0	0	0	0	0	1		2	dopo il 14 marzo		0	0	0	0	0	0	0	0	0	0	0	0	0	0	0	0	0	0	0	0	0	0	0	0	0	0
116	0	67	1	1	0	0	0	0	0	0	0	0	0	0	0	0	0	0	1		2	7-14 marzo		1	2	3	4	5	6	7	8	9	10	11	12	13	14	15	16	0	0	0	0	21	0	23	24	25	26
3316	0	57	1	1	0	0	0	0	0	0	0	0	0	0	0	0	0	0	1		2	2-6 marzo		1	2	0	4	5	6	0	0	9	10	0	12	13	14	0	16	17	0	0	0	21	22	0	24	25	26
730	0	50	1	1	0	0	0	0	0	0	0	0	0	0	0	0	0	0	1		2	7-14 marzo	7-14 marzo	1	2	0	4	5	6	7	8	9	10	0	12	13	14	15	16	0	0	0	0	21	0	0	24	25	26
646	0	71	1	1	0	0	0	0	0	0	0	0	0	0	0	0	0	0	1		2	dopo il 14 marzo		0	2	0	0	0	0	0	0	0	0	0	0	13	0	15	0	0	0	0	0	0	0	0	24	0	0
3448	0	54	1	1	0	0	0	0	0	0	0	0	0	0	0	0	0	0	1		2	24 febbraio - 1 marzo		0	0	0	0	0	0	0	0	0	0	0	0	0	0	0	0	0	0	0	0	0	0	0	0	0	0
392	0	61	1	1	0	0	0	0	0	0	0	0	0	0	0	0	0	0	1		2	24 febbraio - 1 marzo		1	2	0	4	5	6	0	0	9	10	11	12	13	14	0	16	0	0	0	0	21	0	0	24	25	26
1427	0	69	1	1	0	0	0	0	0	0	0	0	0	0	0	0	0	0	1		2	24 febbraio - 1 marzo		0	2	0	4	5	6	7	8	9	10	11	12	13	14	15	16	0	0	0	0	21	22	23	0	25	26
3271	1	47	1	1	0	0	0	0	0	0	0	0	0	0	0	0	0	0	1		2	24 febbraio - 1 marzo		1	2	3	4	5	6	0	0	9	10	11	0	13	14	0	16	0	0	0	0	0	22	23	0	25	26
3497	0	62	1	1	0	0	0	0	0	0	0	0	0	0	0	0	0	0	1		2	7-14 marzo		1	2	3	4	5	6	7	8	9	10	11	12	13	14	0	16	0	0	0	0	21	22	23	24	25	26
1626	1	70	1	1	0	0	0	0	0	0	0	0	0	0	0	0	0	0	1		2	2-6 marzo		1	2	3	4	5	6	0	0	9	10	0	12	13	14	15	16	0	0	0	0	21	0	23	0	25	26
3374	0	66	1	1	0	0	0	0	0	0	0	0	0	0	0	0	0	0			2			0	0	0	0	0	0	0	0	0	0	0	0	0	0	0	16	0	0	0	0	0	0	0	0	25	0
2647	0	65	1	1	1	0	3	4	0	6	0	0	9	0	0	0	0	14	1		2	7-14 marzo		1	2	0	0	5	6	0	0	9	10	0	12	13	14	15	0	17	0	0	0	0	0	0	24	25	0
694	1	60	1	6	0	0	0	0	0	0	0	0	0	0	0	0	0	0	2		2	dopo il 14 marzo		1	2	3	4	5	6	0	0	9	10	0	12	13	14	0	16	0	0	0	0	21	22	23	0	25	26
3073	0	27	1	6	1	2	0	0	0	0	7	0	0	0	0	0	0	0	1		2	7-14 marzo		1	2	0	4	5	6	0	0	9	10	11	12	13	14	0	16	0	0	0	0	21	0	0	24	25	26
652	0	69	1	6	0	0	0	0	0	0	0	0	0	0	0	0	0	0	1		2	2-6 marzo		1	2	3	4	5	6	0	8	9	10	0	12	13	14	0	0	0	0	0	20	21	22	0	0	25	26
1109	1	48	1	6	0	0	0	0	0	0	0	0	0	0	0	0	0	0	1		2	21-23 febbraio		1	2	0	4	5	0	0	0	9	10	0	12	13	14	0	16	0	0	0	0	21	22	0	0	25	26
2432	0	53	1	8	0	0	0	0	0	0	0	0	0	0	0	0	0	0	1		2	2-6 marzo		1	2	3	4	5	6	7	8	9	10	0	12	13	14	0	0	0	0	0	20	21	22	0	0	25	26
267	0	53	1	8	0	0	0	0	0	0	0	0	0	0	0	0	0	0	1		2	dopo il 14 marzo		1	2	0	4	5	6	7	8	9	10	11	0	13	14	0	0	17	0	19	0	21	22	23	0	25	26
1679	1	60	1		0	0	0	0	0	0	0	0	0	0	0	0	0	0	1		2	2-6 marzo		1	2	3	4	5	6	7	8	9	10	11	12	13	14	15	0	0	18	0	0	21	22	23	24	25	26
895	0	68	1		0	0	0	0	0	0	0	0	0	0	0	0	0	0	1		2	24 febbraio - 1 marzo		1	2	3	4	5	0	0	0	9	10	11	12	13	14	0	16	0	0	0	0	21	22	23	24	25	26
30	0	50	4	1	0	0	0	0	0	0	0	0	0	0	0	0	0	0	1		2	2-6 marzo		0	2	0	0	0	6	0	0	9	10	0	12	0	0	0	16	0	0	0	0	0	0	0	24	25	26
2293	1	50	4	1	0	0	0	0	0	0	0	0	0	0	0	0	0	0	1		2	2-6 marzo		1	2	3	4	5	0	0	0	9	10	11	12	13	14	0	16	0	0	0	0	21	22	23	24	25	26
1143	1	31	4	1	1	2	3	4	0	0	7	0	0	10	11	0	0	0	1		2	2-6 marzo		1	0	0	0	0	0	0	0	9	0	0	12	0	14	0	0	0	0	0	20	0	22	0	0	25	26
3183	0	70	4	4	0	0	0	0	0	0	0	0	0	0	0	0	0	0	1		2	dopo il 14 marzo		0	2	0	4	5	6	0	0	9	10	0	12	13	14	0	16	0	0	0	0	0	0	0	24	25	26
2331	0	66	4	4	0	0	0	0	0	0	0	0	0	0	0	0	0	0	1		2	dopo il 14 marzo		1	2	3	0	0	6	0	0	0	10	0	12	13	14	0	0	0	0	0	0	21	22	0	24	25	26
147	0	37	4	4	1	0	3	0	0	6	0	0	9	0	0	0	0	0	1		2	7-14 marzo		1	2	3	4	5	0	0	0	9	0	0	12	13	0	0	0	0	0	0	0	21	0	0	24	25	0
3097	0	67	4	4	0	0	0	0	0	0	0	0	0	0	0	0	0	0	1		2	21-23 febbraio		1	2	3	4	5	6	0	0	9	10	0	12	13	14	0	16	0	0	0	0	21	22	0	24	25	26
2273	1	65	4	4	0	0	0	0	0	0	0	0	0	0	0	0	0	0	1		2	7-14 marzo		0	2	3	4	5	6	0	0	9	10	0	12	13	14	0	0	17	0	19	0	21	0	23	0	25	26
2250	0	63	4	4	0	0	0	0	0	0	0	0	0	0	0	0	0	0	1		2	2-6 marzo		1	0	3	4	5	6	0	0	9	10	11	12	13	0	15	0	0	0	0	0	21	22	0	0	25	0
2916	0	59	4	4	0	0	0	0	0	0	0	0	0	0	0	0	0	0	1		2	7-14 marzo		1	0	0	0	5	6	0	8	9	0	0	0	0	0	0	0	0	18	0	0	21	22	23	0	25	0
2594	0	61	4	4	0	0	0	0	0	0	0	0	0	0	0	0	0	0	1		2	dopo il 14 marzo		1	2	3	4	5	6	7	0	9	10	0	0	0	0	0	16	0	0	0	0	0	22	0	0	25	26
2582	0	63	4	4	0	0	0	0	0	0	0	0	0	0	0	0	0	0	1		2	2-6 marzo		1	2	0	4	5	6	0	0	0	10	0	12	13	14	0	16	0	0	0	0	21	22	0	0	25	26
1733	0	54	4	4	0	0	0	0	0	0	0	0	0	0	0	0	0	0	1		2	2-6 marzo		1	0	0	4	5	6	7	8	0	10	0	12	0	14	0	16	0	0	0	0	21	22	0	0	25	26
2360	0	66	4	4	0	0	0	0	0	0	0	0	0	0	0	0	0	0	1		2	7-14 marzo		1	2	0	4	5	6	0	0	9	0	0	12	13	14	0	0	0	0	0	0	21	22	0	24	25	26
2336	0	63	4	4	0	0	0	0	0	0	0	0	0	0	0	0	0	0	1		2	24 febbraio - 1 marzo		1	2	3	0	0	6	0	0	9	10	0	12	13	0	15	0	0	0	0	0	0	0	0	24	25	26
242	0	35	4	4	0	0	0	0	0	0	0	0	0	0	0	0	0	0	1		2	dopo il 14 marzo		1	2	3	0	0	6	0	0	9	10	0	12	13	14	0	0	17	0	0	0	21	0	0	24	25	26
67	1	65	4	4	0	0	0	0	0	0	0	0	0	0	0	0	0	0	1		2	7-14 marzo		1	2	3	4	5	6	0	0	9	10	11	12	13	14	15	0	0	0	0	0	0	0	0	24	25	26
873	0	70	4	4	0	0	0	0	0	0	0	0	0	0	0	0	0	0	1		2	21-23 febbraio		1	2	3	4	5	6	0	8	9	10	11	12	13	14	0	16	0	0	0	0	21	22	0	24	25	26
316	0	68	4	4	0	0	0	0	0	0	0	0	0	0	0	0	0	0	1		2	24 febbraio - 1 marzo		0	2	3	0	5	6	0	0	0	10	11	12	0	0	0	0	0	0	0	0	0	22	23	24	25	26
357	0	51	4	8	0	0	0	0	0	0	0	0	0	0	0	0	0	0	1		2	24 febbraio - 1 marzo		1	2	0	0	0	6	0	0	9	10	0	12	13	0	0	16	0	0	0	0	21	0	0	24	25	0
754	0	48	8	1	0	0	0	0	0	0	0	0	0	0	0	0	0	0	1		2	2-6 marzo		1	2	3	4	5	6	0	0	9	10	11	12	13	14	15	0	0	0	0	0	21	22	0	0	25	26
421	0	62	8	1	0	0	0	0	0	0	0	0	0	0	0	0	0	0	1		2	24 febbraio - 1 marzo		1	2	3	4	5	6	0	0	9	10	11	12	13	14	0	16	0	0	19	0	21	0	0	24	25	26
441	0	50	8	8	0	0	0	0	0	0	0	0	0	0	0	0	0	0	1		2	7-14 marzo		1	2	3	4	0	6	0	0	9	0	11	12	13	14	0	16	0	18	0	0	21	0	0	24	25	26
1271	0	59	8	8	0	0	0	0	0	0	0	0	0	0	0	0	0	0	1		2	2-6 marzo		1	2	3	4	5	6	7	8	9	10	11	12	13	14	0	16	0	0	0	0	21	22	0	24	25	26
1479	0	64	8	8	0	0	0	0	0	0	0	0	0	0	0	0	0	0	1		2	21-23 febbraio		1	2	0	4	5	0	7	0	0	0	0	12	13	14	0	16	0	0	0	0	21	22	0	0	25	26
608	0	59	8	8	0	0	0	0	0	0	0	0	0	0	0	0	0	0	1		2	7-14 marzo		1	2	3	4	5	6	0	0	9	0	0	12	13	14	0	16	0	0	0	0	21	0	0	24	25	26
445	1	46	8	8	0	0	0	0	0	0	0	0	0	0	0	0	0	0	1		2	dopo il 14 marzo		1	2	3	4	5	6	7	8	9	10	11	0	13	14	0	0	17	0	0	0	21	0	23	0	25	26
1506	1	57	8	8	0	0	0	0	0	0	0	0	0	0	0	0	0	0	1		2	dopo il 14 marzo		1	2	3	4	5	6	0	0	9	10	11	12	13	14	15	16	17	0	0	0	21	22	23	24	25	26
1266	0	58	8	8	0	0	0	0	0	0	0	0	0	0	0	0	0	0	1		2	24 febbraio - 1 marzo		1	2	3	4	5	6	7	8	9	10	11	12	13	14	15	0	17	0	0	0	21	22	0	24	25	26
920	0	58	8	8	0	0	0	0	0	0	0	0	0	0	0	0	0	0	1		2	24 febbraio - 1 marzo		1	2	3	4	5	6	0	0	9	10	0	12	13	14	0	0	0	18	0	0	21	22	0	0	25	0
1180	0	64	8	8	0	0	0	0	0	0	0	0	0	0	0	0	0	0	1		2	21-23 febbraio		1	2	3	4	5	6	7	8	9	10	11	12	13	14	15	16	0	0	0	0	21	22	0	0	25	26
913	0	49	8	8	0	0	0	0	0	0	0	0	0	0	0	0	0	0	1		2	2-6 marzo		1	2	3	4	5	6	0	0	9	10	11	12	13	14	15	16	0	0	0	0	21	0	0	24	25	26
1473	0	59	8	8	0	0	0	0	0	0	0	0	0	0	0	0	0	0	1		2	2-6 marzo		1	2	3	4	5	6	7	0	9	10	11	12	13	14	15	0	0	0	0	0	21	22	0	0	25	26
3025	0	56	8	8	0	0	0	0	0	0	0	0	0	0	0	0	0	0	1		2	7-14 marzo		1	2	3	4	5	6	0	0	9	10	0	12	13	14	15	16	0	0	0	0	21	0	0	24	25	26
915	1	44	8	8	0	0	0	0	0	0	0	0	0	0	0	0	0	0	1		2	7-14 marzo		1	2	0	4	5	6	0	0	0	0	0	12	0	0	15	0	0	0	0	0	21	0	0	24	25	26
1502	0	71	8	8	0	0	0	0	0	0	0	0	0	0	0	0	0	0	1		2	7-14 marzo	7-14 marzo	1	2	3	4	5	6	0	0	0	10	11	12	13	14	15	0	0	0	0	0	21	22	0	0	25	26
2174	0	42	9	9	0	0	0	0	0	0	0	0	0	0	0	0	0	0	1		2	7-14 marzo		0	2	3	4	5	0	0	0	0	10	0	12	13	14	0	16	0	0	0	0	21	0	0	24	25	26
2914	1	49	9	9	0	0	0	0	0	0	0	0	0	0	0	0	0	0	1		2	7-14 marzo		1	2	0	4	5	6	0	0	9	10	11	12	0	14	0	0	17	0	0	0	0	0	0	24	25	26
2678	0	57	9	9	0	0	0	0	0	0	0	0	0	0	0	0	0	0	1		2	2-6 marzo		1	2	3	4	5	6	0	8	9	10	11	12	13	14	0	0	0	18	19	0	21	22	0	0	25	26
3581	0	71	9	9	1	2	3	4	0	0	0	0	0	10	0	12	13	0	1		2	7-14 marzo		1	2	3	4	5	6	0	0	9	10	0	12	13	14	0	0	0	0	0	0	21	0	0	24	25	0
112	0	69	13	13	0	0	0	0	0	0	0	0	0	0	0	0	0	0	1		2	24 febbraio - 1 marzo		1	2	3	4	5	6	0	0	9	0	0	12	13	0	15	0	0	0	0	0	21	22	0	24	25	26
758	0	59	13	1	0	0	0	0	0	0	0	0	0	0	0	0	0	0	1		2	21-23 febbraio		1	2	0	4	5	6	7	8	9	10	11	12	13	14	15	16	0	0	0	0	0	0	23	24	25	26
1962	0		4	4	0	0	0	0	0	0	0	0	0	0	0	0	0	0	1		2	7-14 marzo		0	2	3	4	5	6	0	0	0	10	0	12	0	14	0	16	0	0	0	0	0	0	0	24	25	26
288	1	61	4	4	0	0	0	0	0	0	0	0	0	0	0	0	0	0	1		2	24 febbraio - 1 marzo		0	0	0	0	0	0	0	0	0	0	0	0	0	0	0	0	0	0	0	0	0	0	0	0	0	0
2713	1	41	4	4	0	0	0	0	0	0	0	0	0	0	0	0	0	0	1		2	dopo il 14 marzo		1	2	3	4	5	6	7	8	9	0	0	12	0	0	15	0	0	0	0	0	21	22	0	0	25	26
2348	0	70	4	4	0	0	0	0	0	0	0	0	0	0	0	0	0	0	1		2	24 febbraio - 1 marzo		0	0	0	0	0	0	0	0	0	0	0	0	0	0	0	0	0	0	0	0	0	0	0	0	0	0
2784	0	38	4	4	0	0	0	0	0	0	0	0	0	0	0	0	0	0	1		2	7-14 marzo		1	0	0	4	5	6	0	0	0	0	0	0	0	0	0	0	0	0	0	0	0	0	0	0	0	0
680	1	41	4	4	0	0	0	0	0	0	0	0	0	0	0	0	0	0	1		2	2-6 marzo		1	2	3	4	5	6	0	0	9	10	0	12	13	14	0	16	0	0	0	0	21	22	0	24	25	26
1989	1	62	4	4	0	0	0	0	0	0	0	0	0	0	0	0	0	0	1		2	7-14 marzo		1	2	0	4	5	6	7	8	9	10	0	12	13	14	0	16	0	18	0	0	21	0	0	24	25	0
3095	0	67	4	4	0	0	0	0	0	0	0	0	0	0	0	0	0	0	1		2	7-14 marzo		1	2	3	4	5	6	0	0	9	10	11	12	13	14	15	16	0	0	19	0	21	22	23	0	25	26
1970	0	38	7	3	0	0	0	0	0	0	0	0	0	0	0	0	0	0	1		2	2-6 marzo		1	0	0	0	0	0	0	0	0	0	0	12	0	0	0	0	0	0	0	0	21	0	0	24	25	0
2480	0	43	7	7	0	0	0	0	0	0	0	0	0	0	0	0	0	0	1		2	24 febbraio - 1 marzo		1	2	3	4	5	0	0	0	9	10	0	12	13	14	0	0	17	0	0	20	21	0	0	24	0	26
2274	0	50	7	7	0	0	0	0	0	0	0	0	0	0	0	0	0	0	1		2	7-14 marzo		1	2	3	4	5	6	0	0	9	10	0	12	13	14	0	0	0	0	0	0	21	0	23	0	25	26
2198	1	59	7	7	0	0	0	0	0	0	0	0	0	0	0	0	0	0	1		2	7-14 marzo		1	2	3	4	5	6	7	8	9	10	0	12	13	14	15	0	0	0	0	0	21	22	0	0	25	26
1688	0	44	7	7	0	0	0	0	0	0	0	0	0	0	0	0	0	0	1		2	7-14 marzo		1	2	3	4	5	6	7	8	9	10	0	12	13	14	15	16	0	0	0	0	21	0	0	24	25	26
2081	0	58	7	7	0	0	0	0	0	0	0	0	0	0	0	0	0	0			2	24 febbraio - 1 marzo		1	2	3	4	5	6	0	0	9	10	0	12	13	14	0	0	0	0	0	0	21	0	0	24	25	26
2392	0	54	7	7	0	0	0	0	0	0	0	0	0	0	0	0	0	0	1		2	2-6 marzo		0	2	0	4	5	0	0	0	9	10	0	12	13	0	0	16	0	0	0	0	21	22	0	0	0	0
274	0	57	7	7	0	0	0	0	0	0	0	0	0	0	0	0	0	0	1		2	dopo il 14 marzo		1	0	0	0	0	0	0	0	0	0	0	0	0	0	0	0	0	0	0	0	0	0	0	0	0	0
715	0	57	7	7	1	2	3	0	0	6	0	8	9	0	0	0	0	0	1		2	7-14 marzo		1	2	3	4	5	6	7	8	9	10	11	0	13	14	15	0	0	18	19	0	21	22	23	0	25	26
3116	0	56	7	7	0	0	0	0	0	0	0	0	0	0	0	0	0	0	1		2			0	0	0	0	0	0	0	0	0	0	0	0	0	0	0	0	0	0	0	0	0	0	0	0	0	0
576	0	52	7	7	0	0	0	0	0	0	0	0	0	0	0	0	0	0	1		2	7-14 marzo		1	2	0	4	5	6	0	0	9	10	0	12	13	14	0	0	0	0	0	0	21	22	0	24	0	0
1976	0	66	7	7	0	0	0	0	0	0	0	0	0	0	0	0	0	0	1		2	7-14 marzo		1	2	3	4	5	6	0	0	9	10	0	12	13	14	0	16	0	0	0	0	21	22	0	0	25	26
3029	0	31	10	10	0	0	0	0	0	0	0	0	0	0	0	0	0	0	1		2	24 febbraio - 1 marzo		1	2	0	4	5	6	0	0	0	10	0	12	13	14	0	0	17	0	0	0	21	0	23	0	25	26
1222	0	64	10	10	0	0	0	0	0	0	0	0	0	0	0	0	0	0	1		2	7-14 marzo		1	2	0	0	0	0	0	0	0	0	0	0	0	0	0	0	0	0	0	0	0	0	0	0	0	0
1046	0	55	10	10	1	0	3	0	0	6	0	0	0	0	0	0	0	14	1		2	7-14 marzo		0	0	0	0	0	0	0	0	0	0	0	0	0	0	0	0	0	0	0	0	0	0	0	0	0	0
243	1	33	10	10	0	0	0	0	0	0	0	0	0	0	0	0	0	0	1		2	24 febbraio - 1 marzo		1	2	3	4	5	6	0	0	9	10	11	12	13	14	15	0	17	0	0	0	21	22	23	0	25	26
3274	0	32	10	10	0	0	0	0	0	0	0	0	0	0	0	0	0	0	1		2	7-14 marzo		1	2	3	4	5	6	0	0	9	10	0	12	0	14	0	16	0	0	0	0	21	0	0	24	25	26
1731	0	46	10	10	0	0	0	0	0	0	0	0	0	0	0	0	0	0	1		2	2-6 marzo		1	2	3	4	5	6	0	0	9	0	0	12	13	14	0	0	0	0	0	20	21	0	0	24	25	26
1576	0	56	10	10	0	0	0	0	0	0	0	0	0	0	0	0	0	0	1		2	24 febbraio - 1 marzo		1	2	3	4	5	6	7	8	9	10	0	12	13	14	0	0	17	0	0	0	21	22	0	24	25	26
336	0	65	10	10	0	0	0	0	0	0	0	0	0	0	0	0	0	0	1		2	7-14 marzo		1	2	3	4	5	6	7	8	9	10	0	12	13	14	0	16	0	0	0	0	21	0	0	24	25	0
388	0	65	10	10	0	0	0	0	0	0	0	0	0	0	0	0	0	0	1		2	7-14 marzo		1	2	3	4	5	6	7	0	0	10	0	12	13	14	0	16	0	0	0	0	21	22	0	24	25	26
2056	0	56	3	3	1	2	0	4	0	0	7	0	0	10	11	0	0	0	1		2	7-14 marzo		1	2	3	4	5	6	0	0	9	10	0	12	13	14	0	16	0	0	0	0	21	0	0	24	25	0
61	0	62	3	3	0	0	0	0	0	0	0	0	0	0	0	0	0	0	1		2	7-14 marzo		1	2	3	4	5	6	7	8	9	10	0	12	13	14	15	0	0	18	0	0	21	22	23	0	25	0
3115	0	51	3	3	0	0	0	0	0	0	0	0	0	0	0	0	0	0	1		2	7-14 marzo		1	0	0	0	0	6	0	0	9	0	0	12	0	0	0	0	0	18	0	0	21	0	0	0	25	26
1654	0	42	3	3	1	0	0	0	0	6	7	0	9	0	0	0	0	0	1		2	7-14 marzo		1	2	3	4	5	6	0	0	9	10	0	12	13	14	15	0	0	18	19	0	21	0	0	24	25	26
3657	0	65	3	3	0	0	0	0	0	0	0	0	0	0	0	0	0	0	1		2	7-14 marzo		1	2	3	4	5	6	0	0	9	10	11	12	13	14	0	0	0	0	19	0	21	0	23	24	25	26
2873	1	35	3	3	0	0	0	0	0	0	0	0	0	0	0	0	0	0	1		2	7-14 marzo		0	2	3	0	0	6	0	0	9	0	0	12	13	0	15	0	17	0	0	0	21	0	0	24	25	26
540	0	60	3	3	0	0	0	0	0	0	0	0	0	0	0	0	0	0	1		2	7-14 marzo		1	2	3	4	5	6	0	0	9	10	0	12	13	14	15	16	0	0	0	0	21	0	0	24	25	26
3737	0	58	3	6	0	0	0	0	0	0	0	0	0	0	0	0	0	0	1		2	7-14 marzo		1	2	0	4	5	6	0	0	9	0	0	12	13	14	0	16	0	0	0	0	21	0	0	24	25	26
567	0	49	6	6	0	0	0	0	0	0	0	0	0	0	0	0	0	0	1		2	2-6 marzo		1	2	3	4	5	6	0	0	9	10	0	12	13	14	0	0	0	0	0	0	21	0	0	24	25	26
2225	1	57	6	6	0	0	0	0	0	0	0	0	0	0	0	0	0	0	1		2	24 febbraio - 1 marzo		1	2	3	4	5	6	0	0	9	10	0	12	13	14	0	0	0	18	0	0	21	0	23	0	0	26
1468	0	58	6	6	0	0	0	0	0	0	0	0	0	0	0	0	0	0	1		2	2-6 marzo		1	2	3	4	5	6	0	8	9	10	0	12	13	14	0	16	0	0	0	0	21	22	0	0	25	26
2376	1	40	6	6	0	0	0	0	0	0	0	0	0	0	0	0	0	0	1		2	7-14 marzo		1	2	0	4	5	0	0	0	9	10	0	12	13	0	0	16	0	0	0	0	21	0	0	24	25	0
3656	0	63	6	5	0	0	0	0	0	0	0	0	0	0	0	0	0	0	1		2	2-6 marzo		0	0	0	0	0	0	0	0	0	0	0	0	0	0	0	0	0	0	0	0	0	0	0	0	0	0
1050	1	40	6	6	0	0	0	0	0	0	0	0	0	0	0	0	0	0	1		2	7-14 marzo		1	2	3	4	5	6	0	0	9	10	11	12	13	14	0	16	0	0	0	0	21	22	0	24	25	26
809	0	52	6	5	0	0	0	0	0	0	0	0	0	0	0	0	0	0	1		2	dopo il 14 marzo		1	2	3	4	5	6	7	0	9	10	11	12	13	14	15	16	0	0	0	0	21	0	0	24	25	26
84	0	56	6	6	0	0	0	0	0	0	0	0	0	0	0	0	0	0	1		2	21-23 febbraio		0	0	0	0	0	0	0	0	0	0	0	0	0	0	0	0	0	0	0	0	0	0	0	0	0	0
1128	0	64	6	6	0	0	0	0	0	0	0	0	0	0	0	0	0	0	1		2	7-14 marzo		1	2	3	4	5	6	0	0	9	10	11	12	13	14	0	16	0	0	0	0	21	22	0	0	25	26
951	0	30	6	6	0	0	0	0	0	0	0	0	0	0	0	0	0	0	1		2	24 febbraio - 1 marzo		1	2	3	4	5	6	0	0	9	10	0	12	13	14	0	16	0	0	0	0	21	0	0	24	25	26
2368	0	64	6	6	0	0	0	0	0	0	0	0	0	0	0	0	0	0	1		2	7-14 marzo		1	2	3	0	0	6	0	0	0	10	0	12	13	14	0	16	0	0	0	0	21	22	0	24	25	26
1289	0	45	6	6	0	0	0	0	0	0	0	0	0	0	0	0	0	0	1		2	24 febbraio - 1 marzo		1	2	3	4	5	6	7	8	9	10	11	12	13	0	15	0	0	18	0	0	21	0	23	0	25	26
1113	0	58	6	8	0	0	0	0	0	0	0	0	0	0	0	0	0	0	1		2	2-6 marzo		1	2	0	4	5	0	0	0	0	10	11	12	13	14	0	16	0	0	0	0	21	0	0	24	25	26
1663	0	66	6	6	1	0	3	0	0	0	0	0	9	10	0	0	0	0	1		2	7-14 marzo		0	2	0	0	0	6	7	0	0	10	0	12	13	0	0	16	0	0	0	0	0	0	0	24	25	26
952	0	64	6	6	0	0	0	0	0	0	0	0	0	0	0	0	0	0	1		2	24 febbraio - 1 marzo		0	0	0	0	0	0	0	0	0	0	0	0	0	0	0	0	0	0	0	0	0	0	0	0	0	0
2473	0	52	6	6	0	0	0	0	0	0	0	0	0	0	0	0	0	0	1		2	24 febbraio - 1 marzo		1	2	3	4	5	6	7	8	9	10	11	12	13	14	15	0	17	0	0	0	21	0	0	24	25	26
3417	1	70	6	6	0	0	0	0	0	0	0	0	0	0	0	0	0	0	1		2	24 febbraio - 1 marzo		0	0	0	0	0	0	0	0	0	0	0	0	0	0	0	0	0	0	0	0	0	0	0	0	0	0
816	0	44	5	5	0	0	0	0	0	0	0	0	0	0	0	0	0	0	1		2	7-14 marzo		1	2	3	4	5	6	0	0	9	10	11	12	13	14	0	0	0	0	0	20	0	0	0	24	25	26
3092	1	30	5	5	0	0	0	0	0	0	0	0	0	0	0	0	0	0	1		2	7-14 marzo		1	2	0	4	5	6	0	0	9	10	0	12	13	0	0	0	0	0	0	0	21	0	0	24	25	26
255	0	58	5	5	0	0	0	0	0	0	0	0	0	0	0	0	0	0	1		2	2-6 marzo		0	0	0	0	0	0	0	0	0	0	0	0	0	0	0	0	0	0	0	0	0	0	0	0	0	0
1829	0	66	5	5	0	0	0	0	0	0	0	0	0	0	0	0	0	0	1		2	24 febbraio - 1 marzo		1	2	3	4	5	6	7	8	9	10	11	12	13	14	15	16	17	0	0	0	21	0	23	24	25	0
1024	0	64	5	2	0	0	0	0	0	0	0	0	0	0	0	0	0	0	1		2	2-6 marzo		1	2	0	4	5	6	0	0	9	10	11	12	0	0	0	16	0	0	0	0	21	0	0	24	25	26
1680	1	43	5	5	0	0	0	0	0	0	0	0	0	0	0	0	0	0	1		2	7-14 marzo		1	2	3	4	5	6	0	0	9	10	0	12	13	14	15	0	0	0	0	0	21	0	0	24	25	0
1019	0	53	5	5	0	0	0	0	0	0	0	0	0	0	0	0	0	0			2	24 febbraio - 1 marzo		1	2	3	4	5	6	7	8	9	10	11	12	13	14	15	16	17	18	19	0	21	22	23	0	25	0
586	0	63	5	5	0	0	0	0	0	0	0	0	0	0	0	0	0	0	1		2	2-6 marzo		1	0	3	4	5	6	0	0	0	0	0	0	0	14	0	0	0	0	0	0	0	0	0	24	25	26
1945	0	60	5	5	0	0	0	0	0	0	0	0	0	0	0	0	0	0	1		2	2-6 marzo		1	2	0	4	5	6	0	0	0	10	0	12	0	14	0	0	0	0	0	0	21	22	0	24	25	26
1595	0	62	5	5	0	0	0	0	0	0	0	0	0	0	0	0	0	0	1		2	7-14 marzo		0	2	0	0	0	6	0	0	9	0	0	12	13	14	0	0	0	0	0	20	0	0	0	24	25	26
487	0	55	5	5	0	0	0	0	0	0	0	0	0	0	0	0	0	0	1		2	2-6 marzo		1	2	0	4	5	6	0	0	0	10	11	12	13	0	0	16	0	0	0	0	21	0	0	24	25	26
1699	0	45	5	5	1	2	0	0	0	6	0	0	9	10	0	12	0	0	1		2	7-14 marzo		1	2	3	4	5	6	0	8	9	10	0	12	13	14	15	0	0	18	0	0	21	22	23	0	25	26
3731	0	61	5	5	0	0	0	0	0	0	0	0	0	0	0	0	0	0	1		2	2-6 marzo		1	2	3	4	5	6	0	8	9	10	0	12	13	14	15	16	0	0	0	0	21	0	23	24	25	26
3251	0	56	5	5	0	0	0	0	0	0	0	0	0	0	0	0	0	0	1		2	7-14 marzo		0	0	0	0	0	0	0	0	0	0	0	0	0	0	0	0	0	0	0	0	0	0	0	0	0	0
449	0	60	5	5	1	0	3	0	0	6	0	0	0	0	0	0	0	14	1		2	2-6 marzo		1	2	3	4	5	6	7	8	9	10	11	12	13	14	0	16	0	0	0	0	21	0	0	24	25	26
1959	0	67	5	5	0	0	0	0	0	0	0	0	0	0	0	0	0	0	1		2	7-14 marzo		1	0	0	4	5	6	7	0	9	10	11	12	13	0	15	16	0	0	0	0	21	0	0	24	25	26
206	0	64	5	5	0	0	0	0	0	0	0	0	0	0	0	0	0	0	1		2	dopo il 14 marzo		1	2	3	4	5	6	0	0	9	10	11	12	0	14	0	16	0	0	0	0	21	22	0	24	25	26
3167	0	63	5	5	0	0	0	0	0	0	0	0	0	0	0	0	0	0	1		2	7-14 marzo		1	2	3	4	5	6	0	0	0	10	0	12	0	14	0	0	0	0	0	20	21	0	0	24	0	26
2719	0	65	5	2	0	0	0	0	0	0	0	0	0	0	0	0	0	0	1		2	24 febbraio - 1 marzo		1	2	0	4	5	6	7	0	0	0	0	12	13	14	0	16	0	0	0	20	21	22	0	0	25	26
451	1	50	5	5	0	0	0	0	0	0	0	0	0	0	0	0	0	0	1		2	7-14 marzo		1	2	3	4	5	6	0	0	9	10	0	12	13	14	0	16	0	0	0	0	21	22	0	0	25	26
2516	1	31	5	5	0	0	0	0	0	0	0	0	0	0	0	0	0	0	1		2	7-14 marzo		0	0	0	0	0	0	0	0	0	0	0	0	0	0	0	0	0	0	0	0	0	0	0	0	0	0
2901	0	60	5	5	0	0	0	0	0	0	0	0	0	0	0	0	0	0	1		2	7-14 marzo		1	2	3	4	5	6	0	0	9	10	11	12	13	14	15	16	0	0	0	0	21	0	0	24	25	26
677	0	62	5	5	0	0	0	0	0	0	0	0	0	0	0	0	0	0	1		2	21-23 febbraio		1	2	3	4	5	6	0	0	9	10	0	12	13	0	15	0	0	0	0	0	21	22	0	0	0	26
44	1	42	5	5	0	0	0	0	0	0	0	0	0	0	0	0	0	0	1		2	7-14 marzo		1	2	3	4	5	6	0	8	9	10	0	12	13	14	0	0	17	0	0	0	21	22	0	24	25	26
1295	1	56	2	2	1	2	0	0	0	0	7	0	0	0	0	0	0	0	1		2	7-14 marzo		1	2	3	4	5	6	0	0	9	10	11	12	13	14	0	16	0	0	0	0	21	22	0	24	25	26
118	0	35	2	2	1	2	3	0	0	0	0	0	0	0	0	0	0	0	1		2	7-14 marzo		1	2	3	4	5	6	0	0	9	10	11	12	13	14	0	16	0	0	0	0	21	22	0	24	25	26
686	0	67	2	2	0	0	0	0	0	0	0	0	0	0	0	0	0	0	1		2	24 febbraio - 1 marzo		1	0	0	0	0	6	0	0	0	0	0	12	13	0	0	0	0	0	0	0	0	0	23	0	0	26
1531	1	46	2	2	0	0	0	0	0	0	0	0	0	0	0	0	0	0	1		2	7-14 marzo		1	2	3	4	5	6	0	0	9	10	0	12	13	14	0	16	0	0	0	0	21	22	0	0	25	26
1750	0	61	11	11	0	0	0	0	0	0	0	0	0	0	0	0	0	0	1		2	21-23 febbraio		0	0	0	0	0	0	0	0	0	0	0	0	0	0	0	0	0	0	0	0	0	0	0	0	0	0
1579	0	57	11	11	0	0	0	0	0	0	0	0	0	0	0	0	0	0	1		2	2-6 marzo		1	2	0	0	0	6	0	0	0	10	0	12	0	14	0	0	0	0	0	0	21	0	0	24	25	26
1181	0	30	11	11	1	0	3	4	0	6	0	8	9	0	0	12	13	0	1		2	7-14 marzo		1	2	3	0	0	6	0	0	9	10	0	12	13	14	0	16	0	0	0	0	21	0	0	24	25	0
2739	0	54	11	11	0	0	0	0	0	0	0	0	0	0	0	0	0	0	1		2	7-14 marzo		1	2	3	4	5	0	0	0	9	0	11	12	13	0	0	16	0	0	0	0	21	22	0	24	25	26
1777	0	62	11	11	0	0	0	0	0	0	0	0	0	0	0	0	0	0	1		2	dopo il 14 marzo		0	2	0	4	0	0	0	0	9	10	0	12	0	14	0	16	0	0	0	0	21	0	23	0	25	26
3197	0	65	9	9	0	0	0	0	0	0	0	0	0	0	0	0	0	0	1		2	21-23 febbraio		1	2	3	4	5	6	7	8	9	10	11	12	13	14	0	16	0	0	0	0	21	22	0	24	25	26
2194	0	66	9	9	0	0	0	0	0	0	0	0	0	0	0	0	0	0	1		2	21-23 febbraio		1	2	3	4	5	6	7	8	9	10	11	12	13	14	0	16	0	0	0	0	21	0	23	0	0	26
1821	1	59	9	9	0	0	0	0	0	0	0	0	0	0	0	0	0	0	1		2	7-14 marzo		1	2	3	4	5	0	0	0	9	0	0	12	13	0	0	16	0	0	0	0	21	0	0	24	25	26
3057	1	52	9	9	0	0	0	0	0	0	0	0	0	0	0	0	0	0	1		2	7-14 marzo		0	0	0	0	0	0	0	0	0	0	0	0	0	0	0	0	0	0	0	0	0	0	0	0	0	0
3001	0	57	9	9	0	0	0	0	0	0	0	0	0	0	0	0	0	0	1		2	7-14 marzo		1	2	0	4	5	6	0	0	0	10	0	12	13	0	15	16	0	0	0	0	21	22	0	0	25	26
3634	0	58	9	9	0	0	0	0	0	0	0	0	0	0	0	0	0	0	1		2	2-6 marzo		1	2	0	4	5	6	7	8	9	10	0	12	13	0	0	16	0	0	0	0	21	22	0	0	25	26
605	0	64	9	13	0	0	0	0	0	0	0	0	0	0	0	0	0	0	1		2	24 febbraio - 1 marzo		0	2	3	4	0	6	0	0	9	10	0	12	13	14	0	0	17	0	0	0	0	22	0	0	25	26
796	0	62	9	9	1	0	3	0	5	0	0	0	0	0	11	0	0	14	1		2	2-6 marzo		1	2	3	4	5	6	0	0	9	10	0	12	13	14	0	16	0	0	0	0	21	0	0	24	25	26
1727	0	68	9	1	1	2	0	0	0	6	0	8	0	0	0	0	0	0	1		2	2-6 marzo		1	2	0	4	5	6	0	0	9	10	11	12	13	14	0	0	17	0	0	0	21	22	0	24	25	26
225	0	55	13	8	0	0	0	0	0	0	0	0	0	0	0	0	0	0	1		2	7-14 marzo		1	2	3	4	5	6	7	0	0	10	11	12	13	0	0	0	0	0	0	0	21	22	0	0	25	26
3456	0	53	12	12	1	0	0	0	0	6	7	0	9	10	0	0	0	0	1		2	7-14 marzo		1	2	3	4	5	6	0	8	0	10	11	12	13	14	0	16	0	0	0	0	21	0	0	24	25	26
1362	0	64		1	0	0	0	0	0	0	0	0	0	0	0	0	0	0	1		2	7-14 marzo		1	2	0	4	0	6	0	0	0	10	11	0	0	0	0	0	0	0	0	0	0	22	0	0	25	26
990	0	47		6	0	0	0	0	0	0	0	0	0	0	0	0	0	0	1		2	7-14 marzo		1	2	0	4	5	6	0	0	9	10	0	12	13	14	15	0	0	0	0	0	21	0	0	24	25	26
1505	1	50			0	0	0	0	0	0	0	0	0	0	0	0	0	0	1		2	2-6 marzo		1	2	3	4	5	0	0	0	9	10	11	12	13	14	0	0	0	18	0	0	0	0	0	24	25	26
220	0	60			0	0	0	0	0	0	0	0	0	0	0	0	0	0	1		2	7-14 marzo		1	2	3	4	5	6	0	0	9	10	11	12	13	14	0	0	17	0	0	0	21	0	0	24	25	26
53	0	63			0	0	0	0	0	0	0	0	0	0	0	0	0	0	1		2	7-14 marzo		0	0	0	0	0	0	0	0	0	0	0	0	0	0	0	0	0	0	0	0	0	0	0	0	0	0
148	0	64			0	0	0	0	0	0	0	0	0	0	0	0	0	0	1		2	2-6 marzo		1	2	3	4	5	6	7	0	9	10	11	12	0	14	0	16	0	0	0	0	21	0	0	24	25	26
29	0	66			0	0	0	0	0	0	0	0	0	0	0	0	0	0	1		2	24 febbraio - 1 marzo		1	2	3	4	5	6	0	0	9	10	0	12	13	14	0	16	0	0	0	0	21	22	23	0	25	26
3586	0	67			0	0	0	0	0	0	0	0	0	0	0	0	0	0	1		2	7-14 marzo		1	2	3	4	5	6	7	8	9	10	11	12	13	14	15	0	17	0	0	0	21	0	23	0	25	26
2063	0	71			0	0	0	0	0	0	0	0	0	0	0	0	0	0	1		2	7-14 marzo		0	2	0	4	5	6	0	0	0	0	0	12	13	14	15	0	0	0	0	20	21	22	0	0	25	26
1278	1				0	0	0	0	0	0	0	0	0	0	0	0	0	0	2		2	7-14 marzo		1	2	0	4	5	6	7	8	9	10	0	12	13	0	0	16	0	0	0	0	21	22	23	0	25	26
263	0				0	0	0	0	0	0	0	0	0	0	0	0	0	0	1		2	dopo il 14 marzo		0	2	0	4	5	6	0	0	9	10	11	12	13	14	0	16	17	0	0	0	21	22	0	0	25	26
1450					0	0	0	0	0	0	0	0	0	0	0	0	0	0	1		2	24 febbraio - 1 marzo		0	0	0	0	0	0	0	0	0	0	0	0	0	0	0	0	0	0	0	0	0	0	0	0	0	0
1557	0	65	1	1	0	0	0	0	0	0	0	0	0	0	0	0	0	0	1	0	1		2-6 marzo	0	0	0	0	5	6	0	0	9	10	0	12	0	0	0	16	0	0	0	0	0	22	23	0	25	0
1299	0	32	1	1	0	0	0	0	0	0	0	0	0	0	0	0	0	0	1	0	1		7-14 marzo	1	2	3	4	5	6	0	0	9	10	0	12	13	0	0	0	0	18	19	0	21	22	23	24	25	26
1374	0	31	1	1	0	0	0	0	0	0	0	0	0	0	0	0	0	0	1	0	1		7-14 marzo	1	2	3	0	5	0	0	0	9	0	0	12	13	14	0	0	0	0	0	0	0	22	0	24	25	26
2111	0	56	1	1	0	0	0	0	0	0	0	0	0	0	0	0	0	0	2	0	1		7-14 marzo	1	2	0	4	5	6	0	0	9	10	11	12	13	14	15	0	0	0	0	0	21	22	23	0	25	26
2172	0	38	1	1	0	0	0	0	0	0	0	0	0	0	0	0	0	0	1	0	1		7-14 marzo	0	0	0	4	0	0	0	0	9	10	11	12	0	0	15	0	0	0	0	0	21	0	0	24	25	0
2247	0		1	1	0	0	0	0	0	0	0	0	0	0	0	0	0	0	1	0	1		2-6 marzo	1	2	3	4	0	0	0	0	9	10	11	12	13	14	15	0	0	0	0	0	21	0	0	24	25	26
2170	0	43	1	1	0	0	0	0	0	0	0	0	0	0	0	0	0	0	1	0	1		7-14 marzo	0	0	0	4	5	0	0	0	9	10	11	12	0	0	15	0	0	0	0	0	21	0	0	24	25	0
2992	1	27	1	1	1	2	3	4	0	6	7	0	9	0	0	0	13	0	1	0	1		7-14 marzo	0	2	0	4	5	6	0	0	9	0	0	12	0	0	0	0	0	0	0	0	21	0	0	24	25	0
97	0	70	1	1	1	2	0	4	0	0	7	8	9	0	0	0	0	0	1	0	1		24 febbraio - 1 marzo	0	2	3	4	5	6	0	0	0	10	0	12	0	0	0	16	0	0	0	20	0	0	23	0	25	26
3303	1	28	1	1	1	0	0	4	0	6	0	0	0	10	11	0	0	0	2	0	1		7-14 marzo	0	2	0	4	5	6	0	0	0	10	0	12	13	14	0	0	0	0	0	0	21	0	0	24	25	26
2245	0	62	1	1	1	0	3	0	5	0	0	0	9	0	0	0	0	0	2	0	1		21-23 febbraio	0	0	0	0	0	0	0	0	0	0	0	0	0	0	0	0	0	0	0	0	0	0	0	0	0	0
2395	1	52	1	1	0	0	0	0	0	0	0	0	0	0	0	0	0	0	1	0	1	7-14 marzo	7-14 marzo	1	2	3	4	5	6	0	0	9	10	0	12	13	14	0	16	17	0	0	0	21	0	23	24	25	26
2557	1	30	1	1	1	2	3	0	0	0	7	0	0	0	0	0	0	0	1	0	1		7-14 marzo	1	2	0	0	0	6	0	0	9	10	0	0	13	0	0	16	0	0	0	0	0	0	0	24	25	0
311	0	47	1	1	0	0	0	0	0	0	0	0	0	0	0	0	0	0	1	0	1		2-6 marzo	0	0	0	0	0	0	0	0	0	0	0	0	0	0	0	0	0	0	0	0	0	0	0	0	0	0
836	1	48	1	1	0	0	0	0	0	0	0	0	0	0	0	0	0	0	2	0	1		2-6 marzo	1	2	3	4	5	6	0	0	9	10	0	12	13	0	0	0	0	18	0	0	21	22	0	0	25	26
1817	1	49	1	1	0	0	0	0	0	0	0	0	0	0	0	0	0	0	1	0	1		2-6 marzo	0	0	0	0	0	0	0	0	0	0	0	0	0	0	0	0	0	0	0	0	0	0	0	0	0	0
2391	0	28	1	1	0	0	0	0	0	0	0	0	0	0	0	0	0	0	1	0	1		2-6 marzo	1	0	0	0	5	0	0	0	9	0	0	12	0	14	0	16	0	0	0	0	0	0	0	24	25	26
2872	1	63	1	1	0	0	0	0	0	0	0	0	0	0	0	0	0	0	1	0	1		7-14 marzo	0	0	0	0	0	0	0	0	0	0	0	0	0	0	0	0	0	0	0	0	0	0	0	0	0	0
2942	0	61	1	1	0	0	0	0	0	0	0	0	0	0	0	0	0	0	1	0	1		7-14 marzo	0	2	0	0	0	6	0	0	9	10	0	0	0	0	15	0	0	0	0	0	0	0	23	0	25	26
318	1	25	1	1	0	0	0	0	0	0	0	0	0	0	0	0	0	0	1	0	1		7-14 marzo	0	0	3	4	5	6	0	0	9	10	0	12	0	0	0	0	0	0	0	0	21	0	0	24	25	0
3415	0	30	1	1	0	0	0	0	0	0	0	0	0	0	0	0	0	0	1	0	1		2-6 marzo	1	2	3	4	5	6	7	8	9	10	0	12	0	14	0	0	0	18	0	0	21	22	0	0	25	26
2420	1	60	1	1	0	0	0	0	0	0	0	0	0	0	0	0	0	0	1	0	1		2-6 marzo	1	2	3	0	5	6	7	8	9	10	0	12	13	14	15	0	0	0	0	0	21	0	23	0	25	26
3285	1	53	1	1	0	0	0	0	0	0	0	0	0	0	0	0	0	0	2	0	1		24 febbraio - 1 marzo	0	2	3	0	0	6	0	0	0	10	11	12	0	0	0	16	0	0	0	0	21	0	0	24	25	26
1121	0	40	1	1	0	0	0	0	0	0	0	0	0	0	0	0	0	0	2	0	1		7-14 marzo	0	2	0	0	0	0	0	0	9	0	0	0	0	0	0	16	0	0	0	0	0	0	0	24	25	0
493	1	27	1	1	1	2	3	0	0	6	7	8	9	0	0	12	13	0	1	0	1		7-14 marzo	1	0	0	4	5	6	7	8	9	10	0	12	13	0	0	16	0	0	0	0	21	22	0	0	25	26
844	1	49	1	1	1	2	3	4	5	0	7	0	0	10	11	0	0	0	3	0	1		7-14 marzo	0	0	0	0	0	0	0	0	0	0	0	0	0	0	0	0	0	0	0	0	0	0	0	0	0	0
3074	0	40	1	1	1	2	3	4	5	6	7	8	9	10	0	0	0	0	1	0	1		21-23 febbraio	0	0	0	0	0	0	0	0	0	0	0	0	0	0	0	0	0	0	0	0	0	0	0	0	0	0
1190	0	39	1	1	1	0	3	4	0	6	0	0	9	0	0	0	0	14	1	0	1		2-6 marzo	0	0	0	0	0	0	0	0	0	0	0	0	0	0	0	0	0	0	0	0	0	0	0	0	0	0
3287	1	26	1	1	0	0	0	0	0	0	0	0	0	0	0	0	0	0	1	0	1		7-14 marzo	1	0	0	4	5	6	0	0	9	0	0	12	13	0	0	0	0	0	0	0	21	22	0	0	25	26
2749	0	69	1	1	0	0	0	0	0	0	0	0	0	0	0	0	0	0	1	0	1		2-6 marzo	1	0	3	0	5	6	0	0	0	0	0	0	0	0	0	0	0	0	0	0	21	0	0	24	25	26
488	1	59	1	1	0	0	0	0	0	0	0	0	0	0	0	0	0	0	1	0	1		2-6 marzo	1	2	3	4	5	6	0	0	9	10	11	12	0	14	0	16	0	0	0	0	21	0	0	24	25	26
887	0	63	1	1	0	0	0	0	0	0	0	0	0	0	0	0	0	0	1	0	1		2-6 marzo	1	2	0	4	5	6	0	8	9	10	0	12	13	14	15	0	0	0	0	0	21	0	0	24	25	26
803	0	65	1	1	0	0	0	0	0	0	0	0	0	0	0	0	0	0	1	0	1		7-14 marzo	1	2	3	4	5	6	7	8	9	10	0	12	13	14	15	0	0	0	0	0	21	22	0	24	25	26
1355	0	35	1	1	0	0	0	0	0	0	0	0	0	0	0	0	0	0	1	0	1		7-14 marzo	0	0	0	0	0	0	0	0	0	0	0	0	0	0	0	0	0	0	0	0	0	0	0	0	0	0
880	0	68	1	1	0	0	0	0	0	0	0	0	0	0	0	0	0	0	2	0	1		2-6 marzo	1	2	3	4	5	6	7	8	9	10	11	12	13	14	15	16	0	0	0	0	21	22	0	0	25	26
2251	1	40	1	1	1	2	0	0	0	0	0	0	0	0	11	12	13	0	1	0	1		7-14 marzo	1	2	0	4	5	6	0	0	9	10	0	0	0	0	15	16	0	0	0	0	21	0	0	0	25	26
1705	1	64	1	1	1	0	3	4	0	0	7	0	0	10	0	0	0	0	3	0	1		7-14 marzo	1	0	0	0	0	0	0	0	0	0	0	0	0	0	0	0	0	0	0	0	0	0	0	0	0	0
845	0	47	1	1	0	0	0	0	0	0	0	0	0	0	0	0	0	0	2	0	1		2-6 marzo	0	2	3	4	5	6	7	8	0	10	11	12	13	0	0	16	0	0	0	0	21	22	0	0	25	0
2889	0	64	1	1	0	0	0	0	0	0	0	0	0	0	0	0	0	0	1	0	1		2-6 marzo	1	2	0	4	5	6	0	0	9	10	0	12	13	14	15	0	0	0	0	0	21	22	0	0	25	0
3156	0	35	1	1	1	2	3	4	5	6	7	8	9	10	11	12	13	14	1	0	1		7-14 marzo	1	2	0	0	0	6	7	8	9	10	0	12	0	14	0	0	0	0	0	0	0	0	0	24	25	26
256	0	48	1	1	1	2	3	4	0	6	7	0	9	0	11	0	0	14	1	0	1		21-23 febbraio	1	2	3	4	5	6	7	8	9	10	0	12	0	0	15	0	0	0	0	0	0	22	0	0	25	26
1025	0	33	1	1	0	0	0	0	0	0	0	0	0	0	0	0	0	0	1	0	1		2-6 marzo	1	2	3	4	5	6	7	8	9	10	0	0	13	14	15	16	17	0	0	0	21	22	0	0	25	26
3604	0	38	1	1	1	2	3	4	0	6	7	8	9	0	0	12	13	0	1	0	1		Dopo il 15 marzo	1	2	3	4	5	6	7	8	0	10	0	12	13	14	0	16	17	0	0	0	21	0	0	24	25	26
1044	0	45	1	1	0	0	0	0	0	0	0	0	0	0	0	0	0	0	2	0	1		2-6 marzo	1	2	0	0	0	0	0	0	9	10	0	12	13	14	0	0	0	18	0	0	0	0	0	24	25	0
3635	0	62	1	1	0	0	0	0	0	0	0	0	0	0	0	0	0	0	2	0	1		7-14 marzo	1	2	3	4	5	6	0	0	0	10	0	12	13	14	0	16	0	0	0	0	21	22	23	0	25	26
104	1	66	1	1	0	0	0	0	0	0	0	0	0	0	0	0	0	0	2	0	1		Dopo il 15 marzo	0	0	0	0	0	0	0	0	0	0	0	0	0	0	0	0	0	0	0	0	0	0	0	0	0	0
1323	0	25	1	1	0	0	0	0	0	0	0	0	0	0	0	0	0	0	1	0	1		24 febbraio - 1 marzo	1	0	0	0	0	0	0	0	0	0	0	0	0	0	0	0	0	0	0	0	0	0	0	0	0	0
1246	1	52	1	1	0	0	0	0	0	0	0	0	0	0	0	0	0	0	1	0	1		2-6 marzo	1	2	3	4	5	6	7	8	9	0	11	12	13	14	15	0	17	0	0	0	0	22	23	0	25	26
2087	0	69	1	1	0	0	0	0	0	0	0	0	0	0	0	0	0	0	1	0	1		7-14 marzo	1	0	0	0	5	6	0	0	9	0	0	0	0	0	0	16	0	0	0	0	0	22	23	24	25	0
2514	0	28	1	1	0	0	0	0	0	0	0	0	0	0	0	0	0	0	2	0	1		24 febbraio - 1 marzo	1	2	3	4	5	6	0	0	9	10	0	12	13	14	15	0	0	0	0	0	21	22	0	24	25	26
2396	0	34	1	1	0	0	0	0	0	0	0	0	0	0	0	0	0	0	1	0	1		7-14 marzo	0	0	0	0	0	0	0	0	0	0	0	0	0	0	0	0	0	0	0	0	0	0	0	0	0	0
3460	1	64	1	1	0	0	0	0	0	0	0	0	0	0	0	0	0	0	1	0	1		24 febbraio - 1 marzo	1	2	0	0	0	6	7	8	9	10	0	12	13	14	15	0	0	0	0	0	0	0	0	0	0	0
1761	0	62	1	1	0	0	0	0	0	0	0	0	0	0	0	0	0	0	1	0	1		Dopo il 15 marzo	1	2	3	4	5	0	0	0	9	10	0	12	13	14	15	16	0	0	0	0	21	0	0	24	25	26
3748	1	59	1	1	1	2	0	0	0	0	0	0	0	0	0	0	0	0	1	0	1		Dopo il 15 marzo	0	0	0	0	0	0	0	0	0	0	0	0	0	0	0	0	0	0	0	0	0	0	0	0	0	0
2644	1	61	1	1	0	0	0	0	0	0	0	0	0	0	0	0	0	0	1	0	1		7-14 marzo	1	2	0	4	5	6	7	0	9	10	0	12	13	14	0	16	0	0	0	0	21	0	0	24	25	26
1538	1	59	1	1	0	0	0	0	0	0	0	0	0	0	0	0	0	0	3	0	1		24 febbraio - 1 marzo	1	0	0	0	0	0	0	0	0	0	0	0	0	0	0	0	0	0	0	0	0	0	0	0	0	0
164	0	58	1	1	1	2	0	4	0	0	0	0	0	10	0	0	0	0	2	0	1		7-14 marzo	1	2	3	4	5	6	0	0	9	10	0	12	13	14	0	16	0	0	0	0	21	0	0	24	25	26
1258	0	29	1	1	0	0	0	0	0	0	0	0	0	0	0	0	0	0	1	0	1		24 febbraio - 1 marzo	0	2	3	4	5	6	0	0	9	10	11	12	13	14	15	16	0	0	0	20	21	22	23	24	25	26
539	1	30	1	1	0	0	0	0	0	0	0	0	0	0	0	0	0	0	1	0	1		7-14 marzo	0	0	3	4	5	6	0	0	9	10	0	12	0	0	0	0	0	0	0	0	21	22	0	24	25	26
1061	0	30	1	1	1	2	0	4	0	0	0	0	0	0	11	0	0	0	2	0	1		7-14 marzo	0	0	0	0	5	6	0	0	9	0	0	0	0	14	0	0	0	0	0	0	0	0	0	24	25	26
3101	0	25	1	1	0	0	0	0	0	0	0	0	0	0	0	0	0	0	2	0	1		7-14 marzo	0	0	0	0	0	0	0	0	0	0	0	0	0	0	0	0	0	0	0	0	0	0	0	0	0	0
2852	1	58	1	1	0	0	0	0	0	0	0	0	0	0	0	0	0	0	2	0	1		7-14 marzo	1	2	3	4	5	6	7	8	9	10	11	12	13	14	15	0	0	0	0	0	21	0	0	24	25	26
1220	1	60	1	1	1	2	0	4	0	0	0	0	0	10	0	0	0	0	1	0	1		2-6 marzo	0	0	0	0	0	0	0	0	0	0	0	0	0	0	0	0	0	0	0	0	0	0	0	0	0	0
80	1	47	1	1	0	0	0	0	0	0	0	0	0	0	0	0	0	0	1	0	1		2-6 marzo	1	2	3	4	5	6	0	0	9	10	11	12	13	14	15	0	0	0	0	0	21	22	0	0	25	26
3227	0	56	1	1	1	0	0	0	0	0	0	0	9	0	0	0	0	0	2	0	1		21-23 febbraio	1	2	3	4	0	6	0	0	9	10	11	12	13	0	0	16	0	0	0	0	21	22	23	0	25	26
3732	0	33	1	1	0	0	0	0	0	0	0	0	0	0	0	0	0	0	1	0	1		2-6 marzo	1	2	3	4	5	6	0	0	9	10	11	12	13	14	15	0	0	0	0	20	21	22	0	0	25	0
90	1	29	1	1	0	0	0	0	0	0	0	0	0	0	0	0	0	0	1	0	1		Dopo il 15 marzo	1	2	3	4	5	6	7	8	0	10	0	12	13	0	0	16	0	0	0	0	21	0	23	0	25	26
18	1	42	1	1	0	0	0	0	0	0	0	0	0	0	0	0	0	0	2	0	1		7-14 marzo	1	2	0	4	5	0	0	0	9	0	11	12	13	14	0	0	0	0	0	0	21	22	0	0	25	0
2007	1	50	1	1	0	0	0	0	0	0	0	0	0	0	0	0	0	0	1	0	1		21-23 febbraio	0	0	0	0	0	0	0	0	0	0	0	0	0	0	0	0	0	0	0	0	0	0	0	0	0	0
38	1	38	1	1	1	2	0	0	0	6	7	0	9	0	0	12	13	0	1	0	1		7-14 marzo	0	2	0	4	5	6	0	0	0	10	0	12	13	14	0	0	0	0	0	0	21	22	0	24	25	26
1309	0	65	1	1	1	2	3	4	0	0	0	0	9	0	11	12	0	0	1	0	1		24 febbraio - 1 marzo	1	0	3	4	5	6	0	8	0	10	0	12	13	14	0	16	0	0	0	0	21	22	0	0	25	26
1639	0	53	1	1	0	0	0	0	0	0	0	0	0	0	0	0	0	0	1	0	1		7-14 marzo	1	2	3	4	5	6	7	8	9	10	0	12	13	14	0	0	0	18	0	0	21	22	0	0	25	26
2248	1	50	1	1	0	0	0	0	0	0	0	0	0	0	0	0	0	0	1	0	1		7-14 marzo	1	2	3	4	5	6	0	0	9	10	11	12	13	14	0	16	0	0	0	0	21	22	0	0	25	26
1035	1	40	1	1	0	0	0	0	0	0	0	0	0	0	0	0	0	0	1	0	1		7-14 marzo	1	2	3	4	5	6	0	0	9	10	11	12	13	14	15	0	0	0	0	0	21	22	0	0	25	26
1272	0	63	1	1	0	0	0	0	0	0	0	0	0	0	0	0	0	0	1	0	1		2-6 marzo	1	2	3	4	5	6	0	0	9	10	0	12	13	14	15	0	0	18	0	0	21	22	0	24	25	26
3226	1	31	1	1	0	0	0	0	0	0	0	0	0	0	0	0	0	0	1	0	1		2-6 marzo	1	0	0	4	5	6	0	0	0	10	0	12	0	0	0	16	0	0	0	0	21	0	0	24	25	0
549	0	56	1	1	0	0	0	0	0	0	0	0	0	0	0	0	0	0	2	0	1		21-23 febbraio	0	0	0	0	0	0	0	0	0	0	0	0	0	0	0	0	0	0	0	0	0	0	0	0	0	0
223	0	53	1	1	0	0	0	0	0	0	0	0	0	0	0	0	0	0	1	0	1		7-14 marzo	0	0	0	0	0	0	0	0	0	0	0	0	0	0	0	0	0	0	0	0	0	0	0	0	0	0
775	0	69	1	1	0	0	0	0	0	0	0	0	0	0	0	0	0	0	1	0	1		21-23 febbraio	1	2	3	4	5	6	0	8	9	10	0	12	13	14	0	0	17	0	0	20	21	22	0	24	25	26
3703	0	67	1	1	0	0	0	0	0	0	0	0	0	0	0	0	0	0	1	0	1		21-23 febbraio	0	0	0	0	0	0	0	0	0	0	0	0	0	0	0	0	0	0	0	0	0	0	0	0	0	0
2874	0	39	1	3	0	0	0	0	0	0	0	0	0	0	0	0	0	0	2	0	1		7-14 marzo	1	2	3	4	5	6	0	0	9	10	11	12	13	14	0	16	0	0	0	0	21	0	0	24	25	26
1273	0	52	1	4	0	0	0	0	0	0	0	0	0	0	0	0	0	0	1	0	1		24 febbraio - 1 marzo	1	0	3	4	5	6	0	0	9	10	11	12	13	14	15	0	0	0	0	0	21	22	0	0	25	26
3372	0	34	1	4	0	0	0	0	0	0	0	0	0	0	0	0	0	0	1	0	1		21-23 febbraio	0	0	0	0	0	0	0	0	0	0	0	0	0	0	0	0	0	0	0	0	0	0	0	0	0	0
1812	0	63	1	4	0	0	0	0	0	0	0	0	0	0	0	0	0	0	1	0	1			0	0	0	0	0	0	0	0	0	0	0	0	0	0	0	0	0	0	0	0	0	0	0	0	0	0
2520	0	57	1	6	1	2	3	4	0	0	7	0	0	10	0	12	13	0	1	0	1		24 febbraio - 1 marzo	1	2	3	4	0	6	0	0	0	10	0	12	0	0	0	16	0	0	0	0	21	0	0	0	25	26
1215	1	31	1	6	0	0	0	0	0	0	0	0	0	0	0	0	0	0	1	0	1		Dopo il 15 marzo	1	0	3	0	0	6	0	0	0	0	0	0	0	14	0	16	0	0	0	0	0	0	0	0	25	0
2314	0	33	1	6	0	0	0	0	0	0	0	0	0	0	0	0	0	0	1	0	1		7-14 marzo	1	2	3	4	5	6	7	8	9	10	0	12	0	0	15	16	0	0	0	0	21	22	0	0	25	26
2112	1	42	1	7	0	0	0	0	0	0	0	0	0	0	0	0	0	0	1	0	1		21-23 febbraio	0	0	0	0	0	0	0	0	0	0	0	0	0	0	0	0	0	0	0	0	0	0	0	0	0	0
2869	0	39	1	8	1	2	3	0	0	0	0	0	0	0	11	0	0	0	2	0	1		2-6 marzo	0	0	0	0	0	0	0	0	9	0	11	12	0	0	0	0	0	0	0	0	0	0	0	0	0	0
1896	0	70	1	8	0	0	0	0	0	0	0	0	0	0	0	0	0	0	1	0	1		2-6 marzo	1	2	3	4	5	6	0	0	0	10	0	12	13	14	15	16	0	0	0	0	21	0	0	24	25	26
899	1	26	1	9	0	0	0	0	0	0	0	0	0	0	0	0	0	0	2	0	1		7-14 marzo	1	2	3	4	5	6	0	0	9	10	11	12	13	14	15	0	0	0	0	0	21	22	0	24	25	26
2681	1	28	1	13	0	0	0	0	0	0	0	0	0	0	0	0	0	0	1	0	1		24 febbraio - 1 marzo	0	0	0	0	0	0	0	0	0	0	0	0	0	0	0	0	0	0	0	0	0	0	0	0	0	0
136	0	64	1	13	0	0	0	0	0	0	0	0	0	0	0	0	0	0	1	0	1		21-23 febbraio	0	0	0	0	0	0	0	0	0	0	0	0	0	0	0	0	0	0	0	0	0	0	0	0	0	0
3459	1	28	4	1	0	0	0	0	0	0	0	0	0	0	0	0	0	0	2	0	1		24 febbraio - 1 marzo	1	2	0	0	5	0	0	0	9	0	0	12	13	0	0	16	0	0	0	0	21	22	0	24	25	26
1985	0	38	4	1	0	0	0	0	0	0	0	0	0	0	0	0	0	0	1	0	1		2-6 marzo	1	2	0	0	5	6	0	0	9	10	0	12	13	14	0	16	0	0	0	0	21	0	0	24	25	26
1627	0	45	4	1	1	2	3	4	5	6	7	8	9	10	11	12	13	0	1	0	1		7-14 marzo	1	2	3	4	5	6	7	8	9	10	11	12	13	14	0	16	0	0	0	0	21	22	0	0	25	26
1135	1	32	4	1	1	2	3	0	0	0	0	0	0	0	0	0	0	0	1	0	1		2-6 marzo	1	0	0	4	5	6	7	8	9	10	0	12	13	0	0	16	0	0	0	0	21	0	23	0	25	26
2711	1	31	4	4	0	0	0	0	0	0	0	0	0	0	0	0	0	0	1	0	1		7-14 marzo	1	2	0	4	5	6	0	0	9	0	0	12	13	0	0	16	0	0	0	0	0	22	0	0	25	26
212	0	34	4	4	0	0	0	0	0	0	0	0	0	0	0	0	0	0	1	0	1		21-23 febbraio	1	2	3	4	5	6	7	8	9	10	11	12	13	14	0	16	0	0	0	0	21	0	0	24	25	26
2190	1	32	4	4	0	0	0	0	0	0	0	0	0	0	0	0	0	0	1	0	1		2-6 marzo	1	0	3	0	5	6	0	0	9	0	0	0	13	0	0	0	0	0	0	0	0	22	0	0	25	0
2243	1	26	4	4	0	0	0	0	0	0	0	0	0	0	0	0	0	0	1	0	1		24 febbraio - 1 marzo	1	2	0	4	5	6	0	0	9	10	0	12	13	0	15	0	0	0	0	0	21	22	0	0	25	0
3773	0	30	4	4	0	0	0	0	0	0	0	0	0	0	0	0	0	0	1	0	1		2-6 marzo	0	0	0	0	0	0	0	0	0	0	0	0	0	0	0	0	0	0	0	0	0	0	0	0	0	0
459	0	62	4	4	0	0	0	0	0	0	0	0	0	0	0	0	0	0	2	0	1		7-14 marzo	0	0	0	4	5	6	0	0	0	0	0	12	13	14	0	0	0	0	0	20	21	0	0	24	25	26
2384	0	40	4	4	0	0	0	0	0	0	0	0	0	0	0	0	0	0	1	0	1		24 febbraio - 1 marzo	1	2	3	4	5	6	0	0	9	10	11	12	13	14	0	16	0	0	0	0	21	0	0	24	25	26
1778	1	49	4	4	0	0	0	0	0	0	0	0	0	0	0	0	0	0	1	0	1		7-14 marzo	0	2	0	0	5	6	0	0	0	10	0	0	13	0	0	0	0	0	0	0	0	0	0	24	0	0
1591	0	59	4	4	0	0	0	0	0	0	0	0	0	0	0	0	0	0	2	0	1		7-14 marzo	1	0	0	4	5	6	0	0	9	10	0	12	13	14	0	16	0	0	0	0	21	0	0	24	25	26
3380	0	40	4	4	1	2	3	4	0	6	7	8	9	10	11	12	13	0	1	0	1		24 febbraio - 1 marzo	1	2	3	4	5	6	7	8	9	10	11	12	13	14	0	16	0	18	19	0	21	0	23	24	25	26
2506	1	27	4	4	0	0	0	0	0	0	0	0	0	0	0	0	0	0	1	0	1		7-14 marzo	1	0	0	4	0	6	0	0	9	0	0	12	13	14	0	0	17	0	0	0	21	0	23	0	25	26
2963	0	35	4	4	0	0	0	0	0	0	0	0	0	0	0	0	0	0	2	0	1		7-14 marzo	1	2	3	4	5	6	0	0	9	10	0	12	13	14	0	16	0	0	0	0	21	0	0	24	25	0
1332	0	44	4	4	0	0	0	0	0	0	0	0	0	0	0	0	0	0	1	0	1		2-6 marzo	0	2	3	4	5	6	7	0	9	10	0	12	0	0	0	16	0	0	0	0	0	22	0	0	25	26
1139	1	67	4	4	0	0	0	0	0	0	0	0	0	0	0	0	0	0	1	0	1		7-14 marzo	0	2	0	4	5	6	0	0	9	10	0	12	13	14	0	16	0	0	0	0	21	0	0	24	25	26
2680	0	26	4	4	0	0	0	0	0	0	0	0	0	0	0	0	0	0	2	0	1		7-14 marzo	1	2	3	4	0	6	0	0	9	10	11	12	0	0	15	0	0	0	0	0	21	0	0	24	25	26
1779	1	38	4	4	1	2	3	4	0	6	0	8	0	0	0	0	0	0	1	0	1		7-14 marzo	1	2	0	0	0	6	0	0	9	10	0	12	13	14	0	16	0	0	0	0	0	0	0	24	25	26
8	0	66	4		0	0	0	0	0	0	0	0	0	0	0	0	0	0	2	0	1		Dopo il 15 marzo	0	0	0	0	0	0	0	0	0	0	0	0	0	0	0	0	0	0	0	0	0	0	0	0	0	0
727	0	60	8	1	0	0	0	0	0	0	0	0	0	0	0	0	0	0	2	0	1		2-6 marzo	1	2	3	4	5	6	0	0	0	0	0	12	13	14	0	16	0	0	0	0	21	22	0	24	25	26
1447	1	58	8	1	0	0	0	0	0	0	0	0	0	0	0	0	0	0	2	0	1		7-14 marzo	1	2	0	4	5	6	0	0	9	10	0	12	13	14	0	16	0	0	0	0	21	0	0	24	25	26
1031	0	35	8	1	0	0	0	0	0	0	0	0	0	0	0	0	0	0	1	0	1		2-6 marzo	1	2	3	0	5	6	0	0	0	0	0	12	13	14	15	0	0	0	0	0	21	22	23	0	0	26
1257	0	61	8	1	1	2	3	4	5	6	0	0	0	0	0	12	13	0	1	0	1		2-6 marzo	0	0	0	0	0	0	0	0	0	0	0	0	0	0	0	0	0	0	0	0	0	0	0	0	0	0
429	1	30	8	3	0	0	0	0	0	0	0	0	0	0	0	0	0	0	1	0	1		7-14 marzo	1	2	0	4	5	6	0	0	9	10	11	0	13	0	0	0	17	0	0	0	0	22	0	24	25	26
1885	0	51	8	4	0	0	0	0	0	0	0	0	0	0	0	0	0	0	1	0	1		7-14 marzo	1	2	0	0	0	6	0	0	9	0	11	12	13	14	0	16	0	0	0	0	21	0	0	24	0	0
893	0	71	8	4	0	0	0	0	0	0	0	0	0	0	0	0	0	0		0	1		7-14 marzo	1	2	0	4	5	6	7	8	0	10	11	12	13	0	15	0	0	0	0	0	21	22	23	0	25	26
531	0	50	8	7	0	0	0	0	0	0	0	0	0	0	0	0	0	0	1	0	1		7-14 marzo	1	2	3	4	5	6	0	0	9	10	11	12	13	14	0	0	17	0	0	0	21	22	23	0	25	26
947	0	62	8	8	0	0	0	0	0	0	0	0	0	0	0	0	0	0	1	0	1		24 febbraio - 1 marzo	0	2	0	0	0	0	0	0	0	10	0	12	13	0	0	16	0	0	0	0	0	0	0	0	25	0
1022	1	59	8	8	0	0	0	0	0	0	0	0	0	0	0	0	0	0	2	0	1		2-6 marzo	1	2	0	0	5	6	0	0	0	10	0	0	0	0	15	0	0	0	0	0	21	0	0	24	25	26
975	1	59	8	8	0	0	0	0	0	0	0	0	0	0	0	0	0	0	1	0	1		7-14 marzo	1	2	3	4	5	6	0	0	9	10	0	12	13	14	0	16	0	0	0	0	21	0	23	0	25	26
557	0	50	8	8	0	0	0	0	0	0	0	0	0	0	0	0	0	0	1	0	1		21-23 febbraio	0	0	0	0	0	0	0	0	0	0	0	0	0	0	0	0	0	0	0	0	0	0	0	0	0	0
577	0	58	8	8	0	0	0	0	0	0	0	0	0	0	0	0	0	0	2	0	1		2-6 marzo	0	0	0	0	0	0	0	0	0	0	0	0	0	0	0	0	0	0	0	0	0	0	0	0	0	0
1529	1	42	8	8	1	2	3	4	0	0	7	0	9	10	11	0	0	0	1	0	1		7-14 marzo	0	0	0	0	0	0	0	0	0	0	0	0	0	0	0	0	0	0	0	0	0	0	0	0	0	0
3800	0	39	8	8	0	0	0	0	0	0	0	0	0	0	0	0	0	0	1	0	1		7-14 marzo	1	2	0	4	5	6	7	8	9	10	11	12	13	14	15	16	0	0	0	0	21	22	0	0	25	26
1116	0	61	8	8	1	2	0	4	5	6	7	0	0	10	11	12	0	0	1	0	1		2-6 marzo	0	2	3	0	0	0	0	0	0	0	0	12	0	0	15	0	0	0	0	0	21	22	0	0	25	26
1207	0	41	8	8	0	0	0	0	0	0	0	0	0	0	0	0	0	0	1	0	1		2-6 marzo	0	0	0	0	0	0	0	0	0	0	0	12	0	0	0	16	0	0	0	0	21	0	0	0	25	0
1453	0	41	8	8	0	0	0	0	0	0	0	0	0	0	0	0	0	0	1	0	1		2-6 marzo	1	2	3	4	5	6	7	0	9	10	11	12	13	14	0	16	0	0	0	0	21	22	23	24	25	26
1455	1	42	8	8	0	0	0	0	0	0	0	0	0	0	0	0	0	0	1	0	1		7-14 marzo	1	2	0	4	5	6	0	0	9	10	0	12	0	0	15	0	0	0	0	0	21	0	0	24	25	26
339	1	32	8	8	1	0	3	0	0	0	7	0	0	10	0	0	0	0	1	0	1		2-6 marzo	1	2	3	4	5	6	0	0	9	10	0	0	0	14	15	0	0	0	0	0	0	22	0	0	25	26
1526	0	69	8	8	0	0	0	0	0	0	0	0	0	0	0	0	0	0	1	0	1		7-14 marzo	0	2	3	4	0	6	0	0	0	0	0	0	0	0	0	0	0	0	0	0	0	0	23	0	25	26
3510	0	48	9	9	0	0	0	0	0	0	0	0	0	0	0	0	0	0	1	0	1		21-23 febbraio	1	2	3	4	5	6	0	0	9	10	0	12	13	14	0	16	0	0	0	0	21	0	0	24	25	26
26	1	57	9	9	0	0	0	0	0	0	0	0	0	0	0	0	0	0	1	0	1		7-14 marzo	1	2	3	4	5	6	7	0	9	10	0	12	13	0	0	16	0	0	0	0	21	0	23	0	25	26
2816	1	60	9	9	0	0	0	0	0	0	0	0	0	0	0	0	0	0	1	0	1		21-23 febbraio	0	0	0	0	0	0	0	0	0	0	0	0	0	0	0	0	0	0	0	0	0	0	0	0	0	0
400	0	60	9	9	0	0	0	0	0	0	0	0	0	0	0	0	0	0	1	0	1		7-14 marzo	0	2	3	4	5	6	0	0	0	0	0	12	13	0	0	0	0	0	0	0	21	0	0	24	25	26
467	0	62	9	9	0	0	0	0	0	0	0	0	0	0	0	0	0	0	1	0	1		24 febbraio - 1 marzo	1	2	0	4	5	0	0	0	0	10	0	0	13	14	0	0	0	0	0	0	21	22	0	0	25	26
2578	0	62	9	9	0	0	0	0	0	0	0	0	0	0	0	0	0	0	1	0	1		21-23 febbraio	0	0	0	0	0	0	0	0	0	0	0	0	0	0	0	0	0	0	0	0	0	0	0	0	0	0
471	0	66	9	9	0	0	0	0	0	0	0	0	0	0	0	0	0	0	1	0	1		2-6 marzo	1	2	3	4	0	0	0	0	9	0	0	12	13	14	0	16	0	0	0	0	21	0	0	24	25	26
1260	0	53	9	9	1	0	0	4	0	6	0	0	9	0	0	0	0	0	1	0	1		21-23 febbraio	0	0	0	0	0	0	0	0	0	0	0	0	0	0	0	0	0	0	0	0	0	0	0	0	0	0
3819	0	57	9	9	1	0	0	0	0	0	0	0	9	0	11	0	0	0	1	0	1		7-14 marzo	1	2	0	4	5	6	0	0	0	0	0	12	13	0	0	16	0	0	0	0	21	0	0	24	25	26
931	0	71	13	1	0	0	0	0	0	0	0	0	0	0	0	0	0	0	1	0	1		21-23 febbraio	0	0	0	0	0	0	0	0	0	0	0	0	0	0	0	0	0	0	0	0	0	0	0	0	0	0
2799	0	43	4	4	0	0	0	0	0	0	0	0	0	0	0	0	0	0	1	0	1		2-6 marzo	0	2	0	4	5	6	0	0	9	10	11	12	0	14	0	0	0	18	0	0	21	22	0	24	25	26
3508	0	29	4	1	1	0	0	4	0	6	0	8	9	0	11	0	0	0	1	0	1		2-6 marzo	1	2	3	4	5	6	0	0	9	10	0	12	0	14	15	0	17	0	0	0	21	0	23	24	25	26
3631	0	40	4	4	0	0	0	0	0	0	0	0	0	0	0	0	0	0	1	0	1		7-14 marzo	1	2	3	0	5	0	0	0	9	10	0	0	13	14	0	16	0	0	0	0	21	0	0	24	25	0
3008	1	63	4	4	0	0	0	0	0	0	0	0	0	0	0	0	0	0	1	0	1		2-6 marzo	1	2	3	4	5	6	0	0	9	10	11	12	13	0	15	0	0	0	0	0	21	22	0	0	25	0
2600	0	35	4	4	1	0	0	0	5	6	0	8	0	0	0	0	0	14	1	0	1		24 febbraio - 1 marzo	1	2	3	0	0	6	0	0	0	10	0	12	13	0	15	0	0	0	0	0	21	0	0	24	25	26
1792	1	24	7	1	0	0	0	0	0	0	0	0	0	0	0	0	0	0	2	0	1		7-14 marzo	1	0	0	0	0	6	7	0	9	10	0	12	0	14	15	0	0	0	0	0	0	0	0	24	25	26
1555	0	30	7	1	0	0	0	0	0	0	0	0	0	0	0	0	0	0	1	0	1		7-14 marzo	1	2	3	4	5	6	7	8	9	10	0	12	13	14	0	0	0	0	0	0	21	22	0	24	25	0
554	0	26	7	7	0	0	0	0	0	0	0	0	0	0	0	0	0	0	2	0	1		2-6 marzo	1	2	3	4	5	6	0	0	9	10	0	12	13	0	0	0	0	0	0	0	21	22	0	0	25	26
1528	1	56	7	7	1	0	3	0	0	6	0	0	0	0	11	0	0	0	1	0	1		7-14 marzo	1	2	3	4	5	6	0	0	0	0	0	12	0	0	15	0	0	0	0	0	21	22	0	0	25	26
2260	0	58	7	4	0	0	0	0	0	0	0	0	0	0	0	0	0	0	1	0	1		2-6 marzo	0	2	3	4	5	6	0	0	9	0	0	12	13	14	0	16	0	0	0	0	21	0	0	24	0	0
1123	0	61	7	1	1	0	0	0	0	0	0	0	0	0	0	0	0	0	2	0	1		Dopo il 15 marzo	0	0	0	0	0	6	0	0	0	0	0	0	0	0	0	0	0	0	0	0	0	0	0	0	0	0
1672	1	55	7	7	0	0	0	0	0	0	0	0	0	0	0	0	0	0	1	0	1		7-14 marzo	0	0	0	0	0	0	0	0	0	0	0	0	0	0	0	0	0	0	0	0	0	0	0	0	0	0
1549	0	43	7	8	0	0	0	0	0	0	0	0	0	0	0	0	0	0	1	0	1		7-14 marzo	1	0	0	4	0	6	0	0	0	0	0	0	0	0	0	0	0	0	0	0	21	0	0	24	25	0
2126	0	65	7	7	0	0	0	0	0	0	0	0	0	0	0	0	0	0	1	0	1		2-6 marzo	0	2	0	4	5	0	0	0	0	10	0	12	0	0	15	16	0	0	0	0	21	22	0	0	25	26
2641	0	68	7	7	0	0	0	0	0	0	0	0	0	0	0	0	0	0	2	0	1		21-23 febbraio	0	0	0	0	0	0	0	0	0	0	0	0	0	0	0	0	0	0	0	0	0	0	0	0	0	0
2972	0	34	7	7	1	0	0	0	5	0	0	0	0	0	0	0	0	0	1	0	1		7-14 marzo	1	2	3	4	5	6	0	0	0	10	0	12	13	0	0	0	0	0	0	0	0	0	0	0	25	0
2618	0	58	7	7	1	2	3	0	5	6	0	0	9	0	11	12	0	0	1	0	1		2-6 marzo	1	2	3	4	5	6	0	0	9	10	0	12	13	14	15	16	0	0	0	0	21	22	0	0	25	26
43	0	63	10	10	0	0	0	0	0	0	0	0	0	0	0	0	0	0	1	0	1		2-6 marzo	1	2	0	4	5	6	7	0	0	0	0	0	0	0	0	16	0	0	0	0	0	22	0	24	25	26
3139	0	34	10	10	1	2	0	0	0	0	0	0	0	0	0	0	0	0	1	0	1		7-14 marzo	0	2	0	4	5	6	0	0	0	0	0	12	13	14	0	0	0	0	0	0	21	0	0	24	25	26
7	1	31	10	10	0	0	0	0	0	0	0	0	0	0	0	0	0	0	1	0	1		2-6 marzo	0	0	0	0	0	0	0	0	0	0	0	0	0	0	0	0	0	0	0	0	0	0	0	0	0	0
1005	0	62	3	3	0	0	0	0	0	0	0	0	0	0	0	0	0	0	2	0	1		7-14 marzo	1	2	3	4	5	6	0	0	0	10	0	12	0	14	15	0	0	0	0	0	21	0	0	24	25	26
2939	0	42	3	3	1	0	0	0	0	0	0	0	0	0	0	12	13	0	1	0	1		7-14 marzo	1	2	0	4	5	6	0	0	9	10	0	12	13	14	0	16	0	0	0	0	21	22	0	24	25	26
3212	0	64	3	1	0	0	0	0	0	0	0	0	0	0	0	0	0	0	2	0	1		7-14 marzo	1	0	3	4	5	6	0	0	9	10	0	12	13	14	15	0	0	0	0	0	21	0	0	24	25	26
2771	0	55	3	1	0	0	0	0	0	0	0	0	0	0	0	0	0	0	1	0	1		7-14 marzo	1	2	0	4	5	6	0	0	9	10	11	12	13	0	15	0	0	0	0	0	21	0	0	24	25	26
2257	1	34	3	3	0	0	0	0	0	0	0	0	0	0	0	0	0	0	1	0	1		7-14 marzo	1	2	3	4	5	6	7	0	9	10	0	12	13	14	0	16	0	0	0	0	21	22	0	0	25	26
2919	1	50	3	3	1	2	3	4	0	6	7	8	9	10	0	0	0	14	2	0	1		2-6 marzo	1	2	0	4	5	6	0	0	9	10	0	12	13	14	15	0	0	0	0	0	21	0	23	0	0	26
2886	0	68	3	3	0	0	0	0	0	0	0	0	0	0	0	0	0	0	2	0	1		7-14 marzo	0	0	0	0	0	0	0	0	0	0	0	0	0	0	0	0	0	0	0	0	0	0	0	0	0	0
2912	0	71	3	3	0	0	0	0	0	0	0	0	0	0	0	0	0	0	1	0	1		2-6 marzo	1	0	0	0	0	6	0	0	0	10	0	0	0	0	15	0	0	0	0	0	0	0	23	0	0	0
3182	0	60	3	3	1	0	3	4	0	0	0	8	9	10	11	0	0	0	2	0	1		24 febbraio - 1 marzo	1	2	3	4	5	6	7	8	9	10	0	12	13	14	15	16	0	0	0	0	21	22	23	0	25	26
2674	0	41	6	6	1	0	0	0	0	0	0	0	0	10	0	12	0	0	1	0	1		2-6 marzo	0	2	3	4	5	0	0	0	0	0	0	12	13	14	0	16	0	0	0	0	0	0	0	24	0	0
1984	0	48	6	6	0	0	0	0	0	0	0	0	0	0	0	0	0	0	1	0	1		7-14 marzo	0	2	0	0	0	0	0	0	9	10	11	12	0	0	0	0	0	0	0	0	0	0	0	0	25	0
1561	1	35	6	6	1	2	3	4	0	0	7	0	9	0	11	12	0	0	1	0	1		2-6 marzo	1	2	3	4	5	6	0	0	9	10	11	12	13	14	15	0	0	0	0	0	21	0	23	24	25	26
3046	0	39	6	6	1	2	0	4	0	6	7	8	9	0	11	0	0	14	2	0	1		2-6 marzo	1	2	3	4	5	6	7	8	9	10	11	12	13	14	0	16	0	0	0	0	0	0	0	24	25	26
1878	0	54	6	6	0	0	0	0	0	0	0	0	0	0	0	0	0	0	2	0	1		7-14 marzo	0	2	0	4	5	0	0	0	0	0	0	12	13	0	0	16	0	0	0	0	0	0	0	24	25	0
2530	0	39	6	6	1	0	0	0	0	0	0	0	0	0	0	12	13	0	1	0	1		24 febbraio - 1 marzo	0	0	0	0	0	0	0	0	0	0	0	0	0	0	0	0	0	0	0	0	0	0	0	0	0	0
3633	0	64	6	6	0	0	0	0	0	0	0	0	0	0	0	0	0	0	1	0	1		2-6 marzo	1	2	3	4	5	6	0	8	9	10	11	12	13	14	0	16	0	0	0	0	21	22	23	0	25	26
2820	1	58	6	6	0	0	0	0	0	0	0	0	0	0	0	0	0	0	1	0	1		7-14 marzo	1	2	3	0	5	6	0	0	9	10	0	12	13	14	0	16	0	0	0	0	21	22	23	0	25	26
2883	1	48	6	6	1	0	0	0	0	0	0	0	9	0	0	0	0	0	1	0	1		7-14 marzo	1	2	0	4	5	6	0	0	9	10	11	12	13	14	0	16	0	0	0	0	0	22	23	0	25	0
2839	1	28	6		0	0	0	0	0	0	0	0	0	0	0	0	0	0	1	0	1		2-6 marzo	1	2	0	4	5	6	0	8	9	0	0	12	13	0	0	16	0	0	0	0	21	22	0	0	25	26
777	0	62	6	6	0	0	0	0	0	0	0	0	0	0	0	0	0	0	1	0	1		2-6 marzo	1	2	0	4	5	6	7	8	0	0	0	12	13	14	15	0	0	0	0	0	21	22	0	0	25	0
2908	0	41	6	6	0	0	0	0	0	0	0	0	0	0	0	0	0	0	1	0	1		24 febbraio - 1 marzo	0	2	3	0	0	0	0	0	9	10	11	12	0	0	0	16	0	0	0	0	0	0	0	0	0	0
1256	0	42	6	6	0	0	0	0	0	0	0	0	0	0	0	0	0	0	1	0	1		2-6 marzo	0	2	0	4	5	6	0	0	0	0	0	12	0	0	0	16	0	0	0	0	0	0	0	24	25	26
192	1	35	6	6	0	0	0	0	0	0	0	0	0	0	0	0	0	0	1	0	1		7-14 marzo	0	0	0	0	0	0	0	0	0	0	0	0	0	0	0	0	0	0	0	0	21	22	23	0	25	26
3739	1	25	6	6	1	2	0	4	0	6	0	0	0	0	0	12	13	14	1	0	1		7-14 marzo	1	2	3	4	5	6	0	0	0	10	0	12	13	14	0	16	0	0	0	0	21	0	0	0	25	0
1267	1	58	6	6	1	0	0	4	0	0	0	0	0	0	0	0	13	0	1	0	1		7-14 marzo	0	2	0	4	5	6	0	0	9	0	0	12	13	0	0	16	0	0	0	0	0	22	0	24	25	0
2205	1	32	6	6	0	0	0	0	0	0	0	0	0	0	0	0	0	0	1	0	1		7-14 marzo	0	0	0	0	0	0	0	0	0	0	0	0	0	0	0	0	0	0	0	0	0	0	0	0	0	0
967	1	48	6	6	1	2	0	0	0	0	7	0	0	0	0	0	0	0	1	0	1		7-14 marzo	0	0	0	0	0	0	0	0	0	0	0	0	0	0	0	0	0	0	0	0	0	0	0	0	0	0
3055	1	41	6	6	1	2	0	0	0	6	7	0	0	10	0	12	0	0	2	0	1		2-6 marzo	1	2	3	4	5	6	0	0	0	0	11	12	13	14	0	16	0	0	0	0	21	0	0	24	25	0
940	0	27	6	6	0	0	0	0	0	0	0	0	0	0	0	0	0	0	1	0	1		7-14 marzo	0	0	0	0	0	6	0	0	0	0	0	0	0	0	0	0	0	0	0	0	0	0	0	0	25	26
3037	1	58	6	6	1	0	0	0	0	0	0	0	0	0	0	0	0	0	2	0	1		2-6 marzo	1	2	3	4	5	6	7	8	9	10	11	12	0	0	0	16	0	18	0	0	21	22	23	0	25	26
1729	1	27	6	5	1	2	3	0	0	6	0	0	0	0	0	0	0	0	1	0	1		7-14 marzo	1	2	0	0	5	6	0	0	9	10	0	12	13	14	0	0	0	0	0	0	0	0	0	24	25	26
1070	0	56	6	6	1	2	0	0	0	6	0	0	0	0	0	12	0	0	1	0	1		7-14 marzo	1	0	3	4	5	6	0	0	9	10	0	0	13	0	0	0	0	0	0	20	21	0	0	24	25	26
2758	0	47	5	5	0	0	0	0	0	0	0	0	0	0	0	0	0	0	1	0	1		21-23 febbraio	0	0	3	0	0	0	0	0	0	0	0	0	0	0	0	0	0	0	0	0	0	0	0	0	0	0
3013	1	42	5	5	0	0	0	0	0	0	0	0	0	0	0	0	0	0	1	0	1		2-6 marzo	1	2	3	4	5	6	0	0	9	0	0	12	13	14	0	16	0	0	0	0	21	22	0	0	25	26
337	0	30	5	5	0	0	0	0	0	0	0	0	0	0	0	0	0	0	1	0	1		7-14 marzo	1	2	0	4	5	0	7	8	9	10	11	12	13	14	0	16	0	0	0	0	21	0	0	24	0	26
2655	0	26	5	5	0	0	0	0	0	0	0	0	0	0	0	0	0	0	2	0	1		7-14 marzo	0	0	0	0	0	0	0	0	0	0	0	0	0	0	0	0	0	0	0	0	0	0	0	0	0	0
1442	0	33	5	5	0	0	0	0	0	0	0	0	0	0	0	0	0	0	2	0	1		7-14 marzo	0	0	0	0	0	0	0	0	0	0	0	0	0	0	0	0	0	0	0	0	0	0	0	0	0	0
239	1	28	5	5	1	0	0	0	0	0	0	0	0	0	0	0	0	14	1	0	1		7-14 marzo	0	0	0	0	0	0	0	0	0	0	0	0	0	0	0	0	0	0	0	0	0	0	0	0	0	0
1096	1	33	5	1	1	2	3	4	0	6	7	8	9	10	0	12	13	0	1	0	1		24 febbraio - 1 marzo	1	2	3	4	5	6	7	0	9	10	11	12	13	14	15	16	0	0	0	0	21	22	23	24	25	26
935	0	42	5	5	0	0	0	0	0	0	0	0	0	0	0	0	0	0	1	0	1		2-6 marzo	1	0	3	4	0	0	0	0	9	10	11	12	13	14	0	16	0	0	0	0	21	22	23	0	25	26
3479	1	29	5	5	0	0	0	0	0	0	0	0	0	0	0	0	0	0	2	0	1		7-14 marzo	1	2	3	4	5	0	0	0	0	10	0	0	0	0	0	0	0	0	0	0	21	0	0	24	25	26
2704	0	27	5		0	0	0	0	0	0	0	0	0	0	0	0	0	0	1	0	1		24 febbraio - 1 marzo	0	2	0	4	0	6	7	0	9	0	0	12	0	0	0	16	0	0	0	0	21	22	0	0	25	0
3188	1	63	5	5	0	0	0	0	0	0	0	0	0	0	0	0	0	0	1	0	1		2-6 marzo	1	2	3	4	5	6	0	0	9	10	11	12	13	14	0	0	17	0	0	0	21	22	23	0	0	26
2982	0	45	5	6	1	0	0	0	0	0	0	0	0	0	0	0	0	0	1	0	1		2-6 marzo	1	2	0	4	5	6	0	0	9	10	11	12	13	0	0	16	0	0	0	0	0	0	0	24	25	26
698	1	51	5	5	0	0	0	0	0	0	0	0	0	0	0	0	0	0	1	0	1		7-14 marzo	1	2	3	4	5	6	0	0	0	10	0	12	13	14	15	16	0	18	0	0	21	0	23	24	25	26
3596	0	33	5	5	0	0	0	0	0	0	0	0	0	0	0	0	0	0	1	0	1		21-23 febbraio	0	0	0	0	0	0	0	0	0	0	0	0	0	0	0	0	0	0	0	0	0	0	0	0	0	0
2555	0	62	5	5	0	0	0	0	0	0	0	0	0	0	0	0	0	0	1	0	1		7-14 marzo	1	2	3	4	5	6	0	0	9	10	11	12	13	14	0	16	0	0	0	0	21	22	0	0	25	26
2832	0	46	5	5	1	2	3	4	5	0	0	0	0	10	11	12	13	0	1	0	1		7-14 marzo	1	2	0	4	5	6	0	0	0	0	0	12	13	14	15	16	0	0	0	0	0	22	23	0	25	26
835	0	65	5	5	0	0	0	0	0	0	0	0	0	0	0	0	0	0	1	0	1		2-6 marzo	0	2	0	0	5	6	0	0	9	0	0	0	0	0	0	0	0	0	0	0	0	22	0	0	0	0
2215	1	64	5	5	0	0	0	0	0	0	0	0	0	0	0	0	0	0	1	0	1		7-14 marzo	0	0	3	4	5	0	0	0	9	0	11	12	13	0	15	0	0	0	0	0	21	22	0	0	25	26
675	0	33	5	5	0	0	0	0	0	0	0	0	0	0	0	0	0	0	2	0	1		7-14 marzo	1	2	3	0	0	6	7	8	9	10	11	12	0	0	0	16	0	0	0	0	21	0	0	24	25	0
1573	1	61	5	5	0	0	0	0	0	0	0	0	0	0	0	0	0	0	1	0	1		7-14 marzo	0	0	0	4	5	0	0	0	0	0	0	12	0	0	0	0	0	0	0	0	21	0	0	24	0	26
2918	1	34	5	6	0	0	0	0	0	0	0	0	0	0	0	0	0	0	2	0	1		7-14 marzo	1	2	3	4	0	6	0	0	9	0	11	12	13	0	0	0	0	0	0	0	0	0	0	0	25	0
2362	0	67	5	5	1	0	0	0	0	0	0	8	0	10	11	0	0	14	1	0	1		21-23 febbraio	0	0	0	0	0	0	0	0	0	0	0	0	0	0	0	0	0	0	0	0	0	0	0	0	0	0
2443	0	62	5	5	1	0	0	0	5	0	0	0	0	0	0	0	0	0	1	0	1		7-14 marzo	1	2	3	4	5	6	0	0	9	10	0	0	13	14	0	16	0	0	0	0	0	0	0	24	0	0
1717	1	46	5	5	0	0	0	0	0	0	0	0	0	0	0	0	0	0	1	0	1		7-14 marzo	1	0	0	0	0	6	0	0	0	10	0	12	0	14	0	16	0	0	0	0	21	0	0	24	25	0
1376	0	63	5		0	0	0	0	0	0	0	0	0	0	0	0	0	0	1	0	1			0	0	0	0	0	0	0	0	0	0	0	0	0	0	0	0	0	0	0	0	0	0	0	0	0	0
763	0	61	5	5	1	2	3	4	0	0	0	0	0	0	0	0	0	0	1	0	1		2-6 marzo	0	2	3	4	0	0	0	0	0	0	11	12	13	14	0	16	0	0	0	0	0	0	0	24	25	26
3106	0	65	5	5	0	0	0	0	0	0	0	0	0	0	0	0	0	0	1	0	1		2-6 marzo	1	2	3	4	5	6	0	0	9	10	11	12	13	0	0	16	0	0	0	0	21	22	0	0	25	26
720	0	53	2	2	0	0	0	0	0	0	0	0	0	0	0	0	0	0	1	0	1		21-23 febbraio	0	0	0	0	0	0	0	0	0	0	0	0	0	0	0	0	0	0	0	0	0	0	0	0	0	0
229	0	30	2	2	0	0	0	0	0	0	0	0	0	0	0	0	0	0	1	0	1		24 febbraio - 1 marzo	1	2	3	4	5	0	0	8	9	10	11	12	0	14	0	16	0	0	0	20	0	22	23	24	25	26
3496	0	44	2	2	1	0	3	0	0	0	0	0	0	0	0	0	0	0	2	0	1		2-6 marzo	1	0	0	0	0	0	0	8	9	0	11	12	13	0	0	16	0	0	0	0	0	22	0	0	25	0
1253	1	54	2	2	0	0	0	0	0	0	0	0	0	0	0	0	0	0	1	0	1		7-14 marzo	0	0	0	0	0	0	0	0	0	0	0	0	0	0	0	0	0	0	0	0	0	0	0	0	0	0
2861	1	46	2	2	1	2	3	4	0	0	7	0	9	10	0	0	0	0	2	0	1		7-14 marzo	1	2	0	0	5	6	0	0	9	0	11	12	13	14	0	0	0	18	0	0	21	22	0	0	25	26
1053	0	43	2	6	0	0	0	0	0	0	0	0	0	0	0	0	0	0	2	0	1		24 febbraio - 1 marzo	0	0	0	0	0	0	0	0	0	0	0	0	0	0	0	0	0	0	0	0	0	0	0	0	0	0
559	0	41	2	2	0	0	0	0	0	0	0	0	0	0	0	0	0	0	1	0	1		7-14 marzo	0	0	3	4	0	6	0	0	9	0	0	12	13	14	15	0	0	0	0	0	0	0	0	24	25	26
1446	1	45	2	2	0	0	0	0	0	0	0	0	0	0	0	0	0	0	2	0	1			0	0	0	0	0	0	0	0	0	0	0	0	0	0	0	0	0	0	0	0	0	0	0	0	0	0
660	0	71	2	2	0	0	0	0	0	0	0	0	0	0	0	0	0	0	1	0	1		24 febbraio - 1 marzo	0	0	0	0	0	0	0	0	0	0	0	0	0	0	0	0	0	0	0	0	0	0	0	0	0	0
717	0	59	2	2	1	0	0	4	0	0	7	0	0	10	0	0	0	0	1	0	1		21-23 febbraio	0	0	0	0	0	0	0	0	0	0	0	0	0	0	0	0	0	0	0	0	0	0	0	0	0	0
862	0	61	2	2	1	2	0	0	0	0	7	0	0	0	0	0	0	0	1	0	1		21-23 febbraio	1	2	3	4	5	6	7	8	9	10	11	12	13	14	15	16	0	18	0	0	21	22	0	24	25	26
2427	0	32	11	11	0	0	0	0	0	0	0	0	0	0	0	0	0	0	1	0	1		21-23 febbraio	0	0	0	0	0	0	0	0	0	0	0	0	0	0	0	0	0	0	0	0	0	0	0	0	0	0
3006	1	28	11	1	0	0	0	0	0	0	0	0	0	0	0	0	0	0	2	0	1		7-14 marzo	1	2	3	0	5	6	0	0	9	10	11	12	0	14	0	0	0	0	0	0	21	0	0	24	25	26
1182	0	41	11	11	0	0	0	0	0	0	0	0	0	0	0	0	0	0	1	0	1		21-23 febbraio	1	2	3	4	5	6	7	0	9	10	0	12	13	0	0	0	0	0	0	20	21	0	0	0	25	0
3628	0	25	11	1	0	0	0	0	0	0	0	0	0	0	0	0	0	0	1	0	1		21-23 febbraio	1	2	3	0	0	6	0	0	0	10	11	12	13	14	0	16	0	0	0	0	21	22	0	0	25	26
113	0	50	11	11	0	0	0	0	0	0	0	0	0	0	0	0	0	0	1	0	1		21-23 febbraio	1	2	0	4	0	6	0	0	0	0	0	12	13	0	0	16	0	0	0	0	0	0	0	24	25	0
768	0	65	11	11	0	0	0	0	0	0	0	0	0	0	0	0	0	0	1	0	1		7-14 marzo	1	2	0	4	5	6	7	0	0	10	0	12	13	14	0	16	0	0	0	0	21	0	0	24	25	26
2668	1	57	11	11	0	0	0	0	0	0	0	0	0	0	0	0	0	0	1	0	1		21-23 febbraio	1	2	3	4	5	6	7	0	9	10	0	12	13	14	0	16	0	0	0	0	21	22	0	0	25	26
1786	0	71	9	1	0	0	0	0	0	0	0	0	0	0	0	0	0	0	1	0	1		7-14 marzo	1	2	3	4	5	0	0	0	9	10	0	12	13	0	0	0	0	0	0	20	21	22	0	0	25	26
683	0	67	9	9		0	0	0	0	0	0	0	0	0	0	0	0	14	1	0	1		Dopo il 15 marzo	0	0	0	0	0	0	0	0	0	0	0	0	0	0	0	0	0	0	0	0	0	0	0	0	0	0
3348	1	25	9		0	0	0	0	0	0	0	0	0	0	0	0	0	0		0	1		21-23 febbraio	0	0	0	0	0	0	0	0	0	0	0	0	0	0	0	0	0	0	0	0	0	0	0	0	0	0
1395	1	70	9		0	0	0	0	0	0	0	0	0	0	0	0	0	0	1	0	1		24 febbraio - 1 marzo	0	0	0	0	0	0	0	0	0	0	0	0	0	0	0	0	0	0	0	0	0	0	0	0	0	0
42	0	48	9	1	0	0	0	0	0	0	0	0	0	0	0	0	0	0	1	0	1		Dopo il 15 marzo	0	0	0	0	0	0	0	0	0	0	0	0	0	0	0	0	0	0	0	0	0	0	0	0	0	0
3371	1	50	9	9	0	0	0	0	0	0	0	0	0	0	0	0	0	0	1	0	1		2-6 marzo	1	2	3	4	5	6	0	0	9	10	0	12	13	0	0	16	0	0	0	0	21	0	0	24	25	26
3765	1	26	9	9	1	2	0	4	0	0	0	0	0	10	11	0	13	0	1	0	1		24 febbraio - 1 marzo	1	2	3	4	5	6	0	8	9	10	11	12	13	14	0	0	0	0	0	0	21	22	23	24	25	26
27	1	41	9	9	1	2	0	4	0	6	7	0	0	0	11	12	13	0	1	0	1		21-23 febbraio	0	0	0	0	0	0	0	0	0	0	0	0	0	0	0	0	0	0	0	0	0	0	0	0	0	0
1624	1	25	9	1	0	0	0	0	0	0	0	0	0	0	0	0	0	0	2	0	1		7-14 marzo	0	2	0	0	0	0	0	0	0	0	0	12	0	0	0	0	0	0	0	0	0	0	0	0	25	0
2610	0	65	9	1	0	0	0	0	0	0	0	0	0	0	0	0	0	0	2	0	1		7-14 marzo	0	0	0	0	0	0	0	0	0	0	0	0	0	0	0	0	0	0	0	0	0	0	0	0	0	0
1192	1	29	13	1	0	0	0	0	0	0	0	0	0	0	0	0	0	0	2	0	1		7-14 marzo	1	2	3	4	5	0	0	0	9	10	0	12	13	14	0	16	0	0	0	0	21	0	0	24	25	26
2933	1	71	13	1	0	0	0	0	0	0	0	0	0	0	0	0	0	0	3	0	1		24 febbraio - 1 marzo	0	0	0	0	0	0	0	0	0	0	0	0	0	0	0	0	0	0	0	0	0	0	0	0	0	0
2629	0	43	13	4	0	0	0	0	0	0	0	0	0	0	0	0	0	0	1	0	1		2-6 marzo	1	2	3	4	5	6	7	8	9	10	0	12	13	14	15	16	0	0	0	0	21	22	23	24	25	26
3610	1	25	12	12	0	0	0	0	0	0	0	0	0	0	0	0	0	0	1	0	1		24 febbraio - 1 marzo	1	2	3	4	5	6	0	8	9	0	0	12	13	14	0	16	0	0	0	0	21	22	0	0	25	26
[truncated: 1,836 more rows]
[truncated: 20 more columns]
